# Supplementary material for: Long-Term Waterlogging as Factor Contributing to Hypoxia Stress Tolerance Enhancement in Cucumber: Comparative Transcriptome Analysis of Waterlogging Sensitive and Tolerant Accessions
Source: MDPI journal article supplement (doi:10.3390/genes12020189), 2021-01-28

**Supplementary Materials Figure S1.** Number of Differentially Expressed Genes identified by DESeq2 and edgeR in two cucumber DH lines under waterlogging stress

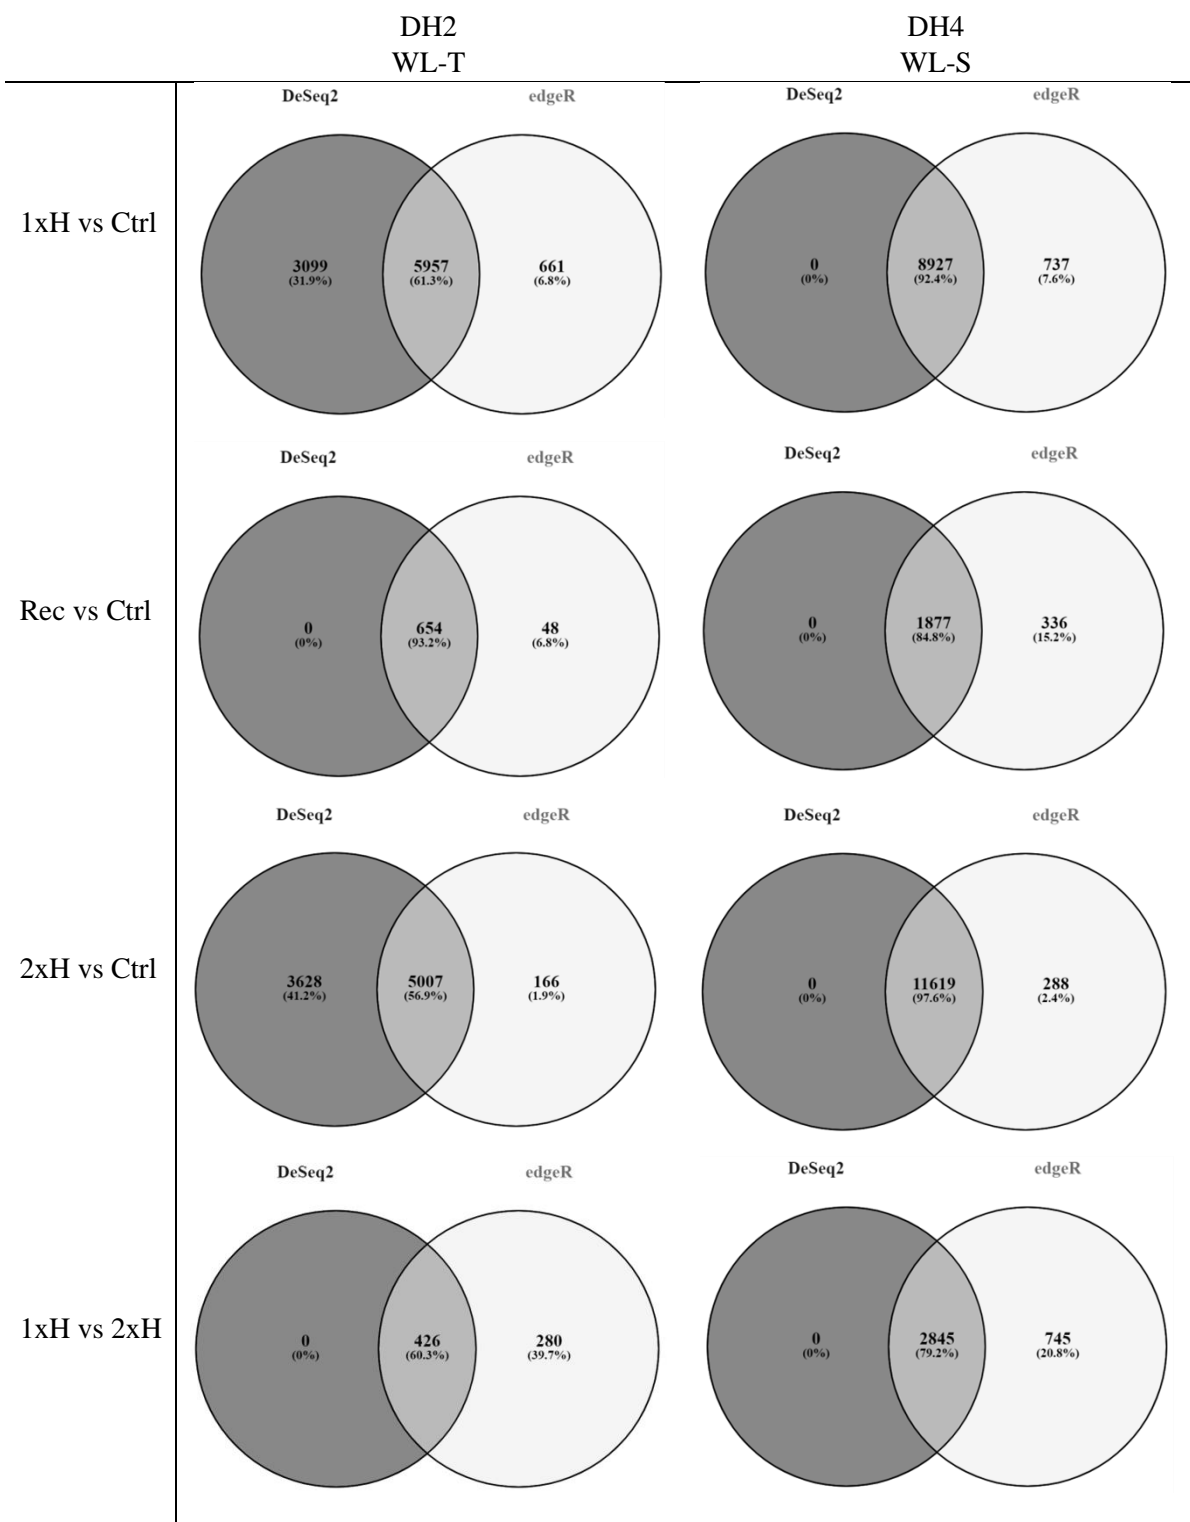

**Supplementary Materials Figure S2.** Pictorial representation of genes in WL-T DH2 and WL-S DH4 accessions associated with various MapMan functional metabolism categories under waterlogging stress.

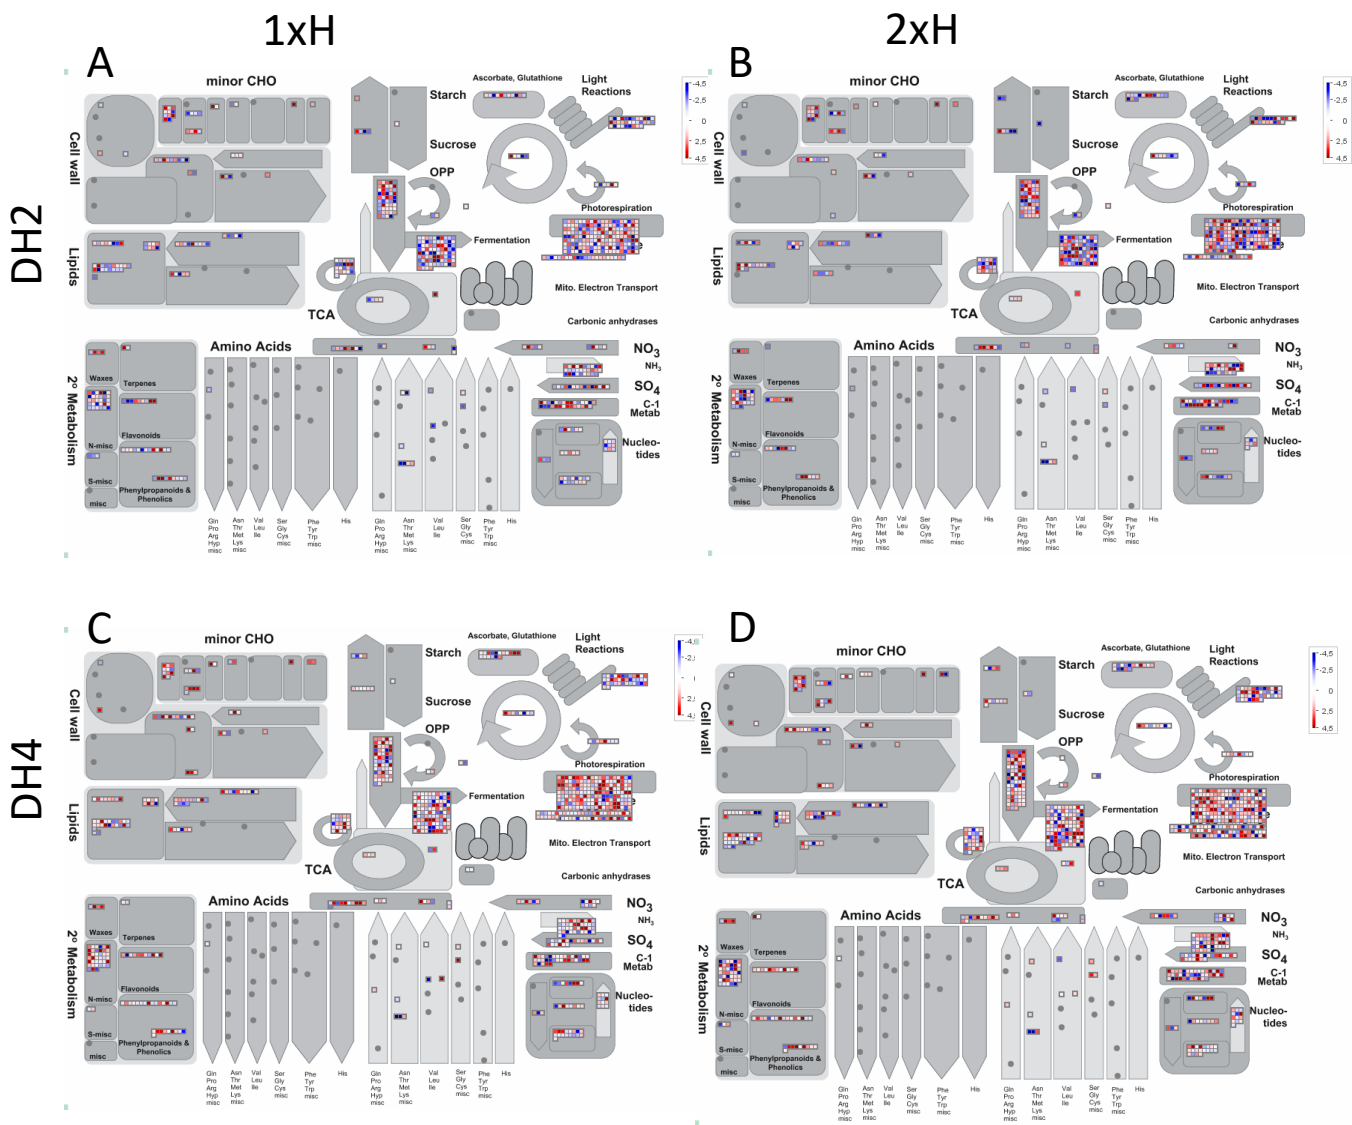

**Supplementary Materials Figure S3.** Pictorial representation of genes in WL-T DH2 (A, B) and WL-S DH4 (C, D) accessions associated with MapMan functional regulation overview under single (1xH) and repeated (2xH) waterlogging stress.

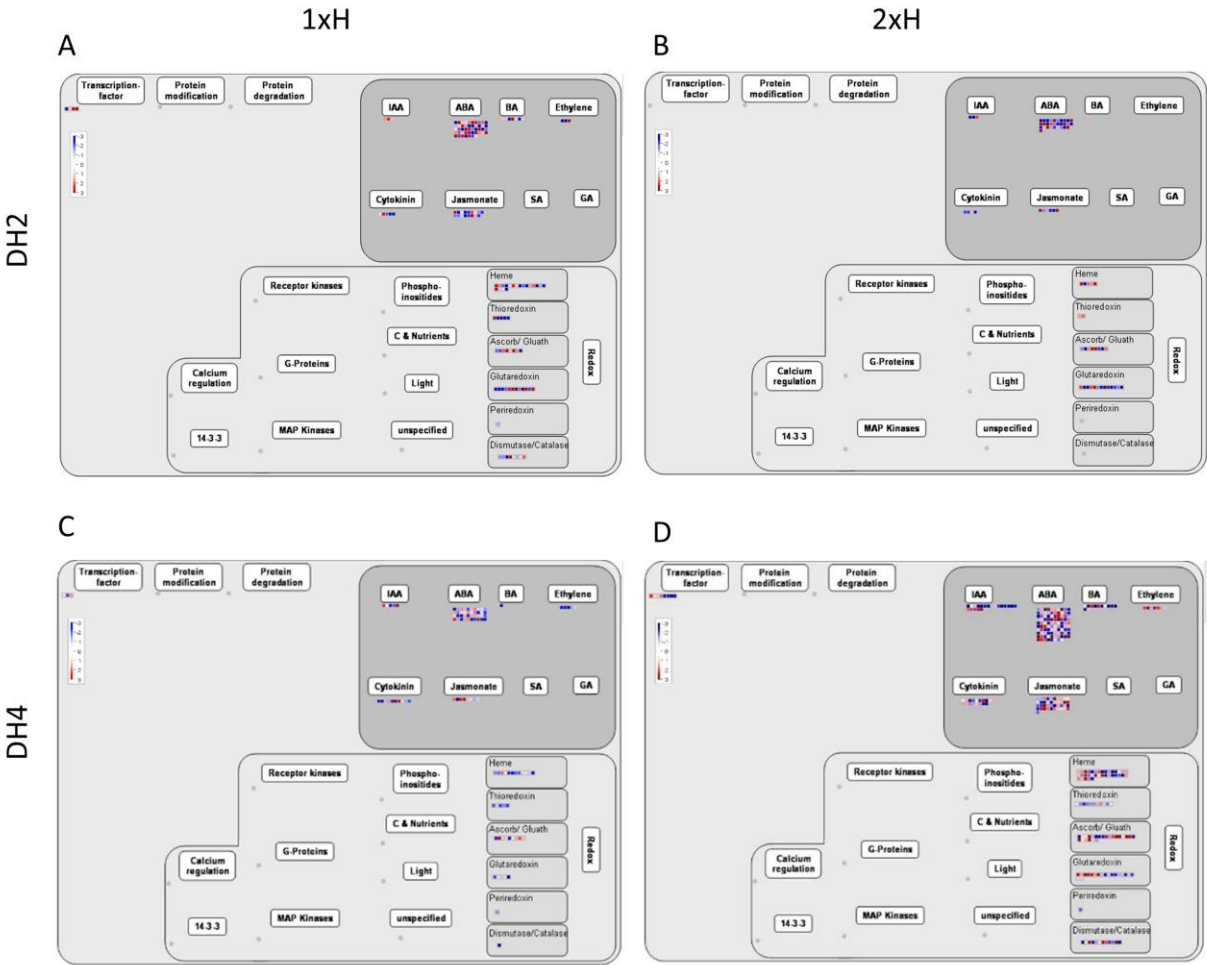

Supplement: s1 [file s1]
