# Supplementary material for: Long-Term Waterlogging as Factor Contributing to Hypoxia Stress Tolerance Enhancement in Cucumber: Comparative Transcriptome Analysis of Waterlogging Sensitive and Tolerant Accessions
Source: Genes (Basel). 2021 Jan 28;12(2):189. doi: 10.3390/genes12020189 (PMC7912563; doi:10.3390/genes12020189)
Supplement: Supplementary file 1 [file genes-12-00189-s001.zip › genes-1035154-supplementary_/Supplementary Materials Data S1-S10.xlsx]

## Sheet: Data Description
File name	Description
Supplementary Materials Data S1	KEGG mapping of Cucumis sativus L. transcripts.
Supplementary Materials Data S2	DEGs idetified in comparison DH2 1xH vs Ctrl
Supplementary Materials Data S3	DEGs idetified in comparison DH2 Rec vs Ctrl
Supplementary Materials Data S4	DEGs idetified in comparison DH2 2xH vs Ctrl
Supplementary Materials Data S5	DEGs idetified in comparison DH2 1xH vs 2xH
Supplementary Materials Data S6	DEGs idetified in comparison DH4 1xH vs Ctrl
Supplementary Materials Data S7	DEGs idetified in comparison DH4 Rec vs Ctrl
Supplementary Materials Data S8	DEGs idetified in comparison DH4 2xH vs Ctrl
Supplementary Materials Data S9	DEGs idetified in comparison DH4 1xH vs 2xH
Supplementary Materials Data S10	Common 305 DEGs identified in DH2 1xH vs Ctrl and DH4 2xH vs Ctrl

## Sheet: Supplementary Materials Data S1
Category	Subcategory	Pathway name [pathway id]	Transcipts number	Transcripts (Kegg Ortology)
Cellular Processes	09141 Transport and catabolism	Endocytosis [PATH:ko04144]	276	'TCONS_00028613,(K12182)''TCONS_00028613,(K12182)''TCONS_00034687,(K12192)''TCONS_00009976,(K07904)''TCONS_00023436,(K01528)''TCONS_00021160,(K12489)''TCONS_00021160,(K12489)''TCONS_00021160,(K12489)''TCONS_00021160,(K12489)''TCONS_00021160,(K12489)''TCONS_00021160,(K12489)''TCONS_00021160,(K12489)''TCONS_00015259,(K18443)''TCONS_00015259,(K18443)''TCONS_00015259,(K18443)''TCONS_00015259,(K18443)…
Cellular Processes	09141 Transport and catabolism	Autophagy - yeast [PATH:ko04138]	154	'TCONS_00025202,(K18584)''TCONS_00024234,(K08493)''TCONS_00032491,(K07203)''TCONS_00032491,(K07203)''TCONS_00032491,(K07203)''TCONS_00016194,(K08336)''TCONS_00009315,(K08341)''TCONS_00030429,(K12479)''TCONS_00030429,(K12479)''TCONS_00030429,(K12479)''TCONS_00030429,(K12479)''TCONS_00029739,(K20179)''TCONS_00003575,(K20195)''TCONS_00003575,(K20195)''TCONS_00014872,(K17907)''TCONS_00014872,(K17907)…
Cellular Processes	09141 Transport and catabolism	Autophagy - animal [PATH:ko04140]	128	'TCONS_00019241,(K07874)''TCONS_00016186,(K01363)''TCONS_00016186,(K01363)''TCONS_00032491,(K07203)''TCONS_00032491,(K07203)''TCONS_00032491,(K07203)''TCONS_00016194,(K08336)''TCONS_00009315,(K08341)''TCONS_00028072,(K08852)''TCONS_00028072,(K08852)''TCONS_00028072,(K08852)''TCONS_00014872,(K17907)''TCONS_00014872,(K17907)''TCONS_00014872,(K17907)''TCONS_00015478,(K08269)''TCONS_00015478,(K08269)…
Cellular Processes	09141 Transport and catabolism	Peroxisome [PATH:ko04146]	127	'TCONS_00029990,(K13356)''TCONS_00032335,(K13349)''TCONS_00033179,(K13339)''TCONS_00009294,(K00232)''TCONS_00000301,(K13336)''TCONS_00008212,(K01897)''TCONS_00008212,(K01897)''TCONS_00008212,(K01897)''TCONS_00008212,(K01897)''TCONS_00011263,(K06664)''TCONS_00011263,(K06664)''TCONS_00011263,(K06664)''TCONS_00022080,(K00477)''TCONS_00022080,(K00477)''TCONS_00022080,(K00477)''TCONS_00022080,(K00477)…
Cellular Processes	09141 Transport and catabolism	Lysosome [PATH:ko04142]	110	'TCONS_00016186,(K01363)''TCONS_00016186,(K01363)''TCONS_00035560,(K12373)''TCONS_00022509,(K14379)''TCONS_00022509,(K14379)''TCONS_00017727,(K12400)''TCONS_00017727,(K12400)''TCONS_00017727,(K12400)''TCONS_00017727,(K12400)''TCONS_00017727,(K12400)''TCONS_00000486,(K12396)''TCONS_00003685,(K12398)''TCONS_00003685,(K12398)''TCONS_00003685,(K12398)''TCONS_00003685,(K12398)''TCONS_00022783,(K12391)…
Cellular Processes	09141 Transport and catabolism	Mitophagy - animal [PATH:ko04137]	87	'TCONS_00009315,(K08341)''TCONS_00031310,(K03097)''TCONS_00031310,(K03097)''TCONS_00014872,(K17907)''TCONS_00014872,(K17907)''TCONS_00014872,(K17907)''TCONS_00007989,(K03115)''TCONS_00007989,(K03115)''TCONS_00009315,(K08341)''TCONS_00002254,(K17969)''TCONS_00002254,(K17969)''TCONS_00029643,(K08334)''TCONS_00029643,(K08334)''TCONS_00029643,(K08334)''TCONS_00029643,(K08334)''TCONS_00029643,(K08334)…
Cellular Processes	09141 Transport and catabolism	Phagosome [PATH:ko04145]	86	'TCONS_00028613,(K12182)''TCONS_00028613,(K12182)''TCONS_00016932,(K08057)''TCONS_00016932,(K08057)''TCONS_00014498,(K08517)''TCONS_00014498,(K08517)''TCONS_00014498,(K08517)''TCONS_00014498,(K08517)''TCONS_00014498,(K08517)''TCONS_00022112,(K02148)''TCONS_00034329,(K00921)''TCONS_00034329,(K00921)''TCONS_00034329,(K00921)''TCONS_00026098,(K08492)''TCONS_00026098,(K08492)''TCONS_00026098,(K08492)…
Cellular Processes	09141 Transport and catabolism	Autophagy - other [PATH:ko04136]	80	'TCONS_00032491,(K07203)''TCONS_00032491,(K07203)''TCONS_00032491,(K07203)''TCONS_00016194,(K08336)''TCONS_00009315,(K08341)''TCONS_00014872,(K17907)''TCONS_00014872,(K17907)''TCONS_00014872,(K17907)''TCONS_00015478,(K08269)''TCONS_00015478,(K08269)''TCONS_00015478,(K08269)''TCONS_00015478,(K08269)''TCONS_00015478,(K08269)''TCONS_00015478,(K08269)''TCONS_00015478,(K08269)''TCONS_00015478,(K08269)…
Cellular Processes	09141 Transport and catabolism	Mitophagy - yeast [PATH:ko04139]	79	'TCONS_00018838,(K11088)''TCONS_00018838,(K11088)''TCONS_00020349,(K00889)''TCONS_00020349,(K00889)''TCONS_00020349,(K00889)''TCONS_00020349,(K00889)''TCONS_00020349,(K00889)''TCONS_00032491,(K07203)''TCONS_00032491,(K07203)''TCONS_00032491,(K07203)''TCONS_00020349,(K00889)''TCONS_00020349,(K00889)''TCONS_00020349,(K00889)''TCONS_00020349,(K00889)''TCONS_00020349,(K00889)''TCONS_00020349,(K00889)…
Cellular Processes	09142 Cell motility	Regulation of actin cytoskeleton [PATH:ko04810]	97	'TCONS_00020349,(K00889)''TCONS_00020349,(K00889)''TCONS_00020349,(K00889)''TCONS_00020349,(K00889)''TCONS_00020349,(K00889)''TCONS_00032000,(K05758)''TCONS_00032000,(K05758)''TCONS_00032000,(K05758)''TCONS_00032000,(K05758)''TCONS_00032000,(K05758)''TCONS_00034329,(K00921)''TCONS_00034329,(K00921)''TCONS_00034329,(K00921)''TCONS_00007490,(K05756)''TCONS_00007490,(K05756)''TCONS_00007490,(K05756)…
Cellular Processes	09143 Cell growth and death	Cell cycle [PATH:ko04110]	154	'TCONS_00034883,(K06632)''TCONS_00034883,(K06632)''TCONS_00017420,(K03352)''TCONS_00020175,(K03083)''TCONS_00035201,(K06627)''TCONS_00026875,(K13728)''TCONS_00026875,(K13728)''TCONS_00026875,(K13728)''TCONS_00026875,(K13728)''TCONS_00026875,(K13728)''TCONS_00026875,(K13728)''TCONS_00009441,(K04498)''TCONS_00030440,(K03875)''TCONS_00030440,(K03875)''TCONS_00030440,(K03875)''TCONS_00005809,(K02608)…
Cellular Processes	09143 Cell growth and death	Cell cycle - yeast [PATH:ko04111]	129	'TCONS_00017420,(K03352)''TCONS_00002580,(K04354)''TCONS_00002580,(K04354)''TCONS_00002580,(K04354)''TCONS_00002580,(K04354)''TCONS_00002580,(K04354)''TCONS_00005809,(K02608)''TCONS_00005809,(K02608)''TCONS_00016751,(K02180)''TCONS_00002580,(K04354)''TCONS_00002580,(K04354)''TCONS_00016751,(K02180)''TCONS_00018315,(K03353)''TCONS_00018315,(K03353)''TCONS_00018315,(K03353)''TCONS_00021927,(K02606)…
Cellular Processes	09143 Cell growth and death	Oocyte meiosis [PATH:ko04114]	107	'TCONS_00017420,(K03352)''TCONS_00026875,(K13728)''TCONS_00026875,(K13728)''TCONS_00026875,(K13728)''TCONS_00026875,(K13728)''TCONS_00026875,(K13728)''TCONS_00026875,(K13728)''TCONS_00007304,(K12456)''TCONS_00018315,(K03353)''TCONS_00018315,(K03353)''TCONS_00018315,(K03353)''TCONS_00024719,(K03349)''TCONS_00024719,(K03349)''TCONS_00024719,(K03349)''TCONS_00024719,(K03349)''TCONS_00016138,(K03357)…
Cellular Processes	09143 Cell growth and death	Meiosis - yeast [PATH:ko04113]	100	'TCONS_00017420,(K03352)''TCONS_00005809,(K02608)''TCONS_00005809,(K02608)''TCONS_00032491,(K07203)''TCONS_00032491,(K07203)''TCONS_00032491,(K07203)''TCONS_00018315,(K03353)''TCONS_00018315,(K03353)''TCONS_00018315,(K03353)''TCONS_00021927,(K02606)''TCONS_00024719,(K03349)''TCONS_00024719,(K03349)''TCONS_00024719,(K03349)''TCONS_00024719,(K03349)''TCONS_00005351,(K02209)''TCONS_00033684,(K02212)…
Cellular Processes	09143 Cell growth and death	Cellular senescence [PATH:ko04218]	99	'TCONS_00029869,(K20858)''TCONS_00035201,(K06627)''TCONS_00035201,(K06627)''TCONS_00035201,(K06627)''TCONS_00035201,(K06627)''TCONS_00035201,(K06627)''TCONS_00008850,(K06620)''TCONS_00032491,(K07203)''TCONS_00032491,(K07203)''TCONS_00032491,(K07203)''TCONS_00029869,(K20858)''TCONS_00035201,(K06627)''TCONS_00035201,(K06627)''TCONS_00008190,(K05864)''TCONS_00008190,(K05864)''TCONS_00008190,(K05864)…
Cellular Processes	09143 Cell growth and death	Necroptosis [PATH:ko04217]	88	'TCONS_00034687,(K12192)''TCONS_00012697,(K12197)''TCONS_00012697,(K12197)''TCONS_00011215,(K11251)''TCONS_00011215,(K11251)''TCONS_00002080,(K12191)''TCONS_00002080,(K12191)''TCONS_00008190,(K05864)''TCONS_00008190,(K05864)''TCONS_00008190,(K05864)''TCONS_00008190,(K05864)''TCONS_00008190,(K05864)''TCONS_00026984,(K12196)''TCONS_00026984,(K12196)''TCONS_00025547,(K12198)''TCONS_00018011,(K10802)…
Cellular Processes	09143 Cell growth and death	p53 signaling pathway [PATH:ko04115]	35	'TCONS_00002421,(K10143)''TCONS_00002421,(K10143)''TCONS_00002421,(K10143)''TCONS_00002421,(K10143)''TCONS_00002421,(K10143)''TCONS_00002421,(K10143)''TCONS_00028168,(K01110)''TCONS_00028168,(K01110)''TCONS_00000117,(K04728)''TCONS_00000117,(K04728)''TCONS_00000117,(K04728)''TCONS_00000117,(K04728)''TCONS_00000117,(K04728)''TCONS_00000117,(K04728)''TCONS_00000117,(K04728)''TCONS_00019956,(K04506)…
Cellular Processes	09143 Cell growth and death	Ferroptosis [PATH:ko04216]	32	'TCONS_00008212,(K01897)''TCONS_00008212,(K01897)''TCONS_00008212,(K01897)''TCONS_00008212,(K01897)''TCONS_00008212,(K01897)''TCONS_00008212,(K01897)''TCONS_00008212,(K01897)''TCONS_00008212,(K01897)''TCONS_00008212,(K01897)''TCONS_00008212,(K01897)''TCONS_00008212,(K01897)''TCONS_00008212,(K01897)''TCONS_00008212,(K01897)''TCONS_00008212,(K01897)''TCONS_00008212,(K01897)''TCONS_00008212,(K01897)…
Cellular Processes	09143 Cell growth and death	Cell cycle - Caulobacter [PATH:ko04112]	31	'TCONS_00019017,(K01358)''TCONS_00019017,(K01358)''TCONS_00019017,(K01358)''TCONS_00019017,(K01358)''TCONS_00019017,(K01358)''TCONS_00019017,(K01358)''TCONS_00025855,(K03544)''TCONS_00025855,(K03544)''TCONS_00019017,(K01358)''TCONS_00019017,(K01358)''TCONS_00019017,(K01358)''TCONS_00019017,(K01358)''TCONS_00019017,(K01358)''TCONS_00019017,(K01358)''TCONS_00012109,(K03531)''TCONS_00012109,(K03531)…
Cellular Processes	09143 Cell growth and death	Apoptosis [PATH:ko04210]	29	'TCONS_00016186,(K01363)''TCONS_00016186,(K01363)''TCONS_00028072,(K08852)''TCONS_00028072,(K08852)''TCONS_00028072,(K08852)''TCONS_00014876,(K10798)''TCONS_00032717,(K03237)''TCONS_00004640,(K01366)''TCONS_00000117,(K04728)''TCONS_00000117,(K04728)''TCONS_00000117,(K04728)''TCONS_00000117,(K04728)''TCONS_00000117,(K04728)''TCONS_00000117,(K04728)''TCONS_00000117,(K04728)''TCONS_00023117,(K01373)…
Cellular Processes	09143 Cell growth and death	Apoptosis - fly [PATH:ko04214]	21	'TCONS_00000542,(K01527)''TCONS_00000542,(K01527)''TCONS_00000542,(K01527)''TCONS_00000117,(K04728)''TCONS_00000117,(K04728)''TCONS_00000117,(K04728)''TCONS_00000117,(K04728)''TCONS_00000117,(K04728)''TCONS_00000117,(K04728)''TCONS_00000117,(K04728)''TCONS_00034830,(K07870)''TCONS_00017648,(K17065)''TCONS_00017648,(K17065)''TCONS_00017648,(K17065)''TCONS_00017648,(K17065)''TCONS_00017648,(K17065)…
Cellular Processes	09143 Cell growth and death	Apoptosis - multiple species [PATH:ko04215]	5	'TCONS_00029643,(K08334)''TCONS_00029643,(K08334)''TCONS_00029643,(K08334)''TCONS_00029643,(K08334)''TCONS_00029643,(K08334)'
Cellular Processes	09144 Cellular community - eukaryotes	Tight junction [PATH:ko04530]	69	'TCONS_00014869,(K09489)''TCONS_00014869,(K09489)''TCONS_00014869,(K09489)''TCONS_00025202,(K18584)''TCONS_00002580,(K04354)''TCONS_00002580,(K04354)''TCONS_00002580,(K04354)''TCONS_00002580,(K04354)''TCONS_00002580,(K04354)''TCONS_00002580,(K04354)''TCONS_00002580,(K04354)''TCONS_00014869,(K09489)''TCONS_00013249,(K04392)''TCONS_00013249,(K04392)''TCONS_00014869,(K09489)''TCONS_00023546,(K07198)…
Cellular Processes	09144 Cellular community - eukaryotes	Focal adhesion [PATH:ko04510]	54	'TCONS_00020175,(K03083)''TCONS_00020349,(K00889)''TCONS_00020349,(K00889)''TCONS_00020349,(K00889)''TCONS_00020349,(K00889)''TCONS_00020349,(K00889)''TCONS_00020349,(K00889)''TCONS_00020349,(K00889)''TCONS_00020349,(K00889)''TCONS_00020349,(K00889)''TCONS_00020349,(K00889)''TCONS_00020349,(K00889)''TCONS_00020349,(K00889)''TCONS_00020349,(K00889)''TCONS_00020349,(K00889)''TCONS_00020349,(K00889)…
Cellular Processes	09144 Cellular community - eukaryotes	Adherens junction [PATH:ko04520]	22	'TCONS_00009441,(K04498)''TCONS_00013249,(K04392)''TCONS_00013249,(K04392)''TCONS_00031310,(K03097)''TCONS_00031310,(K03097)''TCONS_00007989,(K03115)''TCONS_00007989,(K03115)''TCONS_00013249,(K04392)''TCONS_00013249,(K04392)''TCONS_00013249,(K04392)''TCONS_00007989,(K03115)''TCONS_00031310,(K03097)''TCONS_00031310,(K03097)''TCONS_00005641,(K06085)''TCONS_00013249,(K04392)''TCONS_00013249,(K04392)…
Cellular Processes	09144 Cellular community - eukaryotes	Gap junction [PATH:ko04540]	12	'TCONS_00004838,(K07375)''TCONS_00004838,(K07375)''TCONS_00012623,(K07374)''TCONS_00004838,(K07375)''TCONS_00004838,(K07375)''TCONS_00004838,(K07375)''TCONS_00004838,(K07375)''TCONS_00005180,(K04368)''TCONS_00005180,(K04368)''TCONS_00010233,(K07376)''TCONS_00004838,(K07375)''TCONS_00004838,(K07375)'
Cellular Processes	09144 Cellular community - eukaryotes	Signaling pathways regulating pluripotency of stem cells [PATH:ko04550]	10	'TCONS_00020175,(K03083)''TCONS_00024429,(K14439)''TCONS_00024429,(K14439)''TCONS_00024429,(K14439)''TCONS_00024429,(K14439)''TCONS_00020175,(K03083)''TCONS_00020175,(K03083)''TCONS_00020175,(K03083)''TCONS_00005180,(K04368)''TCONS_00005180,(K04368)'
Cellular Processes	09145 Cellular community - prokaryotes	Quorum sensing [PATH:ko02024]	85	'TCONS_00030094,(K01114)''TCONS_00030094,(K01114)''TCONS_00030094,(K01114)''TCONS_00017271,(K03070)''TCONS_00008595,(K03217)''TCONS_00008595,(K03217)''TCONS_00008595,(K03217)''TCONS_00008595,(K03217)''TCONS_00021171,(K01658)''TCONS_00021171,(K01658)''TCONS_00017906,(K01728)''TCONS_00008212,(K01897)''TCONS_00017906,(K01728)''TCONS_00008212,(K01897)''TCONS_00008212,(K01897)''TCONS_00008212,(K01897)…
Cellular Processes	09145 Cellular community - prokaryotes	Biofilm formation - Escherichia coli [PATH:ko02026]	17	'TCONS_00016030,(K00703)''TCONS_00033837,(K00975)''TCONS_00033837,(K00975)''TCONS_00003471,(K00688)''TCONS_00003471,(K00688)''TCONS_00003471,(K00688)''TCONS_00003471,(K00688)''TCONS_00003471,(K00688)''TCONS_00003471,(K00688)''TCONS_00003471,(K00688)''TCONS_00003471,(K00688)''TCONS_00003471,(K00688)''TCONS_00003471,(K00688)''TCONS_00003471,(K00688)''TCONS_00003471,(K00688)''TCONS_00003471,(K00688)…
Cellular Processes	09145 Cellular community - prokaryotes	Biofilm formation - Pseudomonas aeruginosa [PATH:ko02025]	7	'TCONS_00021171,(K01658)''TCONS_00021171,(K01658)''TCONS_00018357,(K01657)''TCONS_00018357,(K01657)''TCONS_00018357,(K01657)''TCONS_00018357,(K01657)''TCONS_00018357,(K01657)'
Cellular Processes	09145 Cellular community - prokaryotes	Biofilm formation - Vibrio cholerae [PATH:ko05111]	6	'TCONS_00012079,(K00640)''TCONS_00012079,(K00640)''TCONS_00012079,(K00640)''TCONS_00012079,(K00640)''TCONS_00012079,(K00640)''TCONS_00012079,(K00640)'
Environmental Information Processing	09131 Membrane transport	ABC transporters [PATH:ko02010]	49	'TCONS_00007272,(K05658)''TCONS_00007272,(K05658)''TCONS_00011761,(K05674)''TCONS_00011761,(K05674)''TCONS_00011761,(K05674)''TCONS_00007272,(K05658)''TCONS_00007272,(K05658)''TCONS_00007272,(K05658)''TCONS_00007272,(K05658)''TCONS_00007272,(K05658)''TCONS_00019777,(K05643)''TCONS_00019777,(K05643)''TCONS_00019777,(K05643)''TCONS_00019777,(K05643)''TCONS_00019777,(K05643)''TCONS_00007272,(K05658)…
Environmental Information Processing	09131 Membrane transport	Bacterial secretion system [PATH:ko03070]	23	'TCONS_00017271,(K03070)''TCONS_00008595,(K03217)''TCONS_00008595,(K03217)''TCONS_00008595,(K03217)''TCONS_00008595,(K03217)''TCONS_00023041,(K03118)''TCONS_00013874,(K03110)''TCONS_00013874,(K03110)''TCONS_00013874,(K03110)''TCONS_00013874,(K03110)''TCONS_00031039,(K03106)''TCONS_00008595,(K03217)''TCONS_00008595,(K03217)''TCONS_00008595,(K03217)''TCONS_00021619,(K03117)''TCONS_00021619,(K03117)…
Environmental Information Processing	09132 Signal transduction	Plant hormone signal transduction [PATH:ko04075]	387	'TCONS_00010144,(K14496)''TCONS_00029353,(K14432)''TCONS_00029353,(K14432)''TCONS_00029353,(K14432)''TCONS_00029353,(K14432)''TCONS_00029353,(K14432)''TCONS_00029353,(K14432)''TCONS_00029353,(K14432)''TCONS_00029353,(K14432)''TCONS_00026080,(K14497)''TCONS_00003626,(K14431)''TCONS_00003626,(K14431)''TCONS_00003626,(K14431)''TCONS_00005585,(K12126)''TCONS_00018268,(K14498)''TCONS_00018268,(K14498)…
Environmental Information Processing	09132 Signal transduction	MAPK signaling pathway - plant [PATH:ko04016]	214	'TCONS_00010144,(K14496)''TCONS_00026080,(K14497)''TCONS_00002734,(K13447)''TCONS_00002734,(K13447)''TCONS_00018268,(K14498)''TCONS_00018268,(K14498)''TCONS_00018268,(K14498)''TCONS_00018268,(K14498)''TCONS_00018268,(K14498)''TCONS_00018268,(K14498)''TCONS_00018268,(K14498)''TCONS_00018268,(K14498)''TCONS_00018268,(K14498)''TCONS_00018268,(K14498)''TCONS_00018268,(K14498)''TCONS_00018268,(K14498)…
Environmental Information Processing	09132 Signal transduction	Phosphatidylinositol signaling system [PATH:ko04070]	127	'TCONS_00020349,(K00889)''TCONS_00020349,(K00889)''TCONS_00020349,(K00889)''TCONS_00020349,(K00889)''TCONS_00020349,(K00889)''TCONS_00003706,(K01092)''TCONS_00003706,(K01092)''TCONS_00003706,(K01092)''TCONS_00034329,(K00921)''TCONS_00034329,(K00921)''TCONS_00034329,(K00921)''TCONS_00008221,(K00888)''TCONS_00008221,(K00888)''TCONS_00008221,(K00888)''TCONS_00008221,(K00888)''TCONS_00008221,(K00888)…
Environmental Information Processing	09132 Signal transduction	Sphingolipid signaling pathway [PATH:ko04071]	111	'TCONS_00002580,(K04354)''TCONS_00002580,(K04354)''TCONS_00002580,(K04354)''TCONS_00002580,(K04354)''TCONS_00002580,(K04354)''TCONS_00029615,(K01634)''TCONS_00029615,(K01634)''TCONS_00029615,(K01634)''TCONS_00029615,(K01634)''TCONS_00029615,(K01634)''TCONS_00029615,(K01634)''TCONS_00029615,(K01634)''TCONS_00029615,(K01634)''TCONS_00029615,(K01634)''TCONS_00029615,(K01634)''TCONS_00029615,(K01634)…
Environmental Information Processing	09132 Signal transduction	AMPK signaling pathway [PATH:ko04152]	110	'TCONS_00030080,(K01103)''TCONS_00030080,(K01103)''TCONS_00035201,(K06627)''TCONS_00002580,(K04354)''TCONS_00002580,(K04354)''TCONS_00002580,(K04354)''TCONS_00002580,(K04354)''TCONS_00002580,(K04354)''TCONS_00022210,(K11262)''TCONS_00022210,(K11262)''TCONS_00022210,(K11262)''TCONS_00022210,(K11262)''TCONS_00035201,(K06627)''TCONS_00035201,(K06627)''TCONS_00035201,(K06627)''TCONS_00035201,(K06627)…
Environmental Information Processing	09132 Signal transduction	PI3K-Akt signaling pathway [PATH:ko04151]	103	'TCONS_00020175,(K03083)''TCONS_00002580,(K04354)''TCONS_00002580,(K04354)''TCONS_00002580,(K04354)''TCONS_00002580,(K04354)''TCONS_00002580,(K04354)''TCONS_00032491,(K07203)''TCONS_00032491,(K07203)''TCONS_00032491,(K07203)''TCONS_00002580,(K04354)''TCONS_00002580,(K04354)''TCONS_00008065,(K11583)''TCONS_00008065,(K11583)''TCONS_00021233,(K09487)''TCONS_00021233,(K09487)''TCONS_00013249,(K04392)…
Environmental Information Processing	09132 Signal transduction	Phospholipase D signaling pathway [PATH:ko04072]	102	'TCONS_00023436,(K01528)''TCONS_00020349,(K00889)''TCONS_00020349,(K00889)''TCONS_00020349,(K00889)''TCONS_00020349,(K00889)''TCONS_00020349,(K00889)''TCONS_00032491,(K07203)''TCONS_00032491,(K07203)''TCONS_00032491,(K07203)''TCONS_00016210,(K01115)''TCONS_00023436,(K01528)''TCONS_00023436,(K01528)''TCONS_00023436,(K01528)''TCONS_00020349,(K00889)''TCONS_00020349,(K00889)''TCONS_00020349,(K00889)…
Environmental Information Processing	09132 Signal transduction	mTOR signaling pathway [PATH:ko04150]	93	'TCONS_00007154,(K20404)''TCONS_00007154,(K20404)''TCONS_00020175,(K03083)''TCONS_00022112,(K02148)''TCONS_00030440,(K03875)''TCONS_00030440,(K03875)''TCONS_00030440,(K03875)''TCONS_00032491,(K07203)''TCONS_00032491,(K07203)''TCONS_00032491,(K07203)''TCONS_00017286,(K14299)''TCONS_00017286,(K14299)''TCONS_00017286,(K14299)''TCONS_00030440,(K03875)''TCONS_00014937,(K14004)''TCONS_00014937,(K14004)…
Environmental Information Processing	09132 Signal transduction	HIF-1 signaling pathway [PATH:ko04066]	79	'TCONS_00026611,(K00161)''TCONS_00030080,(K01103)''TCONS_00030080,(K01103)''TCONS_00029886,(K00134)''TCONS_00029886,(K00134)''TCONS_00029886,(K00134)''TCONS_00029886,(K00134)''TCONS_00029886,(K00134)''TCONS_00029886,(K00134)''TCONS_00029886,(K00134)''TCONS_00009441,(K04498)''TCONS_00032491,(K07203)''TCONS_00032491,(K07203)''TCONS_00032491,(K07203)''TCONS_00004809,(K00844)''TCONS_00004809,(K00844)…
Environmental Information Processing	09132 Signal transduction	Wnt signaling pathway [PATH:ko04310]	69	'TCONS_00020396,(K04505)''TCONS_00020175,(K03083)''TCONS_00009441,(K04498)''TCONS_00013249,(K04392)''TCONS_00013249,(K04392)''TCONS_00031310,(K03097)''TCONS_00031310,(K03097)''TCONS_00020396,(K04505)''TCONS_00007989,(K03115)''TCONS_00007989,(K03115)''TCONS_00019956,(K04506)''TCONS_00014298,(K03347)''TCONS_00014298,(K03347)''TCONS_00014298,(K03347)''TCONS_00014298,(K03347)''TCONS_00014298,(K03347)…
Environmental Information Processing	09132 Signal transduction	FoxO signaling pathway [PATH:ko04068]	61	'TCONS_00003880,(K11434)''TCONS_00003880,(K11434)''TCONS_00009441,(K04498)''TCONS_00030440,(K03875)''TCONS_00030440,(K03875)''TCONS_00030440,(K03875)''TCONS_00016194,(K08336)''TCONS_00009315,(K08341)''TCONS_00030440,(K03875)''TCONS_00023546,(K07198)''TCONS_00023546,(K07198)''TCONS_00023546,(K07198)''TCONS_00023546,(K07198)''TCONS_00023546,(K07198)''TCONS_00023546,(K07198)''TCONS_00016375,(K11838)…
Environmental Information Processing	09132 Signal transduction	MAPK signaling pathway - yeast [PATH:ko04011]	60	'TCONS_00020349,(K00889)''TCONS_00020349,(K00889)''TCONS_00020349,(K00889)''TCONS_00020349,(K00889)''TCONS_00020349,(K00889)''TCONS_00008221,(K00888)''TCONS_00008221,(K00888)''TCONS_00008221,(K00888)''TCONS_00008221,(K00888)''TCONS_00008221,(K00888)''TCONS_00020349,(K00889)''TCONS_00020349,(K00889)''TCONS_00020349,(K00889)''TCONS_00020349,(K00889)''TCONS_00020349,(K00889)''TCONS_00020349,(K00889)…
Environmental Information Processing	09132 Signal transduction	cAMP signaling pathway [PATH:ko04024]	58	'TCONS_00009294,(K00232)''TCONS_00009441,(K04498)''TCONS_00016210,(K01115)''TCONS_00013249,(K04392)''TCONS_00013249,(K04392)''TCONS_00009294,(K00232)''TCONS_00024248,(K06269)''TCONS_00024248,(K06269)''TCONS_00024248,(K06269)''TCONS_00024248,(K06269)''TCONS_00024248,(K06269)''TCONS_00024248,(K06269)''TCONS_00016210,(K01115)''TCONS_00016210,(K01115)''TCONS_00016210,(K01115)''TCONS_00016210,(K01115)…
Environmental Information Processing	09132 Signal transduction	Apelin signaling pathway [PATH:ko04371]	58	'TCONS_00032491,(K07203)''TCONS_00032491,(K07203)''TCONS_00032491,(K07203)''TCONS_00009315,(K08341)''TCONS_00023546,(K07198)''TCONS_00023546,(K07198)''TCONS_00023546,(K07198)''TCONS_00023546,(K07198)''TCONS_00023546,(K07198)''TCONS_00023546,(K07198)''TCONS_00000155,(K04688)''TCONS_00000155,(K04688)''TCONS_00000155,(K04688)''TCONS_00000155,(K04688)''TCONS_00009315,(K08341)''TCONS_00029643,(K08334)…
Environmental Information Processing	09132 Signal transduction	Ras signaling pathway [PATH:ko04014]	53	'TCONS_00032877,(K17637)''TCONS_00016210,(K01115)''TCONS_00032877,(K17637)''TCONS_00032877,(K17637)''TCONS_00004018,(K01047)''TCONS_00013249,(K04392)''TCONS_00013249,(K04392)''TCONS_00016210,(K01115)''TCONS_00016210,(K01115)''TCONS_00016210,(K01115)''TCONS_00016210,(K01115)''TCONS_00016210,(K01115)''TCONS_00016210,(K01115)''TCONS_00016210,(K01115)''TCONS_00016210,(K01115)''TCONS_00016210,(K01115)…
Environmental Information Processing	09132 Signal transduction	MAPK signaling pathway - fly [PATH:ko04013]	48	'TCONS_00020239,(K06689)''TCONS_00020239,(K06689)''TCONS_00020239,(K06689)''TCONS_00013249,(K04392)''TCONS_00013249,(K04392)''TCONS_00006380,(K20223)''TCONS_00019956,(K04506)''TCONS_00019947,(K04382)''TCONS_00019947,(K04382)''TCONS_00006380,(K20223)''TCONS_00006380,(K20223)''TCONS_00019956,(K04506)''TCONS_00019956,(K04506)''TCONS_00019956,(K04506)''TCONS_00019956,(K04506)''TCONS_00013249,(K04392)…
Environmental Information Processing	09132 Signal transduction	Calcium signaling pathway [PATH:ko04020]	47	'TCONS_00029869,(K20858)''TCONS_00029869,(K20858)''TCONS_00029869,(K20858)''TCONS_00029869,(K20858)''TCONS_00029869,(K20858)''TCONS_00029869,(K20858)''TCONS_00004236,(K05857)''TCONS_00004236,(K05857)''TCONS_00004236,(K05857)''TCONS_00004236,(K05857)''TCONS_00004236,(K05857)''TCONS_00004236,(K05857)''TCONS_00013401,(K06268)''TCONS_00013401,(K06268)''TCONS_00028641,(K04718)''TCONS_00028641,(K04718)…
Environmental Information Processing	09132 Signal transduction	Hedgehog signaling pathway - fly [PATH:ko04341]	41	'TCONS_00020175,(K03083)''TCONS_00027531,(K10523)''TCONS_00027531,(K10523)''TCONS_00027531,(K10523)''TCONS_00027531,(K10523)''TCONS_00027531,(K10523)''TCONS_00027531,(K10523)''TCONS_00027531,(K10523)''TCONS_00027531,(K10523)''TCONS_00016039,(K03869)''TCONS_00016039,(K03869)''TCONS_00001084,(K06228)''TCONS_00001084,(K06228)''TCONS_00001084,(K06228)''TCONS_00027531,(K10523)''TCONS_00027531,(K10523)…
Environmental Information Processing	09132 Signal transduction	MAPK signaling pathway [PATH:ko04010]	41	'TCONS_00030794,(K04459)''TCONS_00013249,(K04392)''TCONS_00013249,(K04392)''TCONS_00024851,(K03283)''TCONS_00013401,(K06268)''TCONS_00013401,(K06268)''TCONS_00013249,(K04392)''TCONS_00013249,(K04392)''TCONS_00013249,(K04392)''TCONS_00013401,(K06268)''TCONS_00024851,(K03283)''TCONS_00024858,(K04460)''TCONS_00013401,(K06268)''TCONS_00013401,(K06268)''TCONS_00013401,(K06268)''TCONS_00005180,(K04368)…
Environmental Information Processing	09132 Signal transduction	Two-component system [PATH:ko02020]	40	'TCONS_00025204,(K01179)''TCONS_00006088,(K01051)''TCONS_00006088,(K01051)''TCONS_00006088,(K01051)''TCONS_00006088,(K01051)''TCONS_00006088,(K01051)''TCONS_00006088,(K01051)''TCONS_00006088,(K01051)''TCONS_00006088,(K01051)''TCONS_00006088,(K01051)''TCONS_00006088,(K01051)''TCONS_00006088,(K01051)''TCONS_00006088,(K01051)''TCONS_00006088,(K01051)''TCONS_00006088,(K01051)''TCONS_00001137,(K00626)…
Environmental Information Processing	09132 Signal transduction	cGMP-PKG signaling pathway [PATH:ko04022]	38	'TCONS_00024248,(K06269)''TCONS_00024248,(K06269)''TCONS_00024248,(K06269)''TCONS_00024248,(K06269)''TCONS_00024248,(K06269)''TCONS_00024248,(K06269)''TCONS_00013401,(K06268)''TCONS_00013401,(K06268)''TCONS_00032370,(K05863)''TCONS_00013401,(K06268)''TCONS_00032370,(K05863)''TCONS_00032370,(K05863)''TCONS_00032370,(K05863)''TCONS_00013401,(K06268)''TCONS_00013401,(K06268)''TCONS_00013401,(K06268)…
Environmental Information Processing	09132 Signal transduction	Hippo signaling pathway [PATH:ko04390]	36	'TCONS_00020175,(K03083)''TCONS_00002580,(K04354)''TCONS_00002580,(K04354)''TCONS_00002580,(K04354)''TCONS_00002580,(K04354)''TCONS_00002580,(K04354)''TCONS_00002580,(K04354)''TCONS_00002580,(K04354)''TCONS_00024248,(K06269)''TCONS_00024248,(K06269)''TCONS_00024248,(K06269)''TCONS_00024248,(K06269)''TCONS_00024248,(K06269)''TCONS_00024248,(K06269)''TCONS_00012989,(K06630)''TCONS_00025440,(K03456)…
Environmental Information Processing	09132 Signal transduction	VEGF signaling pathway [PATH:ko04370]	34	'TCONS_00013249,(K04392)''TCONS_00013249,(K04392)''TCONS_00013401,(K06268)''TCONS_00013401,(K06268)''TCONS_00028641,(K04718)''TCONS_00028641,(K04718)''TCONS_00028641,(K04718)''TCONS_00028641,(K04718)''TCONS_00028641,(K04718)''TCONS_00013249,(K04392)''TCONS_00013249,(K04392)''TCONS_00013249,(K04392)''TCONS_00013401,(K06268)''TCONS_00013401,(K06268)''TCONS_00013401,(K06268)''TCONS_00013401,(K06268)…
Environmental Information Processing	09132 Signal transduction	Hedgehog signaling pathway [PATH:ko04340]	32	'TCONS_00020175,(K03083)''TCONS_00027531,(K10523)''TCONS_00027531,(K10523)''TCONS_00027531,(K10523)''TCONS_00027531,(K10523)''TCONS_00027531,(K10523)''TCONS_00027531,(K10523)''TCONS_00027531,(K10523)''TCONS_00027531,(K10523)''TCONS_00016039,(K03869)''TCONS_00016039,(K03869)''TCONS_00027531,(K10523)''TCONS_00027531,(K10523)''TCONS_00027531,(K10523)''TCONS_00027531,(K10523)''TCONS_00027531,(K10523)…
Environmental Information Processing	09132 Signal transduction	Hippo signaling pathway - fly [PATH:ko04391]	31	'TCONS_00002580,(K04354)''TCONS_00002580,(K04354)''TCONS_00002580,(K04354)''TCONS_00002580,(K04354)''TCONS_00002580,(K04354)''TCONS_00002580,(K04354)''TCONS_00002580,(K04354)''TCONS_00012989,(K06630)''TCONS_00025440,(K03456)''TCONS_00025440,(K03456)''TCONS_00015009,(K16675)''TCONS_00015009,(K16675)''TCONS_00015009,(K16675)''TCONS_00015009,(K16675)''TCONS_00019947,(K04382)''TCONS_00019947,(K04382)…
Environmental Information Processing	09132 Signal transduction	TGF-beta signaling pathway [PATH:ko04350]	27	'TCONS_00009441,(K04498)''TCONS_00000155,(K04688)''TCONS_00000155,(K04688)''TCONS_00000155,(K04688)''TCONS_00000155,(K04688)''TCONS_00025440,(K03456)''TCONS_00025440,(K03456)''TCONS_00019947,(K04382)''TCONS_00019947,(K04382)''TCONS_00014298,(K03347)''TCONS_00014298,(K03347)''TCONS_00014298,(K03347)''TCONS_00014298,(K03347)''TCONS_00014298,(K03347)''TCONS_00004641,(K03868)''TCONS_00004641,(K03868)…
Environmental Information Processing	09132 Signal transduction	Notch signaling pathway [PATH:ko04330]	24	'TCONS_00020396,(K04505)''TCONS_00009441,(K04498)''TCONS_00007402,(K06063)''TCONS_00007402,(K06063)''TCONS_00007402,(K06063)''TCONS_00007402,(K06063)''TCONS_00007402,(K06063)''TCONS_00020396,(K04505)''TCONS_00026965,(K06067)''TCONS_00026965,(K06067)''TCONS_00026965,(K06067)''TCONS_00026965,(K06067)''TCONS_00026965,(K06067)''TCONS_00014571,(K06171)''TCONS_00014571,(K06171)''TCONS_00031980,(K06062)…
Environmental Information Processing	09132 Signal transduction	Rap1 signaling pathway [PATH:ko04015]	19	'TCONS_00013249,(K04392)''TCONS_00013249,(K04392)''TCONS_00013249,(K04392)''TCONS_00013249,(K04392)''TCONS_00013249,(K04392)''TCONS_00005180,(K04368)''TCONS_00005180,(K04368)''TCONS_00018117,(K02183)''TCONS_00005179,(K05759)''TCONS_00005179,(K05759)''TCONS_00013249,(K04392)''TCONS_00013249,(K04392)''TCONS_00013249,(K04392)''TCONS_00013249,(K04392)''TCONS_00013249,(K04392)''TCONS_00013249,(K04392)…
Environmental Information Processing	09132 Signal transduction	NF-kappa B signaling pathway [PATH:ko04064]	18	'TCONS_00031310,(K03097)''TCONS_00031310,(K03097)''TCONS_00007989,(K03115)''TCONS_00007989,(K03115)''TCONS_00000117,(K04728)''TCONS_00000117,(K04728)''TCONS_00000117,(K04728)''TCONS_00000117,(K04728)''TCONS_00000117,(K04728)''TCONS_00000117,(K04728)''TCONS_00000117,(K04728)''TCONS_00007267,(K10577)''TCONS_00007267,(K10577)''TCONS_00007989,(K03115)''TCONS_00031310,(K03097)''TCONS_00031310,(K03097)…
Environmental Information Processing	09132 Signal transduction	ErbB signaling pathway [PATH:ko04012]	13	'TCONS_00020175,(K03083)''TCONS_00032491,(K07203)''TCONS_00032491,(K07203)''TCONS_00032491,(K07203)''TCONS_00000155,(K04688)''TCONS_00000155,(K04688)''TCONS_00000155,(K04688)''TCONS_00000155,(K04688)''TCONS_00020175,(K03083)''TCONS_00020175,(K03083)''TCONS_00020175,(K03083)''TCONS_00005180,(K04368)''TCONS_00005180,(K04368)'
Environmental Information Processing	09132 Signal transduction	TNF signaling pathway [PATH:ko04668]	10	'TCONS_00017648,(K17065)''TCONS_00017648,(K17065)''TCONS_00017648,(K17065)''TCONS_00017648,(K17065)''TCONS_00017648,(K17065)''TCONS_00017648,(K17065)''TCONS_00005180,(K04368)''TCONS_00005180,(K04368)''TCONS_00024716,(K02580)''TCONS_00024716,(K02580)'
Environmental Information Processing	09132 Signal transduction	JAK-STAT signaling pathway [PATH:ko04630]	5	'TCONS_00009441,(K04498)''TCONS_00032491,(K07203)''TCONS_00032491,(K07203)''TCONS_00032491,(K07203)''TCONS_00021441,(K04706)'
Environmental Information Processing	09132 Signal transduction	Hippo signaling pathway - multiple species [PATH:ko04392]	5	'TCONS_00012664,(K02218)''TCONS_00021614,(K06685)''TCONS_00012664,(K02218)''TCONS_00021614,(K06685)''TCONS_00021614,(K06685)'
Genetic Information Processing	09121 Transcription	Spliceosome [PATH:ko03040]	368	'TCONS_00034900,(K12890)''TCONS_00034900,(K12890)''TCONS_00034900,(K12890)''TCONS_00034900,(K12890)''TCONS_00034900,(K12890)''TCONS_00035063,(K12621)''TCONS_00035063,(K12621)''TCONS_00005355,(K12852)''TCONS_00000343,(K11094)''TCONS_00004242,(K12834)''TCONS_00004242,(K12834)''TCONS_00034900,(K12890)''TCONS_00034900,(K12890)''TCONS_00034900,(K12890)''TCONS_00034900,(K12890)''TCONS_00034900,(K12890)…
Genetic Information Processing	09121 Transcription	Basal transcription factors [PATH:ko03022]	109	'TCONS_00034954,(K03127)''TCONS_00033134,(K10844)''TCONS_00033134,(K10844)''TCONS_00033134,(K10844)''TCONS_00033134,(K10844)''TCONS_00009872,(K03131)''TCONS_00009872,(K03131)''TCONS_00009872,(K03131)''TCONS_00009872,(K03131)''TCONS_00009872,(K03131)''TCONS_00009872,(K03131)''TCONS_00009872,(K03131)''TCONS_00009872,(K03131)''TCONS_00024090,(K03142)''TCONS_00024090,(K03142)''TCONS_00024090,(K03142)…
Genetic Information Processing	09121 Transcription	RNA polymerase [PATH:ko03020]	87	'TCONS_00009142,(K03007)''TCONS_00027556,(K03002)''TCONS_00016956,(K03016)''TCONS_00016956,(K03016)''TCONS_00009142,(K03007)''TCONS_00007923,(K03011)''TCONS_00007923,(K03011)''TCONS_00007923,(K03011)''TCONS_00010672,(K03017)''TCONS_00033044,(K03013)''TCONS_00033044,(K03013)''TCONS_00033044,(K03013)''TCONS_00015294,(K03008)''TCONS_00033044,(K03013)''TCONS_00033044,(K03013)''TCONS_00015854,(K02999)…
Genetic Information Processing	09122 Translation	RNA transport [PATH:ko03013]	309	'TCONS_00032832,(K03537)''TCONS_00032832,(K03537)''TCONS_00032832,(K03537)''TCONS_00009404,(K14297)''TCONS_00009404,(K14297)''TCONS_00009404,(K14297)''TCONS_00019166,(K03247)''TCONS_00022276,(K14294)''TCONS_00022276,(K14294)''TCONS_00022276,(K14294)''TCONS_00022276,(K14294)''TCONS_00022276,(K14294)''TCONS_00022276,(K14294)''TCONS_00022276,(K14294)''TCONS_00022276,(K14294)''TCONS_00022276,(K14294)…
Genetic Information Processing	09122 Translation	Ribosome [PATH:ko03010]	276	'TCONS_00027072,(K02963)''TCONS_00027320,(K02990)''TCONS_00027320,(K02990)''TCONS_00006293,(K02897)''TCONS_00005931,(K02894)''TCONS_00005931,(K02894)''TCONS_00005931,(K02894)''TCONS_00033902,(K02933)''TCONS_00018340,(K02917)''TCONS_00018340,(K02917)''TCONS_00001623,(K02957)''TCONS_00001623,(K02957)''TCONS_00015796,(K02889)''TCONS_00015796,(K02889)''TCONS_00015796,(K02889)''TCONS_00015796,(K02889)…
Genetic Information Processing	09122 Translation	mRNA surveillance pathway [PATH:ko03015]	236	'TCONS_00022276,(K14294)''TCONS_00022276,(K14294)''TCONS_00022276,(K14294)''TCONS_00022276,(K14294)''TCONS_00022276,(K14294)''TCONS_00022276,(K14294)''TCONS_00022276,(K14294)''TCONS_00022276,(K14294)''TCONS_00022276,(K14294)''TCONS_00022276,(K14294)''TCONS_00022708,(K18723)''TCONS_00022708,(K18723)''TCONS_00022708,(K18723)''TCONS_00018406,(K14325)''TCONS_00018406,(K14325)''TCONS_00002580,(K04354)…
Genetic Information Processing	09122 Translation	Ribosome biogenesis in eukaryotes [PATH:ko03008]	156	'TCONS_00032832,(K03537)''TCONS_00032832,(K03537)''TCONS_00032832,(K03537)''TCONS_00001160,(K14539)''TCONS_00001160,(K14539)''TCONS_00001160,(K14539)''TCONS_00001160,(K14539)''TCONS_00004511,(K14521)''TCONS_00004511,(K14521)''TCONS_00004511,(K14521)''TCONS_00004511,(K14521)''TCONS_00004511,(K14521)''TCONS_00016831,(K14558)''TCONS_00016831,(K14558)''TCONS_00006547,(K06943)''TCONS_00024723,(K12619)…
Genetic Information Processing	09122 Translation	Aminoacyl-tRNA biosynthesis [PATH:ko00970]	118	'TCONS_00000946,(K01869)''TCONS_00000946,(K01869)''TCONS_00000946,(K01869)''TCONS_00000946,(K01869)''TCONS_00013006,(K01875)''TCONS_00013006,(K01875)''TCONS_00013006,(K01875)''TCONS_00024137,(K01873)''TCONS_00024137,(K01873)''TCONS_00005721,(K01880)''TCONS_00015241,(K01872)''TCONS_00015241,(K01872)''TCONS_00002754,(K01890)''TCONS_00002754,(K01890)''TCONS_00020965,(K01868)''TCONS_00020965,(K01868)…
Genetic Information Processing	09123 Folding, sorting and degradation	Protein processing in endoplasmic reticulum [PATH:ko04141]	275	'TCONS_00027031,(K09584)''TCONS_00016932,(K08057)''TCONS_00016932,(K08057)''TCONS_00011632,(K04554)''TCONS_00011632,(K04554)''TCONS_00003103,(K14026)''TCONS_00003103,(K14026)''TCONS_00002626,(K10084)''TCONS_00002626,(K10084)''TCONS_00002626,(K10084)''TCONS_00002626,(K10084)''TCONS_00002626,(K10084)''TCONS_00002626,(K10084)''TCONS_00002626,(K10084)''TCONS_00002626,(K10084)''TCONS_00002626,(K10084)…
Genetic Information Processing	09123 Folding, sorting and degradation	Ubiquitin mediated proteolysis [PATH:ko04120]	221	'TCONS_00017420,(K03352)''TCONS_00011632,(K04554)''TCONS_00011632,(K04554)''TCONS_00030440,(K03875)''TCONS_00030440,(K03875)''TCONS_00030440,(K03875)''TCONS_00016039,(K03869)''TCONS_00016039,(K03869)''TCONS_00006800,(K10592)''TCONS_00006800,(K10592)''TCONS_00006800,(K10592)''TCONS_00006800,(K10592)''TCONS_00006800,(K10592)''TCONS_00006800,(K10592)''TCONS_00006800,(K10592)''TCONS_00006800,(K10592)…
Genetic Information Processing	09123 Folding, sorting and degradation	RNA degradation [PATH:ko03018]	201	'TCONS_00035063,(K12621)''TCONS_00035063,(K12621)''TCONS_00035593,(K03679)''TCONS_00035593,(K03679)''TCONS_00035593,(K03679)''TCONS_00035593,(K03679)''TCONS_00034684,(K12608)''TCONS_00034684,(K12608)''TCONS_00008310,(K12581)''TCONS_00027998,(K12611)''TCONS_00026396,(K12622)''TCONS_00026341,(K13126)''TCONS_00018901,(K12603)''TCONS_00018901,(K12603)''TCONS_00018901,(K12603)''TCONS_00018901,(K12603)…
Genetic Information Processing	09123 Folding, sorting and degradation	Protein export [PATH:ko03060]	95	'TCONS_00008754,(K03100)''TCONS_00008754,(K03100)''TCONS_00008754,(K03100)''TCONS_00008754,(K03100)''TCONS_00017271,(K03070)''TCONS_00008595,(K03217)''TCONS_00008595,(K03217)''TCONS_00008595,(K03217)''TCONS_00008595,(K03217)''TCONS_00020162,(K03105)''TCONS_00020162,(K03105)''TCONS_00014537,(K09540)''TCONS_00014537,(K09540)''TCONS_00014537,(K09540)''TCONS_00014537,(K09540)''TCONS_00014537,(K09540)…
Genetic Information Processing	09123 Folding, sorting and degradation	SNARE interactions in vesicular transport [PATH:ko04130]	54	'TCONS_00019856,(K08486)''TCONS_00014498,(K08517)''TCONS_00014498,(K08517)''TCONS_00014498,(K08517)''TCONS_00014498,(K08517)''TCONS_00014498,(K08517)''TCONS_00016883,(K08495)''TCONS_00032603,(K08503)''TCONS_00024234,(K08493)''TCONS_00026098,(K08492)''TCONS_00026098,(K08492)''TCONS_00026098,(K08492)''TCONS_00032603,(K08503)''TCONS_00019839,(K08496)''TCONS_00019839,(K08496)''TCONS_00016883,(K08495)…
Genetic Information Processing	09123 Folding, sorting and degradation	Proteasome [PATH:ko03050]	54	'TCONS_00027522,(K02735)''TCONS_00027522,(K02735)''TCONS_00027117,(K03036)''TCONS_00027117,(K03036)''TCONS_00008821,(K03064)''TCONS_00008821,(K03064)''TCONS_00030278,(K02736)''TCONS_00017318,(K03031)''TCONS_00005050,(K02726)''TCONS_00011492,(K03062)''TCONS_00033874,(K03028)''TCONS_00007832,(K06691)''TCONS_00007832,(K06691)''TCONS_00007832,(K06691)''TCONS_00005875,(K03032)''TCONS_00001909,(K03065)…
Genetic Information Processing	09123 Folding, sorting and degradation	Sulfur relay system [PATH:ko04122]	31	'TCONS_00032938,(K03637)''TCONS_00032938,(K03637)''TCONS_00032938,(K03637)''TCONS_00032938,(K03637)''TCONS_00032938,(K03637)''TCONS_00032938,(K03637)''TCONS_00010968,(K01011)''TCONS_00010968,(K01011)''TCONS_00033407,(K03639)''TCONS_00033407,(K03639)''TCONS_00033407,(K03639)''TCONS_00033407,(K03639)''TCONS_00033407,(K03639)''TCONS_00033407,(K03639)''TCONS_00033407,(K03639)''TCONS_00033407,(K03639)…
Genetic Information Processing	09124 Replication and repair	Nucleotide excision repair [PATH:ko03420]	115	'TCONS_00009197,(K02335)''TCONS_00033134,(K10844)''TCONS_00033134,(K10844)''TCONS_00033134,(K10844)''TCONS_00033134,(K10844)''TCONS_00024090,(K03142)''TCONS_00024090,(K03142)''TCONS_00024090,(K03142)''TCONS_00029940,(K10747)''TCONS_00029940,(K10747)''TCONS_00029940,(K10747)''TCONS_00029940,(K10747)''TCONS_00026972,(K02324)''TCONS_00026972,(K02324)''TCONS_00007842,(K03143)''TCONS_00007842,(K03143)…
Genetic Information Processing	09124 Replication and repair	Homologous recombination [PATH:ko03440]	99	'TCONS_00009197,(K02335)''TCONS_00011457,(K10683)''TCONS_00030311,(K10871)''TCONS_00030311,(K10871)''TCONS_00030311,(K10871)''TCONS_00014650,(K10901)''TCONS_00009197,(K02335)''TCONS_00009197,(K02335)''TCONS_00009197,(K02335)''TCONS_00011303,(K03553)''TCONS_00011303,(K03553)''TCONS_00011303,(K03553)''TCONS_00011303,(K03553)''TCONS_00011303,(K03553)''TCONS_00035457,(K03655)''TCONS_00035457,(K03655)…
Genetic Information Processing	09124 Replication and repair	Fanconi anemia pathway [PATH:ko03460]	81	'TCONS_00014650,(K10901)''TCONS_00025932,(K15363)''TCONS_00025932,(K15363)''TCONS_00007633,(K02350)''TCONS_00007633,(K02350)''TCONS_00007633,(K02350)''TCONS_00007633,(K02350)''TCONS_00005115,(K07466)''TCONS_00005115,(K07466)''TCONS_00005115,(K07466)''TCONS_00028076,(K10882)''TCONS_00016430,(K10739)''TCONS_00014422,(K03165)''TCONS_00014422,(K03165)''TCONS_00013931,(K10870)''TCONS_00016430,(K10739)…
Genetic Information Processing	09124 Replication and repair	DNA replication [PATH:ko03030]	70	'TCONS_00009197,(K02335)''TCONS_00029940,(K10747)''TCONS_00029940,(K10747)''TCONS_00029940,(K10747)''TCONS_00029940,(K10747)''TCONS_00026972,(K02324)''TCONS_00026972,(K02324)''TCONS_00020326,(K10755)''TCONS_00020326,(K10755)''TCONS_00009197,(K02335)''TCONS_00009197,(K02335)''TCONS_00009197,(K02335)''TCONS_00020326,(K10755)''TCONS_00020326,(K10755)''TCONS_00020326,(K10755)''TCONS_00026597,(K02685)…
Genetic Information Processing	09124 Replication and repair	Base excision repair [PATH:ko03410]	68	'TCONS_00009197,(K02335)''TCONS_00029940,(K10747)''TCONS_00029940,(K10747)''TCONS_00029940,(K10747)''TCONS_00029940,(K10747)''TCONS_00026972,(K02324)''TCONS_00026972,(K02324)''TCONS_00025287,(K03512)''TCONS_00025287,(K03512)''TCONS_00027520,(K03660)''TCONS_00027520,(K03660)''TCONS_00009197,(K02335)''TCONS_00009197,(K02335)''TCONS_00009197,(K02335)''TCONS_00016871,(K10563)''TCONS_00016871,(K10563)…
Genetic Information Processing	09124 Replication and repair	Mismatch repair [PATH:ko03430]	56	'TCONS_00029940,(K10747)''TCONS_00029940,(K10747)''TCONS_00029940,(K10747)''TCONS_00029940,(K10747)''TCONS_00020326,(K10755)''TCONS_00020326,(K10755)''TCONS_00000500,(K10746)''TCONS_00000500,(K10746)''TCONS_00020326,(K10755)''TCONS_00020326,(K10755)''TCONS_00020326,(K10755)''TCONS_00005115,(K07466)''TCONS_00005115,(K07466)''TCONS_00005115,(K07466)''TCONS_00016430,(K10739)''TCONS_00015817,(K02328)…
Genetic Information Processing	09124 Replication and repair	Non-homologous end-joining [PATH:ko03450]	29	'TCONS_00025287,(K03512)''TCONS_00025287,(K03512)''TCONS_00019198,(K10884)''TCONS_00010297,(K10885)''TCONS_00014013,(K10866)''TCONS_00034040,(K10886)''TCONS_00034040,(K10886)''TCONS_00034040,(K10886)''TCONS_00034040,(K10886)''TCONS_00001872,(K04799)''TCONS_00001872,(K04799)''TCONS_00012713,(K10865)''TCONS_00012713,(K10865)''TCONS_00005665,(K10777)''TCONS_00005665,(K10777)''TCONS_00005665,(K10777)…
Human Diseases	09161 Cancer: overview	Viral carcinogenesis [PATH:ko05203]	193	'TCONS_00024090,(K03142)''TCONS_00024090,(K03142)''TCONS_00024090,(K03142)''TCONS_00001746,(K15306)''TCONS_00001034,(K11252)''TCONS_00001034,(K11252)''TCONS_00001034,(K11252)''TCONS_00035201,(K06627)''TCONS_00009441,(K04498)''TCONS_00007842,(K03143)''TCONS_00007842,(K03143)''TCONS_00007842,(K03143)''TCONS_00030440,(K03875)''TCONS_00030440,(K03875)''TCONS_00030440,(K03875)''TCONS_00035201,(K06627)…
Human Diseases	09161 Cancer: overview	Pathways in cancer [PATH:ko05200]	182	'TCONS_00020175,(K03083)''TCONS_00035201,(K06627)''TCONS_00009441,(K04498)''TCONS_00030440,(K03875)''TCONS_00030440,(K03875)''TCONS_00030440,(K03875)''TCONS_00035201,(K06627)''TCONS_00035201,(K06627)''TCONS_00035201,(K06627)''TCONS_00035201,(K06627)''TCONS_00008850,(K06620)''TCONS_00032491,(K07203)''TCONS_00032491,(K07203)''TCONS_00032491,(K07203)''TCONS_00016210,(K01115)''TCONS_00030440,(K03875)…
Human Diseases	09161 Cancer: overview	Transcriptional misregulation in cancer [PATH:ko05202]	109	'TCONS_00032931,(K11253)''TCONS_00035201,(K06627)''TCONS_00035201,(K06627)''TCONS_00035201,(K06627)''TCONS_00035201,(K06627)''TCONS_00035201,(K06627)''TCONS_00012687,(K12823)''TCONS_00024732,(K11644)''TCONS_00024732,(K11644)''TCONS_00024732,(K11644)''TCONS_00024732,(K11644)''TCONS_00035201,(K06627)''TCONS_00035201,(K06627)''TCONS_00024732,(K11644)''TCONS_00012687,(K12823)''TCONS_00012687,(K12823)…
Human Diseases	09161 Cancer: overview	MicroRNAs in cancer [PATH:ko05206]	105	'TCONS_00013717,(K11592)''TCONS_00013717,(K11592)''TCONS_00009441,(K04498)''TCONS_00007272,(K05658)''TCONS_00007272,(K05658)''TCONS_00008850,(K06620)''TCONS_00032491,(K07203)''TCONS_00032491,(K07203)''TCONS_00032491,(K07203)''TCONS_00004728,(K00558)''TCONS_00008358,(K11430)''TCONS_00008358,(K11430)''TCONS_00008850,(K06620)''TCONS_00008850,(K06620)''TCONS_00008850,(K06620)''TCONS_00007272,(K05658)…
Human Diseases	09161 Cancer: overview	Choline metabolism in cancer [PATH:ko05231]	99	'TCONS_00020349,(K00889)''TCONS_00020349,(K00889)''TCONS_00020349,(K00889)''TCONS_00020349,(K00889)''TCONS_00020349,(K00889)''TCONS_00032491,(K07203)''TCONS_00032491,(K07203)''TCONS_00032491,(K07203)''TCONS_00016210,(K01115)''TCONS_00020349,(K00889)''TCONS_00020349,(K00889)''TCONS_00020349,(K00889)''TCONS_00020349,(K00889)''TCONS_00020349,(K00889)''TCONS_00020349,(K00889)''TCONS_00020349,(K00889)…
Human Diseases	09161 Cancer: overview	Central carbon metabolism in cancer [PATH:ko05230]	77	'TCONS_00026611,(K00161)''TCONS_00005568,(K00036)''TCONS_00005568,(K00036)''TCONS_00005568,(K00036)''TCONS_00005568,(K00036)''TCONS_00005568,(K00036)''TCONS_00005568,(K00036)''TCONS_00005568,(K00036)''TCONS_00032491,(K07203)''TCONS_00032491,(K07203)''TCONS_00032491,(K07203)''TCONS_00004809,(K00844)''TCONS_00004809,(K00844)''TCONS_00004809,(K00844)''TCONS_00004809,(K00844)''TCONS_00004809,(K00844)…
Human Diseases	09161 Cancer: overview	Proteoglycans in cancer [PATH:ko05205]	60	'TCONS_00032491,(K07203)''TCONS_00032491,(K07203)''TCONS_00032491,(K07203)''TCONS_00012687,(K12823)''TCONS_00013249,(K04392)''TCONS_00013249,(K04392)''TCONS_00024248,(K06269)''TCONS_00024248,(K06269)''TCONS_00024248,(K06269)''TCONS_00024248,(K06269)''TCONS_00024248,(K06269)''TCONS_00024248,(K06269)''TCONS_00012687,(K12823)''TCONS_00012687,(K12823)''TCONS_00012687,(K12823)''TCONS_00012687,(K12823)…
Human Diseases	09161 Cancer: overview	Chemical carcinogenesis [PATH:ko05204]	57	'TCONS_00006781,(K00121)''TCONS_00019507,(K00799)''TCONS_00019507,(K00799)''TCONS_00019507,(K00799)''TCONS_00019507,(K00799)''TCONS_00019507,(K00799)''TCONS_00019507,(K00799)''TCONS_00019507,(K00799)''TCONS_00019507,(K00799)''TCONS_00019507,(K00799)''TCONS_00019507,(K00799)''TCONS_00019507,(K00799)''TCONS_00019507,(K00799)''TCONS_00019507,(K00799)''TCONS_00006781,(K00121)''TCONS_00006781,(K00121)…
Human Diseases	09161 Cancer: overview	PD-L1 expression and PD-1 checkpoint pathway in cancer [PATH:ko05235]	35	'TCONS_00032491,(K07203)''TCONS_00032491,(K07203)''TCONS_00032491,(K07203)''TCONS_00031310,(K03097)''TCONS_00031310,(K03097)''TCONS_00007989,(K03115)''TCONS_00007989,(K03115)''TCONS_00000155,(K04688)''TCONS_00000155,(K04688)''TCONS_00000155,(K04688)''TCONS_00000155,(K04688)''TCONS_00028168,(K01110)''TCONS_00028168,(K01110)''TCONS_00013401,(K06268)''TCONS_00013401,(K06268)''TCONS_00013401,(K06268)…
Human Diseases	09162 Cancer: specific types	Hepatocellular carcinoma [PATH:ko05225]	94	'TCONS_00020175,(K03083)''TCONS_00002802,(K11340)''TCONS_00020328,(K11649)''TCONS_00020328,(K11649)''TCONS_00008850,(K06620)''TCONS_00032491,(K07203)''TCONS_00032491,(K07203)''TCONS_00032491,(K07203)''TCONS_00019507,(K00799)''TCONS_00019507,(K00799)''TCONS_00020328,(K11649)''TCONS_00020328,(K11649)''TCONS_00020328,(K11649)''TCONS_00008850,(K06620)''TCONS_00008850,(K06620)''TCONS_00008850,(K06620)…
Human Diseases	09162 Cancer: specific types	Pancreatic cancer [PATH:ko05212]	57	'TCONS_00008850,(K06620)''TCONS_00032491,(K07203)''TCONS_00032491,(K07203)''TCONS_00032491,(K07203)''TCONS_00016210,(K01115)''TCONS_00013249,(K04392)''TCONS_00013249,(K04392)''TCONS_00008850,(K06620)''TCONS_00008850,(K06620)''TCONS_00008850,(K06620)''TCONS_00016210,(K01115)''TCONS_00016210,(K01115)''TCONS_00016210,(K01115)''TCONS_00016210,(K01115)''TCONS_00000155,(K04688)''TCONS_00000155,(K04688)…
Human Diseases	09162 Cancer: specific types	Gastric cancer [PATH:ko05226]	55	'TCONS_00020175,(K03083)''TCONS_00007272,(K05658)''TCONS_00007272,(K05658)''TCONS_00008850,(K06620)''TCONS_00032491,(K07203)''TCONS_00032491,(K07203)''TCONS_00032491,(K07203)''TCONS_00008850,(K06620)''TCONS_00008850,(K06620)''TCONS_00008850,(K06620)''TCONS_00007272,(K05658)''TCONS_00007272,(K05658)''TCONS_00007272,(K05658)''TCONS_00007272,(K05658)''TCONS_00007272,(K05658)''TCONS_00007272,(K05658)…
Human Diseases	09162 Cancer: specific types	Colorectal cancer [PATH:ko05210]	36	'TCONS_00020175,(K03083)''TCONS_00032491,(K07203)''TCONS_00032491,(K07203)''TCONS_00032491,(K07203)''TCONS_00013249,(K04392)''TCONS_00013249,(K04392)''TCONS_00000155,(K04688)''TCONS_00000155,(K04688)''TCONS_00000155,(K04688)''TCONS_00000155,(K04688)''TCONS_00000272,(K08735)''TCONS_00005221,(K08737)''TCONS_00005221,(K08737)''TCONS_00005221,(K08737)''TCONS_00005221,(K08737)''TCONS_00029136,(K08734)…
Human Diseases	09162 Cancer: specific types	Prostate cancer [PATH:ko05215]	35	'TCONS_00020175,(K03083)''TCONS_00009441,(K04498)''TCONS_00008850,(K06620)''TCONS_00032491,(K07203)''TCONS_00032491,(K07203)''TCONS_00032491,(K07203)''TCONS_00021233,(K09487)''TCONS_00021233,(K09487)''TCONS_00008850,(K06620)''TCONS_00008850,(K06620)''TCONS_00008850,(K06620)''TCONS_00021233,(K09487)''TCONS_00028168,(K01110)''TCONS_00028168,(K01110)''TCONS_00025586,(K06276)''TCONS_00020175,(K03083)…
Human Diseases	09162 Cancer: specific types	Small cell lung cancer [PATH:ko05222]	24	'TCONS_00030440,(K03875)''TCONS_00030440,(K03875)''TCONS_00030440,(K03875)''TCONS_00008850,(K06620)''TCONS_00030440,(K03875)''TCONS_00008850,(K06620)''TCONS_00008850,(K06620)''TCONS_00008850,(K06620)''TCONS_00028168,(K01110)''TCONS_00028168,(K01110)''TCONS_00008850,(K06620)''TCONS_00008850,(K06620)''TCONS_00008850,(K06620)''TCONS_00009507,(K01522)''TCONS_00009507,(K01522)''TCONS_00009507,(K01522)…
Human Diseases	09162 Cancer: specific types	Breast cancer [PATH:ko05224]	23	'TCONS_00020175,(K03083)''TCONS_00008850,(K06620)''TCONS_00032491,(K07203)''TCONS_00032491,(K07203)''TCONS_00032491,(K07203)''TCONS_00008850,(K06620)''TCONS_00008850,(K06620)''TCONS_00008850,(K06620)''TCONS_00000155,(K04688)''TCONS_00000155,(K04688)''TCONS_00000155,(K04688)''TCONS_00000155,(K04688)''TCONS_00028168,(K01110)''TCONS_00028168,(K01110)''TCONS_00011807,(K08775)''TCONS_00020175,(K03083)…
Human Diseases	09162 Cancer: specific types	Acute myeloid leukemia [PATH:ko05221]	21	'TCONS_00035201,(K06627)''TCONS_00035201,(K06627)''TCONS_00035201,(K06627)''TCONS_00035201,(K06627)''TCONS_00035201,(K06627)''TCONS_00032491,(K07203)''TCONS_00032491,(K07203)''TCONS_00032491,(K07203)''TCONS_00035201,(K06627)''TCONS_00035201,(K06627)''TCONS_00000155,(K04688)''TCONS_00000155,(K04688)''TCONS_00000155,(K04688)''TCONS_00000155,(K04688)''TCONS_00035201,(K06627)''TCONS_00035201,(K06627)…
Human Diseases	09162 Cancer: specific types	Renal cell carcinoma [PATH:ko05211]	21	'TCONS_00009441,(K04498)''TCONS_00013249,(K04392)''TCONS_00013249,(K04392)''TCONS_00018993,(K01679)''TCONS_00013249,(K04392)''TCONS_00013249,(K04392)''TCONS_00013249,(K04392)''TCONS_00004641,(K03868)''TCONS_00004641,(K03868)''TCONS_00018993,(K01679)''TCONS_00005180,(K04368)''TCONS_00005180,(K04368)''TCONS_00013249,(K04392)''TCONS_00013249,(K04392)''TCONS_00013249,(K04392)''TCONS_00013249,(K04392)…
Human Diseases	09162 Cancer: specific types	Chronic myeloid leukemia [PATH:ko05220]	20	'TCONS_00008850,(K06620)''TCONS_00008850,(K06620)''TCONS_00008850,(K06620)''TCONS_00008850,(K06620)''TCONS_00026965,(K06067)''TCONS_00026965,(K06067)''TCONS_00026965,(K06067)''TCONS_00026965,(K06067)''TCONS_00026965,(K06067)''TCONS_00026965,(K06067)''TCONS_00026965,(K06067)''TCONS_00026965,(K06067)''TCONS_00026965,(K06067)''TCONS_00008850,(K06620)''TCONS_00008850,(K06620)''TCONS_00008850,(K06620)…
Human Diseases	09162 Cancer: specific types	Glioma [PATH:ko05214]	17	'TCONS_00008850,(K06620)''TCONS_00032491,(K07203)''TCONS_00032491,(K07203)''TCONS_00032491,(K07203)''TCONS_00008850,(K06620)''TCONS_00008850,(K06620)''TCONS_00008850,(K06620)''TCONS_00028168,(K01110)''TCONS_00028168,(K01110)''TCONS_00008850,(K06620)''TCONS_00008850,(K06620)''TCONS_00008850,(K06620)''TCONS_00005180,(K04368)''TCONS_00005180,(K04368)''TCONS_00018117,(K02183)''TCONS_00018117,(K02183)…
Human Diseases	09162 Cancer: specific types	Non-small cell lung cancer [PATH:ko05223]	16	'TCONS_00008850,(K06620)''TCONS_00008850,(K06620)''TCONS_00008850,(K06620)''TCONS_00008850,(K06620)''TCONS_00025586,(K06276)''TCONS_00008850,(K06620)''TCONS_00008850,(K06620)''TCONS_00008850,(K06620)''TCONS_00005180,(K04368)''TCONS_00005180,(K04368)''TCONS_00009507,(K01522)''TCONS_00009507,(K01522)''TCONS_00009507,(K01522)''TCONS_00009507,(K01522)''TCONS_00009507,(K01522)''TCONS_00009507,(K01522)'
Human Diseases	09162 Cancer: specific types	Endometrial cancer [PATH:ko05213]	13	'TCONS_00020175,(K03083)''TCONS_00028168,(K01110)''TCONS_00028168,(K01110)''TCONS_00029136,(K08734)''TCONS_00029136,(K08734)''TCONS_00029136,(K08734)''TCONS_00025586,(K06276)''TCONS_00020175,(K03083)''TCONS_00020175,(K03083)''TCONS_00020175,(K03083)''TCONS_00005180,(K04368)''TCONS_00005180,(K04368)''TCONS_00033978,(K06272)'
Human Diseases	09162 Cancer: specific types	Melanoma [PATH:ko05218]	11	'TCONS_00008850,(K06620)''TCONS_00008850,(K06620)''TCONS_00008850,(K06620)''TCONS_00008850,(K06620)''TCONS_00028168,(K01110)''TCONS_00028168,(K01110)''TCONS_00008850,(K06620)''TCONS_00008850,(K06620)''TCONS_00008850,(K06620)''TCONS_00005180,(K04368)''TCONS_00005180,(K04368)'
Human Diseases	09162 Cancer: specific types	Bladder cancer [PATH:ko05219]	9	'TCONS_00008850,(K06620)''TCONS_00008850,(K06620)''TCONS_00008850,(K06620)''TCONS_00008850,(K06620)''TCONS_00008850,(K06620)''TCONS_00008850,(K06620)''TCONS_00008850,(K06620)''TCONS_00005180,(K04368)''TCONS_00005180,(K04368)'
Human Diseases	09162 Cancer: specific types	Basal cell carcinoma [PATH:ko05217]	4	'TCONS_00020175,(K03083)''TCONS_00020175,(K03083)''TCONS_00020175,(K03083)''TCONS_00020175,(K03083)'
Human Diseases	09162 Cancer: specific types	Thyroid cancer [PATH:ko05216]	3	'TCONS_00032774,(K09291)''TCONS_00005180,(K04368)''TCONS_00005180,(K04368)'
Human Diseases	09163 Immune disease	Systemic lupus erythematosus [PATH:ko05322]	50	'TCONS_00032931,(K11253)''TCONS_00001034,(K11252)''TCONS_00001034,(K11252)''TCONS_00001034,(K11252)''TCONS_00018838,(K11088)''TCONS_00018838,(K11088)''TCONS_00011215,(K11251)''TCONS_00011215,(K11251)''TCONS_00001034,(K11252)''TCONS_00011215,(K11251)''TCONS_00011215,(K11251)''TCONS_00011215,(K11251)''TCONS_00011215,(K11251)''TCONS_00012723,(K11087)''TCONS_00012723,(K11087)''TCONS_00012723,(K11087)…
Human Diseases	09163 Immune disease	Rheumatoid arthritis [PATH:ko05323]	20	'TCONS_00022112,(K02148)''TCONS_00022509,(K14379)''TCONS_00022509,(K14379)''TCONS_00030262,(K02154)''TCONS_00030262,(K02154)''TCONS_00012501,(K02146)''TCONS_00012501,(K02146)''TCONS_00012501,(K02146)''TCONS_00012501,(K02146)''TCONS_00015932,(K02144)''TCONS_00027735,(K02149)''TCONS_00027735,(K02149)''TCONS_00002192,(K02151)''TCONS_00006986,(K03661)''TCONS_00006986,(K03661)''TCONS_00030262,(K02154)…
Human Diseases	09163 Immune disease	Inflammatory bowel disease [PATH:ko05321]	2	'TCONS_00024716,(K02580)''TCONS_00024716,(K02580)'
Human Diseases	09163 Immune disease	Primary immunodeficiency [PATH:ko05340]	1	'TCONS_00024447,(K03648)'
Human Diseases	09164 Neurodegenerative disease	Amyotrophic lateral sclerosis [PATH:ko05014]	360	'TCONS_00019241,(K07874)''TCONS_00034687,(K12192)''TCONS_00029869,(K20858)''TCONS_00009404,(K14297)''TCONS_00009404,(K14297)''TCONS_00009404,(K14297)''TCONS_00013497,(K04569)''TCONS_00022708,(K18723)''TCONS_00022708,(K18723)''TCONS_00022708,(K18723)''TCONS_00005062,(K14312)''TCONS_00005062,(K14312)''TCONS_00005062,(K14312)''TCONS_00032809,(K03941)''TCONS_00027522,(K02735)''TCONS_00027522,(K02735)…
Human Diseases	09164 Neurodegenerative disease	Huntington disease [PATH:ko05016]	245	'TCONS_00009142,(K03007)''TCONS_00032809,(K03941)''TCONS_00009441,(K04498)''TCONS_00027522,(K02735)''TCONS_00027522,(K02735)''TCONS_00006782,(K02267)''TCONS_00006782,(K02267)''TCONS_00027117,(K03036)''TCONS_00027117,(K03036)''TCONS_00008821,(K03064)''TCONS_00008821,(K03064)''TCONS_00012840,(K11827)''TCONS_00032491,(K07203)''TCONS_00032491,(K07203)''TCONS_00032491,(K07203)''TCONS_00016956,(K03016)…
Human Diseases	09164 Neurodegenerative disease	Alzheimer disease [PATH:ko05010]	236	'TCONS_00009319,(K04532)''TCONS_00009319,(K04532)''TCONS_00009319,(K04532)''TCONS_00009319,(K04532)''TCONS_00009319,(K04532)''TCONS_00020396,(K04505)''TCONS_00029869,(K20858)''TCONS_00020175,(K03083)''TCONS_00029886,(K00134)''TCONS_00029886,(K00134)''TCONS_00029886,(K00134)''TCONS_00029886,(K00134)''TCONS_00029886,(K00134)''TCONS_00029886,(K00134)''TCONS_00029886,(K00134)''TCONS_00032809,(K03941)…
Human Diseases	09164 Neurodegenerative disease	Parkinson disease [PATH:ko05012]	189	'TCONS_00029869,(K20858)''TCONS_00003399,(K03671)''TCONS_00003399,(K03671)''TCONS_00032809,(K03941)''TCONS_00011632,(K04554)''TCONS_00011632,(K04554)''TCONS_00027522,(K02735)''TCONS_00027522,(K02735)''TCONS_00006782,(K02267)''TCONS_00006782,(K02267)''TCONS_00027117,(K03036)''TCONS_00027117,(K03036)''TCONS_00008821,(K03064)''TCONS_00008821,(K03064)''TCONS_00030278,(K02736)''TCONS_00029869,(K20858)…
Human Diseases	09164 Neurodegenerative disease	Prion disease [PATH:ko05020]	176	'TCONS_00029869,(K20858)''TCONS_00020175,(K03083)''TCONS_00008136,(K09553)''TCONS_00008136,(K09553)''TCONS_00032809,(K03941)''TCONS_00027522,(K02735)''TCONS_00027522,(K02735)''TCONS_00006782,(K02267)''TCONS_00006782,(K02267)''TCONS_00027117,(K03036)''TCONS_00027117,(K03036)''TCONS_00008821,(K03064)''TCONS_00008821,(K03064)''TCONS_00030278,(K02736)''TCONS_00029869,(K20858)''TCONS_00017318,(K03031)…
Human Diseases	09164 Neurodegenerative disease	Spinocerebellar ataxia [PATH:ko05017]	149	'TCONS_00020093,(K08956)''TCONS_00020093,(K08956)''TCONS_00020093,(K08956)''TCONS_00029869,(K20858)''TCONS_00027522,(K02735)''TCONS_00027522,(K02735)''TCONS_00027117,(K03036)''TCONS_00027117,(K03036)''TCONS_00031927,(K08064)''TCONS_00031927,(K08064)''TCONS_00031927,(K08064)''TCONS_00031927,(K08064)''TCONS_00004341,(K17680)''TCONS_00004341,(K17680)''TCONS_00004341,(K17680)''TCONS_00004341,(K17680)…
Human Diseases	09165 Substance dependence	Alcoholism [PATH:ko05034]	95	'TCONS_00032931,(K11253)''TCONS_00035425,(K15014)''TCONS_00001034,(K11252)''TCONS_00001034,(K11252)''TCONS_00001034,(K11252)''TCONS_00011215,(K11251)''TCONS_00011215,(K11251)''TCONS_00035425,(K15014)''TCONS_00035425,(K15014)''TCONS_00001034,(K11252)''TCONS_00024248,(K06269)''TCONS_00024248,(K06269)''TCONS_00024248,(K06269)''TCONS_00024248,(K06269)''TCONS_00024248,(K06269)''TCONS_00024248,(K06269)…
Human Diseases	09165 Substance dependence	Amphetamine addiction [PATH:ko05031]	34	'TCONS_00024248,(K06269)''TCONS_00024248,(K06269)''TCONS_00024248,(K06269)''TCONS_00024248,(K06269)''TCONS_00024248,(K06269)''TCONS_00024248,(K06269)''TCONS_00026965,(K06067)''TCONS_00026965,(K06067)''TCONS_00026965,(K06067)''TCONS_00026965,(K06067)''TCONS_00026965,(K06067)''TCONS_00013401,(K06268)''TCONS_00013401,(K06268)''TCONS_00013401,(K06268)''TCONS_00026965,(K06067)''TCONS_00026965,(K06067)…
Human Diseases	09165 Substance dependence	Morphine addiction [PATH:ko05032]	4	'TCONS_00023128,(K15015)''TCONS_00023128,(K15015)''TCONS_00023128,(K15015)''TCONS_00034461,(K04536)'
Human Diseases	09165 Substance dependence	Nicotine addiction [PATH:ko05033]	3	'TCONS_00023128,(K15015)''TCONS_00023128,(K15015)''TCONS_00023128,(K15015)'
Human Diseases	09165 Substance dependence	Cocaine addiction [PATH:ko05030]	2	'TCONS_00024716,(K02580)''TCONS_00024716,(K02580)'
Human Diseases	09166 Cardiovascular disease	Fluid shear stress and atherosclerosis [PATH:ko05418]	112	'TCONS_00003399,(K03671)''TCONS_00003399,(K03671)''TCONS_00019507,(K00799)''TCONS_00021233,(K09487)''TCONS_00021233,(K09487)''TCONS_00003399,(K03671)''TCONS_00013249,(K04392)''TCONS_00013249,(K04392)''TCONS_00019507,(K00799)''TCONS_00003399,(K03671)''TCONS_00023546,(K07198)''TCONS_00023546,(K07198)''TCONS_00023546,(K07198)''TCONS_00023546,(K07198)''TCONS_00023546,(K07198)''TCONS_00023546,(K07198)…
Human Diseases	09166 Cardiovascular disease	Viral myocarditis [PATH:ko05416]	19	'TCONS_00013249,(K04392)''TCONS_00013249,(K04392)''TCONS_00013249,(K04392)''TCONS_00013249,(K04392)''TCONS_00013249,(K04392)''TCONS_00003786,(K03260)''TCONS_00003786,(K03260)''TCONS_00003786,(K03260)''TCONS_00003786,(K03260)''TCONS_00003786,(K03260)''TCONS_00013249,(K04392)''TCONS_00013249,(K04392)''TCONS_00013249,(K04392)''TCONS_00013249,(K04392)''TCONS_00013249,(K04392)''TCONS_00013249,(K04392)…
Human Diseases	09166 Cardiovascular disease	Hypertrophic cardiomyopathy [PATH:ko05410]	16	'TCONS_00023546,(K07198)''TCONS_00023546,(K07198)''TCONS_00023546,(K07198)''TCONS_00023546,(K07198)''TCONS_00023546,(K07198)''TCONS_00023546,(K07198)''TCONS_00001163,(K07199)''TCONS_00001163,(K07199)''TCONS_00001163,(K07199)''TCONS_00001163,(K07199)''TCONS_00001163,(K07199)''TCONS_00001163,(K07199)''TCONS_00001163,(K07199)''TCONS_00001163,(K07199)''TCONS_00001163,(K07199)''TCONS_00001163,(K07199)'
Human Diseases	09167 Endocrine and metabolic disease	Non-alcoholic fatty liver disease [PATH:ko04932]	98	'TCONS_00020175,(K03083)''TCONS_00032809,(K03941)''TCONS_00006782,(K02267)''TCONS_00006782,(K02267)''TCONS_00032809,(K03941)''TCONS_00014998,(K02265)''TCONS_00014998,(K02265)''TCONS_00024438,(K03963)''TCONS_00024438,(K03963)''TCONS_00024438,(K03963)''TCONS_00028072,(K08852)''TCONS_00028072,(K08852)''TCONS_00028072,(K08852)''TCONS_00013249,(K04392)''TCONS_00013249,(K04392)''TCONS_00026547,(K03953)…
Human Diseases	09167 Endocrine and metabolic disease	Insulin resistance [PATH:ko04931]	84	'TCONS_00026080,(K14497)''TCONS_00020175,(K03083)''TCONS_00032491,(K07203)''TCONS_00032491,(K07203)''TCONS_00032491,(K07203)''TCONS_00026080,(K14497)''TCONS_00026080,(K14497)''TCONS_00026080,(K14497)''TCONS_00026080,(K14497)''TCONS_00026080,(K14497)''TCONS_00024248,(K06269)''TCONS_00024248,(K06269)''TCONS_00024248,(K06269)''TCONS_00024248,(K06269)''TCONS_00024248,(K06269)''TCONS_00024248,(K06269)…
Human Diseases	09167 Endocrine and metabolic disease	Type II diabetes mellitus [PATH:ko04930]	41	'TCONS_00032491,(K07203)''TCONS_00032491,(K07203)''TCONS_00032491,(K07203)''TCONS_00004809,(K00844)''TCONS_00004809,(K00844)''TCONS_00004809,(K00844)''TCONS_00004809,(K00844)''TCONS_00004809,(K00844)''TCONS_00004809,(K00844)''TCONS_00016715,(K00873)''TCONS_00004809,(K00844)''TCONS_00016715,(K00873)''TCONS_00016715,(K00873)''TCONS_00016715,(K00873)''TCONS_00016715,(K00873)''TCONS_00016715,(K00873)…
Human Diseases	09167 Endocrine and metabolic disease	AGE-RAGE signaling pathway in diabetic complications [PATH:ko04933]	21	'TCONS_00013249,(K04392)''TCONS_00013249,(K04392)''TCONS_00004236,(K05857)''TCONS_00004236,(K05857)''TCONS_00004236,(K05857)''TCONS_00004236,(K05857)''TCONS_00004236,(K05857)''TCONS_00004236,(K05857)''TCONS_00013249,(K04392)''TCONS_00013249,(K04392)''TCONS_00013249,(K04392)''TCONS_00004236,(K05857)''TCONS_00024716,(K02580)''TCONS_00024716,(K02580)''TCONS_00013249,(K04392)''TCONS_00013249,(K04392)…
Human Diseases	09167 Endocrine and metabolic disease	Cushing syndrome [PATH:ko04934]	19	'TCONS_00020175,(K03083)''TCONS_00008850,(K06620)''TCONS_00002222,(K14964)''TCONS_00008850,(K06620)''TCONS_00008850,(K06620)''TCONS_00008850,(K06620)''TCONS_00018993,(K01679)''TCONS_00023058,(K14961)''TCONS_00031358,(K14963)''TCONS_00020175,(K03083)''TCONS_00020175,(K03083)''TCONS_00020175,(K03083)''TCONS_00008850,(K06620)''TCONS_00008850,(K06620)''TCONS_00008850,(K06620)''TCONS_00018993,(K01679)…
Human Diseases	09167 Endocrine and metabolic disease	Type I diabetes mellitus [PATH:ko04940]	10	'TCONS_00023658,(K01580)''TCONS_00023658,(K01580)''TCONS_00023658,(K01580)''TCONS_00023658,(K01580)''TCONS_00023658,(K01580)''TCONS_00023658,(K01580)''TCONS_00023658,(K01580)''TCONS_00035344,(K04077)''TCONS_00035344,(K04077)''TCONS_00023658,(K01580)'
Human Diseases	09171 Infectious disease: bacterial	Shigellosis [PATH:ko05131]	202	'TCONS_00032931,(K11253)''TCONS_00020175,(K03083)''TCONS_00032000,(K05758)''TCONS_00032000,(K05758)''TCONS_00032000,(K05758)''TCONS_00032000,(K05758)''TCONS_00032000,(K05758)''TCONS_00032491,(K07203)''TCONS_00032491,(K07203)''TCONS_00032491,(K07203)''TCONS_00004809,(K00844)''TCONS_00004809,(K00844)''TCONS_00004809,(K00844)''TCONS_00004809,(K00844)''TCONS_00004809,(K00844)''TCONS_00016194,(K08336)…
Human Diseases	09171 Infectious disease: bacterial	Salmonella infection [PATH:ko05132]	166	'TCONS_00003399,(K03671)''TCONS_00003399,(K03671)''TCONS_00029886,(K00134)''TCONS_00029886,(K00134)''TCONS_00029886,(K00134)''TCONS_00029886,(K00134)''TCONS_00029886,(K00134)''TCONS_00029886,(K00134)''TCONS_00029886,(K00134)''TCONS_00032877,(K17637)''TCONS_00032000,(K05758)''TCONS_00032000,(K05758)''TCONS_00032000,(K05758)''TCONS_00032000,(K05758)''TCONS_00032000,(K05758)''TCONS_00035237,(K10418)…
Human Diseases	09171 Infectious disease: bacterial	Pathogenic Escherichia coli infection [PATH:ko05130]	110	'TCONS_00019241,(K07874)''TCONS_00027689,(K20352)''TCONS_00027689,(K20352)''TCONS_00027689,(K20352)''TCONS_00029886,(K00134)''TCONS_00029886,(K00134)''TCONS_00029886,(K00134)''TCONS_00029886,(K00134)''TCONS_00029886,(K00134)''TCONS_00029886,(K00134)''TCONS_00029886,(K00134)''TCONS_00027689,(K20352)''TCONS_00027689,(K20352)''TCONS_00032000,(K05758)''TCONS_00032000,(K05758)''TCONS_00032000,(K05758)…
Human Diseases	09171 Infectious disease: bacterial	Tuberculosis [PATH:ko05152]	66	'TCONS_00009441,(K04498)''TCONS_00031927,(K08064)''TCONS_00031927,(K08064)''TCONS_00031927,(K08064)''TCONS_00031927,(K08064)''TCONS_00030262,(K02154)''TCONS_00030262,(K02154)''TCONS_00031927,(K08064)''TCONS_00031927,(K08064)''TCONS_00031927,(K08064)''TCONS_00035344,(K04077)''TCONS_00035344,(K04077)''TCONS_00031927,(K08064)''TCONS_00031927,(K08064)''TCONS_00031927,(K08064)''TCONS_00012501,(K02146)…
Human Diseases	09171 Infectious disease: bacterial	Legionellosis [PATH:ko05134]	65	'TCONS_00019241,(K07874)''TCONS_00014498,(K08517)''TCONS_00014498,(K08517)''TCONS_00014498,(K08517)''TCONS_00014498,(K08517)''TCONS_00014498,(K08517)''TCONS_00008565,(K07937)''TCONS_00008565,(K07937)''TCONS_00019241,(K07874)''TCONS_00024851,(K03283)''TCONS_00035344,(K04077)''TCONS_00035344,(K04077)''TCONS_00019004,(K07953)''TCONS_00019004,(K07953)''TCONS_00019004,(K07953)''TCONS_00019004,(K07953)…
Human Diseases	09171 Infectious disease: bacterial	Vibrio cholerae infection [PATH:ko05110]	62	'TCONS_00022112,(K02148)''TCONS_00031863,(K10949)''TCONS_00031863,(K10949)''TCONS_00003864,(K10956)''TCONS_00030262,(K02154)''TCONS_00030262,(K02154)''TCONS_00013733,(K09481)''TCONS_00013733,(K09481)''TCONS_00013733,(K09481)''TCONS_00013733,(K09481)''TCONS_00013733,(K09481)''TCONS_00008565,(K07937)''TCONS_00008565,(K07937)''TCONS_00031863,(K10949)''TCONS_00012501,(K02146)''TCONS_00012501,(K02146)…
Human Diseases	09171 Infectious disease: bacterial	Yersinia infection [PATH:ko05135]	54	'TCONS_00020175,(K03083)''TCONS_00025202,(K18584)''TCONS_00020349,(K00889)''TCONS_00020349,(K00889)''TCONS_00020349,(K00889)''TCONS_00020349,(K00889)''TCONS_00020349,(K00889)''TCONS_00020349,(K00889)''TCONS_00020349,(K00889)''TCONS_00020349,(K00889)''TCONS_00020349,(K00889)''TCONS_00020349,(K00889)''TCONS_00020349,(K00889)''TCONS_00020349,(K00889)''TCONS_00020349,(K00889)''TCONS_00020349,(K00889)…
Human Diseases	09171 Infectious disease: bacterial	Bacterial invasion of epithelial cells [PATH:ko05100]	53	'TCONS_00023436,(K01528)''TCONS_00026875,(K13728)''TCONS_00026875,(K13728)''TCONS_00026875,(K13728)''TCONS_00026875,(K13728)''TCONS_00026875,(K13728)''TCONS_00026875,(K13728)''TCONS_00032000,(K05758)''TCONS_00032000,(K05758)''TCONS_00032000,(K05758)''TCONS_00032000,(K05758)''TCONS_00032000,(K05758)''TCONS_00023436,(K01528)''TCONS_00023436,(K01528)''TCONS_00023436,(K01528)''TCONS_00007490,(K05756)…
Human Diseases	09171 Infectious disease: bacterial	Epithelial cell signaling in Helicobacter pylori infection [PATH:ko05120]	32	'TCONS_00022112,(K02148)''TCONS_00013249,(K04392)''TCONS_00013249,(K04392)''TCONS_00030262,(K02154)''TCONS_00030262,(K02154)''TCONS_00012501,(K02146)''TCONS_00012501,(K02146)''TCONS_00012501,(K02146)''TCONS_00012501,(K02146)''TCONS_00015932,(K02144)''TCONS_00027735,(K02149)''TCONS_00027735,(K02149)''TCONS_00002192,(K02151)''TCONS_00013249,(K04392)''TCONS_00013249,(K04392)''TCONS_00013249,(K04392)…
Human Diseases	09171 Infectious disease: bacterial	Pertussis [PATH:ko05133]	8	'TCONS_00006164,(K05765)''TCONS_00006164,(K05765)''TCONS_00006164,(K05765)''TCONS_00018117,(K02183)''TCONS_00024716,(K02580)''TCONS_00024716,(K02580)''TCONS_00018117,(K02183)''TCONS_00018117,(K02183)'
Human Diseases	09172 Infectious disease: viral	Human papillomavirus infection [PATH:ko05165]	142	'TCONS_00020396,(K04505)''TCONS_00020175,(K03083)''TCONS_00000527,(K12236)''TCONS_00022112,(K02148)''TCONS_00035201,(K06627)''TCONS_00009441,(K04498)''TCONS_00002580,(K04354)''TCONS_00002580,(K04354)''TCONS_00002580,(K04354)''TCONS_00002580,(K04354)''TCONS_00002580,(K04354)''TCONS_00035201,(K06627)''TCONS_00035201,(K06627)''TCONS_00035201,(K06627)''TCONS_00035201,(K06627)''TCONS_00032491,(K07203)…
Human Diseases	09172 Infectious disease: viral	Human T-cell leukemia virus 1 infection [PATH:ko05166]	117	'TCONS_00017420,(K03352)''TCONS_00001746,(K15306)''TCONS_00016932,(K08057)''TCONS_00016932,(K08057)''TCONS_00035201,(K06627)''TCONS_00009441,(K04498)''TCONS_00035201,(K06627)''TCONS_00035201,(K06627)''TCONS_00035201,(K06627)''TCONS_00035201,(K06627)''TCONS_00008850,(K06620)''TCONS_00016751,(K02180)''TCONS_00035212,(K15304)''TCONS_00035212,(K15304)''TCONS_00016751,(K02180)''TCONS_00018315,(K03353)…
Human Diseases	09172 Infectious disease: viral	Herpes simplex virus 1 infection [PATH:ko05168]	107	'TCONS_00034900,(K12890)''TCONS_00034900,(K12890)''TCONS_00034900,(K12890)''TCONS_00034900,(K12890)''TCONS_00034900,(K12890)''TCONS_00016932,(K08057)''TCONS_00016932,(K08057)''TCONS_00034900,(K12890)''TCONS_00034900,(K12890)''TCONS_00034900,(K12890)''TCONS_00034900,(K12890)''TCONS_00034900,(K12890)''TCONS_00034900,(K12890)''TCONS_00034900,(K12890)''TCONS_00025267,(K12896)''TCONS_00025267,(K12896)…
Human Diseases	09172 Infectious disease: viral	Epstein-Barr virus infection [PATH:ko05169]	102	'TCONS_00016932,(K08057)''TCONS_00016932,(K08057)''TCONS_00035201,(K06627)''TCONS_00030440,(K03875)''TCONS_00030440,(K03875)''TCONS_00030440,(K03875)''TCONS_00027117,(K03036)''TCONS_00027117,(K03036)''TCONS_00035201,(K06627)''TCONS_00008821,(K03064)''TCONS_00008821,(K03064)''TCONS_00035201,(K06627)''TCONS_00035201,(K06627)''TCONS_00035201,(K06627)''TCONS_00008850,(K06620)''TCONS_00017318,(K03031)…
Human Diseases	09172 Infectious disease: viral	Kaposi sarcoma-associated herpesvirus infection [PATH:ko05167]	102	'TCONS_00020175,(K03083)''TCONS_00009441,(K04498)''TCONS_00008850,(K06620)''TCONS_00032491,(K07203)''TCONS_00032491,(K07203)''TCONS_00032491,(K07203)''TCONS_00009315,(K08341)''TCONS_00013249,(K04392)''TCONS_00013249,(K04392)''TCONS_00008850,(K06620)''TCONS_00008850,(K06620)''TCONS_00008850,(K06620)''TCONS_00009315,(K08341)''TCONS_00029643,(K08334)''TCONS_00029643,(K08334)''TCONS_00029643,(K08334)…
Human Diseases	09172 Infectious disease: viral	Human immunodeficiency virus 1 infection [PATH:ko05170]	86	'TCONS_00034883,(K06632)''TCONS_00034883,(K06632)''TCONS_00016932,(K08057)''TCONS_00016932,(K08057)''TCONS_00032491,(K07203)''TCONS_00032491,(K07203)''TCONS_00032491,(K07203)''TCONS_00022783,(K12391)''TCONS_00022783,(K12391)''TCONS_00022783,(K12391)''TCONS_00022783,(K12391)''TCONS_00022740,(K12393)''TCONS_00006164,(K05765)''TCONS_00006164,(K05765)''TCONS_00013249,(K04392)''TCONS_00013249,(K04392)…
Human Diseases	09172 Infectious disease: viral	Influenza A [PATH:ko05164]	64	'TCONS_00009976,(K07904)''TCONS_00009404,(K14297)''TCONS_00009404,(K14297)''TCONS_00009404,(K14297)''TCONS_00009441,(K04498)''TCONS_00004316,(K14404)''TCONS_00004316,(K14404)''TCONS_00004316,(K14404)''TCONS_00004316,(K14404)''TCONS_00004316,(K14404)''TCONS_00004316,(K14404)''TCONS_00004316,(K14404)''TCONS_00004316,(K14404)''TCONS_00004316,(K14404)''TCONS_00004316,(K14404)''TCONS_00004316,(K14404)…
Human Diseases	09172 Infectious disease: viral	Human cytomegalovirus infection [PATH:ko05163]	55	'TCONS_00016932,(K08057)''TCONS_00016932,(K08057)''TCONS_00020175,(K03083)''TCONS_00008850,(K06620)''TCONS_00032491,(K07203)''TCONS_00032491,(K07203)''TCONS_00032491,(K07203)''TCONS_00013249,(K04392)''TCONS_00013249,(K04392)''TCONS_00008850,(K06620)''TCONS_00008850,(K06620)''TCONS_00008850,(K06620)''TCONS_00000155,(K04688)''TCONS_00000155,(K04688)''TCONS_00000155,(K04688)''TCONS_00000155,(K04688)…
Human Diseases	09172 Infectious disease: viral	Hepatitis C [PATH:ko05160]	47	'TCONS_00020175,(K03083)''TCONS_00002580,(K04354)''TCONS_00002580,(K04354)''TCONS_00002580,(K04354)''TCONS_00002580,(K04354)''TCONS_00002580,(K04354)''TCONS_00008850,(K06620)''TCONS_00002580,(K04354)''TCONS_00002580,(K04354)''TCONS_00008850,(K06620)''TCONS_00008850,(K06620)''TCONS_00008850,(K06620)''TCONS_00032717,(K03237)''TCONS_00012989,(K06630)''TCONS_00025440,(K03456)''TCONS_00025440,(K03456)…
Human Diseases	09172 Infectious disease: viral	Measles [PATH:ko05162]	30	'TCONS_00020175,(K03083)''TCONS_00019166,(K03247)''TCONS_00031310,(K03097)''TCONS_00031310,(K03097)''TCONS_00032717,(K03237)''TCONS_00007989,(K03115)''TCONS_00007989,(K03115)''TCONS_00024851,(K03283)''TCONS_00026255,(K16196)''TCONS_00026255,(K16196)''TCONS_00026255,(K16196)''TCONS_00026255,(K16196)''TCONS_00026255,(K16196)''TCONS_00026255,(K16196)''TCONS_00024851,(K03283)''TCONS_00020175,(K03083)…
Human Diseases	09172 Infectious disease: viral	Hepatitis B [PATH:ko05161]	28	'TCONS_00035201,(K06627)''TCONS_00009441,(K04498)''TCONS_00035201,(K06627)''TCONS_00035201,(K06627)''TCONS_00035201,(K06627)''TCONS_00035201,(K06627)''TCONS_00008850,(K06620)''TCONS_00035201,(K06627)''TCONS_00035201,(K06627)''TCONS_00008850,(K06620)''TCONS_00008850,(K06620)''TCONS_00008850,(K06620)''TCONS_00017814,(K11594)''TCONS_00035201,(K06627)''TCONS_00008850,(K06620)''TCONS_00008850,(K06620)…
Human Diseases	09174 Infectious disease: parasitic	Toxoplasmosis [PATH:ko05145]	31	'TCONS_00003171,(K13412)''TCONS_00003171,(K13412)''TCONS_00003171,(K13412)''TCONS_00003171,(K13412)''TCONS_00003171,(K13412)''TCONS_00003171,(K13412)''TCONS_00003171,(K13412)''TCONS_00003171,(K13412)''TCONS_00003171,(K13412)''TCONS_00024851,(K03283)''TCONS_00003171,(K13412)''TCONS_00003171,(K13412)''TCONS_00003171,(K13412)''TCONS_00024851,(K03283)''TCONS_00025586,(K06276)''TCONS_00003171,(K13412)…
Human Diseases	09174 Infectious disease: parasitic	Chagas disease [PATH:ko05142]	19	'TCONS_00016932,(K08057)''TCONS_00016932,(K08057)''TCONS_00002580,(K04354)''TCONS_00002580,(K04354)''TCONS_00002580,(K04354)''TCONS_00002580,(K04354)''TCONS_00002580,(K04354)''TCONS_00002580,(K04354)''TCONS_00002580,(K04354)''TCONS_00025440,(K03456)''TCONS_00025440,(K03456)''TCONS_00019947,(K04382)''TCONS_00019947,(K04382)''TCONS_00007525,(K01354)''TCONS_00007525,(K01354)''TCONS_00024716,(K02580)…
Human Diseases	09174 Infectious disease: parasitic	Leishmaniasis [PATH:ko05140]	14	'TCONS_00024716,(K02580)''TCONS_00024716,(K02580)''TCONS_00008024,(K03231)''TCONS_00008024,(K03231)''TCONS_00008024,(K03231)''TCONS_00008024,(K03231)''TCONS_00008024,(K03231)''TCONS_00008024,(K03231)''TCONS_00008024,(K03231)''TCONS_00008024,(K03231)''TCONS_00008024,(K03231)''TCONS_00008024,(K03231)''TCONS_00008024,(K03231)''TCONS_00008024,(K03231)'
Human Diseases	09174 Infectious disease: parasitic	Amoebiasis [PATH:ko05146]	10	'TCONS_00008752,(K13963)''TCONS_00008752,(K13963)''TCONS_00008752,(K13963)''TCONS_00029470,(K01476)''TCONS_00033504,(K07897)''TCONS_00033504,(K07897)''TCONS_00033504,(K07897)''TCONS_00033504,(K07897)''TCONS_00024716,(K02580)''TCONS_00024716,(K02580)'
Human Diseases	09174 Infectious disease: parasitic	Malaria [PATH:ko05144]	3	'TCONS_00011792,(K13849)''TCONS_00011792,(K13849)''TCONS_00011792,(K13849)'
Human Diseases	09174 Infectious disease: parasitic	African trypanosomiasis [PATH:ko05143]	2	'TCONS_00007525,(K01354)''TCONS_00007525,(K01354)'
Human Diseases	09175 Drug resistance: antimicrobial	Cationic antimicrobial peptide (CAMP) resistance [PATH:ko01503]	6	'TCONS_00002038,(K00677)''TCONS_00002038,(K00677)''TCONS_00002038,(K00677)''TCONS_00002038,(K00677)''TCONS_00002038,(K00677)''TCONS_00002038,(K00677)'
Human Diseases	09175 Drug resistance: antimicrobial	Vancomycin resistance [PATH:ko01502]	2	'TCONS_00003081,(K02563)''TCONS_00011799,(K01921)'
Human Diseases	09176 Drug resistance: antineoplastic	Platinum drug resistance [PATH:ko01524]	92	'TCONS_00019826,(K17686)''TCONS_00019826,(K17686)''TCONS_00019826,(K17686)''TCONS_00007633,(K02350)''TCONS_00007633,(K02350)''TCONS_00007633,(K02350)''TCONS_00007633,(K02350)''TCONS_00019507,(K00799)''TCONS_00004198,(K14686)''TCONS_00004198,(K14686)''TCONS_00004198,(K14686)''TCONS_00019507,(K00799)''TCONS_00029128,(K10849)''TCONS_00029128,(K10849)''TCONS_00029128,(K10849)''TCONS_00029128,(K10849)…
Human Diseases	09176 Drug resistance: antineoplastic	Antifolate resistance [PATH:ko01523]	40	'TCONS_00014649,(K00600)''TCONS_00014649,(K00600)''TCONS_00014649,(K00600)''TCONS_00020688,(K01307)''TCONS_00020688,(K01307)''TCONS_00005901,(K00297)''TCONS_00012460,(K01930)''TCONS_00012460,(K01930)''TCONS_00012460,(K01930)''TCONS_00012460,(K01930)''TCONS_00012460,(K01930)''TCONS_00014649,(K00600)''TCONS_00014649,(K00600)''TCONS_00014649,(K00600)''TCONS_00014649,(K00600)''TCONS_00012460,(K01930)…
Human Diseases	09176 Drug resistance: antineoplastic	Endocrine resistance [PATH:ko01522]	34	'TCONS_00008850,(K06620)''TCONS_00032491,(K07203)''TCONS_00032491,(K07203)''TCONS_00032491,(K07203)''TCONS_00008850,(K06620)''TCONS_00008850,(K06620)''TCONS_00008850,(K06620)''TCONS_00000155,(K04688)''TCONS_00000155,(K04688)''TCONS_00000155,(K04688)''TCONS_00000155,(K04688)''TCONS_00008850,(K06620)''TCONS_00008850,(K06620)''TCONS_00008850,(K06620)''TCONS_00030173,(K05931)''TCONS_00005180,(K04368)…
Human Diseases	09176 Drug resistance: antineoplastic	EGFR tyrosine kinase inhibitor resistance [PATH:ko01521]	18	'TCONS_00020175,(K03083)''TCONS_00032491,(K07203)''TCONS_00032491,(K07203)''TCONS_00032491,(K07203)''TCONS_00000155,(K04688)''TCONS_00000155,(K04688)''TCONS_00000155,(K04688)''TCONS_00000155,(K04688)''TCONS_00028168,(K01110)''TCONS_00028168,(K01110)''TCONS_00001558,(K03259)''TCONS_00020175,(K03083)''TCONS_00020175,(K03083)''TCONS_00020175,(K03083)''TCONS_00001558,(K03259)''TCONS_00001558,(K03259)…
Metabolism	09101 Carbohydrate metabolism	Amino sugar and nucleotide sugar metabolism [PATH:ko00520]	184	'TCONS_00010118,(K05305)''TCONS_00010118,(K05305)''TCONS_00010118,(K05305)''TCONS_00010118,(K05305)''TCONS_00009747,(K08679)''TCONS_00009747,(K08679)''TCONS_00016805,(K00770)''TCONS_00016805,(K00770)''TCONS_00016805,(K00770)''TCONS_00016805,(K00770)''TCONS_00035560,(K12373)''TCONS_00033072,(K13648)''TCONS_00033072,(K13648)''TCONS_00033072,(K13648)''TCONS_00033072,(K13648)''TCONS_00033072,(K13648)…
Metabolism	09101 Carbohydrate metabolism	Glycolysis / Gluconeogenesis [PATH:ko00010]	160	'TCONS_00026611,(K00161)''TCONS_00002428,(K00895)''TCONS_00029886,(K00134)''TCONS_00029886,(K00134)''TCONS_00029886,(K00134)''TCONS_00029886,(K00134)''TCONS_00029886,(K00134)''TCONS_00029886,(K00134)''TCONS_00029886,(K00134)''TCONS_00006781,(K00121)''TCONS_00005402,(K00128)''TCONS_00005402,(K00128)''TCONS_00005402,(K00128)''TCONS_00034515,(K00627)''TCONS_00005402,(K00128)''TCONS_00005402,(K00128)…
Metabolism	09101 Carbohydrate metabolism	Starch and sucrose metabolism [PATH:ko00500]	154	'TCONS_00025204,(K01179)''TCONS_00018980,(K01188)''TCONS_00034866,(K01214)''TCONS_00028716,(K16055)''TCONS_00028716,(K16055)''TCONS_00028716,(K16055)''TCONS_00028716,(K16055)''TCONS_00003337,(K19891)''TCONS_00003337,(K19891)''TCONS_00003337,(K19891)''TCONS_00003337,(K19891)''TCONS_00003337,(K19891)''TCONS_00003337,(K19891)''TCONS_00003337,(K19891)''TCONS_00003337,(K19891)''TCONS_00028716,(K16055)…
Metabolism	09101 Carbohydrate metabolism	Pyruvate metabolism [PATH:ko00620]	129	'TCONS_00026141,(K02160)''TCONS_00026141,(K02160)''TCONS_00026141,(K02160)''TCONS_00026141,(K02160)''TCONS_00026611,(K00161)''TCONS_00016934,(K01069)''TCONS_00000805,(K01759)''TCONS_00000805,(K01759)''TCONS_00000805,(K01759)''TCONS_00000805,(K01759)''TCONS_00000805,(K01759)''TCONS_00005402,(K00128)''TCONS_00005402,(K00128)''TCONS_00005402,(K00128)''TCONS_00034515,(K00627)''TCONS_00022210,(K11262)…
Metabolism	09101 Carbohydrate metabolism	Inositol phosphate metabolism [PATH:ko00562]	127	'TCONS_00030094,(K01114)''TCONS_00030094,(K01114)''TCONS_00030094,(K01114)''TCONS_00020349,(K00889)''TCONS_00020349,(K00889)''TCONS_00020349,(K00889)''TCONS_00020349,(K00889)''TCONS_00020349,(K00889)''TCONS_00003706,(K01092)''TCONS_00003706,(K01092)''TCONS_00003706,(K01092)''TCONS_00034329,(K00921)''TCONS_00034329,(K00921)''TCONS_00034329,(K00921)''TCONS_00008221,(K00888)''TCONS_00008221,(K00888)…
Metabolism	09101 Carbohydrate metabolism	Glyoxylate and dicarboxylate metabolism [PATH:ko00630]	82	'TCONS_00013898,(K15919)''TCONS_00013898,(K15919)''TCONS_00013898,(K15919)''TCONS_00013898,(K15919)''TCONS_00013898,(K15919)''TCONS_00012673,(K18121)''TCONS_00012673,(K18121)''TCONS_00014649,(K00600)''TCONS_00014649,(K00600)''TCONS_00014649,(K00600)''TCONS_00010688,(K00382)''TCONS_00010688,(K00382)''TCONS_00006512,(K14272)''TCONS_00006512,(K14272)''TCONS_00006512,(K14272)''TCONS_00006512,(K14272)…
Metabolism	09101 Carbohydrate metabolism	Fructose and mannose metabolism [PATH:ko00051]	81	'TCONS_00010118,(K05305)''TCONS_00010118,(K05305)''TCONS_00010118,(K05305)''TCONS_00010118,(K05305)''TCONS_00030080,(K01103)''TCONS_00030080,(K01103)''TCONS_00002428,(K00895)''TCONS_00005602,(K02377)''TCONS_00004809,(K00844)''TCONS_00004809,(K00844)''TCONS_00004809,(K00844)''TCONS_00004809,(K00844)''TCONS_00004809,(K00844)''TCONS_00011137,(K00847)''TCONS_00024052,(K01809)''TCONS_00024052,(K01809)…
Metabolism	09101 Carbohydrate metabolism	Galactose metabolism [PATH:ko00052]	78	'TCONS_00021509,(K01784)''TCONS_00021509,(K01784)''TCONS_00021509,(K01784)''TCONS_00004809,(K00844)''TCONS_00004809,(K00844)''TCONS_00004809,(K00844)''TCONS_00004809,(K00844)''TCONS_00004809,(K00844)''TCONS_00020736,(K06617)''TCONS_00020736,(K06617)''TCONS_00020736,(K06617)''TCONS_00001162,(K18819)''TCONS_00001162,(K18819)''TCONS_00001162,(K18819)''TCONS_00012680,(K12309)''TCONS_00012680,(K12309)…
Metabolism	09101 Carbohydrate metabolism	Ascorbate and aldarate metabolism [PATH:ko00053]	70	'TCONS_00024462,(K19642)''TCONS_00024462,(K19642)''TCONS_00017712,(K00225)''TCONS_00005402,(K00128)''TCONS_00005402,(K00128)''TCONS_00005402,(K00128)''TCONS_00005402,(K00128)''TCONS_00005402,(K00128)''TCONS_00005402,(K00128)''TCONS_00005402,(K00128)''TCONS_00035309,(K14085)''TCONS_00035309,(K14085)''TCONS_00035309,(K14085)''TCONS_00023887,(K08232)''TCONS_00021780,(K21888)''TCONS_00027528,(K00434)…
Metabolism	09101 Carbohydrate metabolism	Propanoate metabolism [PATH:ko00640]	67	'TCONS_00026141,(K02160)''TCONS_00026141,(K02160)''TCONS_00026141,(K02160)''TCONS_00026141,(K02160)''TCONS_00009294,(K00232)''TCONS_00020599,(K05605)''TCONS_00020599,(K05605)''TCONS_00020599,(K05605)''TCONS_00027541,(K00166)''TCONS_00027541,(K00166)''TCONS_00022210,(K11262)''TCONS_00022210,(K11262)''TCONS_00022210,(K11262)''TCONS_00022210,(K11262)''TCONS_00010688,(K00382)''TCONS_00010688,(K00382)…
Metabolism	09101 Carbohydrate metabolism	Citrate cycle (TCA cycle) [PATH:ko00020]	58	'TCONS_00026611,(K00161)''TCONS_00006502,(K01648)''TCONS_00006502,(K01648)''TCONS_00034515,(K00627)''TCONS_00010688,(K00382)''TCONS_00010688,(K00382)''TCONS_00034515,(K00627)''TCONS_00034515,(K00627)''TCONS_00034515,(K00627)''TCONS_00034515,(K00627)''TCONS_00034515,(K00627)''TCONS_00026611,(K00161)''TCONS_00026611,(K00161)''TCONS_00026611,(K00161)''TCONS_00026611,(K00161)''TCONS_00026558,(K01900)…
Metabolism	09101 Carbohydrate metabolism	Pentose phosphate pathway [PATH:ko00030]	56	'TCONS_00005568,(K00036)''TCONS_00005568,(K00036)''TCONS_00005568,(K00036)''TCONS_00005568,(K00036)''TCONS_00005568,(K00036)''TCONS_00005568,(K00036)''TCONS_00005568,(K00036)''TCONS_00002428,(K00895)''TCONS_00022907,(K01057)''TCONS_00022907,(K01057)''TCONS_00022907,(K01057)''TCONS_00022907,(K01057)''TCONS_00019416,(K00033)''TCONS_00025016,(K01807)''TCONS_00025016,(K01807)''TCONS_00025034,(K01623)…
Metabolism	09101 Carbohydrate metabolism	Pentose and glucuronate interconversions [PATH:ko00040]	55	'TCONS_00017906,(K01728)''TCONS_00017906,(K01728)''TCONS_00006088,(K01051)''TCONS_00006088,(K01051)''TCONS_00017906,(K01728)''TCONS_00024899,(K16190)''TCONS_00006088,(K01051)''TCONS_00017906,(K01728)''TCONS_00006088,(K01051)''TCONS_00006088,(K01051)''TCONS_00017906,(K01728)''TCONS_00006088,(K01051)''TCONS_00006088,(K01051)''TCONS_00017906,(K01728)''TCONS_00017906,(K01728)''TCONS_00017906,(K01728)…
Metabolism	09101 Carbohydrate metabolism	Butanoate metabolism [PATH:ko00650]	38	'TCONS_00012673,(K18121)''TCONS_00012673,(K18121)''TCONS_00029883,(K17761)''TCONS_00023658,(K01580)''TCONS_00023658,(K01580)''TCONS_00023658,(K01580)''TCONS_00023658,(K01580)''TCONS_00023658,(K01580)''TCONS_00023658,(K01580)''TCONS_00023658,(K01580)''TCONS_00015980,(K01640)''TCONS_00015980,(K01640)''TCONS_00015980,(K01640)''TCONS_00015980,(K01640)''TCONS_00015980,(K01640)''TCONS_00015980,(K01640)…
Metabolism	09101 Carbohydrate metabolism	C5-Branched dibasic acid metabolism [PATH:ko00660]	8	'TCONS_00004891,(K01653)''TCONS_00004891,(K01653)''TCONS_00021602,(K01704)''TCONS_00021602,(K01704)''TCONS_00016670,(K01703)''TCONS_00019044,(K00052)''TCONS_00019044,(K00052)''TCONS_00019044,(K00052)'
Metabolism	09102 Energy metabolism	Oxidative phosphorylation [PATH:ko00190]	118	'TCONS_00026617,(K01507)''TCONS_00026617,(K01507)''TCONS_00019283,(K02258)''TCONS_00019283,(K02258)''TCONS_00019283,(K02258)''TCONS_00019283,(K02258)''TCONS_00019283,(K02258)''TCONS_00019283,(K02258)''TCONS_00019283,(K02258)''TCONS_00019283,(K02258)''TCONS_00019283,(K02258)''TCONS_00022112,(K02148)''TCONS_00026617,(K01507)''TCONS_00032809,(K03941)''TCONS_00026617,(K01507)''TCONS_00006782,(K02267)…
Metabolism	09102 Energy metabolism	Methane metabolism [PATH:ko00680]	85	'TCONS_00032873,(K00058)''TCONS_00032873,(K00058)''TCONS_00032873,(K00058)''TCONS_00000226,(K01079)''TCONS_00000226,(K01079)''TCONS_00014649,(K00600)''TCONS_00014649,(K00600)''TCONS_00014649,(K00600)''TCONS_00006781,(K00121)''TCONS_00025052,(K01595)''TCONS_00025052,(K01595)''TCONS_00002750,(K01689)''TCONS_00002750,(K01689)''TCONS_00002750,(K01689)''TCONS_00002750,(K01689)''TCONS_00002750,(K01689)…
Metabolism	09102 Energy metabolism	Carbon fixation in photosynthetic organisms [PATH:ko00710]	70	'TCONS_00029886,(K00134)''TCONS_00029886,(K00134)''TCONS_00029886,(K00134)''TCONS_00029886,(K00134)''TCONS_00029886,(K00134)''TCONS_00029886,(K00134)''TCONS_00029886,(K00134)''TCONS_00021073,(K05298)''TCONS_00021073,(K05298)''TCONS_00025052,(K01595)''TCONS_00025052,(K01595)''TCONS_00006512,(K14272)''TCONS_00006512,(K14272)''TCONS_00006512,(K14272)''TCONS_00006512,(K14272)''TCONS_00025016,(K01807)…
Metabolism	09102 Energy metabolism	Carbon fixation pathways in prokaryotes [PATH:ko00720]	46	'TCONS_00026141,(K02160)''TCONS_00026141,(K02160)''TCONS_00026141,(K02160)''TCONS_00026141,(K02160)''TCONS_00006502,(K01648)''TCONS_00006502,(K01648)''TCONS_00025052,(K01595)''TCONS_00025052,(K01595)''TCONS_00017991,(K01962)''TCONS_00017991,(K01962)''TCONS_00005901,(K00297)''TCONS_00018993,(K01679)''TCONS_00033901,(K01681)''TCONS_00033901,(K01681)''TCONS_00033901,(K01681)''TCONS_00022464,(K00031)…
Metabolism	09102 Energy metabolism	Sulfur metabolism [PATH:ko00920]	44	'TCONS_00016334,(K13811)''TCONS_00016334,(K13811)''TCONS_00018486,(K17725)''TCONS_00018486,(K17725)''TCONS_00012079,(K00640)''TCONS_00010968,(K01011)''TCONS_00010968,(K01011)''TCONS_00018935,(K00860)''TCONS_00018935,(K00860)''TCONS_00018935,(K00860)''TCONS_00012484,(K01739)''TCONS_00003564,(K00387)''TCONS_00003564,(K00387)''TCONS_00003564,(K00387)''TCONS_00015901,(K01738)''TCONS_00015901,(K01738)…
Metabolism	09102 Energy metabolism	Nitrogen metabolism [PATH:ko00910]	36	'TCONS_00003567,(K01674)''TCONS_00003567,(K01674)''TCONS_00003567,(K01674)''TCONS_00003567,(K01674)''TCONS_00003567,(K01674)''TCONS_00003567,(K01674)''TCONS_00000980,(K02575)''TCONS_00000980,(K02575)''TCONS_00000980,(K02575)''TCONS_00003567,(K01674)''TCONS_00003567,(K01674)''TCONS_00006823,(K01673)''TCONS_00006823,(K01673)''TCONS_00006823,(K01673)''TCONS_00006823,(K01673)''TCONS_00006823,(K01673)…
Metabolism	09102 Energy metabolism	Photosynthesis [PATH:ko00195]	29	'TCONS_00010143,(K08901)''TCONS_00005075,(K02694)''TCONS_00013560,(K08905)''TCONS_00010990,(K02639)''TCONS_00022391,(K02717)''TCONS_00013605,(K02115)''TCONS_00010143,(K08901)''TCONS_00029142,(K02113)''TCONS_00031981,(K08906)''TCONS_00031981,(K08906)''TCONS_00028035,(K02701)''TCONS_00014208,(K02692)''TCONS_00022391,(K02717)''TCONS_00013605,(K02115)''TCONS_00013605,(K02115)''TCONS_00019498,(K03541)…
Metabolism	09102 Energy metabolism	Photosynthesis - antenna proteins [PATH:ko00196]	9	'TCONS_00004648,(K08908)''TCONS_00018880,(K14172)''TCONS_00018880,(K14172)''TCONS_00018880,(K14172)''TCONS_00018003,(K08915)''TCONS_00023423,(K08916)''TCONS_00004648,(K08908)''TCONS_00011671,(K08912)''TCONS_00024753,(K08907)'
Metabolism	09103 Lipid metabolism	Glycerophospholipid metabolism [PATH:ko00564]	189	'TCONS_00026030,(K13508)''TCONS_00030094,(K01114)''TCONS_00030094,(K01114)''TCONS_00030094,(K01114)''TCONS_00013523,(K13519)''TCONS_00000996,(K00993)''TCONS_00000996,(K00993)''TCONS_00000996,(K00993)''TCONS_00000996,(K00993)''TCONS_00000996,(K00993)''TCONS_00000996,(K00993)''TCONS_00000996,(K00993)''TCONS_00000996,(K00993)''TCONS_00000996,(K00993)''TCONS_00023031,(K18693)''TCONS_00023031,(K18693)…
Metabolism	09103 Lipid metabolism	Glycerolipid metabolism [PATH:ko00561]	111	'TCONS_00026030,(K13508)''TCONS_00013523,(K13519)''TCONS_00023031,(K18693)''TCONS_00023031,(K18693)''TCONS_00005402,(K00128)''TCONS_00005402,(K00128)''TCONS_00005402,(K00128)''TCONS_00005402,(K00128)''TCONS_00005402,(K00128)''TCONS_00005402,(K00128)''TCONS_00005402,(K00128)''TCONS_00035309,(K14085)''TCONS_00035309,(K14085)''TCONS_00035309,(K14085)''TCONS_00006692,(K13513)''TCONS_00006692,(K13513)…
Metabolism	09103 Lipid metabolism	Fatty acid biosynthesis [PATH:ko00061]	72	'TCONS_00026141,(K02160)''TCONS_00026141,(K02160)''TCONS_00026141,(K02160)''TCONS_00026141,(K02160)''TCONS_00000765,(K10781)''TCONS_00000765,(K10781)''TCONS_00000765,(K10781)''TCONS_00000765,(K10781)''TCONS_00000765,(K10781)''TCONS_00022210,(K11262)''TCONS_00022210,(K11262)''TCONS_00022210,(K11262)''TCONS_00022210,(K11262)''TCONS_00027336,(K03921)''TCONS_00027336,(K03921)''TCONS_00008212,(K01897)…
Metabolism	09103 Lipid metabolism	Sphingolipid metabolism [PATH:ko00600]	71	'TCONS_00007947,(K04713)''TCONS_00007947,(K04713)''TCONS_00007947,(K04713)''TCONS_00029615,(K01634)''TCONS_00029615,(K01634)''TCONS_00029615,(K01634)''TCONS_00029615,(K01634)''TCONS_00029615,(K01634)''TCONS_00029615,(K01634)''TCONS_00029615,(K01634)''TCONS_00029615,(K01634)''TCONS_00029615,(K01634)''TCONS_00029615,(K01634)''TCONS_00029615,(K01634)''TCONS_00029615,(K01634)''TCONS_00029615,(K01634)…
Metabolism	09103 Lipid metabolism	Fatty acid degradation [PATH:ko00071]	63	'TCONS_00009294,(K00232)''TCONS_00006781,(K00121)''TCONS_00005402,(K00128)''TCONS_00005402,(K00128)''TCONS_00005402,(K00128)''TCONS_00005402,(K00128)''TCONS_00005402,(K00128)''TCONS_00005402,(K00128)''TCONS_00005402,(K00128)''TCONS_00008212,(K01897)''TCONS_00035309,(K14085)''TCONS_00035309,(K14085)''TCONS_00035309,(K14085)''TCONS_00023815,(K00001)''TCONS_00034580,(K18857)''TCONS_00008212,(K01897)…
Metabolism	09103 Lipid metabolism	alpha-Linolenic acid metabolism [PATH:ko00592]	58	'TCONS_00009294,(K00232)''TCONS_00021042,(K10526)''TCONS_00021042,(K10526)''TCONS_00022684,(K00454)''TCONS_00022684,(K00454)''TCONS_00009171,(K05894)''TCONS_00009171,(K05894)''TCONS_00034580,(K18857)''TCONS_00004018,(K01047)''TCONS_00005864,(K07513)''TCONS_00005864,(K07513)''TCONS_00005864,(K07513)''TCONS_00005864,(K07513)''TCONS_00009294,(K00232)''TCONS_00016089,(K10529)''TCONS_00016089,(K10529)…
Metabolism	09103 Lipid metabolism	Linoleic acid metabolism [PATH:ko00591]	53	'TCONS_00005498,(K15718)''TCONS_00005498,(K15718)''TCONS_00005498,(K15718)''TCONS_00005498,(K15718)''TCONS_00005498,(K15718)''TCONS_00005498,(K15718)''TCONS_00005498,(K15718)''TCONS_00005498,(K15718)''TCONS_00005498,(K15718)''TCONS_00022684,(K00454)''TCONS_00022684,(K00454)''TCONS_00004018,(K01047)''TCONS_00005498,(K15718)''TCONS_00022684,(K00454)''TCONS_00020311,(K14674)''TCONS_00020311,(K14674)…
Metabolism	09103 Lipid metabolism	Ether lipid metabolism [PATH:ko00565]	53	'TCONS_00030094,(K01114)''TCONS_00030094,(K01114)''TCONS_00030094,(K01114)''TCONS_00013523,(K13519)''TCONS_00000996,(K00993)''TCONS_00000996,(K00993)''TCONS_00000996,(K00993)''TCONS_00000996,(K00993)''TCONS_00000996,(K00993)''TCONS_00000996,(K00993)''TCONS_00000996,(K00993)''TCONS_00000996,(K00993)''TCONS_00000996,(K00993)''TCONS_00016210,(K01115)''TCONS_00006702,(K13510)''TCONS_00006702,(K13510)…
Metabolism	09103 Lipid metabolism	Arachidonic acid metabolism [PATH:ko00590]	38	'TCONS_00023904,(K00432)''TCONS_00004018,(K01047)''TCONS_00023904,(K00432)''TCONS_00023904,(K00432)''TCONS_00023904,(K00432)''TCONS_00023904,(K00432)''TCONS_00005163,(K18592)''TCONS_00005163,(K18592)''TCONS_00005163,(K18592)''TCONS_00005163,(K18592)''TCONS_00005163,(K18592)''TCONS_00005163,(K18592)''TCONS_00005163,(K18592)''TCONS_00005163,(K18592)''TCONS_00020311,(K14674)''TCONS_00020311,(K14674)…
Metabolism	09103 Lipid metabolism	Fatty acid elongation [PATH:ko00062]	31	'TCONS_00008789,(K15397)''TCONS_00008600,(K10251)''TCONS_00008600,(K10251)''TCONS_00008789,(K15397)''TCONS_00008789,(K15397)''TCONS_00008789,(K15397)''TCONS_00008789,(K15397)''TCONS_00003483,(K07512)''TCONS_00003483,(K07512)''TCONS_00003483,(K07512)''TCONS_00003483,(K07512)''TCONS_00003483,(K07512)''TCONS_00003483,(K07512)''TCONS_00003483,(K07512)''TCONS_00003483,(K07512)''TCONS_00022427,(K10258)…
Metabolism	09103 Lipid metabolism	Biosynthesis of unsaturated fatty acids [PATH:ko01040]	26	'TCONS_00009294,(K00232)''TCONS_00027336,(K03921)''TCONS_00027336,(K03921)''TCONS_00008600,(K10251)''TCONS_00008600,(K10251)''TCONS_00005864,(K07513)''TCONS_00005864,(K07513)''TCONS_00005864,(K07513)''TCONS_00005864,(K07513)''TCONS_00009294,(K00232)''TCONS_00012287,(K10256)''TCONS_00009294,(K00232)''TCONS_00009294,(K00232)''TCONS_00009294,(K00232)''TCONS_00022427,(K10258)''TCONS_00009294,(K00232)…
Metabolism	09103 Lipid metabolism	Steroid biosynthesis [PATH:ko00100]	25	'TCONS_00001698,(K14424)''TCONS_00016898,(K05917)''TCONS_00016898,(K05917)''TCONS_00016898,(K05917)''TCONS_00016898,(K05917)''TCONS_00016363,(K08242)''TCONS_00033537,(K00213)''TCONS_00008663,(K00511)''TCONS_00027421,(K07748)''TCONS_00027421,(K07748)''TCONS_00027421,(K07748)''TCONS_00012044,(K00222)''TCONS_00012044,(K00222)''TCONS_00012044,(K00222)''TCONS_00013486,(K14423)''TCONS_00020311,(K14674)…
Metabolism	09103 Lipid metabolism	Cutin, suberine and wax biosynthesis [PATH:ko00073]	21	'TCONS_00015928,(K13407)''TCONS_00029990,(K13356)''TCONS_00010349,(K15404)''TCONS_00023231,(K17991)''TCONS_00023231,(K17991)''TCONS_00021525,(K15403)''TCONS_00021525,(K15403)''TCONS_00028954,(K15398)''TCONS_00029990,(K13356)''TCONS_00029990,(K13356)''TCONS_00015265,(K15402)''TCONS_00015265,(K15402)''TCONS_00015265,(K15402)''TCONS_00015265,(K15402)''TCONS_00015265,(K15402)''TCONS_00015265,(K15402)…
Metabolism	09103 Lipid metabolism	Synthesis and degradation of ketone bodies [PATH:ko00072]	16	'TCONS_00015980,(K01640)''TCONS_00015980,(K01640)''TCONS_00015980,(K01640)''TCONS_00015980,(K01640)''TCONS_00015980,(K01640)''TCONS_00015980,(K01640)''TCONS_00015980,(K01640)''TCONS_00015980,(K01640)''TCONS_00015980,(K01640)''TCONS_00013503,(K01641)''TCONS_00001137,(K00626)''TCONS_00001137,(K00626)''TCONS_00001137,(K00626)''TCONS_00001137,(K00626)''TCONS_00001137,(K00626)''TCONS_00001137,(K00626)'
Metabolism	09103 Lipid metabolism	Steroid hormone biosynthesis [PATH:ko00140]	7	'TCONS_00008600,(K10251)''TCONS_00008600,(K10251)''TCONS_00033702,(K12345)''TCONS_00033702,(K12345)''TCONS_00033702,(K12345)''TCONS_00025539,(K12344)''TCONS_00025537,(K12343)'
Metabolism	09103 Lipid metabolism	Secondary bile acid biosynthesis [PATH:ko00121]	3	'TCONS_00023287,(K07007)''TCONS_00023287,(K07007)''TCONS_00023287,(K07007)'
Metabolism	09103 Lipid metabolism	Primary bile acid biosynthesis [PATH:ko00120]	2	'TCONS_00010234,(K11992)''TCONS_00020807,(K12405)'
Metabolism	09104 Nucleotide metabolism	Purine metabolism [PATH:ko00230]	175	'TCONS_00021468,(K01951)''TCONS_00009984,(K01945)''TCONS_00009984,(K01945)''TCONS_00016334,(K13811)''TCONS_00016334,(K13811)''TCONS_00008692,(K00759)''TCONS_00008692,(K00759)''TCONS_00022681,(K01427)''TCONS_00022681,(K01427)''TCONS_00022681,(K01427)''TCONS_00024336,(K01952)''TCONS_00024336,(K01952)''TCONS_00024336,(K01952)''TCONS_00008692,(K00759)''TCONS_00008692,(K00759)''TCONS_00007944,(K01510)…
Metabolism	09104 Nucleotide metabolism	Pyrimidine metabolism [PATH:ko00240]	93	'TCONS_00034309,(K01955)''TCONS_00034309,(K01955)''TCONS_00034315,(K00876)''TCONS_00034315,(K00876)''TCONS_00034315,(K00876)''TCONS_00007944,(K01510)''TCONS_00007944,(K01510)''TCONS_00007944,(K01510)''TCONS_00002046,(K01489)''TCONS_00028071,(K10807)''TCONS_00029917,(K06966)''TCONS_00029917,(K06966)''TCONS_00029917,(K06966)''TCONS_00031026,(K01240)''TCONS_00031026,(K01240)''TCONS_00003111,(K00207)…
Metabolism	09105 Amino acid metabolism	Cysteine and methionine metabolism [PATH:ko00270]	118	'TCONS_00032873,(K00058)''TCONS_00002140,(K00549)''TCONS_00002140,(K00549)''TCONS_00002140,(K00549)''TCONS_00002140,(K00549)''TCONS_00032873,(K00058)''TCONS_00032873,(K00058)''TCONS_00014595,(K00899)''TCONS_00012079,(K00640)''TCONS_00013274,(K01761)''TCONS_00013274,(K01761)''TCONS_00004728,(K00558)''TCONS_00018160,(K05933)''TCONS_00018160,(K05933)''TCONS_00018160,(K05933)''TCONS_00018160,(K05933)…
Metabolism	09105 Amino acid metabolism	Glycine, serine and threonine metabolism [PATH:ko00260]	116	'TCONS_00023377,(K06001)''TCONS_00023377,(K06001)''TCONS_00023377,(K06001)''TCONS_00023377,(K06001)''TCONS_00023377,(K06001)''TCONS_00023377,(K06001)''TCONS_00023377,(K06001)''TCONS_00023377,(K06001)''TCONS_00023377,(K06001)''TCONS_00032873,(K00058)''TCONS_00032730,(K00276)''TCONS_00004981,(K01620)''TCONS_00004981,(K01620)''TCONS_00004981,(K01620)''TCONS_00004981,(K01620)''TCONS_00004981,(K01620)…
Metabolism	09105 Amino acid metabolism	Valine, leucine and isoleucine degradation [PATH:ko00280]	104	'TCONS_00020599,(K05605)''TCONS_00020599,(K05605)''TCONS_00020599,(K05605)''TCONS_00027541,(K00166)''TCONS_00027541,(K00166)''TCONS_00005402,(K00128)''TCONS_00005402,(K00128)''TCONS_00005402,(K00128)''TCONS_00005402,(K00128)''TCONS_00005402,(K00128)''TCONS_00005402,(K00128)''TCONS_00005402,(K00128)''TCONS_00010688,(K00382)''TCONS_00010688,(K00382)''TCONS_00035309,(K14085)''TCONS_00035309,(K14085)…
Metabolism	09105 Amino acid metabolism	Arginine and proline metabolism [PATH:ko00330]	91	'TCONS_00004465,(K01426)''TCONS_00004465,(K01426)''TCONS_00004465,(K01426)''TCONS_00004465,(K01426)''TCONS_00005381,(K00472)''TCONS_00005381,(K00472)''TCONS_00005381,(K00472)''TCONS_00005381,(K00472)''TCONS_00005402,(K00128)''TCONS_00005402,(K00128)''TCONS_00005402,(K00128)''TCONS_00005402,(K00128)''TCONS_00005402,(K00128)''TCONS_00005402,(K00128)''TCONS_00005402,(K00128)''TCONS_00035309,(K14085)…
Metabolism	09105 Amino acid metabolism	Phenylalanine, tyrosine and tryptophan biosynthesis [PATH:ko00400]	85	'TCONS_00023377,(K06001)''TCONS_00023377,(K06001)''TCONS_00023377,(K06001)''TCONS_00023377,(K06001)''TCONS_00023377,(K06001)''TCONS_00023377,(K06001)''TCONS_00023377,(K06001)''TCONS_00023377,(K06001)''TCONS_00023377,(K06001)''TCONS_00025237,(K00766)''TCONS_00021907,(K01817)''TCONS_00003615,(K05359)''TCONS_00003615,(K05359)''TCONS_00003615,(K05359)''TCONS_00003615,(K05359)''TCONS_00003615,(K05359)…
Metabolism	09105 Amino acid metabolism	Lysine degradation [PATH:ko00310]	70	'TCONS_00005402,(K00128)''TCONS_00005402,(K00128)''TCONS_00005402,(K00128)''TCONS_00029125,(K11426)''TCONS_00005402,(K00128)''TCONS_00005402,(K00128)''TCONS_00005402,(K00128)''TCONS_00005402,(K00128)''TCONS_00010688,(K00382)''TCONS_00010688,(K00382)''TCONS_00035309,(K14085)''TCONS_00035309,(K14085)''TCONS_00035309,(K14085)''TCONS_00029125,(K11426)''TCONS_00029125,(K11426)''TCONS_00029125,(K11426)…
Metabolism	09105 Amino acid metabolism	Alanine, aspartate and glutamate metabolism [PATH:ko00250]	69	'TCONS_00034309,(K01955)''TCONS_00034309,(K01955)''TCONS_00006512,(K14272)''TCONS_00006512,(K14272)''TCONS_00006512,(K14272)''TCONS_00006512,(K14272)''TCONS_00015213,(K00814)''TCONS_00015213,(K00814)''TCONS_00015213,(K00814)''TCONS_00015213,(K00814)''TCONS_00015213,(K00814)''TCONS_00029883,(K17761)''TCONS_00023658,(K01580)''TCONS_00023658,(K01580)''TCONS_00023658,(K01580)''TCONS_00023658,(K01580)…
Metabolism	09105 Amino acid metabolism	Tryptophan metabolism [PATH:ko00380]	63	'TCONS_00014079,(K11816)''TCONS_00004465,(K01426)''TCONS_00004465,(K01426)''TCONS_00004465,(K01426)''TCONS_00004465,(K01426)''TCONS_00005402,(K00128)''TCONS_00005402,(K00128)''TCONS_00005402,(K00128)''TCONS_00005402,(K00128)''TCONS_00005402,(K00128)''TCONS_00005402,(K00128)''TCONS_00005402,(K00128)''TCONS_00010688,(K00382)''TCONS_00010688,(K00382)''TCONS_00014079,(K11816)''TCONS_00014079,(K11816)…
Metabolism	09105 Amino acid metabolism	Arginine biosynthesis [PATH:ko00220]	57	'TCONS_00022681,(K01427)''TCONS_00022681,(K01427)''TCONS_00022681,(K01427)''TCONS_00006512,(K14272)''TCONS_00006512,(K14272)''TCONS_00006512,(K14272)''TCONS_00006512,(K14272)''TCONS_00015213,(K00814)''TCONS_00015213,(K00814)''TCONS_00015213,(K00814)''TCONS_00015213,(K00814)''TCONS_00015213,(K00814)''TCONS_00006044,(K00145)''TCONS_00006044,(K00145)''TCONS_00000976,(K14455)''TCONS_00000976,(K14455)…
Metabolism	09105 Amino acid metabolism	Histidine metabolism [PATH:ko00340]	51	'TCONS_00025121,(K00765)''TCONS_00025121,(K00765)''TCONS_00005402,(K00128)''TCONS_00005402,(K00128)''TCONS_00005402,(K00128)''TCONS_00024693,(K11755)''TCONS_00024693,(K11755)''TCONS_00024693,(K11755)''TCONS_00024693,(K11755)''TCONS_00024693,(K11755)''TCONS_00024693,(K11755)''TCONS_00024693,(K11755)''TCONS_00029369,(K01590)''TCONS_00029369,(K01590)''TCONS_00029369,(K01590)''TCONS_00029369,(K01590)…
Metabolism	09105 Amino acid metabolism	Tyrosine metabolism [PATH:ko00350]	43	'TCONS_00032730,(K00276)''TCONS_00020604,(K00457)''TCONS_00020604,(K00457)''TCONS_00020604,(K00457)''TCONS_00006781,(K00121)''TCONS_00032730,(K00276)''TCONS_00032730,(K00276)''TCONS_00032730,(K00276)''TCONS_00023815,(K00001)''TCONS_00034511,(K00817)''TCONS_00034511,(K00817)''TCONS_00034580,(K18857)''TCONS_00015110,(K01592)''TCONS_00015110,(K01592)''TCONS_00015110,(K01592)''TCONS_00015110,(K01592)…
Metabolism	09105 Amino acid metabolism	Phenylalanine metabolism [PATH:ko00360]	43	'TCONS_00032730,(K00276)''TCONS_00020604,(K00457)''TCONS_00020604,(K00457)''TCONS_00020604,(K00457)''TCONS_00004465,(K01426)''TCONS_00004465,(K01426)''TCONS_00004465,(K01426)''TCONS_00004465,(K01426)''TCONS_00032730,(K00276)''TCONS_00032730,(K00276)''TCONS_00032730,(K00276)''TCONS_00034511,(K00817)''TCONS_00034511,(K00817)''TCONS_00000976,(K14455)''TCONS_00000976,(K14455)''TCONS_00000976,(K14455)…
Metabolism	09105 Amino acid metabolism	Valine, leucine and isoleucine biosynthesis [PATH:ko00290]	17	'TCONS_00011172,(K01649)''TCONS_00004891,(K01653)''TCONS_00004891,(K01653)''TCONS_00021602,(K01704)''TCONS_00021602,(K01704)''TCONS_00031002,(K01754)''TCONS_00031002,(K01754)''TCONS_00031002,(K01754)''TCONS_00010408,(K01687)''TCONS_00033976,(K00053)''TCONS_00016670,(K01703)''TCONS_00031346,(K00826)''TCONS_00031346,(K00826)''TCONS_00031346,(K00826)''TCONS_00019044,(K00052)''TCONS_00019044,(K00052)…
Metabolism	09105 Amino acid metabolism	Lysine biosynthesis [PATH:ko00300]	17	'TCONS_00007156,(K10206)''TCONS_00013917,(K01714)''TCONS_00024670,(K00928)''TCONS_00024670,(K00928)''TCONS_00017907,(K01778)''TCONS_00034341,(K00215)''TCONS_00007156,(K10206)''TCONS_00007156,(K10206)''TCONS_00007156,(K10206)''TCONS_00008250,(K01586)''TCONS_00024670,(K00928)''TCONS_00004715,(K12524)''TCONS_00023895,(K01928)''TCONS_00013917,(K01714)''TCONS_00013917,(K01714)''TCONS_00023558,(K00133)…
Metabolism	09106 Metabolism of other amino acids	Glutathione metabolism [PATH:ko00480]	113	'TCONS_00005568,(K00036)''TCONS_00005568,(K00036)''TCONS_00005568,(K00036)''TCONS_00005568,(K00036)''TCONS_00005568,(K00036)''TCONS_00005568,(K00036)''TCONS_00005568,(K00036)''TCONS_00006036,(K07232)''TCONS_00006036,(K07232)''TCONS_00023904,(K00432)''TCONS_00021463,(K01256)''TCONS_00021463,(K01256)''TCONS_00019416,(K00033)''TCONS_00021780,(K21888)''TCONS_00027528,(K00434)''TCONS_00027528,(K00434)…
Metabolism	09106 Metabolism of other amino acids	beta-Alanine metabolism [PATH:ko00410]	67	'TCONS_00032730,(K00276)''TCONS_00009294,(K00232)''TCONS_00020599,(K05605)''TCONS_00020599,(K05605)''TCONS_00020599,(K05605)''TCONS_00005402,(K00128)''TCONS_00005402,(K00128)''TCONS_00005402,(K00128)''TCONS_00005402,(K00128)''TCONS_00005402,(K00128)''TCONS_00005402,(K00128)''TCONS_00005402,(K00128)''TCONS_00035309,(K14085)''TCONS_00035309,(K14085)''TCONS_00035309,(K14085)''TCONS_00032730,(K00276)…
Metabolism	09106 Metabolism of other amino acids	Cyanoamino acid metabolism [PATH:ko00460]	51	'TCONS_00004821,(K14984)''TCONS_00028306,(K16266)''TCONS_00018980,(K01188)''TCONS_00014649,(K00600)''TCONS_00014649,(K00600)''TCONS_00014649,(K00600)''TCONS_00018980,(K01188)''TCONS_00018980,(K01188)''TCONS_00007755,(K08248)''TCONS_00018633,(K13051)''TCONS_00018633,(K13051)''TCONS_00003095,(K05350)''TCONS_00003095,(K05350)''TCONS_00003095,(K05350)''TCONS_00014649,(K00600)''TCONS_00005163,(K18592)…
Metabolism	09106 Metabolism of other amino acids	Selenocompound metabolism [PATH:ko00450]	47	'TCONS_00002140,(K00549)''TCONS_00002140,(K00549)''TCONS_00002140,(K00549)''TCONS_00002140,(K00549)''TCONS_00027824,(K11717)''TCONS_00027824,(K11717)''TCONS_00027824,(K11717)''TCONS_00016334,(K13811)''TCONS_00016334,(K13811)''TCONS_00013274,(K01761)''TCONS_00013274,(K01761)''TCONS_00009457,(K00384)''TCONS_00009457,(K00384)''TCONS_00009457,(K00384)''TCONS_00009457,(K00384)''TCONS_00012484,(K01739)…
Metabolism	09106 Metabolism of other amino acids	Taurine and hypotaurine metabolism [PATH:ko00430]	27	'TCONS_00002752,(K10712)''TCONS_00002752,(K10712)''TCONS_00023658,(K01580)''TCONS_00023658,(K01580)''TCONS_00023658,(K01580)''TCONS_00023658,(K01580)''TCONS_00023658,(K01580)''TCONS_00023658,(K01580)''TCONS_00023658,(K01580)''TCONS_00002752,(K10712)''TCONS_00002752,(K10712)''TCONS_00002752,(K10712)''TCONS_00002752,(K10712)''TCONS_00002752,(K10712)''TCONS_00002752,(K10712)''TCONS_00005163,(K18592)…
Metabolism	09106 Metabolism of other amino acids	Phosphonate and phosphinate metabolism [PATH:ko00440]	13	'TCONS_00000996,(K00993)''TCONS_00000996,(K00993)''TCONS_00000996,(K00993)''TCONS_00000996,(K00993)''TCONS_00000996,(K00993)''TCONS_00000996,(K00993)''TCONS_00000996,(K00993)''TCONS_00000996,(K00993)''TCONS_00000996,(K00993)''TCONS_00018476,(K00968)''TCONS_00004021,(K00967)''TCONS_00004021,(K00967)''TCONS_00004021,(K00967)'
Metabolism	09106 Metabolism of other amino acids	D-Glutamine and D-glutamate metabolism [PATH:ko00471]	8	'TCONS_00019243,(K00261)''TCONS_00019243,(K00261)''TCONS_00019243,(K00261)''TCONS_00019243,(K00261)''TCONS_00019243,(K00261)''TCONS_00019243,(K00261)''TCONS_00019243,(K00261)''TCONS_00019243,(K00261)'
Metabolism	09106 Metabolism of other amino acids	D-Alanine metabolism [PATH:ko00473]	1	'TCONS_00011799,(K01921)'
Metabolism	09107 Glycan biosynthesis and metabolism	N-Glycan biosynthesis [PATH:ko00510]	75	'TCONS_00026506,(K03847)''TCONS_00026506,(K03847)''TCONS_00024582,(K03842)''TCONS_00020698,(K03846)''TCONS_00021051,(K00721)''TCONS_00031892,(K01230)''TCONS_00003132,(K07151)''TCONS_00031892,(K01230)''TCONS_00031714,(K12669)''TCONS_00025165,(K01228)''TCONS_00013329,(K09658)''TCONS_00030449,(K12666)''TCONS_00030449,(K12666)''TCONS_00032214,(K00736)''TCONS_00033702,(K12345)''TCONS_00033702,(K12345)…
Metabolism	09107 Glycan biosynthesis and metabolism	Various types of N-glycan biosynthesis [PATH:ko00513]	64	'TCONS_00026506,(K03847)''TCONS_00026506,(K03847)''TCONS_00035560,(K12373)''TCONS_00024582,(K03842)''TCONS_00020698,(K03846)''TCONS_00022858,(K14413)''TCONS_00022858,(K14413)''TCONS_00031892,(K01230)''TCONS_00003132,(K07151)''TCONS_00014609,(K00753)''TCONS_00014609,(K00753)''TCONS_00014609,(K00753)''TCONS_00031892,(K01230)''TCONS_00031714,(K12669)''TCONS_00035560,(K12373)''TCONS_00026326,(K14412)…
Metabolism	09107 Glycan biosynthesis and metabolism	Glycosylphosphatidylinositol (GPI)-anchor biosynthesis [PATH:ko00563]	56	'TCONS_00010351,(K03861)''TCONS_00013329,(K09658)''TCONS_00001195,(K03859)''TCONS_00001195,(K03859)''TCONS_00001195,(K03859)''TCONS_00001195,(K03859)''TCONS_00001195,(K03859)''TCONS_00002180,(K03857)''TCONS_00002180,(K03857)''TCONS_00009560,(K05283)''TCONS_00009560,(K05283)''TCONS_00009560,(K05283)''TCONS_00009560,(K05283)''TCONS_00009560,(K05283)''TCONS_00032114,(K05284)''TCONS_00032114,(K05284)…
Metabolism	09107 Glycan biosynthesis and metabolism	Other glycan degradation [PATH:ko00511]	45	'TCONS_00035560,(K12373)''TCONS_00035560,(K12373)''TCONS_00012680,(K12309)''TCONS_00012680,(K12309)''TCONS_00012680,(K12309)''TCONS_00012680,(K12309)''TCONS_00012680,(K12309)''TCONS_00026921,(K01206)''TCONS_00024333,(K01227)''TCONS_00024333,(K01227)''TCONS_00024333,(K01227)''TCONS_00024333,(K01227)''TCONS_00024333,(K01227)''TCONS_00024333,(K01227)''TCONS_00035560,(K12373)''TCONS_00035560,(K12373)…
Metabolism	09107 Glycan biosynthesis and metabolism	Other types of O-glycan biosynthesis [PATH:ko00514]	35	'TCONS_00034445,(K20783)''TCONS_00034445,(K20783)''TCONS_00020313,(K20784)''TCONS_00020313,(K20784)''TCONS_00020313,(K20784)''TCONS_00020313,(K20784)''TCONS_00015054,(K20781)''TCONS_00015054,(K20781)''TCONS_00015054,(K20781)''TCONS_00015054,(K20781)''TCONS_00015054,(K20781)''TCONS_00015054,(K20781)''TCONS_00000714,(K09667)''TCONS_00000714,(K09667)''TCONS_00000714,(K09667)''TCONS_00000714,(K09667)…
Metabolism	09107 Glycan biosynthesis and metabolism	O-Antigen nucleotide sugar biosynthesis [PATH:ko00541]	30	'TCONS_00009747,(K08679)''TCONS_00009747,(K08679)''TCONS_00021509,(K01784)''TCONS_00021509,(K01784)''TCONS_00021509,(K01784)''TCONS_00005602,(K02377)''TCONS_00024052,(K01809)''TCONS_00024052,(K01809)''TCONS_00024052,(K01809)''TCONS_00024052,(K01809)''TCONS_00024052,(K01809)''TCONS_00009747,(K08679)''TCONS_00009747,(K08679)''TCONS_00019359,(K01711)''TCONS_00019359,(K01711)''TCONS_00019359,(K01711)…
Metabolism	09107 Glycan biosynthesis and metabolism	Glycosaminoglycan degradation [PATH:ko00531]	26	'TCONS_00035560,(K12373)''TCONS_00035560,(K12373)''TCONS_00012680,(K12309)''TCONS_00012680,(K12309)''TCONS_00012680,(K12309)''TCONS_00012680,(K12309)''TCONS_00012680,(K12309)''TCONS_00035560,(K12373)''TCONS_00035560,(K12373)''TCONS_00000142,(K01205)''TCONS_00000142,(K01205)''TCONS_00000142,(K01205)''TCONS_00000142,(K01205)''TCONS_00000142,(K01205)''TCONS_00000142,(K01205)''TCONS_00000142,(K01205)…
Metabolism	09107 Glycan biosynthesis and metabolism	Lipopolysaccharide biosynthesis [PATH:ko00540]	21	'TCONS_00021191,(K02535)''TCONS_00021191,(K02535)''TCONS_00013658,(K00979)''TCONS_00013658,(K00979)''TCONS_00001649,(K01627)''TCONS_00001649,(K01627)''TCONS_00001649,(K01627)''TCONS_00032686,(K00912)''TCONS_00032686,(K00912)''TCONS_00014857,(K06041)''TCONS_00014857,(K06041)''TCONS_00002038,(K00677)''TCONS_00002038,(K00677)''TCONS_00002038,(K00677)''TCONS_00002038,(K00677)''TCONS_00002038,(K00677)…
Metabolism	09107 Glycan biosynthesis and metabolism	Glycosphingolipid biosynthesis - ganglio series [PATH:ko00604]	9	'TCONS_00035560,(K12373)''TCONS_00035560,(K12373)''TCONS_00012680,(K12309)''TCONS_00012680,(K12309)''TCONS_00012680,(K12309)''TCONS_00012680,(K12309)''TCONS_00012680,(K12309)''TCONS_00035560,(K12373)''TCONS_00035560,(K12373)'
Metabolism	09107 Glycan biosynthesis and metabolism	Glycosphingolipid biosynthesis - globo and isoglobo series [PATH:ko00603]	8	'TCONS_00035560,(K12373)''TCONS_00035560,(K12373)''TCONS_00035560,(K12373)''TCONS_00035560,(K12373)''TCONS_00021940,(K07407)''TCONS_00021940,(K07407)''TCONS_00021940,(K07407)''TCONS_00011855,(K01988)'
Metabolism	09107 Glycan biosynthesis and metabolism	Mannose type O-glycan biosynthesis [PATH:ko00515]	6	'TCONS_00009898,(K18207)''TCONS_00009898,(K18207)''TCONS_00009898,(K18207)''TCONS_00009898,(K18207)''TCONS_00009898,(K18207)''TCONS_00009898,(K18207)'
Metabolism	09107 Glycan biosynthesis and metabolism	Peptidoglycan biosynthesis [PATH:ko00550]	3	'TCONS_00023895,(K01928)''TCONS_00003081,(K02563)''TCONS_00011799,(K01921)'
Metabolism	09107 Glycan biosynthesis and metabolism	Glycosphingolipid biosynthesis - lacto and neolacto series [PATH:ko00601]	1	'TCONS_00011855,(K01988)'
Metabolism	09108 Metabolism of cofactors and vitamins	Folate biosynthesis [PATH:ko00790]	94	'TCONS_00006265,(K15631)''TCONS_00006265,(K15631)''TCONS_00032938,(K03637)''TCONS_00032938,(K03637)''TCONS_00032938,(K03637)''TCONS_00032938,(K03637)''TCONS_00032938,(K03637)''TCONS_00032938,(K03637)''TCONS_00006265,(K15631)''TCONS_00006265,(K15631)''TCONS_00020688,(K01307)''TCONS_00020688,(K01307)''TCONS_00033407,(K03639)''TCONS_00033407,(K03639)''TCONS_00033407,(K03639)''TCONS_00033407,(K03639)…
Metabolism	09108 Metabolism of cofactors and vitamins	Pantothenate and CoA biosynthesis [PATH:ko00770]	72	'TCONS_00027554,(K01922)''TCONS_00027554,(K01922)''TCONS_00005402,(K00128)''TCONS_00005402,(K00128)''TCONS_00005402,(K00128)''TCONS_00005402,(K00128)''TCONS_00005402,(K00128)''TCONS_00005402,(K00128)''TCONS_00005402,(K00128)''TCONS_00000057,(K01598)''TCONS_00022763,(K09680)''TCONS_00014302,(K02201)''TCONS_00014302,(K02201)''TCONS_00014302,(K02201)''TCONS_00014302,(K02201)''TCONS_00014302,(K02201)…
Metabolism	09108 Metabolism of cofactors and vitamins	Porphyrin and chlorophyll metabolism [PATH:ko00860]	70	'TCONS_00002702,(K10960)''TCONS_00024718,(K08099)''TCONS_00030592,(K13600)''TCONS_00009179,(K01698)''TCONS_00009179,(K01698)''TCONS_00002702,(K10960)''TCONS_00006665,(K01719)''TCONS_00006665,(K01719)''TCONS_00006665,(K01719)''TCONS_00006665,(K01719)''TCONS_00003892,(K21480)''TCONS_00010339,(K02257)''TCONS_00010339,(K02257)''TCONS_00010339,(K02257)''TCONS_00010339,(K02257)''TCONS_00004818,(K08101)…
Metabolism	09108 Metabolism of cofactors and vitamins	Nicotinate and nicotinamide metabolism [PATH:ko00760]	63	'TCONS_00009072,(K19189)''TCONS_00017023,(K20454)''TCONS_00017023,(K20454)''TCONS_00027514,(K00858)''TCONS_00027514,(K00858)''TCONS_00023850,(K01950)''TCONS_00027514,(K00858)''TCONS_00035466,(K00767)''TCONS_00035466,(K00767)''TCONS_00008352,(K00763)''TCONS_00008352,(K00763)''TCONS_00008352,(K00763)''TCONS_00031026,(K01240)''TCONS_00031026,(K01240)''TCONS_00027514,(K00858)''TCONS_00027514,(K00858)…
Metabolism	09108 Metabolism of cofactors and vitamins	Ubiquinone and other terpenoid-quinone biosynthesis [PATH:ko00130]	62	'TCONS_00020604,(K00457)''TCONS_00020604,(K00457)''TCONS_00020604,(K00457)''TCONS_00006509,(K03183)''TCONS_00028844,(K14760)''TCONS_00028844,(K14760)''TCONS_00022761,(K01661)''TCONS_00032440,(K02548)''TCONS_00022662,(K01904)''TCONS_00022662,(K01904)''TCONS_00022662,(K01904)''TCONS_00022662,(K01904)''TCONS_00007289,(K05928)''TCONS_00007289,(K05928)''TCONS_00022662,(K01904)''TCONS_00025413,(K14759)…
Metabolism	09108 Metabolism of cofactors and vitamins	Thiamine metabolism [PATH:ko00730]	45	'TCONS_00033210,(K00949)''TCONS_00033210,(K00949)''TCONS_00033210,(K00949)''TCONS_00033210,(K00949)''TCONS_00022022,(K14153)''TCONS_00022022,(K14153)''TCONS_00022022,(K14153)''TCONS_00001729,(K03147)''TCONS_00017886,(K00939)''TCONS_00017886,(K00939)''TCONS_00017886,(K00939)''TCONS_00017886,(K00939)''TCONS_00017886,(K00939)''TCONS_00017886,(K00939)''TCONS_00006988,(K01662)''TCONS_00006988,(K01662)…
Metabolism	09108 Metabolism of cofactors and vitamins	Riboflavin metabolism [PATH:ko00740]	33	'TCONS_00022509,(K14379)''TCONS_00022509,(K14379)''TCONS_00015813,(K18453)''TCONS_00027468,(K00794)''TCONS_00027468,(K00794)''TCONS_00004906,(K11752)''TCONS_00004906,(K11752)''TCONS_00004906,(K11752)''TCONS_00004906,(K11752)''TCONS_00004906,(K11752)''TCONS_00004906,(K11752)''TCONS_00004906,(K11752)''TCONS_00003428,(K20884)''TCONS_00003428,(K20884)''TCONS_00003428,(K20884)''TCONS_00003428,(K20884)…
Metabolism	09108 Metabolism of cofactors and vitamins	One carbon pool by folate [PATH:ko00670]	33	'TCONS_00014649,(K00600)''TCONS_00014649,(K00600)''TCONS_00014649,(K00600)''TCONS_00029351,(K01934)''TCONS_00005901,(K00297)''TCONS_00014649,(K00600)''TCONS_00013437,(K01433)''TCONS_00014649,(K00600)''TCONS_00014649,(K00600)''TCONS_00014649,(K00600)''TCONS_00029351,(K01934)''TCONS_00029351,(K01934)''TCONS_00029351,(K01934)''TCONS_00014649,(K00600)''TCONS_00014649,(K00600)''TCONS_00003309,(K00602)…
Metabolism	09108 Metabolism of cofactors and vitamins	Biotin metabolism [PATH:ko00780]	21	'TCONS_00002109,(K09458)''TCONS_00002109,(K09458)''TCONS_00002109,(K09458)''TCONS_00002109,(K09458)''TCONS_00002179,(K00208)''TCONS_00002179,(K00208)''TCONS_00014935,(K01942)''TCONS_00026242,(K01012)''TCONS_00026242,(K01012)''TCONS_00012637,(K00059)''TCONS_00012637,(K00059)''TCONS_00012637,(K00059)''TCONS_00023788,(K00652)''TCONS_00002109,(K09458)''TCONS_00001441,(K19562)''TCONS_00012637,(K00059)…
Metabolism	09108 Metabolism of cofactors and vitamins	Vitamin B6 metabolism [PATH:ko00750]	15	'TCONS_00035357,(K13248)''TCONS_00035357,(K13248)''TCONS_00035357,(K13248)''TCONS_00035357,(K13248)''TCONS_00009482,(K00831)''TCONS_00009482,(K00831)''TCONS_00014850,(K00868)''TCONS_00014850,(K00868)''TCONS_00014850,(K00868)''TCONS_00013021,(K00275)''TCONS_00013021,(K00275)''TCONS_00023708,(K05275)''TCONS_00029906,(K08681)''TCONS_00004617,(K01733)''TCONS_00004617,(K01733)'
Metabolism	09108 Metabolism of cofactors and vitamins	Retinol metabolism [PATH:ko00830]	7	'TCONS_00006781,(K00121)''TCONS_00023815,(K00001)''TCONS_00006781,(K00121)''TCONS_00006781,(K00121)''TCONS_00006781,(K00121)''TCONS_00006781,(K00121)''TCONS_00000365,(K11152)'
Metabolism	09108 Metabolism of cofactors and vitamins	Lipoic acid metabolism [PATH:ko00785]	5	'TCONS_00004750,(K03801)''TCONS_00004750,(K03801)''TCONS_00022582,(K03644)''TCONS_00000394,(K03800)''TCONS_00000394,(K03800)'
Metabolism	09109 Metabolism of terpenoids and polyketides	Terpenoid backbone biosynthesis [PATH:ko00900]	64	'TCONS_00002702,(K10960)''TCONS_00016597,(K00938)''TCONS_00019389,(K01770)''TCONS_00002702,(K10960)''TCONS_00019529,(K05356)''TCONS_00010011,(K00991)''TCONS_00010011,(K00991)''TCONS_00028807,(K14066)''TCONS_00028807,(K14066)''TCONS_00028807,(K14066)''TCONS_00015703,(K08658)''TCONS_00007875,(K01823)''TCONS_00025570,(K01597)''TCONS_00010198,(K06013)''TCONS_00010198,(K06013)''TCONS_00013503,(K01641)…
Metabolism	09109 Metabolism of terpenoids and polyketides	Monoterpenoid biosynthesis [PATH:ko00902]	46	'TCONS_00020647,(K13400)''TCONS_00020647,(K13400)''TCONS_00022972,(K20986)''TCONS_00016469,(K21374)''TCONS_00016469,(K21374)''TCONS_00016469,(K21374)''TCONS_00016469,(K21374)''TCONS_00016469,(K21374)''TCONS_00016469,(K21374)''TCONS_00016469,(K21374)''TCONS_00016469,(K21374)''TCONS_00016469,(K21374)''TCONS_00016469,(K21374)''TCONS_00016469,(K21374)''TCONS_00016469,(K21374)''TCONS_00016469,(K21374)…
Metabolism	09109 Metabolism of terpenoids and polyketides	Carotenoid biosynthesis [PATH:ko00906]	41	'TCONS_00006306,(K09839)''TCONS_00028789,(K09840)''TCONS_00014524,(K15746)''TCONS_00014524,(K15746)''TCONS_00006306,(K09839)''TCONS_00006306,(K09839)''TCONS_00034974,(K17911)''TCONS_00012219,(K09835)''TCONS_00012219,(K09835)''TCONS_00012219,(K09835)''TCONS_00012219,(K09835)''TCONS_00012219,(K09835)''TCONS_00017006,(K15744)''TCONS_00017006,(K15744)''TCONS_00017006,(K15744)''TCONS_00028789,(K09840)…
Metabolism	09109 Metabolism of terpenoids and polyketides	Zeatin biosynthesis [PATH:ko00908]	26	'TCONS_00020385,(K13492)''TCONS_00023016,(K10760)''TCONS_00008823,(K00279)''TCONS_00003620,(K00791)''TCONS_00003620,(K00791)''TCONS_00003620,(K00791)''TCONS_00015640,(K13496)''TCONS_00015640,(K13496)''TCONS_00015640,(K13496)''TCONS_00015640,(K13496)''TCONS_00023016,(K10760)''TCONS_00008823,(K00279)''TCONS_00008823,(K00279)''TCONS_00008823,(K00279)''TCONS_00023016,(K10760)''TCONS_00023016,(K10760)…
Metabolism	09109 Metabolism of terpenoids and polyketides	Diterpenoid biosynthesis [PATH:ko00904]	17	'TCONS_00022630,(K12926)''TCONS_00014907,(K14039)''TCONS_00014907,(K14039)''TCONS_00028937,(K14040)''TCONS_00028937,(K14040)''TCONS_00028937,(K14040)''TCONS_00029479,(K04123)''TCONS_00029479,(K04123)''TCONS_00029479,(K04123)''TCONS_00000834,(K04125)''TCONS_00000834,(K04125)''TCONS_00000834,(K04125)''TCONS_00000834,(K04125)''TCONS_00024105,(K05282)''TCONS_00018566,(K04122)''TCONS_00024105,(K05282)…
Metabolism	09109 Metabolism of terpenoids and polyketides	Sesquiterpenoid and triterpenoid biosynthesis [PATH:ko00909]	16	'TCONS_00033523,(K15820)''TCONS_00033523,(K15820)''TCONS_00008663,(K00511)''TCONS_00009356,(K15803)''TCONS_00009356,(K15803)''TCONS_00009356,(K15803)''TCONS_00009356,(K15803)''TCONS_00009356,(K15803)''TCONS_00009356,(K15803)''TCONS_00009356,(K15803)''TCONS_00009356,(K15803)''TCONS_00009356,(K15803)''TCONS_00009356,(K15803)''TCONS_00009356,(K15803)''TCONS_00009356,(K15803)''TCONS_00009356,(K15803)'
Metabolism	09109 Metabolism of terpenoids and polyketides	Brassinosteroid biosynthesis [PATH:ko00905]	14	'TCONS_00001360,(K15639)''TCONS_00001360,(K15639)''TCONS_00001360,(K15639)''TCONS_00001360,(K15639)''TCONS_00012688,(K12638)''TCONS_00012688,(K12638)''TCONS_00017177,(K09587)''TCONS_00028399,(K12637)''TCONS_00028399,(K12637)''TCONS_00021895,(K09588)''TCONS_00021895,(K09588)''TCONS_00001360,(K15639)''TCONS_00001360,(K15639)''TCONS_00022448,(K12639)'
Metabolism	09109 Metabolism of terpenoids and polyketides	Insect hormone biosynthesis [PATH:ko00981]	9	'TCONS_00005402,(K00128)''TCONS_00005402,(K00128)''TCONS_00005402,(K00128)''TCONS_00005402,(K00128)''TCONS_00005402,(K00128)''TCONS_00005402,(K00128)''TCONS_00005402,(K00128)''TCONS_00005402,(K00128)''TCONS_00005402,(K00128)'
Metabolism	09109 Metabolism of terpenoids and polyketides	Limonene and pinene degradation [PATH:ko00903]	9	'TCONS_00005402,(K00128)''TCONS_00005402,(K00128)''TCONS_00005402,(K00128)''TCONS_00005402,(K00128)''TCONS_00005402,(K00128)''TCONS_00005402,(K00128)''TCONS_00005402,(K00128)''TCONS_00005402,(K00128)''TCONS_00005402,(K00128)'
Metabolism	09109 Metabolism of terpenoids and polyketides	Geraniol degradation [PATH:ko00281]	9	'TCONS_00015980,(K01640)''TCONS_00015980,(K01640)''TCONS_00015980,(K01640)''TCONS_00015980,(K01640)''TCONS_00015980,(K01640)''TCONS_00015980,(K01640)''TCONS_00015980,(K01640)''TCONS_00015980,(K01640)''TCONS_00015980,(K01640)'
Metabolism	09109 Metabolism of terpenoids and polyketides	Polyketide sugar unit biosynthesis [PATH:ko00523]	7	'TCONS_00024893,(K12451)''TCONS_00024893,(K12451)''TCONS_00024893,(K12451)''TCONS_00024893,(K12451)''TCONS_00029423,(K00067)''TCONS_00029423,(K00067)''TCONS_00029423,(K00067)'
Metabolism	09109 Metabolism of terpenoids and polyketides	Biosynthesis of ansamycins [PATH:ko01051]	2	'TCONS_00013930,(K00615)''TCONS_00013930,(K00615)'
Metabolism	09109 Metabolism of terpenoids and polyketides	Nonribosomal peptide structures [PATH:ko01054]	2	'TCONS_00019022,(K01779)''TCONS_00019022,(K01779)'
Metabolism	09110 Biosynthesis of other secondary metabolites	Phenylpropanoid biosynthesis [PATH:ko00940]	166	'TCONS_00018980,(K01188)''TCONS_00004265,(K09753)''TCONS_00004265,(K09753)''TCONS_00004265,(K09753)''TCONS_00004265,(K09753)''TCONS_00004265,(K09753)''TCONS_00004265,(K09753)''TCONS_00018980,(K01188)''TCONS_00018980,(K01188)''TCONS_00000780,(K00430)''TCONS_00000780,(K00430)''TCONS_00000780,(K00430)''TCONS_00000780,(K00430)''TCONS_00000780,(K00430)''TCONS_00000780,(K00430)''TCONS_00000780,(K00430)…
Metabolism	09110 Biosynthesis of other secondary metabolites	Streptomycin biosynthesis [PATH:ko00521]	29	'TCONS_00003706,(K01092)''TCONS_00003706,(K01092)''TCONS_00003706,(K01092)''TCONS_00004809,(K00844)''TCONS_00004809,(K00844)''TCONS_00004809,(K00844)''TCONS_00004809,(K00844)''TCONS_00004809,(K00844)''TCONS_00004809,(K00844)''TCONS_00004809,(K00844)''TCONS_00029423,(K00067)''TCONS_00029423,(K00067)''TCONS_00029423,(K00067)''TCONS_00004809,(K00844)''TCONS_00004809,(K00844)''TCONS_00004809,(K00844)…
Metabolism	09110 Biosynthesis of other secondary metabolites	Isoquinoline alkaloid biosynthesis [PATH:ko00950]	26	'TCONS_00032730,(K00276)''TCONS_00017018,(K13393)''TCONS_00017018,(K13393)''TCONS_00017018,(K13393)''TCONS_00032117,(K13390)''TCONS_00020942,(K13384)''TCONS_00007836,(K14975)''TCONS_00032730,(K00276)''TCONS_00032730,(K00276)''TCONS_00032730,(K00276)''TCONS_00015110,(K01592)''TCONS_00015110,(K01592)''TCONS_00015110,(K01592)''TCONS_00015110,(K01592)''TCONS_00000976,(K14455)''TCONS_00000976,(K14455)…
Metabolism	09110 Biosynthesis of other secondary metabolites	Tropane, piperidine and pyridine alkaloid biosynthesis [PATH:ko00960]	23	'TCONS_00032730,(K00276)''TCONS_00034762,(K12692)''TCONS_00032730,(K00276)''TCONS_00032730,(K00276)''TCONS_00032730,(K00276)''TCONS_00034511,(K00817)''TCONS_00034511,(K00817)''TCONS_00000976,(K14455)''TCONS_00000976,(K14455)''TCONS_00000976,(K14455)''TCONS_00000976,(K14455)''TCONS_00000976,(K14455)''TCONS_00032730,(K00276)''TCONS_00009120,(K00811)''TCONS_00009120,(K00811)''TCONS_00009120,(K00811)…
Metabolism	09110 Biosynthesis of other secondary metabolites	Flavonoid biosynthesis [PATH:ko00941]	21	'TCONS_00026801,(K21582)''TCONS_00026801,(K21582)''TCONS_00026801,(K21582)''TCONS_00026801,(K21582)''TCONS_00025163,(K00588)''TCONS_00026675,(K00475)''TCONS_00023962,(K05280)''TCONS_00023962,(K05280)''TCONS_00035120,(K13065)''TCONS_00015078,(K00660)''TCONS_00029855,(K00487)''TCONS_00029855,(K00487)''TCONS_00012408,(K09754)''TCONS_00012408,(K09754)''TCONS_00012408,(K09754)''TCONS_00012408,(K09754)…
Metabolism	09110 Biosynthesis of other secondary metabolites	Neomycin, kanamycin and gentamicin biosynthesis [PATH:ko00524]	17	'TCONS_00004809,(K00844)''TCONS_00004809,(K00844)''TCONS_00004809,(K00844)''TCONS_00004809,(K00844)''TCONS_00004809,(K00844)''TCONS_00004809,(K00844)''TCONS_00004809,(K00844)''TCONS_00004809,(K00844)''TCONS_00004809,(K00844)''TCONS_00004809,(K00844)''TCONS_00004809,(K00844)''TCONS_00004809,(K00844)''TCONS_00004809,(K00844)''TCONS_00004809,(K00844)''TCONS_00004809,(K00844)''TCONS_00004809,(K00844)…
Metabolism	09110 Biosynthesis of other secondary metabolites	Monobactam biosynthesis [PATH:ko00261]	15	'TCONS_00016334,(K13811)''TCONS_00016334,(K13811)''TCONS_00013917,(K01714)''TCONS_00024670,(K00928)''TCONS_00024670,(K00928)''TCONS_00016334,(K13811)''TCONS_00016334,(K13811)''TCONS_00016334,(K13811)''TCONS_00034341,(K00215)''TCONS_00024670,(K00928)''TCONS_00004715,(K12524)''TCONS_00013917,(K01714)''TCONS_00013917,(K01714)''TCONS_00023558,(K00133)''TCONS_00023558,(K00133)'
Metabolism	09110 Biosynthesis of other secondary metabolites	Indole alkaloid biosynthesis [PATH:ko00901]	14	'TCONS_00006529,(K12698)''TCONS_00006529,(K12698)''TCONS_00005758,(K21026)''TCONS_00005758,(K21026)''TCONS_00000732,(K12694)''TCONS_00000732,(K12694)''TCONS_00000732,(K12694)''TCONS_00000732,(K12694)''TCONS_00000732,(K12694)''TCONS_00034228,(K08233)''TCONS_00034228,(K08233)''TCONS_00034228,(K08233)''TCONS_00034228,(K08233)''TCONS_00034228,(K08233)'
Metabolism	09110 Biosynthesis of other secondary metabolites	Biosynthesis of various secondary metabolites - part 1 [PATH:ko00999]	11	'TCONS_00001797,(K20502)''TCONS_00001797,(K20502)''TCONS_00001797,(K20502)''TCONS_00001797,(K20502)''TCONS_00001797,(K20502)''TCONS_00019933,(K21354)''TCONS_00019933,(K21354)''TCONS_00019933,(K21354)''TCONS_00019933,(K21354)''TCONS_00019933,(K21354)''TCONS_00019933,(K21354)'
Metabolism	09110 Biosynthesis of other secondary metabolites	Stilbenoid, diarylheptanoid and gingerol biosynthesis [PATH:ko00945]	11	'TCONS_00025163,(K00588)''TCONS_00035120,(K13065)''TCONS_00029855,(K00487)''TCONS_00029855,(K00487)''TCONS_00012408,(K09754)''TCONS_00012408,(K09754)''TCONS_00012408,(K09754)''TCONS_00012408,(K09754)''TCONS_00012408,(K09754)''TCONS_00012408,(K09754)''TCONS_00025163,(K00588)'
Metabolism	09110 Biosynthesis of other secondary metabolites	Isoflavonoid biosynthesis [PATH:ko00943]	9	'TCONS_00013808,(K13265)''TCONS_00013808,(K13265)''TCONS_00013808,(K13265)''TCONS_00013808,(K13265)''TCONS_00007248,(K13260)''TCONS_00007248,(K13260)''TCONS_00015308,(K13261)''TCONS_00015308,(K13261)''TCONS_00015308,(K13261)'
Metabolism	09110 Biosynthesis of other secondary metabolites	Prodigiosin biosynthesis [PATH:ko00333]	9	'TCONS_00002179,(K00208)''TCONS_00002179,(K00208)''TCONS_00012637,(K00059)''TCONS_00012637,(K00059)''TCONS_00012637,(K00059)''TCONS_00012637,(K00059)''TCONS_00001759,(K00645)''TCONS_00012637,(K00059)''TCONS_00012637,(K00059)'
Metabolism	09110 Biosynthesis of other secondary metabolites	Phenazine biosynthesis [PATH:ko00405]	7	'TCONS_00021171,(K01658)''TCONS_00021171,(K01658)''TCONS_00018357,(K01657)''TCONS_00018357,(K01657)''TCONS_00018357,(K01657)''TCONS_00018357,(K01657)''TCONS_00018357,(K01657)'
Metabolism	09110 Biosynthesis of other secondary metabolites	Novobiocin biosynthesis [PATH:ko00401]	7	'TCONS_00034511,(K00817)''TCONS_00034511,(K00817)''TCONS_00030011,(K00815)''TCONS_00030011,(K00815)''TCONS_00030011,(K00815)''TCONS_00034511,(K00817)''TCONS_00034511,(K00817)'
Metabolism	09110 Biosynthesis of other secondary metabolites	Caffeine metabolism [PATH:ko00232]	6	'TCONS_00004762,(K00106)''TCONS_00004762,(K00106)''TCONS_00004762,(K00106)''TCONS_00004762,(K00106)''TCONS_00004762,(K00106)''TCONS_00004762,(K00106)'
Metabolism	09110 Biosynthesis of other secondary metabolites	Glucosinolate biosynthesis [PATH:ko00966]	5	'TCONS_00004821,(K14984)''TCONS_00016670,(K01703)''TCONS_00031346,(K00826)''TCONS_00031346,(K00826)''TCONS_00031346,(K00826)'
Metabolism	09110 Biosynthesis of other secondary metabolites	Aflatoxin biosynthesis [PATH:ko00254]	4	'TCONS_00022210,(K11262)''TCONS_00022210,(K11262)''TCONS_00022210,(K11262)''TCONS_00022210,(K11262)'
Metabolism	09110 Biosynthesis of other secondary metabolites	Biosynthesis of various secondary metabolites - part 2 [PATH:ko00998]	3	'TCONS_00009070,(K21272)''TCONS_00009070,(K21272)''TCONS_00009070,(K21272)'
Metabolism	09110 Biosynthesis of other secondary metabolites	Flavone and flavonol biosynthesis [PATH:ko00944]	2	'TCONS_00023962,(K05280)''TCONS_00023962,(K05280)'
Metabolism	09110 Biosynthesis of other secondary metabolites	Anthocyanin biosynthesis [PATH:ko00942]	1	'TCONS_00029719,(K12338)'
Metabolism	09110 Biosynthesis of other secondary metabolites	Betalain biosynthesis [PATH:ko00965]	1	'TCONS_00018264,(K15777)'
Metabolism	09111 Xenobiotics biodegradation and metabolism	Drug metabolism - other enzymes [PATH:ko00983]	88	'TCONS_00021468,(K01951)''TCONS_00034315,(K00876)''TCONS_00034315,(K00876)''TCONS_00034315,(K00876)''TCONS_00019507,(K00799)''TCONS_00002046,(K01489)''TCONS_00028071,(K10807)''TCONS_00019507,(K00799)''TCONS_00019507,(K00799)''TCONS_00019507,(K00799)''TCONS_00019507,(K00799)''TCONS_00019507,(K00799)''TCONS_00019507,(K00799)''TCONS_00003111,(K00207)''TCONS_00003111,(K00207)''TCONS_00024662,(K13421)…
Metabolism	09111 Xenobiotics biodegradation and metabolism	Drug metabolism - cytochrome P450 [PATH:ko00982]	65	'TCONS_00026736,(K00485)''TCONS_00026736,(K00485)''TCONS_00026736,(K00485)''TCONS_00026736,(K00485)''TCONS_00026736,(K00485)''TCONS_00026736,(K00485)''TCONS_00026736,(K00485)''TCONS_00026736,(K00485)''TCONS_00026736,(K00485)''TCONS_00026736,(K00485)''TCONS_00026736,(K00485)''TCONS_00006781,(K00121)''TCONS_00023815,(K00001)''TCONS_00019507,(K00799)''TCONS_00019507,(K00799)''TCONS_00019507,(K00799)…
Metabolism	09111 Xenobiotics biodegradation and metabolism	Metabolism of xenobiotics by cytochrome P450 [PATH:ko00980]	55	'TCONS_00006781,(K00121)''TCONS_00023815,(K00001)''TCONS_00019507,(K00799)''TCONS_00019507,(K00799)''TCONS_00019507,(K00799)''TCONS_00019507,(K00799)''TCONS_00019507,(K00799)''TCONS_00019507,(K00799)''TCONS_00019507,(K00799)''TCONS_00019507,(K00799)''TCONS_00019507,(K00799)''TCONS_00019507,(K00799)''TCONS_00019507,(K00799)''TCONS_00019507,(K00799)''TCONS_00019507,(K00799)''TCONS_00006781,(K00121)…
Metabolism	09111 Xenobiotics biodegradation and metabolism	Chloroalkane and chloroalkene degradation [PATH:ko00625]	22	'TCONS_00006781,(K00121)''TCONS_00005402,(K00128)''TCONS_00005402,(K00128)''TCONS_00005402,(K00128)''TCONS_00005402,(K00128)''TCONS_00005402,(K00128)''TCONS_00005402,(K00128)''TCONS_00005402,(K00128)''TCONS_00023815,(K00001)''TCONS_00005402,(K00128)''TCONS_00005402,(K00128)''TCONS_00006781,(K00121)''TCONS_00006781,(K00121)''TCONS_00006781,(K00121)''TCONS_00006781,(K00121)''TCONS_00016791,(K08726)…
Metabolism	09111 Xenobiotics biodegradation and metabolism	Styrene degradation [PATH:ko00643]	14	'TCONS_00004465,(K01426)''TCONS_00004465,(K01426)''TCONS_00004465,(K01426)''TCONS_00004465,(K01426)''TCONS_00019580,(K00451)''TCONS_00019580,(K00451)''TCONS_00019580,(K00451)''TCONS_00019580,(K00451)''TCONS_00031673,(K01555)''TCONS_00004465,(K01426)''TCONS_00004465,(K01426)''TCONS_00004465,(K01426)''TCONS_00004465,(K01426)''TCONS_00004465,(K01426)'
Metabolism	09111 Xenobiotics biodegradation and metabolism	Aminobenzoate degradation [PATH:ko00627]	12	'TCONS_00004465,(K01426)''TCONS_00004465,(K01426)''TCONS_00004465,(K01426)''TCONS_00004465,(K01426)''TCONS_00027461,(K01101)''TCONS_00027461,(K01101)''TCONS_00030975,(K01512)''TCONS_00004465,(K01426)''TCONS_00004465,(K01426)''TCONS_00004465,(K01426)''TCONS_00004465,(K01426)''TCONS_00004465,(K01426)'
Metabolism	09111 Xenobiotics biodegradation and metabolism	Benzoate degradation [PATH:ko00362]	9	'TCONS_00001137,(K00626)''TCONS_00001137,(K00626)''TCONS_00001137,(K00626)''TCONS_00001137,(K00626)''TCONS_00001137,(K00626)''TCONS_00001137,(K00626)''TCONS_00014672,(K00074)''TCONS_00014672,(K00074)''TCONS_00014672,(K00074)'
Metabolism	09111 Xenobiotics biodegradation and metabolism	Chlorocyclohexane and chlorobenzene degradation [PATH:ko00361]	7	'TCONS_00023521,(K01061)''TCONS_00023521,(K01061)''TCONS_00023521,(K01061)''TCONS_00023521,(K01061)''TCONS_00023521,(K01061)''TCONS_00023521,(K01061)''TCONS_00035155,(K01563)'
Metabolism	09111 Xenobiotics biodegradation and metabolism	Naphthalene degradation [PATH:ko00626]	6	'TCONS_00006781,(K00121)''TCONS_00023815,(K00001)''TCONS_00006781,(K00121)''TCONS_00006781,(K00121)''TCONS_00006781,(K00121)''TCONS_00006781,(K00121)'
Metabolism	09111 Xenobiotics biodegradation and metabolism	Fluorobenzoate degradation [PATH:ko00364]	6	'TCONS_00023521,(K01061)''TCONS_00023521,(K01061)''TCONS_00023521,(K01061)''TCONS_00023521,(K01061)''TCONS_00023521,(K01061)''TCONS_00023521,(K01061)'
Metabolism	09111 Xenobiotics biodegradation and metabolism	Toluene degradation [PATH:ko00623]	6	'TCONS_00023521,(K01061)''TCONS_00023521,(K01061)''TCONS_00023521,(K01061)''TCONS_00023521,(K01061)''TCONS_00023521,(K01061)''TCONS_00023521,(K01061)'
Metabolism	09111 Xenobiotics biodegradation and metabolism	Atrazine degradation [PATH:ko00791]	3	'TCONS_00022681,(K01427)''TCONS_00022681,(K01427)''TCONS_00022681,(K01427)'
Metabolism	09111 Xenobiotics biodegradation and metabolism	Steroid degradation [PATH:ko00984]	1	'TCONS_00031042,(K03333)'
Not Included in Pathway or Brite	09191 Unclassified: metabolism	Enzymes with EC numbers	488	'TCONS_00023389,(K01180)''TCONS_00023389,(K01180)''TCONS_00023389,(K01180)''TCONS_00006798,(K18195)''TCONS_00031072,(K00592)''TCONS_00031072,(K00592)''TCONS_00031072,(K00592)''TCONS_00031072,(K00592)''TCONS_00031072,(K00592)''TCONS_00013252,(K21483)''TCONS_00013252,(K21483)''TCONS_00013252,(K21483)''TCONS_00013252,(K21483)''TCONS_00013252,(K21483)''TCONS_00013252,(K21483)''TCONS_00013252,(K21483)…
Not Included in Pathway or Brite	09191 Unclassified: metabolism	Cofactor metabolism	10	'TCONS_00030537,(K18586)''TCONS_00030537,(K18586)''TCONS_00030537,(K18586)''TCONS_00030537,(K18586)''TCONS_00020808,(K18588)''TCONS_00020808,(K18588)''TCONS_00020808,(K18588)''TCONS_00020808,(K18588)''TCONS_00004646,(K18587)''TCONS_00004646,(K18587)'
Not Included in Pathway or Brite	09191 Unclassified: metabolism	Amino acid metabolism	5	'TCONS_00004610,(K08234)''TCONS_00004610,(K08234)''TCONS_00031682,(K06997)''TCONS_00031682,(K06997)''TCONS_00031682,(K06997)'
Not Included in Pathway or Brite	09191 Unclassified: metabolism	Carbohydrate metabolism	2	'TCONS_00026794,(K20628)''TCONS_00026794,(K20628)'
Not Included in Pathway or Brite	09192 Unclassified: genetic information processing	Protein processing	16	'TCONS_00026526,(K03545)''TCONS_00032598,(K07399)''TCONS_00000465,(K06891)''TCONS_00000465,(K06891)''TCONS_00000465,(K06891)''TCONS_00000465,(K06891)''TCONS_00000465,(K06891)''TCONS_00000465,(K06891)''TCONS_00000465,(K06891)''TCONS_00000465,(K06891)''TCONS_00000465,(K06891)''TCONS_00000465,(K06891)''TCONS_00000465,(K06891)''TCONS_00004040,(K03189)''TCONS_00026526,(K03545)''TCONS_00026526,(K03545)'
Not Included in Pathway or Brite	09192 Unclassified: genetic information processing	Replication and repair	12	'TCONS_00019472,(K07478)''TCONS_00019472,(K07478)''TCONS_00019472,(K07478)''TCONS_00011130,(K07497)''TCONS_00011130,(K07497)''TCONS_00011130,(K07497)''TCONS_00011130,(K07497)''TCONS_00011130,(K07497)''TCONS_00011130,(K07497)''TCONS_00011130,(K07497)''TCONS_00011130,(K07497)''TCONS_00011130,(K07497)'
Not Included in Pathway or Brite	09192 Unclassified: genetic information processing	Transcription	4	'TCONS_00007419,(K03627)''TCONS_00007419,(K03627)''TCONS_00018652,(K18667)''TCONS_00033511,(K18666)'
Not Included in Pathway or Brite	09192 Unclassified: genetic information processing	Translation	1	'TCONS_00021933,(K15025)'
Not Included in Pathway or Brite	09193 Unclassified: signaling and cellular processes	Signaling proteins	16	'TCONS_00018930,(K18810)''TCONS_00018930,(K18810)''TCONS_00018930,(K18810)''TCONS_00018930,(K18810)''TCONS_00018930,(K18810)''TCONS_00018930,(K18810)''TCONS_00010324,(K13462)''TCONS_00010324,(K13462)''TCONS_00010324,(K13462)''TCONS_00026739,(K18812)''TCONS_00028206,(K18811)''TCONS_00018930,(K18810)''TCONS_00033884,(K06207)''TCONS_00018930,(K18810)''TCONS_00028760,(K06875)''TCONS_00028760,(K06875)'
Not Included in Pathway or Brite	09193 Unclassified: signaling and cellular processes	Transport	9	'TCONS_00013666,(K03453)''TCONS_00013666,(K03453)''TCONS_00013666,(K03453)''TCONS_00013666,(K03453)''TCONS_00015001,(K03301)''TCONS_00015001,(K03301)''TCONS_00013666,(K03453)''TCONS_00012032,(K03457)''TCONS_00015001,(K03301)'
Not Included in Pathway or Brite	09193 Unclassified: signaling and cellular processes	Others	5	'TCONS_00006796,(K03926)''TCONS_00000666,(K06195)''TCONS_00000666,(K06195)''TCONS_00000666,(K06195)''TCONS_00000666,(K06195)'
Not Included in Pathway or Brite	09193 Unclassified: signaling and cellular processes	Cell growth	5	'TCONS_00012780,(K06287)''TCONS_00012780,(K06287)''TCONS_00012780,(K06287)''TCONS_00012780,(K06287)''TCONS_00012780,(K06287)'
Not Included in Pathway or Brite	09193 Unclassified: signaling and cellular processes	Structural proteins	4	'TCONS_00002212,(K02197)''TCONS_00032575,(K17928)''TCONS_00032575,(K17928)''TCONS_00013633,(K02200)'
Not Included in Pathway or Brite	09194 Poorly characterized	Function unknown	48	'TCONS_00006011,(K06890)''TCONS_00012656,(K06944)''TCONS_00012656,(K06944)''TCONS_00032025,(K07071)''TCONS_00032025,(K07071)''TCONS_00003366,(K07033)''TCONS_00003366,(K07033)''TCONS_00006011,(K06890)''TCONS_00000747,(K09131)''TCONS_00000747,(K09131)''TCONS_00000747,(K09131)''TCONS_00000747,(K09131)''TCONS_00010016,(K06962)''TCONS_00010016,(K06962)''TCONS_00021341,(K07052)''TCONS_00021341,(K07052)…
Not Included in Pathway or Brite	09194 Poorly characterized	General function prediction only	13	'TCONS_00013139,(K09015)''TCONS_00013139,(K09015)''TCONS_00027460,(K07025)''TCONS_00027460,(K07025)''TCONS_00027460,(K07025)''TCONS_00005612,(K07023)''TCONS_00026791,(K05812)''TCONS_00022642,(K13696)''TCONS_00030163,(K04750)''TCONS_00002463,(K06874)''TCONS_00002463,(K06874)''TCONS_00002463,(K06874)''TCONS_00005612,(K07023)'
Organismal Systems	09149 Aging	Longevity regulating pathway - worm [PATH:ko04212]	140	'TCONS_00029990,(K13356)''TCONS_00019017,(K01358)''TCONS_00019017,(K01358)''TCONS_00019017,(K01358)''TCONS_00019017,(K01358)''TCONS_00019017,(K01358)''TCONS_00019017,(K01358)''TCONS_00005001,(K17794)''TCONS_00005001,(K17794)''TCONS_00005001,(K17794)''TCONS_00005001,(K17794)''TCONS_00005001,(K17794)''TCONS_00005001,(K17794)''TCONS_00005001,(K17794)''TCONS_00019017,(K01358)''TCONS_00032491,(K07203)…
Organismal Systems	09149 Aging	Longevity regulating pathway [PATH:ko04211]	52	'TCONS_00032491,(K07203)''TCONS_00032491,(K07203)''TCONS_00032491,(K07203)''TCONS_00013408,(K11420)''TCONS_00023546,(K07198)''TCONS_00023546,(K07198)''TCONS_00023546,(K07198)''TCONS_00023546,(K07198)''TCONS_00023546,(K07198)''TCONS_00023546,(K07198)''TCONS_00000155,(K04688)''TCONS_00000155,(K04688)''TCONS_00000155,(K04688)''TCONS_00000155,(K04688)''TCONS_00020218,(K07204)''TCONS_00020218,(K07204)…
Organismal Systems	09149 Aging	Longevity regulating pathway - multiple species [PATH:ko04213]	51	'TCONS_00032491,(K07203)''TCONS_00032491,(K07203)''TCONS_00032491,(K07203)''TCONS_00000422,(K03695)''TCONS_00000422,(K03695)''TCONS_00000422,(K03695)''TCONS_00000422,(K03695)''TCONS_00023546,(K07198)''TCONS_00023546,(K07198)''TCONS_00023546,(K07198)''TCONS_00023546,(K07198)''TCONS_00023546,(K07198)''TCONS_00023546,(K07198)''TCONS_00000155,(K04688)''TCONS_00000155,(K04688)''TCONS_00000155,(K04688)…
Organismal Systems	09151 Immune system	Fc gamma R-mediated phagocytosis [PATH:ko04666]	102	'TCONS_00020349,(K00889)''TCONS_00020349,(K00889)''TCONS_00020349,(K00889)''TCONS_00020349,(K00889)''TCONS_00020349,(K00889)''TCONS_00032000,(K05758)''TCONS_00032000,(K05758)''TCONS_00032000,(K05758)''TCONS_00032000,(K05758)''TCONS_00032000,(K05758)''TCONS_00016210,(K01115)''TCONS_00007490,(K05756)''TCONS_00007490,(K05756)''TCONS_00007490,(K05756)''TCONS_00020349,(K00889)''TCONS_00020349,(K00889)…
Organismal Systems	09151 Immune system	NOD-like receptor signaling pathway [PATH:ko04621]	85	'TCONS_00016186,(K01363)''TCONS_00016186,(K01363)''TCONS_00029869,(K20858)''TCONS_00003399,(K03671)''TCONS_00003399,(K03671)''TCONS_00016194,(K08336)''TCONS_00029869,(K20858)''TCONS_00009315,(K08341)''TCONS_00003399,(K03671)''TCONS_00029869,(K20858)''TCONS_00029869,(K20858)''TCONS_00029869,(K20858)''TCONS_00029869,(K20858)''TCONS_00003399,(K03671)''TCONS_00012989,(K06630)''TCONS_00009315,(K08341)…
Organismal Systems	09151 Immune system	Antigen processing and presentation [PATH:ko04612]	50	'TCONS_00016186,(K01363)''TCONS_00016186,(K01363)''TCONS_00016932,(K08057)''TCONS_00016932,(K08057)''TCONS_00014869,(K09489)''TCONS_00014869,(K09489)''TCONS_00014869,(K09489)''TCONS_00031927,(K08064)''TCONS_00031927,(K08064)''TCONS_00031927,(K08064)''TCONS_00031927,(K08064)''TCONS_00014869,(K09489)''TCONS_00008647,(K01369)''TCONS_00014869,(K09489)''TCONS_00031927,(K08064)''TCONS_00031927,(K08064)…
Organismal Systems	09151 Immune system	Cytosolic DNA-sensing pathway [PATH:ko04623]	47	'TCONS_00009142,(K03007)''TCONS_00016956,(K03016)''TCONS_00016956,(K03016)''TCONS_00009142,(K03007)''TCONS_00033044,(K03013)''TCONS_00033044,(K03013)''TCONS_00033044,(K03013)''TCONS_00033044,(K03013)''TCONS_00033044,(K03013)''TCONS_00016956,(K03016)''TCONS_00016956,(K03016)''TCONS_00016956,(K03016)''TCONS_00016956,(K03016)''TCONS_00003136,(K03009)''TCONS_00003136,(K03009)''TCONS_00003136,(K03009)…
Organismal Systems	09151 Immune system	B cell receptor signaling pathway [PATH:ko04662]	35	'TCONS_00020175,(K03083)''TCONS_00013249,(K04392)''TCONS_00013249,(K04392)''TCONS_00013401,(K06268)''TCONS_00013401,(K06268)''TCONS_00013249,(K04392)''TCONS_00013249,(K04392)''TCONS_00013249,(K04392)''TCONS_00013401,(K06268)''TCONS_00020175,(K03083)''TCONS_00020175,(K03083)''TCONS_00020175,(K03083)''TCONS_00013401,(K06268)''TCONS_00013401,(K06268)''TCONS_00013401,(K06268)''TCONS_00005180,(K04368)…
Organismal Systems	09151 Immune system	IL-17 signaling pathway [PATH:ko04657]	31	'TCONS_00034900,(K12890)''TCONS_00034900,(K12890)''TCONS_00034900,(K12890)''TCONS_00034900,(K12890)''TCONS_00034900,(K12890)''TCONS_00017420,(K03352)''TCONS_00034900,(K12890)''TCONS_00034900,(K12890)''TCONS_00034900,(K12890)''TCONS_00034900,(K12890)''TCONS_00034900,(K12890)''TCONS_00034900,(K12890)''TCONS_00034900,(K12890)''TCONS_00020175,(K03083)''TCONS_00021233,(K09487)''TCONS_00021233,(K09487)…
Organismal Systems	09151 Immune system	Th17 cell differentiation [PATH:ko04659]	29	'TCONS_00032491,(K07203)''TCONS_00032491,(K07203)''TCONS_00032491,(K07203)''TCONS_00013401,(K06268)''TCONS_00013401,(K06268)''TCONS_00013401,(K06268)''TCONS_00013401,(K06268)''TCONS_00013401,(K06268)''TCONS_00013401,(K06268)''TCONS_00010866,(K04079)''TCONS_00010866,(K04079)''TCONS_00010866,(K04079)''TCONS_00010866,(K04079)''TCONS_00010866,(K04079)''TCONS_00024716,(K02580)''TCONS_00024716,(K02580)…
Organismal Systems	09151 Immune system	Natural killer cell mediated cytotoxicity [PATH:ko04650]	29	'TCONS_00013249,(K04392)''TCONS_00013249,(K04392)''TCONS_00013401,(K06268)''TCONS_00013401,(K06268)''TCONS_00013249,(K04392)''TCONS_00013249,(K04392)''TCONS_00013249,(K04392)''TCONS_00013401,(K06268)''TCONS_00013401,(K06268)''TCONS_00013401,(K06268)''TCONS_00013401,(K06268)''TCONS_00005180,(K04368)''TCONS_00005180,(K04368)''TCONS_00013249,(K04392)''TCONS_00013249,(K04392)''TCONS_00013249,(K04392)…
Organismal Systems	09151 Immune system	T cell receptor signaling pathway [PATH:ko04660]	24	'TCONS_00020175,(K03083)''TCONS_00013401,(K06268)''TCONS_00013401,(K06268)''TCONS_00013401,(K06268)''TCONS_00025586,(K06276)''TCONS_00020175,(K03083)''TCONS_00020175,(K03083)''TCONS_00020175,(K03083)''TCONS_00013401,(K06268)''TCONS_00013401,(K06268)''TCONS_00013401,(K06268)''TCONS_00005180,(K04368)''TCONS_00005180,(K04368)''TCONS_00024716,(K02580)''TCONS_00024716,(K02580)''TCONS_00013401,(K06268)…
Organismal Systems	09151 Immune system	Toll and Imd signaling pathway [PATH:ko04624]	22	'TCONS_00020239,(K06689)''TCONS_00020239,(K06689)''TCONS_00020239,(K06689)''TCONS_00024964,(K10704)''TCONS_00024964,(K10704)''TCONS_00024964,(K10704)''TCONS_00024964,(K10704)''TCONS_00024964,(K10704)''TCONS_00024964,(K10704)''TCONS_00017429,(K10580)''TCONS_00017429,(K10580)''TCONS_00024964,(K10704)''TCONS_00024964,(K10704)''TCONS_00024964,(K10704)''TCONS_00005395,(K10380)''TCONS_00005395,(K10380)…
Organismal Systems	09151 Immune system	Chemokine signaling pathway [PATH:ko04062]	21	'TCONS_00020175,(K03083)''TCONS_00013249,(K04392)''TCONS_00013249,(K04392)''TCONS_00013249,(K04392)''TCONS_00013249,(K04392)''TCONS_00013249,(K04392)''TCONS_00020175,(K03083)''TCONS_00020175,(K03083)''TCONS_00020175,(K03083)''TCONS_00005180,(K04368)''TCONS_00005180,(K04368)''TCONS_00024716,(K02580)''TCONS_00024716,(K02580)''TCONS_00034461,(K04536)''TCONS_00013249,(K04392)''TCONS_00013249,(K04392)…
Organismal Systems	09151 Immune system	C-type lectin receptor signaling pathway [PATH:ko04625]	20	'TCONS_00013401,(K06268)''TCONS_00013401,(K06268)''TCONS_00013401,(K06268)''TCONS_00013401,(K06268)''TCONS_00013401,(K06268)''TCONS_00013401,(K06268)''TCONS_00018117,(K02183)''TCONS_00024716,(K02580)''TCONS_00024716,(K02580)''TCONS_00013401,(K06268)''TCONS_00013401,(K06268)''TCONS_00013401,(K06268)''TCONS_00013401,(K06268)''TCONS_00013401,(K06268)''TCONS_00013401,(K06268)''TCONS_00013401,(K06268)…
Organismal Systems	09151 Immune system	Th1 and Th2 cell differentiation [PATH:ko04658]	17	'TCONS_00013401,(K06268)''TCONS_00013401,(K06268)''TCONS_00013401,(K06268)''TCONS_00013401,(K06268)''TCONS_00013401,(K06268)''TCONS_00013401,(K06268)''TCONS_00024716,(K02580)''TCONS_00024716,(K02580)''TCONS_00013401,(K06268)''TCONS_00013401,(K06268)''TCONS_00013401,(K06268)''TCONS_00013401,(K06268)''TCONS_00013401,(K06268)''TCONS_00013401,(K06268)''TCONS_00013401,(K06268)''TCONS_00013401,(K06268)…
Organismal Systems	09151 Immune system	Toll-like receptor signaling pathway [PATH:ko04620]	16	'TCONS_00013249,(K04392)''TCONS_00013249,(K04392)''TCONS_00013249,(K04392)''TCONS_00013249,(K04392)''TCONS_00013249,(K04392)''TCONS_00005180,(K04368)''TCONS_00005180,(K04368)''TCONS_00024716,(K02580)''TCONS_00024716,(K02580)''TCONS_00013249,(K04392)''TCONS_00013249,(K04392)''TCONS_00013249,(K04392)''TCONS_00013249,(K04392)''TCONS_00013249,(K04392)''TCONS_00013249,(K04392)''TCONS_00013249,(K04392)'
Organismal Systems	09151 Immune system	Fc epsilon RI signaling pathway [PATH:ko04664]	15	'TCONS_00013249,(K04392)''TCONS_00013249,(K04392)''TCONS_00013249,(K04392)''TCONS_00013249,(K04392)''TCONS_00013249,(K04392)''TCONS_00025586,(K06276)''TCONS_00005180,(K04368)''TCONS_00005180,(K04368)''TCONS_00013249,(K04392)''TCONS_00013249,(K04392)''TCONS_00013249,(K04392)''TCONS_00013249,(K04392)''TCONS_00013249,(K04392)''TCONS_00013249,(K04392)''TCONS_00013249,(K04392)'
Organismal Systems	09151 Immune system	Leukocyte transendothelial migration [PATH:ko04670]	12	'TCONS_00013249,(K04392)''TCONS_00013249,(K04392)''TCONS_00013249,(K04392)''TCONS_00013249,(K04392)''TCONS_00013249,(K04392)''TCONS_00013249,(K04392)''TCONS_00013249,(K04392)''TCONS_00013249,(K04392)''TCONS_00013249,(K04392)''TCONS_00013249,(K04392)''TCONS_00013249,(K04392)''TCONS_00013249,(K04392)'
Organismal Systems	09151 Immune system	RIG-I-like receptor signaling pathway [PATH:ko04622]	11	'TCONS_00016194,(K08336)''TCONS_00017814,(K11594)''TCONS_00010900,(K08339)''TCONS_00010900,(K08339)''TCONS_00010900,(K08339)''TCONS_00003651,(K12655)''TCONS_00024716,(K02580)''TCONS_00024716,(K02580)''TCONS_00016194,(K08336)''TCONS_00002905,(K00863)''TCONS_00003651,(K12655)'
Organismal Systems	09151 Immune system	Platelet activation [PATH:ko04611]	8	'TCONS_00024248,(K06269)''TCONS_00024248,(K06269)''TCONS_00024248,(K06269)''TCONS_00024248,(K06269)''TCONS_00024248,(K06269)''TCONS_00024248,(K06269)''TCONS_00024248,(K06269)''TCONS_00010233,(K07376)'
Organismal Systems	09152 Endocrine system	Glucagon signaling pathway [PATH:ko04922]	111	'TCONS_00026611,(K00161)''TCONS_00003880,(K11434)''TCONS_00003880,(K11434)''TCONS_00009441,(K04498)''TCONS_00022210,(K11262)''TCONS_00022210,(K11262)''TCONS_00022210,(K11262)''TCONS_00022210,(K11262)''TCONS_00026611,(K00161)''TCONS_00026611,(K00161)''TCONS_00026611,(K00161)''TCONS_00026611,(K00161)''TCONS_00017514,(K00850)''TCONS_00017514,(K00850)''TCONS_00001520,(K00162)''TCONS_00023546,(K07198)…
Organismal Systems	09152 Endocrine system	Insulin signaling pathway [PATH:ko04910]	96	'TCONS_00020175,(K03083)''TCONS_00022210,(K11262)''TCONS_00022210,(K11262)''TCONS_00022210,(K11262)''TCONS_00022210,(K11262)''TCONS_00032491,(K07203)''TCONS_00032491,(K07203)''TCONS_00032491,(K07203)''TCONS_00004809,(K00844)''TCONS_00004809,(K00844)''TCONS_00004809,(K00844)''TCONS_00004809,(K00844)''TCONS_00004809,(K00844)''TCONS_00024248,(K06269)''TCONS_00024248,(K06269)''TCONS_00024248,(K06269)…
Organismal Systems	09152 Endocrine system	Thyroid hormone signaling pathway [PATH:ko04919]	73	'TCONS_00030094,(K01114)''TCONS_00030094,(K01114)''TCONS_00030094,(K01114)''TCONS_00020175,(K03083)''TCONS_00009441,(K04498)''TCONS_00032491,(K07203)''TCONS_00032491,(K07203)''TCONS_00032491,(K07203)''TCONS_00004684,(K15164)''TCONS_00004684,(K15164)''TCONS_00004684,(K15164)''TCONS_00004684,(K15164)''TCONS_00004684,(K15164)''TCONS_00024732,(K11644)''TCONS_00024732,(K11644)''TCONS_00024732,(K11644)…
Organismal Systems	09152 Endocrine system	PPAR signaling pathway [PATH:ko03320]	63	'TCONS_00009294,(K00232)''TCONS_00008212,(K01897)''TCONS_00008212,(K01897)''TCONS_00008212,(K01897)''TCONS_00008212,(K01897)''TCONS_00033450,(K00864)''TCONS_00008212,(K01897)''TCONS_00008212,(K01897)''TCONS_00008212,(K01897)''TCONS_00005864,(K07513)''TCONS_00005864,(K07513)''TCONS_00005864,(K07513)''TCONS_00005864,(K07513)''TCONS_00009294,(K00232)''TCONS_00008212,(K01897)''TCONS_00008212,(K01897)…
Organismal Systems	09152 Endocrine system	Progesterone-mediated oocyte maturation [PATH:ko04914]	60	'TCONS_00017420,(K03352)''TCONS_00035201,(K06627)''TCONS_00026875,(K13728)''TCONS_00026875,(K13728)''TCONS_00026875,(K13728)''TCONS_00026875,(K13728)''TCONS_00026875,(K13728)''TCONS_00026875,(K13728)''TCONS_00035201,(K06627)''TCONS_00035201,(K06627)''TCONS_00035201,(K06627)''TCONS_00035201,(K06627)''TCONS_00007304,(K12456)''TCONS_00018315,(K03353)''TCONS_00018315,(K03353)''TCONS_00018315,(K03353)…
Organismal Systems	09152 Endocrine system	Oxytocin signaling pathway [PATH:ko04921]	51	'TCONS_00026873,(K03234)''TCONS_00026873,(K03234)''TCONS_00026873,(K03234)''TCONS_00026873,(K03234)''TCONS_00026873,(K03234)''TCONS_00026873,(K03234)''TCONS_00026873,(K03234)''TCONS_00024248,(K06269)''TCONS_00024248,(K06269)''TCONS_00024248,(K06269)''TCONS_00024248,(K06269)''TCONS_00024248,(K06269)''TCONS_00024248,(K06269)''TCONS_00023546,(K07198)''TCONS_00023546,(K07198)''TCONS_00023546,(K07198)…
Organismal Systems	09152 Endocrine system	Adipocytokine signaling pathway [PATH:ko04920]	43	'TCONS_00008212,(K01897)''TCONS_00032491,(K07203)''TCONS_00032491,(K07203)''TCONS_00032491,(K07203)''TCONS_00008212,(K01897)''TCONS_00008212,(K01897)''TCONS_00008212,(K01897)''TCONS_00008212,(K01897)''TCONS_00008212,(K01897)''TCONS_00008212,(K01897)''TCONS_00008212,(K01897)''TCONS_00008212,(K01897)''TCONS_00023546,(K07198)''TCONS_00023546,(K07198)''TCONS_00023546,(K07198)''TCONS_00023546,(K07198)…
Organismal Systems	09152 Endocrine system	GnRH signaling pathway [PATH:ko04912]	30	'TCONS_00016210,(K01115)''TCONS_00016210,(K01115)''TCONS_00016210,(K01115)''TCONS_00016210,(K01115)''TCONS_00016210,(K01115)''TCONS_00016210,(K01115)''TCONS_00016210,(K01115)''TCONS_00016210,(K01115)''TCONS_00016210,(K01115)''TCONS_00016210,(K01115)''TCONS_00016210,(K01115)''TCONS_00016210,(K01115)''TCONS_00016210,(K01115)''TCONS_00016210,(K01115)''TCONS_00016210,(K01115)''TCONS_00016210,(K01115)…
Organismal Systems	09152 Endocrine system	Parathyroid hormone synthesis, secretion and action [PATH:ko04928]	28	'TCONS_00016210,(K01115)''TCONS_00016210,(K01115)''TCONS_00016210,(K01115)''TCONS_00016210,(K01115)''TCONS_00016210,(K01115)''TCONS_00016210,(K01115)''TCONS_00016210,(K01115)''TCONS_00016210,(K01115)''TCONS_00016210,(K01115)''TCONS_00016210,(K01115)''TCONS_00016210,(K01115)''TCONS_00016210,(K01115)''TCONS_00016210,(K01115)''TCONS_00016210,(K01115)''TCONS_00016210,(K01115)''TCONS_00016210,(K01115)…
Organismal Systems	09152 Endocrine system	Renin secretion [PATH:ko04924]	21	'TCONS_00016186,(K01363)''TCONS_00016186,(K01363)''TCONS_00016186,(K01363)''TCONS_00013401,(K06268)''TCONS_00013401,(K06268)''TCONS_00013401,(K06268)''TCONS_00013401,(K06268)''TCONS_00013401,(K06268)''TCONS_00013401,(K06268)''TCONS_00018117,(K02183)''TCONS_00013401,(K06268)''TCONS_00013401,(K06268)''TCONS_00013401,(K06268)''TCONS_00013401,(K06268)''TCONS_00013401,(K06268)''TCONS_00013401,(K06268)…
Organismal Systems	09152 Endocrine system	Estrogen signaling pathway [PATH:ko04915]	21	'TCONS_00021233,(K09487)''TCONS_00021233,(K09487)''TCONS_00021233,(K09487)''TCONS_00024851,(K03283)''TCONS_00034669,(K09571)''TCONS_00024851,(K03283)''TCONS_00005180,(K04368)''TCONS_00005180,(K04368)''TCONS_00018117,(K02183)''TCONS_00010866,(K04079)''TCONS_00010866,(K04079)''TCONS_00010866,(K04079)''TCONS_00010866,(K04079)''TCONS_00010866,(K04079)''TCONS_00024851,(K03283)''TCONS_00010866,(K04079)…
Organismal Systems	09152 Endocrine system	Prolactin signaling pathway [PATH:ko04917]	16	'TCONS_00020175,(K03083)''TCONS_00020175,(K03083)''TCONS_00020175,(K03083)''TCONS_00020175,(K03083)''TCONS_00013899,(K00965)''TCONS_00013899,(K00965)''TCONS_00013899,(K00965)''TCONS_00013899,(K00965)''TCONS_00013899,(K00965)''TCONS_00013899,(K00965)''TCONS_00013899,(K00965)''TCONS_00013899,(K00965)''TCONS_00005180,(K04368)''TCONS_00005180,(K04368)''TCONS_00024716,(K02580)''TCONS_00024716,(K02580)'
Organismal Systems	09152 Endocrine system	Aldosterone synthesis and secretion [PATH:ko04925]	13	'TCONS_00018117,(K02183)''TCONS_00029175,(K13806)''TCONS_00029175,(K13806)''TCONS_00029175,(K13806)''TCONS_00029175,(K13806)''TCONS_00029175,(K13806)''TCONS_00029175,(K13806)''TCONS_00029175,(K13806)''TCONS_00029175,(K13806)''TCONS_00029175,(K13806)''TCONS_00029175,(K13806)''TCONS_00018117,(K02183)''TCONS_00018117,(K02183)'
Organismal Systems	09152 Endocrine system	Thyroid hormone synthesis [PATH:ko04918]	11	'TCONS_00023904,(K00432)''TCONS_00021233,(K09487)''TCONS_00021233,(K09487)''TCONS_00023904,(K00432)''TCONS_00023904,(K00432)''TCONS_00023904,(K00432)''TCONS_00021233,(K09487)''TCONS_00023904,(K00432)''TCONS_00003300,(K08054)''TCONS_00003300,(K08054)''TCONS_00021415,(K09490)'
Organismal Systems	09152 Endocrine system	Growth hormone synthesis, secretion and action [PATH:ko04935]	10	'TCONS_00020175,(K03083)''TCONS_00009441,(K04498)''TCONS_00032491,(K07203)''TCONS_00032491,(K07203)''TCONS_00032491,(K07203)''TCONS_00020175,(K03083)''TCONS_00020175,(K03083)''TCONS_00020175,(K03083)''TCONS_00005180,(K04368)''TCONS_00005180,(K04368)'
Organismal Systems	09152 Endocrine system	Melanogenesis [PATH:ko04916]	10	'TCONS_00020175,(K03083)''TCONS_00009441,(K04498)''TCONS_00020175,(K03083)''TCONS_00020175,(K03083)''TCONS_00020175,(K03083)''TCONS_00005180,(K04368)''TCONS_00005180,(K04368)''TCONS_00018117,(K02183)''TCONS_00018117,(K02183)''TCONS_00018117,(K02183)'
Organismal Systems	09152 Endocrine system	Relaxin signaling pathway [PATH:ko04926]	5	'TCONS_00005180,(K04368)''TCONS_00005180,(K04368)''TCONS_00024716,(K02580)''TCONS_00024716,(K02580)''TCONS_00034461,(K04536)'
Organismal Systems	09152 Endocrine system	Renin-angiotensin system [PATH:ko04614]	4	'TCONS_00005339,(K01285)''TCONS_00005339,(K01285)''TCONS_00005339,(K01285)''TCONS_00018832,(K01322)'
Organismal Systems	09152 Endocrine system	Insulin secretion [PATH:ko04911]	2	'TCONS_00025397,(K18211)''TCONS_00025397,(K18211)'
Organismal Systems	09152 Endocrine system	GnRH secretion [PATH:ko04929]	2	'TCONS_00005180,(K04368)''TCONS_00005180,(K04368)'
Organismal Systems	09152 Endocrine system	Regulation of lipolysis in adipocytes [PATH:ko04923]	2	'TCONS_00010233,(K07376)''TCONS_00010960,(K16816)'
Organismal Systems	09153 Circulatory system	Adrenergic signaling in cardiomyocytes [PATH:ko04261]	44	'TCONS_00002580,(K04354)''TCONS_00002580,(K04354)''TCONS_00002580,(K04354)''TCONS_00002580,(K04354)''TCONS_00002580,(K04354)''TCONS_00002580,(K04354)''TCONS_00002580,(K04354)''TCONS_00008065,(K11583)''TCONS_00008065,(K11583)''TCONS_00024248,(K06269)''TCONS_00024248,(K06269)''TCONS_00024248,(K06269)''TCONS_00024248,(K06269)''TCONS_00024248,(K06269)''TCONS_00024248,(K06269)''TCONS_00025440,(K03456)…
Organismal Systems	09153 Circulatory system	Cardiac muscle contraction [PATH:ko04260]	16	'TCONS_00006782,(K02267)''TCONS_00006782,(K02267)''TCONS_00014998,(K02265)''TCONS_00014998,(K02265)''TCONS_00013715,(K02266)''TCONS_00016399,(K00417)''TCONS_00016399,(K00417)''TCONS_00006782,(K02267)''TCONS_00024677,(K00411)''TCONS_00024677,(K00411)''TCONS_00024677,(K00411)''TCONS_00024677,(K00411)''TCONS_00010029,(K00413)''TCONS_00010029,(K00413)''TCONS_00010029,(K00413)''TCONS_00010029,(K00413)'
Organismal Systems	09153 Circulatory system	Vascular smooth muscle contraction [PATH:ko04270]	14	'TCONS_00004018,(K01047)''TCONS_00024248,(K06269)''TCONS_00024248,(K06269)''TCONS_00024248,(K06269)''TCONS_00024248,(K06269)''TCONS_00024248,(K06269)''TCONS_00024248,(K06269)''TCONS_00024248,(K06269)''TCONS_00005180,(K04368)''TCONS_00005180,(K04368)''TCONS_00018117,(K02183)''TCONS_00010233,(K07376)''TCONS_00018117,(K02183)''TCONS_00018117,(K02183)'
Organismal Systems	09154 Digestive system	Bile secretion [PATH:ko04976]	31	'TCONS_00007272,(K05658)''TCONS_00007272,(K05658)''TCONS_00007272,(K05658)''TCONS_00007272,(K05658)''TCONS_00007272,(K05658)''TCONS_00007272,(K05658)''TCONS_00007272,(K05658)''TCONS_00007272,(K05658)''TCONS_00007272,(K05658)''TCONS_00007272,(K05658)''TCONS_00007272,(K05658)''TCONS_00007272,(K05658)''TCONS_00007272,(K05658)''TCONS_00007272,(K05658)''TCONS_00007272,(K05658)''TCONS_00007272,(K05658)…
Organismal Systems	09154 Digestive system	Pancreatic secretion [PATH:ko04972]	30	'TCONS_00009976,(K07904)''TCONS_00018826,(K01176)''TCONS_00018826,(K01176)''TCONS_00018826,(K01176)''TCONS_00018826,(K01176)''TCONS_00018826,(K01176)''TCONS_00004018,(K01047)''TCONS_00013249,(K04392)''TCONS_00013249,(K04392)''TCONS_00021815,(K07901)''TCONS_00021815,(K07901)''TCONS_00021815,(K07901)''TCONS_00021815,(K07901)''TCONS_00021815,(K07901)''TCONS_00013249,(K04392)''TCONS_00013249,(K04392)…
Organismal Systems	09154 Digestive system	Carbohydrate digestion and absorption [PATH:ko04973]	22	'TCONS_00004809,(K00844)''TCONS_00004809,(K00844)''TCONS_00004809,(K00844)''TCONS_00004809,(K00844)''TCONS_00004809,(K00844)''TCONS_00018826,(K01176)''TCONS_00018826,(K01176)''TCONS_00018826,(K01176)''TCONS_00018826,(K01176)''TCONS_00018826,(K01176)''TCONS_00004809,(K00844)''TCONS_00004809,(K00844)''TCONS_00004809,(K00844)''TCONS_00004809,(K00844)''TCONS_00004809,(K00844)''TCONS_00004809,(K00844)…
Organismal Systems	09154 Digestive system	Mineral absorption [PATH:ko04978]	20	'TCONS_00019826,(K17686)''TCONS_00019826,(K17686)''TCONS_00019826,(K17686)''TCONS_00004198,(K14686)''TCONS_00004198,(K14686)''TCONS_00004198,(K14686)''TCONS_00023093,(K07213)''TCONS_00020214,(K14685)''TCONS_00004198,(K14686)''TCONS_00019826,(K17686)''TCONS_00019826,(K17686)''TCONS_00004198,(K14686)''TCONS_00009349,(K21398)''TCONS_00009349,(K21398)''TCONS_00024331,(K00522)''TCONS_00019826,(K17686)…
Organismal Systems	09154 Digestive system	Protein digestion and absorption [PATH:ko04974]	15	'TCONS_00029768,(K14209)''TCONS_00029768,(K14209)''TCONS_00029768,(K14209)''TCONS_00007884,(K14207)''TCONS_00007884,(K14207)''TCONS_00007884,(K14207)''TCONS_00007884,(K14207)''TCONS_00007884,(K14207)''TCONS_00007884,(K14207)''TCONS_00007884,(K14207)''TCONS_00029768,(K14209)''TCONS_00007884,(K14207)''TCONS_00005339,(K01285)''TCONS_00005339,(K01285)''TCONS_00005339,(K01285)'
Organismal Systems	09154 Digestive system	Fat digestion and absorption [PATH:ko04975]	13	'TCONS_00004018,(K01047)''TCONS_00000976,(K14455)''TCONS_00000976,(K14455)''TCONS_00000976,(K14455)''TCONS_00000976,(K14455)''TCONS_00000976,(K14455)''TCONS_00001137,(K00626)''TCONS_00001137,(K00626)''TCONS_00001137,(K00626)''TCONS_00001137,(K00626)''TCONS_00001137,(K00626)''TCONS_00001137,(K00626)''TCONS_00009454,(K14457)'
Organismal Systems	09154 Digestive system	Cholesterol metabolism [PATH:ko04979]	12	'TCONS_00003991,(K20464)''TCONS_00003991,(K20464)''TCONS_00003991,(K20464)''TCONS_00001451,(K15040)''TCONS_00001451,(K15040)''TCONS_00001451,(K15040)''TCONS_00021062,(K12385)''TCONS_00021062,(K12385)''TCONS_00001451,(K15040)''TCONS_00021062,(K12385)''TCONS_00021062,(K12385)''TCONS_00021062,(K12385)'
Organismal Systems	09154 Digestive system	Salivary secretion [PATH:ko04970]	9	'TCONS_00018826,(K01176)''TCONS_00018826,(K01176)''TCONS_00018826,(K01176)''TCONS_00018826,(K01176)''TCONS_00018826,(K01176)''TCONS_00018117,(K02183)''TCONS_00010233,(K07376)''TCONS_00018117,(K02183)''TCONS_00018117,(K02183)'
Organismal Systems	09154 Digestive system	Vitamin digestion and absorption [PATH:ko04977]	4	'TCONS_00027000,(K14611)''TCONS_00027000,(K14611)''TCONS_00027000,(K14611)''TCONS_00020191,(K14617)'
Organismal Systems	09154 Digestive system	Gastric acid secretion [PATH:ko04971]	3	'TCONS_00018117,(K02183)''TCONS_00018117,(K02183)''TCONS_00018117,(K02183)'
Organismal Systems	09155 Excretory system	Vasopressin-regulated water reabsorption [PATH:ko04962]	26	'TCONS_00009976,(K07904)''TCONS_00035237,(K10418)''TCONS_00003716,(K12462)''TCONS_00003716,(K12462)''TCONS_00003716,(K12462)''TCONS_00003716,(K12462)''TCONS_00003716,(K12462)''TCONS_00003716,(K12462)''TCONS_00003716,(K12462)''TCONS_00003716,(K12462)''TCONS_00003716,(K12462)''TCONS_00003716,(K12462)''TCONS_00001181,(K06027)''TCONS_00001181,(K06027)''TCONS_00001181,(K06027)''TCONS_00001181,(K06027)…
Organismal Systems	09155 Excretory system	Endocrine and other factor-regulated calcium reabsorption [PATH:ko04961]	18	'TCONS_00009976,(K07904)''TCONS_00023436,(K01528)''TCONS_00012840,(K11827)''TCONS_00023436,(K01528)''TCONS_00023436,(K01528)''TCONS_00023436,(K01528)''TCONS_00026135,(K04646)''TCONS_00026949,(K11824)''TCONS_00026949,(K11824)''TCONS_00026949,(K11824)''TCONS_00026949,(K11824)''TCONS_00013135,(K11826)''TCONS_00009976,(K07904)''TCONS_00009976,(K07904)''TCONS_00009976,(K07904)''TCONS_00009976,(K07904)…
Organismal Systems	09155 Excretory system	Collecting duct acid secretion [PATH:ko04966]	15	'TCONS_00022112,(K02148)''TCONS_00030262,(K02154)''TCONS_00030262,(K02154)''TCONS_00012501,(K02146)''TCONS_00012501,(K02146)''TCONS_00012501,(K02146)''TCONS_00012501,(K02146)''TCONS_00027735,(K02149)''TCONS_00027735,(K02149)''TCONS_00002192,(K02151)''TCONS_00030262,(K02154)''TCONS_00030262,(K02154)''TCONS_00002048,(K02153)''TCONS_00002048,(K02153)''TCONS_00010398,(K02155)'
Organismal Systems	09155 Excretory system	Proximal tubule bicarbonate reclamation [PATH:ko04964]	11	'TCONS_00019243,(K00261)''TCONS_00019243,(K00261)''TCONS_00019243,(K00261)''TCONS_00019243,(K00261)''TCONS_00019243,(K00261)''TCONS_00019243,(K00261)''TCONS_00019243,(K00261)''TCONS_00008071,(K00025)''TCONS_00019243,(K00261)''TCONS_00008071,(K00025)''TCONS_00008071,(K00025)'
Organismal Systems	09155 Excretory system	Aldosterone-regulated sodium reabsorption [PATH:ko04960]	1	'TCONS_00025586,(K06276)'
Organismal Systems	09156 Nervous system	Synaptic vesicle cycle [PATH:ko04721]	54	'TCONS_00029463,(K15292)''TCONS_00019856,(K08486)''TCONS_00023436,(K01528)''TCONS_00029463,(K15292)''TCONS_00029463,(K15292)''TCONS_00029463,(K15292)''TCONS_00029463,(K15292)''TCONS_00029463,(K15292)''TCONS_00022112,(K02148)''TCONS_00025397,(K18211)''TCONS_00025397,(K18211)''TCONS_00012840,(K11827)''TCONS_00023436,(K01528)''TCONS_00023436,(K01528)''TCONS_00023436,(K01528)''TCONS_00030262,(K02154)…
Organismal Systems	09156 Nervous system	Retrograde endocannabinoid signaling [PATH:ko04723]	51	'TCONS_00032809,(K03941)''TCONS_00032809,(K03941)''TCONS_00024438,(K03963)''TCONS_00024438,(K03963)''TCONS_00024438,(K03963)''TCONS_00026547,(K03953)''TCONS_00026547,(K03953)''TCONS_00008042,(K11353)''TCONS_00023128,(K15015)''TCONS_00023128,(K15015)''TCONS_00023128,(K15015)''TCONS_00007736,(K03955)''TCONS_00007736,(K03955)''TCONS_00007736,(K03955)''TCONS_00007736,(K03955)''TCONS_00007291,(K03939)…
Organismal Systems	09156 Nervous system	Glutamatergic synapse [PATH:ko04724]	51	'TCONS_00016210,(K01115)''TCONS_00016210,(K01115)''TCONS_00016210,(K01115)''TCONS_00016210,(K01115)''TCONS_00016210,(K01115)''TCONS_00016210,(K01115)''TCONS_00016210,(K01115)''TCONS_00016210,(K01115)''TCONS_00016210,(K01115)''TCONS_00016210,(K01115)''TCONS_00007884,(K14207)''TCONS_00007884,(K14207)''TCONS_00007884,(K14207)''TCONS_00007884,(K14207)''TCONS_00007884,(K14207)''TCONS_00007884,(K14207)…
Organismal Systems	09156 Nervous system	Dopaminergic synapse [PATH:ko04728]	49	'TCONS_00020175,(K03083)''TCONS_00002580,(K04354)''TCONS_00002580,(K04354)''TCONS_00002580,(K04354)''TCONS_00002580,(K04354)''TCONS_00002580,(K04354)''TCONS_00002580,(K04354)''TCONS_00002580,(K04354)''TCONS_00008065,(K11583)''TCONS_00008065,(K11583)''TCONS_00024248,(K06269)''TCONS_00024248,(K06269)''TCONS_00024248,(K06269)''TCONS_00024248,(K06269)''TCONS_00024248,(K06269)''TCONS_00024248,(K06269)…
Organismal Systems	09156 Nervous system	Neurotrophin signaling pathway [PATH:ko04722]	45	'TCONS_00020396,(K04505)''TCONS_00020175,(K03083)''TCONS_00013249,(K04392)''TCONS_00013249,(K04392)''TCONS_00020396,(K04505)''TCONS_00012989,(K06630)''TCONS_00003716,(K12462)''TCONS_00003716,(K12462)''TCONS_00003716,(K12462)''TCONS_00003716,(K12462)''TCONS_00003716,(K12462)''TCONS_00003716,(K12462)''TCONS_00003716,(K12462)''TCONS_00003716,(K12462)''TCONS_00003716,(K12462)''TCONS_00003716,(K12462)…
Organismal Systems	09156 Nervous system	GABAergic synapse [PATH:ko04727]	44	'TCONS_00009315,(K08341)''TCONS_00023658,(K01580)''TCONS_00023658,(K01580)''TCONS_00023658,(K01580)''TCONS_00023658,(K01580)''TCONS_00023658,(K01580)''TCONS_00023658,(K01580)''TCONS_00023658,(K01580)''TCONS_00023128,(K15015)''TCONS_00023128,(K15015)''TCONS_00023128,(K15015)''TCONS_00009315,(K08341)''TCONS_00007884,(K14207)''TCONS_00007884,(K14207)''TCONS_00007884,(K14207)''TCONS_00007884,(K14207)…
Organismal Systems	09156 Nervous system	Long-term potentiation [PATH:ko04720]	28	'TCONS_00009441,(K04498)''TCONS_00024248,(K06269)''TCONS_00024248,(K06269)''TCONS_00024248,(K06269)''TCONS_00024248,(K06269)''TCONS_00024248,(K06269)''TCONS_00024248,(K06269)''TCONS_00013401,(K06268)''TCONS_00013401,(K06268)''TCONS_00013401,(K06268)''TCONS_00013401,(K06268)''TCONS_00013401,(K06268)''TCONS_00013401,(K06268)''TCONS_00024248,(K06269)''TCONS_00005180,(K04368)''TCONS_00005180,(K04368)…
Organismal Systems	09156 Nervous system	Long-term depression [PATH:ko04730]	9	'TCONS_00025440,(K03456)''TCONS_00025440,(K03456)''TCONS_00019947,(K04382)''TCONS_00019947,(K04382)''TCONS_00005180,(K04368)''TCONS_00005180,(K04368)''TCONS_00010233,(K07376)''TCONS_00019947,(K04382)''TCONS_00019947,(K04382)'
Organismal Systems	09156 Nervous system	Cholinergic synapse [PATH:ko04725]	3	'TCONS_00005180,(K04368)''TCONS_00005180,(K04368)''TCONS_00034461,(K04536)'
Organismal Systems	09156 Nervous system	Serotonergic synapse [PATH:ko04726]	3	'TCONS_00005180,(K04368)''TCONS_00005180,(K04368)''TCONS_00034461,(K04536)'
Organismal Systems	09157 Sensory system	Phototransduction - fly [PATH:ko04745]	13	'TCONS_00018117,(K02183)''TCONS_00029175,(K13806)''TCONS_00029175,(K13806)''TCONS_00029175,(K13806)''TCONS_00029175,(K13806)''TCONS_00029175,(K13806)''TCONS_00029175,(K13806)''TCONS_00029175,(K13806)''TCONS_00029175,(K13806)''TCONS_00029175,(K13806)''TCONS_00029175,(K13806)''TCONS_00018117,(K02183)''TCONS_00018117,(K02183)'
Organismal Systems	09157 Sensory system	Inflammatory mediator regulation of TRP channels [PATH:ko04750]	10	'TCONS_00024248,(K06269)''TCONS_00024248,(K06269)''TCONS_00024248,(K06269)''TCONS_00024248,(K06269)''TCONS_00024248,(K06269)''TCONS_00024248,(K06269)''TCONS_00024248,(K06269)''TCONS_00018117,(K02183)''TCONS_00018117,(K02183)''TCONS_00018117,(K02183)'
Organismal Systems	09157 Sensory system	Phototransduction [PATH:ko04744]	7	'TCONS_00018117,(K02183)''TCONS_00034461,(K04536)''TCONS_00007475,(K13749)''TCONS_00007475,(K13749)''TCONS_00007475,(K13749)''TCONS_00018117,(K02183)''TCONS_00018117,(K02183)'
Organismal Systems	09157 Sensory system	Olfactory transduction [PATH:ko04740]	5	'TCONS_00018117,(K02183)''TCONS_00010233,(K07376)''TCONS_00034461,(K04536)''TCONS_00018117,(K02183)''TCONS_00018117,(K02183)'
Organismal Systems	09158 Development and regeneration	Axon regeneration [PATH:ko04361]	67	'TCONS_00020396,(K04505)''TCONS_00035698,(K11593)''TCONS_00032491,(K07203)''TCONS_00032491,(K07203)''TCONS_00032491,(K07203)''TCONS_00035698,(K11593)''TCONS_00030794,(K04459)''TCONS_00013249,(K04392)''TCONS_00013249,(K04392)''TCONS_00009950,(K00901)''TCONS_00009950,(K00901)''TCONS_00009950,(K00901)''TCONS_00009950,(K00901)''TCONS_00009950,(K00901)''TCONS_00009950,(K00901)''TCONS_00009950,(K00901)…
Organismal Systems	09158 Development and regeneration	Axon guidance [PATH:ko04360]	41	'TCONS_00020175,(K03083)''TCONS_00006164,(K05765)''TCONS_00006164,(K05765)''TCONS_00013249,(K04392)''TCONS_00013249,(K04392)''TCONS_00006164,(K05765)''TCONS_00027192,(K05766)''TCONS_00027192,(K05766)''TCONS_00027192,(K05766)''TCONS_00027192,(K05766)''TCONS_00027192,(K05766)''TCONS_00027192,(K05766)''TCONS_00013401,(K06268)''TCONS_00013401,(K06268)''TCONS_00013249,(K04392)''TCONS_00013249,(K04392)…
Organismal Systems	09158 Development and regeneration	Osteoclast differentiation [PATH:ko04380]	33	'TCONS_00022509,(K14379)''TCONS_00022509,(K14379)''TCONS_00013249,(K04392)''TCONS_00013249,(K04392)''TCONS_00013401,(K06268)''TCONS_00013401,(K06268)''TCONS_00013249,(K04392)''TCONS_00013249,(K04392)''TCONS_00013249,(K04392)''TCONS_00013401,(K06268)''TCONS_00013401,(K06268)''TCONS_00013401,(K06268)''TCONS_00013401,(K06268)''TCONS_00005180,(K04368)''TCONS_00005180,(K04368)''TCONS_00024716,(K02580)…
Organismal Systems	09158 Development and regeneration	Dorso-ventral axis formation [PATH:ko04320]	2	'TCONS_00005180,(K04368)''TCONS_00005180,(K04368)'
Organismal Systems	09159 Environmental adaptation	Plant-pathogen interaction [PATH:ko04626]	230	'TCONS_00002734,(K13447)''TCONS_00002734,(K13447)''TCONS_00009748,(K13448)''TCONS_00009748,(K13448)''TCONS_00009748,(K13448)''TCONS_00003171,(K13412)''TCONS_00003171,(K13412)''TCONS_00008789,(K15397)''TCONS_00016067,(K05391)''TCONS_00009748,(K13448)''TCONS_00009748,(K13448)''TCONS_00009748,(K13448)''TCONS_00009748,(K13448)''TCONS_00009748,(K13448)''TCONS_00009748,(K13448)''TCONS_00009748,(K13448)…
Organismal Systems	09159 Environmental adaptation	Thermogenesis [PATH:ko04714]	202	'TCONS_00019283,(K02258)''TCONS_00019283,(K02258)''TCONS_00019283,(K02258)''TCONS_00019283,(K02258)''TCONS_00019283,(K02258)''TCONS_00019283,(K02258)''TCONS_00019283,(K02258)''TCONS_00019283,(K02258)''TCONS_00019283,(K02258)''TCONS_00032809,(K03941)''TCONS_00001566,(K18159)''TCONS_00001566,(K18159)''TCONS_00001566,(K18159)''TCONS_00001566,(K18159)''TCONS_00001566,(K18159)''TCONS_00001566,(K18159)…
Organismal Systems	09159 Environmental adaptation	Circadian rhythm - plant [PATH:ko04712]	55	'TCONS_00026612,(K12133)''TCONS_00026612,(K12133)''TCONS_00026612,(K12133)''TCONS_00026612,(K12133)''TCONS_00026612,(K12133)''TCONS_00005585,(K12126)''TCONS_00026369,(K12124)''TCONS_00026369,(K12124)''TCONS_00026369,(K12124)''TCONS_00026369,(K12124)''TCONS_00026369,(K12124)''TCONS_00026369,(K12124)''TCONS_00023556,(K12116)''TCONS_00031310,(K03097)''TCONS_00031310,(K03097)''TCONS_00008651,(K12125)…
Organismal Systems	09159 Environmental adaptation	Circadian rhythm [PATH:ko04710]	27	'TCONS_00023546,(K07198)''TCONS_00023546,(K07198)''TCONS_00023546,(K07198)''TCONS_00023546,(K07198)''TCONS_00023546,(K07198)''TCONS_00023546,(K07198)''TCONS_00014298,(K03347)''TCONS_00014298,(K03347)''TCONS_00014298,(K03347)''TCONS_00014298,(K03347)''TCONS_00014298,(K03347)''TCONS_00001163,(K07199)''TCONS_00001163,(K07199)''TCONS_00001163,(K07199)''TCONS_00001163,(K07199)''TCONS_00001163,(K07199)…
Organismal Systems	09159 Environmental adaptation	Circadian entrainment [PATH:ko04713]	5	'TCONS_00018117,(K02183)''TCONS_00010233,(K07376)''TCONS_00034461,(K04536)''TCONS_00018117,(K02183)''TCONS_00018117,(K02183)'
Organismal Systems	09159 Environmental adaptation	Circadian rhythm - fly [PATH:ko04711]	4	'TCONS_00020175,(K03083)''TCONS_00020175,(K03083)''TCONS_00020175,(K03083)''TCONS_00020175,(K03083)'
Brite Hierarchies	09181 Protein families: metabolism	Protein phosphatases and associated proteins [BR:ko01009]	459	'TCONS_00004913,(K18045)''TCONS_00004913,(K18045)''TCONS_00004913,(K18045)''TCONS_00004913,(K18045)''TCONS_00004913,(K18045)''TCONS_00004913,(K18045)''TCONS_00004913,(K18045)''TCONS_00004913,(K18045)''TCONS_00004913,(K18045)''TCONS_00004913,(K18045)''TCONS_00004913,(K18045)''TCONS_00004913,(K18045)''TCONS_00007878,(K11446)''TCONS_00007878,(K11446)''TCONS_00007878,(K11446)''TCONS_00007878,(K11446)…
Brite Hierarchies	09181 Protein families: metabolism	Protein kinases [BR:ko01001]	430	'TCONS_00034883,(K06632)''TCONS_00034883,(K06632)''TCONS_00001850,(K16315)''TCONS_00020175,(K03083)''TCONS_00018268,(K14498)''TCONS_00018268,(K14498)''TCONS_00018268,(K14498)''TCONS_00018268,(K14498)''TCONS_00018268,(K14498)''TCONS_00018268,(K14498)''TCONS_00018268,(K14498)''TCONS_00018268,(K14498)''TCONS_00018268,(K14498)''TCONS_00018268,(K14498)''TCONS_00018268,(K14498)''TCONS_00018268,(K14498)…
Brite Hierarchies	09181 Protein families: metabolism	Peptidases and inhibitors [BR:ko01002]	409	'TCONS_00021468,(K01951)''TCONS_00016186,(K01363)''TCONS_00016186,(K01363)''TCONS_00019017,(K01358)''TCONS_00014033,(K11844)''TCONS_00014033,(K11844)''TCONS_00008754,(K03100)''TCONS_00008754,(K03100)''TCONS_00008754,(K03100)''TCONS_00008754,(K03100)''TCONS_00027154,(K01411)''TCONS_00027154,(K01411)''TCONS_00027154,(K01411)''TCONS_00027154,(K01411)''TCONS_00027154,(K01411)''TCONS_00027154,(K01411)…
Brite Hierarchies	09181 Protein families: metabolism	Glycosyltransferases [BR:ko01003]	403	'TCONS_00029719,(K12338)''TCONS_00016469,(K21374)''TCONS_00016469,(K21374)''TCONS_00016469,(K21374)''TCONS_00016469,(K21374)''TCONS_00016469,(K21374)''TCONS_00016469,(K21374)''TCONS_00016469,(K21374)''TCONS_00016469,(K21374)''TCONS_00016469,(K21374)''TCONS_00016469,(K21374)''TCONS_00016469,(K21374)''TCONS_00016469,(K21374)''TCONS_00016469,(K21374)''TCONS_00016469,(K21374)''TCONS_00016469,(K21374)…
Brite Hierarchies	09181 Protein families: metabolism	Amino acid related enzymes [BR:ko01007]	161	'TCONS_00000946,(K01869)''TCONS_00000946,(K01869)''TCONS_00000946,(K01869)''TCONS_00000946,(K01869)''TCONS_00013006,(K01875)''TCONS_00013006,(K01875)''TCONS_00013006,(K01875)''TCONS_00024137,(K01873)''TCONS_00024137,(K01873)''TCONS_00005721,(K01880)''TCONS_00015241,(K01872)''TCONS_00015241,(K01872)''TCONS_00021535,(K14270)''TCONS_00021535,(K14270)''TCONS_00006512,(K14272)''TCONS_00006512,(K14272)…
Brite Hierarchies	09181 Protein families: metabolism	Lipid biosynthesis proteins [BR:ko01004]	122	'TCONS_00026030,(K13508)''TCONS_00000765,(K10781)''TCONS_00000765,(K10781)''TCONS_00000765,(K10781)''TCONS_00000765,(K10781)''TCONS_00000765,(K10781)''TCONS_00013523,(K13519)''TCONS_00027336,(K03921)''TCONS_00027336,(K03921)''TCONS_00008212,(K01897)''TCONS_00008600,(K10251)''TCONS_00008600,(K10251)''TCONS_00002109,(K09458)''TCONS_00006692,(K13513)''TCONS_00006692,(K13513)''TCONS_00008212,(K01897)…
Brite Hierarchies	09181 Protein families: metabolism	Cytochrome P450 [BR:ko00199]	103	'TCONS_00020647,(K13400)''TCONS_00020647,(K13400)''TCONS_00015928,(K13407)''TCONS_00034319,(K20768)''TCONS_00004821,(K14984)''TCONS_00028937,(K14040)''TCONS_00028937,(K14040)''TCONS_00028937,(K14040)''TCONS_00007248,(K13260)''TCONS_00007248,(K13260)''TCONS_00013376,(K17875)''TCONS_00013376,(K17875)''TCONS_00013376,(K17875)''TCONS_00013376,(K17875)''TCONS_00013376,(K17875)''TCONS_00013376,(K17875)…
Brite Hierarchies	09181 Protein families: metabolism	Prenyltransferases [BR:ko01006]	50	'TCONS_00023016,(K10760)''TCONS_00032440,(K02548)''TCONS_00019529,(K05356)''TCONS_00005646,(K09833)''TCONS_00005646,(K09833)''TCONS_00003620,(K00791)''TCONS_00003620,(K00791)''TCONS_00003620,(K00791)''TCONS_00028807,(K14066)''TCONS_00028807,(K14066)''TCONS_00028807,(K14066)''TCONS_00024861,(K11713)''TCONS_00024861,(K11713)''TCONS_00024861,(K11713)''TCONS_00024861,(K11713)''TCONS_00024861,(K11713)…
Brite Hierarchies	09181 Protein families: metabolism	Photosynthesis proteins [BR:ko00194]	40	'TCONS_00030235,(K02116)''TCONS_00030235,(K02116)''TCONS_00010143,(K08901)''TCONS_00004648,(K08908)''TCONS_00005075,(K02694)''TCONS_00013560,(K08905)''TCONS_00010990,(K02639)''TCONS_00018880,(K14172)''TCONS_00018880,(K14172)''TCONS_00018880,(K14172)''TCONS_00018003,(K08915)''TCONS_00022391,(K02717)''TCONS_00013605,(K02115)''TCONS_00010143,(K08901)''TCONS_00029142,(K02113)''TCONS_00023423,(K08916)…
Brite Hierarchies	09181 Protein families: metabolism	Lipopolysaccharide biosynthesis proteins [BR:ko01005]	23	'TCONS_00021191,(K02535)''TCONS_00021191,(K02535)''TCONS_00013658,(K00979)''TCONS_00013658,(K00979)''TCONS_00001649,(K01627)''TCONS_00001649,(K01627)''TCONS_00001649,(K01627)''TCONS_00032686,(K00912)''TCONS_00032686,(K00912)''TCONS_00014857,(K06041)''TCONS_00014857,(K06041)''TCONS_00002038,(K00677)''TCONS_00002038,(K00677)''TCONS_00002038,(K00677)''TCONS_00002038,(K00677)''TCONS_00002038,(K00677)…
Brite Hierarchies	09181 Protein families: metabolism	Polyketide biosynthesis proteins [BR:ko01008]	4	'TCONS_00015078,(K00660)''TCONS_00021174,(K14672)''TCONS_00021174,(K14672)''TCONS_00021174,(K14672)'
Brite Hierarchies	09181 Protein families: metabolism	Peptidoglycan biosynthesis and degradation proteins [BR:ko01011]	3	'TCONS_00023895,(K01928)''TCONS_00003081,(K02563)''TCONS_00011799,(K01921)'
Brite Hierarchies	09182 Protein families: genetic information processing	Membrane trafficking [BR:ko04131]	1151	'TCONS_00026473,(K01551)''TCONS_00028613,(K12182)''TCONS_00028613,(K12182)''TCONS_00007154,(K20404)''TCONS_00007154,(K20404)''TCONS_00029463,(K15292)''TCONS_00019241,(K07874)''TCONS_00033179,(K13339)''TCONS_00014854,(K20069)''TCONS_00014854,(K20069)''TCONS_00014854,(K20069)''TCONS_00034687,(K12192)''TCONS_00010509,(K20359)''TCONS_00005070,(K08511)''TCONS_00005070,(K08511)''TCONS_00005070,(K08511)…
Brite Hierarchies	09182 Protein families: genetic information processing	Chromosome and associated proteins [BR:ko03036]	1007	'TCONS_00013717,(K11592)''TCONS_00013717,(K11592)''TCONS_00032931,(K11253)''TCONS_00009760,(K16812)''TCONS_00009760,(K16812)''TCONS_00009760,(K16812)''TCONS_00009760,(K16812)''TCONS_00011457,(K10683)''TCONS_00003880,(K11434)''TCONS_00003880,(K11434)''TCONS_00009872,(K03131)''TCONS_00009872,(K03131)''TCONS_00009872,(K03131)''TCONS_00009872,(K03131)''TCONS_00009872,(K03131)''TCONS_00009872,(K03131)…
Brite Hierarchies	09182 Protein families: genetic information processing	Ubiquitin system [BR:ko04121]	825	'TCONS_00021763,(K18624)''TCONS_00021763,(K18624)''TCONS_00029659,(K12180)''TCONS_00029659,(K12180)''TCONS_00029659,(K12180)''TCONS_00029659,(K12180)''TCONS_00029659,(K12180)''TCONS_00029659,(K12180)''TCONS_00029659,(K12180)''TCONS_00029659,(K12180)''TCONS_00029659,(K12180)''TCONS_00034895,(K16275)''TCONS_00034895,(K16275)''TCONS_00034895,(K16275)''TCONS_00034895,(K16275)''TCONS_00011457,(K10683)…
Brite Hierarchies	09182 Protein families: genetic information processing	Messenger RNA biogenesis [BR:ko03019]	751	'TCONS_00035063,(K12621)''TCONS_00035063,(K12621)''TCONS_00035593,(K03679)''TCONS_00035593,(K03679)''TCONS_00035593,(K03679)''TCONS_00035593,(K03679)''TCONS_00034684,(K12608)''TCONS_00034684,(K12608)''TCONS_00011457,(K10683)''TCONS_00032718,(K18422)''TCONS_00032718,(K18422)''TCONS_00032718,(K18422)''TCONS_00008310,(K12581)''TCONS_00027998,(K12611)''TCONS_00009404,(K14297)''TCONS_00009404,(K14297)…
Brite Hierarchies	09182 Protein families: genetic information processing	Spliceosome [BR:ko03041]	720	'TCONS_00030572,(K13127)''TCONS_00030572,(K13127)''TCONS_00030572,(K13127)''TCONS_00010286,(K12734)''TCONS_00034900,(K12890)''TCONS_00034900,(K12890)''TCONS_00034900,(K12890)''TCONS_00034900,(K12890)''TCONS_00034900,(K12890)''TCONS_00035063,(K12621)''TCONS_00035063,(K12621)''TCONS_00005355,(K12852)''TCONS_00000343,(K11094)''TCONS_00004242,(K12834)''TCONS_00004242,(K12834)''TCONS_00034900,(K12890)…
Brite Hierarchies	09182 Protein families: genetic information processing	Mitochondrial biogenesis [BR:ko03029]	553	'TCONS_00031467,(K17785)''TCONS_00031467,(K17785)''TCONS_00031467,(K17785)''TCONS_00031467,(K17785)''TCONS_00027320,(K02990)''TCONS_00027320,(K02990)''TCONS_00022637,(K03686)''TCONS_00019283,(K02258)''TCONS_00019283,(K02258)''TCONS_00019283,(K02258)''TCONS_00019283,(K02258)''TCONS_00019283,(K02258)''TCONS_00019283,(K02258)''TCONS_00019283,(K02258)''TCONS_00019283,(K02258)''TCONS_00019283,(K02258)…
Brite Hierarchies	09182 Protein families: genetic information processing	Ribosome biogenesis [BR:ko03009]	547	'TCONS_00016552,(K07042)''TCONS_00029884,(K06969)''TCONS_00029884,(K06969)''TCONS_00020017,(K03977)''TCONS_00032832,(K03537)''TCONS_00032832,(K03537)''TCONS_00032832,(K03537)''TCONS_00001160,(K14539)''TCONS_00001160,(K14539)''TCONS_00001160,(K14539)''TCONS_00001160,(K14539)''TCONS_00004511,(K14521)''TCONS_00004511,(K14521)''TCONS_00004511,(K14521)''TCONS_00004511,(K14521)''TCONS_00004511,(K14521)…
Brite Hierarchies	09182 Protein families: genetic information processing	DNA repair and recombination proteins [BR:ko03400]	541	'TCONS_00009197,(K02335)''TCONS_00029436,(K15338)''TCONS_00034883,(K06632)''TCONS_00034883,(K06632)''TCONS_00033134,(K10844)''TCONS_00033134,(K10844)''TCONS_00033134,(K10844)''TCONS_00033134,(K10844)''TCONS_00029818,(K20098)''TCONS_00029818,(K20098)''TCONS_00029818,(K20098)''TCONS_00029818,(K20098)''TCONS_00029818,(K20098)''TCONS_00029818,(K20098)''TCONS_00029818,(K20098)''TCONS_00029818,(K20098)…
Brite Hierarchies	09182 Protein families: genetic information processing	Transcription machinery [BR:ko03021]	500	'TCONS_00034954,(K03127)''TCONS_00033134,(K10844)''TCONS_00033134,(K10844)''TCONS_00033134,(K10844)''TCONS_00033134,(K10844)''TCONS_00009872,(K03131)''TCONS_00009872,(K03131)''TCONS_00009872,(K03131)''TCONS_00009872,(K03131)''TCONS_00009872,(K03131)''TCONS_00009872,(K03131)''TCONS_00009872,(K03131)''TCONS_00009872,(K03131)''TCONS_00024090,(K03142)''TCONS_00024090,(K03142)''TCONS_00024090,(K03142)…
Brite Hierarchies	09182 Protein families: genetic information processing	Transcription factors [BR:ko03000]	458	'TCONS_00026612,(K12133)''TCONS_00026612,(K12133)''TCONS_00026612,(K12133)''TCONS_00026612,(K12133)''TCONS_00026612,(K12133)''TCONS_00029353,(K14432)''TCONS_00029353,(K14432)''TCONS_00029353,(K14432)''TCONS_00029353,(K14432)''TCONS_00029353,(K14432)''TCONS_00029353,(K14432)''TCONS_00029353,(K14432)''TCONS_00029353,(K14432)''TCONS_00003626,(K14431)''TCONS_00003626,(K14431)''TCONS_00003626,(K14431)…
Brite Hierarchies	09182 Protein families: genetic information processing	Transfer RNA biogenesis [BR:ko03016]	408	'TCONS_00012479,(K00556)''TCONS_00012479,(K00556)''TCONS_00015604,(K03439)''TCONS_00015604,(K03439)''TCONS_00015604,(K03439)''TCONS_00015604,(K03439)''TCONS_00015604,(K03439)''TCONS_00015604,(K03439)''TCONS_00015604,(K03439)''TCONS_00024898,(K03177)''TCONS_00032832,(K03537)''TCONS_00032832,(K03537)''TCONS_00032832,(K03537)''TCONS_00000946,(K01869)''TCONS_00000946,(K01869)''TCONS_00000946,(K01869)…
Brite Hierarchies	09182 Protein families: genetic information processing	Chaperones and folding catalysts [BR:ko03110]	306	'TCONS_00022637,(K03686)''TCONS_00010286,(K12734)''TCONS_00016186,(K01363)''TCONS_00016186,(K01363)''TCONS_00027031,(K09584)''TCONS_00035560,(K12373)''TCONS_00020093,(K08956)''TCONS_00020093,(K08956)''TCONS_00020093,(K08956)''TCONS_00016932,(K08057)''TCONS_00016932,(K08057)''TCONS_00003399,(K03671)''TCONS_00003399,(K03671)''TCONS_00014869,(K09489)''TCONS_00014869,(K09489)''TCONS_00014869,(K09489)…
Brite Hierarchies	09182 Protein families: genetic information processing	Ribosome [BR:ko03011]	289	'TCONS_00027072,(K02963)''TCONS_00027320,(K02990)''TCONS_00027320,(K02990)''TCONS_00006293,(K02897)''TCONS_00005931,(K02894)''TCONS_00005931,(K02894)''TCONS_00005931,(K02894)''TCONS_00033902,(K02933)''TCONS_00018340,(K02917)''TCONS_00018340,(K02917)''TCONS_00001623,(K02957)''TCONS_00001623,(K02957)''TCONS_00015796,(K02889)''TCONS_00015796,(K02889)''TCONS_00015796,(K02889)''TCONS_00015796,(K02889)…
Brite Hierarchies	09182 Protein families: genetic information processing	Translation factors [BR:ko03012]	223	'TCONS_00020189,(K17878)''TCONS_00019166,(K03247)''TCONS_00018917,(K02519)''TCONS_00018917,(K02519)''TCONS_00003048,(K01056)''TCONS_00003048,(K01056)''TCONS_00013604,(K03113)''TCONS_00013604,(K03113)''TCONS_00026873,(K03234)''TCONS_00026873,(K03234)''TCONS_00026873,(K03234)''TCONS_00026873,(K03234)''TCONS_00026873,(K03234)''TCONS_00026873,(K03234)''TCONS_00026873,(K03234)''TCONS_00001879,(K02836)…
Brite Hierarchies	09182 Protein families: genetic information processing	DNA replication proteins [BR:ko03032]	211	'TCONS_00009197,(K02335)''TCONS_00029940,(K10747)''TCONS_00029940,(K10747)''TCONS_00029940,(K10747)''TCONS_00029940,(K10747)''TCONS_00026972,(K02324)''TCONS_00026972,(K02324)''TCONS_00014650,(K10901)''TCONS_00035201,(K06627)''TCONS_00034435,(K21777)''TCONS_00034435,(K21777)''TCONS_00018838,(K11088)''TCONS_00018838,(K11088)''TCONS_00020326,(K10755)''TCONS_00020326,(K10755)''TCONS_00005809,(K02608)…
Brite Hierarchies	09182 Protein families: genetic information processing	Proteasome [BR:ko03051]	100	'TCONS_00027522,(K02735)''TCONS_00027522,(K02735)''TCONS_00027117,(K03036)''TCONS_00027117,(K03036)''TCONS_00008821,(K03064)''TCONS_00008821,(K03064)''TCONS_00030278,(K02736)''TCONS_00017318,(K03031)''TCONS_00005050,(K02726)''TCONS_00015339,(K10839)''TCONS_00015339,(K10839)''TCONS_00015339,(K10839)''TCONS_00015339,(K10839)''TCONS_00015339,(K10839)''TCONS_00015339,(K10839)''TCONS_00015339,(K10839)…
Brite Hierarchies	09183 Protein families: signaling and cellular processes	Transporters [BR:ko02000]	693	'TCONS_00026473,(K01551)''TCONS_00002731,(K15118)''TCONS_00002731,(K15118)''TCONS_00024279,(K09872)''TCONS_00024279,(K09872)''TCONS_00035425,(K15014)''TCONS_00030711,(K16302)''TCONS_00010509,(K20359)''TCONS_00030799,(K15280)''TCONS_00030799,(K15280)''TCONS_00030799,(K15280)''TCONS_00030799,(K15280)''TCONS_00002896,(K15285)''TCONS_00001731,(K15356)''TCONS_00001731,(K15356)''TCONS_00000980,(K02575)…
Brite Hierarchies	09183 Protein families: signaling and cellular processes	Exosome [BR:ko04147]	631	'TCONS_00032873,(K00058)''TCONS_00032931,(K11253)''TCONS_00029463,(K15292)''TCONS_00019241,(K07874)''TCONS_00016186,(K01363)''TCONS_00016186,(K01363)''TCONS_00032699,(K17081)''TCONS_00034687,(K12192)''TCONS_00020604,(K00457)''TCONS_00020604,(K00457)''TCONS_00020604,(K00457)''TCONS_00001034,(K11252)''TCONS_00001034,(K11252)''TCONS_00001034,(K11252)''TCONS_00019856,(K08486)''TCONS_00005568,(K00036)…
Brite Hierarchies	09183 Protein families: signaling and cellular processes	Cytoskeleton proteins [BR:ko04812]	215	'TCONS_00021763,(K18624)''TCONS_00021763,(K18624)''TCONS_00025202,(K18584)''TCONS_00002781,(K10401)''TCONS_00027489,(K18635)''TCONS_00027489,(K18635)''TCONS_00027489,(K18635)''TCONS_00030497,(K16732)''TCONS_00032000,(K05758)''TCONS_00032000,(K05758)''TCONS_00032000,(K05758)''TCONS_00032000,(K05758)''TCONS_00032000,(K05758)''TCONS_00035237,(K10418)''TCONS_00007490,(K05756)''TCONS_00007490,(K05756)…
Brite Hierarchies	09183 Protein families: signaling and cellular processes	Ion channels [BR:ko04040]	95	'TCONS_00007232,(K05387)''TCONS_00007232,(K05387)''TCONS_00016067,(K05391)''TCONS_00007232,(K05387)''TCONS_00007232,(K05387)''TCONS_00007232,(K05387)''TCONS_00035362,(K19327)''TCONS_00035362,(K19327)''TCONS_00035362,(K19327)''TCONS_00016067,(K05391)''TCONS_00016067,(K05391)''TCONS_00016067,(K05391)''TCONS_00007232,(K05387)''TCONS_00007232,(K05387)''TCONS_00007232,(K05387)''TCONS_00007232,(K05387)…
Brite Hierarchies	09183 Protein families: signaling and cellular processes	GTP-binding proteins [BR:ko04031]	94	'TCONS_00019241,(K07874)''TCONS_00009976,(K07904)''TCONS_00006404,(K07910)''TCONS_00006404,(K07910)''TCONS_00006404,(K07910)''TCONS_00002847,(K07976)''TCONS_00013249,(K04392)''TCONS_00013249,(K04392)''TCONS_00031501,(K07943)''TCONS_00013145,(K07893)''TCONS_00013145,(K07893)''TCONS_00013145,(K07893)''TCONS_00008565,(K07937)''TCONS_00008565,(K07937)''TCONS_00019241,(K07874)''TCONS_00021815,(K07901)…
Brite Hierarchies	09183 Protein families: signaling and cellular processes	Secretion system [BR:ko02044]	76	'TCONS_00017271,(K03070)''TCONS_00008595,(K03217)''TCONS_00008595,(K03217)''TCONS_00008595,(K03217)''TCONS_00008595,(K03217)''TCONS_00020162,(K03105)''TCONS_00020162,(K03105)''TCONS_00014537,(K09540)''TCONS_00014537,(K09540)''TCONS_00014537,(K09540)''TCONS_00014537,(K09540)''TCONS_00014537,(K09540)''TCONS_00023041,(K03118)''TCONS_00003864,(K10956)''TCONS_00001779,(K03104)''TCONS_00001779,(K03104)…
Brite Hierarchies	09183 Protein families: signaling and cellular processes	CD molecules [BR:ko04090]	42	'TCONS_00007272,(K05658)''TCONS_00007272,(K05658)''TCONS_00007944,(K01510)''TCONS_00007944,(K01510)''TCONS_00007944,(K01510)''TCONS_00007272,(K05658)''TCONS_00007272,(K05658)''TCONS_00007272,(K05658)''TCONS_00007272,(K05658)''TCONS_00007272,(K05658)''TCONS_00007272,(K05658)''TCONS_00007272,(K05658)''TCONS_00007272,(K05658)''TCONS_00007272,(K05658)''TCONS_00007272,(K05658)''TCONS_00007272,(K05658)…
Brite Hierarchies	09183 Protein families: signaling and cellular processes	G protein-coupled receptors [BR:ko04030]	40	'TCONS_00013257,(K08472)''TCONS_00013257,(K08472)''TCONS_00013257,(K08472)''TCONS_00013257,(K08472)''TCONS_00013257,(K08472)''TCONS_00013257,(K08472)''TCONS_00013257,(K08472)''TCONS_00013257,(K08472)''TCONS_00013257,(K08472)''TCONS_00013257,(K08472)''TCONS_00013257,(K08472)''TCONS_00013257,(K08472)''TCONS_00013257,(K08472)''TCONS_00013257,(K08472)''TCONS_00013257,(K08472)''TCONS_00013257,(K08472)…
Brite Hierarchies	09183 Protein families: signaling and cellular processes	Lectins [BR:ko04091]	30	'TCONS_00016932,(K08057)''TCONS_00016932,(K08057)''TCONS_00002626,(K10084)''TCONS_00002626,(K10084)''TCONS_00002626,(K10084)''TCONS_00002626,(K10084)''TCONS_00002626,(K10084)''TCONS_00002626,(K10084)''TCONS_00002626,(K10084)''TCONS_00002626,(K10084)''TCONS_00002626,(K10084)''TCONS_00002626,(K10084)''TCONS_00002626,(K10084)''TCONS_00002626,(K10084)''TCONS_00002626,(K10084)''TCONS_00001299,(K10088)…
Brite Hierarchies	09183 Protein families: signaling and cellular processes	Glycosylphosphatidylinositol (GPI)-anchored proteins [BR:ko00537]	23	'TCONS_00003337,(K19891)''TCONS_00003337,(K19891)''TCONS_00003337,(K19891)''TCONS_00003337,(K19891)''TCONS_00003337,(K19891)''TCONS_00003337,(K19891)''TCONS_00003337,(K19891)''TCONS_00003337,(K19891)''TCONS_00003337,(K19891)''TCONS_00003337,(K19891)''TCONS_00003337,(K19891)''TCONS_00002282,(K19892)''TCONS_00002282,(K19892)''TCONS_00002282,(K19892)''TCONS_00002282,(K19892)''TCONS_00002282,(K19892)…
Brite Hierarchies	09183 Protein families: signaling and cellular processes	Prokaryotic defense system [BR:ko02048]	16	'TCONS_00004728,(K00558)''TCONS_00012109,(K03531)''TCONS_00012109,(K03531)''TCONS_00012109,(K03531)''TCONS_00012109,(K03531)''TCONS_00004728,(K00558)''TCONS_00004728,(K00558)''TCONS_00004386,(K01885)''TCONS_00004386,(K01885)''TCONS_00012109,(K03531)''TCONS_00004386,(K01885)''TCONS_00004386,(K01885)''TCONS_00031349,(K04487)''TCONS_00031349,(K04487)''TCONS_00004728,(K00558)''TCONS_00004728,(K00558)'
Brite Hierarchies	09183 Protein families: signaling and cellular processes	Glycosaminoglycan binding proteins [BR:ko00536]	10	'TCONS_00016186,(K01363)''TCONS_00016186,(K01363)''TCONS_00021009,(K15414)''TCONS_00021009,(K15414)''TCONS_00021009,(K15414)''TCONS_00021009,(K15414)''TCONS_00021009,(K15414)''TCONS_00021009,(K15414)''TCONS_00016186,(K01363)''TCONS_00021009,(K15414)'
Brite Hierarchies	09183 Protein families: signaling and cellular processes	Bacterial toxins [BR:ko02042]	6	'TCONS_00030094,(K01114)''TCONS_00030094,(K01114)''TCONS_00030094,(K01114)''TCONS_00030094,(K01114)''TCONS_00030094,(K01114)''TCONS_00030094,(K01114)'
Brite Hierarchies	09183 Protein families: signaling and cellular processes	Proteoglycans [BR:ko00535]	5	'TCONS_00017800,(K06669)''TCONS_00017800,(K06669)''TCONS_00017800,(K06669)''TCONS_00017800,(K06669)''TCONS_00024455,(K08134)'

## Sheet: Supplementary Materials Data S2
Geneid	transcript_id	logFC	logCPM	PValue	FDR	sprot_Top_BLASTX_hit	RNAMMER	prot_id	prot_coords	sprot_Top_BLASTP_hit	Pfam	SignalP	TmHMM	eggnog	Kegg	gene_ontology_blast	gene_ontology_pfam	transcript	peptide
XLOC_014448	TCONS_00028695	9.8506	1.61200875505325	2.88165628595948e-11	8.97380502269619e-10	.	.	Gene.55504::TCONS_00028695::g.55504::m.55504	1-378[+]	.	.	.	ExpAA=19.43^PredHel=1^Topology=i49-66o	.	.	.	.	.	.
XLOC_012126	TCONS_00023913	9.70752	3.99649112452706	4.85117037160393e-26	8.05249775536054e-24	.	.	.	.	.	.	.	.	.	.	.	.	.	.
XLOC_001914	TCONS_00003737	9.60619	1.36898529236353	2.54499327270642e-10	6.67341496856193e-09	XTH26_ARATH^XTH26_ARATH^Q:171-983,H:25-292^61.03%ID^E:7e-120^RecName: Full=Probable xyloglucan endotransglucosylase/hydrolase protein 26;^Eukaryota; Viridiplantae; Streptophyta; Embryophyta; Tracheophyta; Spermatophyta; Magnoliophyta; eudicotyledons; Gunneridae; Pentapetalae; rosids; malvids; Brassicales; Brassicaceae; Camelineae; Arabidopsis	.	Gene.4377::TCONS_00003737::g.4377::m.4377	105-986[+]	XTH26_ARATH^XTH26_ARATH^Q:23-293,H:25-292^61.03%ID^E:2e-120^RecName: Full=Probable xyloglucan endotransglucosylase/hydrolase protein 26;^Eukaryota; Viridiplantae; Streptophyta; Embryophyta; Tracheophyta; Spermatophyta; Magnoliophyta; eudicotyledons; Gunneridae; Pentapetalae; rosids; malvids; Brassicales; Brassicaceae; Camelineae; Arabidopsis	PF00722.20^Glyco_hydro_16^Glycosyl hydrolases family 16^29-207^E:2.5e-54`PF06955.11^XET_C^Xyloglucan endo-transglycosylase (XET) C-terminus^238-288^E:1.2e-15	sigP:1^25^0.599^YES	ExpAA=16.39^PredHel=1^Topology=o4-21i	COG2273^hydrolase family 16	KEGG:ath:AT4G28850`KO:K08235	GO:0048046^cellular_component^apoplast`GO:0005618^cellular_component^cell wall`GO:0004553^molecular_function^hydrolase activity, hydrolyzing O-glycosyl compounds`GO:0016762^molecular_function^xyloglucan:xyloglucosyl transferase activity`GO:0042546^biological_process^cell wall biogenesis`GO:0071555^biological_process^cell wall organization`GO:0010411^biological_process^xyloglucan metabolic process	GO:0004553^molecular_function^hydrolase activity, hydrolyzing O-glycosyl compounds`GO:0005975^biological_process^carbohydrate metabolic process`GO:0016762^molecular_function^xyloglucan:xyloglucosyl transferase activity`GO:0006073^biological_process^cellular glucan metabolic process`GO:0005618^cellular_component^cell wall`GO:0048046^cellular_component^apoplast	.	.
XLOC_016328	TCONS_00032401	9.147	4.81829282584224	7.1743156300305e-30	1.80284573186308e-27	DNJ20_ARATH^DNJ20_ARATH^Q:139-477,H:67-189^38.28%ID^E:9e-15^RecName: Full=Chaperone protein dnaJ 20, chloroplastic;^Eukaryota; Viridiplantae; Streptophyta; Embryophyta; Tracheophyta; Spermatophyta; Magnoliophyta; eudicotyledons; Gunneridae; Pentapetalae; rosids; malvids; Brassicales; Brassicaceae; Camelineae; Arabidopsis	.	Gene.57422::TCONS_00032401::g.57422::m.57422	1-498[+]	DNJ20_ARATH^DNJ20_ARATH^Q:47-159,H:67-189^38.28%ID^E:3e-15^RecName: Full=Chaperone protein dnaJ 20, chloroplastic;^Eukaryota; Viridiplantae; Streptophyta; Embryophyta; Tracheophyta; Spermatophyta; Magnoliophyta; eudicotyledons; Gunneridae; Pentapetalae; rosids; malvids; Brassicales; Brassicaceae; Camelineae; Arabidopsis	PF00226.30^DnaJ^DnaJ domain^46-113^E:2.1e-18	.	.	COG0484^ATP binding to DnaK triggers the release of the substrate protein, thus completing the reaction cycle. Several rounds of ATP-dependent interactions between DnaJ, DnaK and GrpE are required for fully efficient folding. Also involved, together with DnaK and GrpE, in the DNA replication of plasmids through activation of initiation proteins (By similarity)	KEGG:ath:AT4G13830	GO:0009507^cellular_component^chloroplast`GO:0005634^cellular_component^nucleus`GO:0061077^biological_process^chaperone-mediated protein folding`GO:1902395^biological_process^regulation of 1-deoxy-D-xylulose-5-phosphate synthase activity`GO:0010322^biological_process^regulation of isopentenyl diphosphate biosynthetic process, methylerythritol 4-phosphate pathway	.	.	.
XLOC_017132	TCONS_00033920	9.03269	0.817682381183147	8.2757896638984e-09	1.61525202145538e-07	.	.	Gene.57082::TCONS_00033920::g.57082::m.57082	3-425[+]	.	.	.	ExpAA=20.72^PredHel=1^Topology=o10-29i	.	.	.	.	.	.
XLOC_001188	TCONS_00002288	8.89484	0.680570207224751	1.25322513429529e-07	1.94631779869568e-06	.	.	.	.	.	.	.	.	.	.	.	.	.	.
XLOC_015327	TCONS_00030483	8.84117	6.20534869921235	1.33164129536462e-45	2.00778216308601e-42	BAD1_ARATH^BAD1_ARATH^Q:127-678,H:38-224^34.57%ID^E:3e-23^RecName: Full=Ankyrin repeat-containing protein BDA1 {ECO:0000305};^Eukaryota; Viridiplantae; Streptophyta; Embryophyta; Tracheophyta; Spermatophyta; Magnoliophyta; eudicotyledons; Gunneridae; Pentapetalae; rosids; malvids; Brassicales; Brassicaceae; Camelineae; Arabidopsis	.	Gene.50932::TCONS_00030483::g.50932::m.50932	1-1431[+]	BAD1_ARATH^BAD1_ARATH^Q:16-226,H:12-224^33.49%ID^E:4e-24^RecName: Full=Ankyrin repeat-containing protein BDA1 {ECO:0000305};^Eukaryota; Viridiplantae; Streptophyta; Embryophyta; Tracheophyta; Spermatophyta; Magnoliophyta; eudicotyledons; Gunneridae; Pentapetalae; rosids; malvids; Brassicales; Brassicaceae; Camelineae; Arabidopsis	PF12796.6^Ank_2^Ankyrin repeats (3 copies)^11-97^E:1.4e-09`PF13637.5^Ank_4^Ankyrin repeats (many copies)^78-127^E:1.5e-06`PF12796.6^Ank_2^Ankyrin repeats (3 copies)^106-167^E:3.1e-07`PF12796.6^Ank_2^Ankyrin repeats (3 copies)^114-214^E:3e-13`PF13637.5^Ank_4^Ankyrin repeats (many copies)^146-204^E:2.5e-09`PF00023.29^Ank^Ankyrin repeat^183-216^E:0.0012`PF13962.5^PGG^Domain of unknown function^299-4…	.	ExpAA=84.57^PredHel=3^Topology=o349-371i376-398o434-456i	COG0666^Ankyrin Repeat	KEGG:ath:AT5G54610	GO:0016021^cellular_component^integral component of membrane`GO:0005886^cellular_component^plasma membrane`GO:0045087^biological_process^innate immune response`GO:0009751^biological_process^response to salicylic acid	GO:0005515^molecular_function^protein binding	.	.
XLOC_010744	TCONS_00021213	8.65462	10.7352799046548	4.65404155556078e-52	6.14311644060862e-48	DEF2_CAPAN^DEF2_CAPAN^Q:197-340,H:9-54^63.27%ID^E:5e-12^RecName: Full=Defensin J1-2;^Eukaryota; Viridiplantae; Streptophyta; Embryophyta; Tracheophyta; Spermatophyta; Magnoliophyta; eudicotyledons; Gunneridae; Pentapetalae; asterids; lamiids; Solanales; Solanaceae; Solanoideae; Capsiceae; Capsicum	.	.	.	.	.	.	.	.	KEGG:cann:107838795	GO:0005576^cellular_component^extracellular region`GO:0050832^biological_process^defense response to fungus`GO:0031640^biological_process^killing of cells of other organism	.	.	.
XLOC_016168	TCONS_00032133	8.45999	10.2823170511026	3.70679231038334e-42	3.04849969417117e-39	EXLA1_ORYSJ^EXLA1_ORYSJ^Q:153-863,H:36-272^55.23%ID^E:4e-84^RecName: Full=Expansin-like A1;^Eukaryota; Viridiplantae; Streptophyta; Embryophyta; Tracheophyta; Spermatophyta; Magnoliophyta; Liliopsida; Poales; Poaceae; BOP clade; Oryzoideae; Oryzeae; Oryzinae; Oryza; Oryza sativa	.	Gene.56570::TCONS_00032133::g.56570::m.56570	3-896[+]	EXLA1_ORYSJ^EXLA1_ORYSJ^Q:51-287,H:36-272^54.81%ID^E:4e-85^RecName: Full=Expansin-like A1;^Eukaryota; Viridiplantae; Streptophyta; Embryophyta; Tracheophyta; Spermatophyta; Magnoliophyta; Liliopsida; Poales; Poaceae; BOP clade; Oryzoideae; Oryzeae; Oryzinae; Oryza; Oryza sativa	PF03330.17^DPBB_1^Lytic transglycolase^91-166^E:4.8e-10`PF01357.20^Pollen_allerg_1^Pollen allergen^184-262^E:1.9e-17	.	ExpAA=20.40^PredHel=1^Topology=i30-49o	ENOG410YDTV^expansin-like	KEGG:osa:4331516	GO:0005576^cellular_component^extracellular region	.	.	.
XLOC_003057	TCONS_00006050	8.45655	9.88079537723186	2.17187549428955e-47	3.5723403016528e-44	.	.	.	.	.	.	.	.	.	.	.	.	.	.
XLOC_003778	TCONS_00007447	8.41929	11.4337806096212	6.79060016648275e-52	6.14311644060862e-48	NO93_SOYBN^NO93_SOYBN^Q:364-657,H:8-105^74.49%ID^E:1e-31^RecName: Full=Early nodulin-93;^Eukaryota; Viridiplantae; Streptophyta; Embryophyta; Tracheophyta; Spermatophyta; Magnoliophyta; eudicotyledons; Gunneridae; Pentapetalae; rosids; fabids; Fabales; Fabaceae; Papilionoideae; Phaseoleae; Glycine; Soja	.	Gene.9373::TCONS_00007447::g.9373::m.9373	337-672[+]	NO93_SOYBN^NO93_SOYBN^Q:10-107,H:8-105^74.49%ID^E:1e-35^RecName: Full=Early nodulin-93;^Eukaryota; Viridiplantae; Streptophyta; Embryophyta; Tracheophyta; Spermatophyta; Magnoliophyta; eudicotyledons; Gunneridae; Pentapetalae; rosids; fabids; Fabales; Fabaceae; Papilionoideae; Phaseoleae; Glycine; Soja	PF03386.13^ENOD93^Early nodulin 93 ENOD93 protein^21-98^E:2e-39	.	ExpAA=42.35^PredHel=2^Topology=i32-54o69-86i	.	KEGG:gmx:547773	GO:0016021^cellular_component^integral component of membrane`GO:0009877^biological_process^nodulation	.	.	.
XLOC_016167	TCONS_00032127	8.38538	15.4850833516185	4.91942249480613e-45	6.84670086142518e-42	EXLA1_ORYSJ^EXLA1_ORYSJ^Q:89-826,H:36-279^44.4%ID^E:3e-70^RecName: Full=Expansin-like A1;^Eukaryota; Viridiplantae; Streptophyta; Embryophyta; Tracheophyta; Spermatophyta; Magnoliophyta; Liliopsida; Poales; Poaceae; BOP clade; Oryzoideae; Oryzeae; Oryzinae; Oryza; Oryza sativa	.	Gene.56564::TCONS_00032127::g.56564::m.56564	29-829[+]	EXLA1_ORYSJ^EXLA1_ORYSJ^Q:18-266,H:33-279^44.27%ID^E:8e-72^RecName: Full=Expansin-like A1;^Eukaryota; Viridiplantae; Streptophyta; Embryophyta; Tracheophyta; Spermatophyta; Magnoliophyta; Liliopsida; Poales; Poaceae; BOP clade; Oryzoideae; Oryzeae; Oryzinae; Oryza; Oryza sativa	PF03330.17^DPBB_1^Lytic transglycolase^61-135^E:2e-11`PF01357.20^Pollen_allerg_1^Pollen allergen^149-220^E:8.5e-17	sigP:1^17^0.939^YES	.	ENOG410YDTV^expansin-like	KEGG:osa:4331516	GO:0005576^cellular_component^extracellular region	.	.	.
XLOC_001607	TCONS_00003141	8.36776	12.3620219537288	7.42821981622579e-44	9.59991293821237e-41	MIRA_SYNDU^MIRA_SYNDU^Q:73-615,H:30-217^48.94%ID^E:7e-42^RecName: Full=Miraculin;^Eukaryota; Viridiplantae; Streptophyta; Embryophyta; Tracheophyta; Spermatophyta; Magnoliophyta; eudicotyledons; Gunneridae; Pentapetalae; asterids; Ericales; Sapotaceae; Chrysophylloideae; Synsepalum	.	Gene.2305::TCONS_00003141::g.2305::m.2305	1-618[+]	MIRA_SYNDU^MIRA_SYNDU^Q:25-205,H:30-217^49.47%ID^E:9e-53^RecName: Full=Miraculin;^Eukaryota; Viridiplantae; Streptophyta; Embryophyta; Tracheophyta; Spermatophyta; Magnoliophyta; eudicotyledons; Gunneridae; Pentapetalae; asterids; Ericales; Sapotaceae; Chrysophylloideae; Synsepalum	PF00197.17^Kunitz_legume^Trypsin and protease inhibitor^31-204^E:1.2e-51	sigP:1^24^0.805^YES	.	.	.	GO:0004866^molecular_function^endopeptidase inhibitor activity	GO:0004866^molecular_function^endopeptidase inhibitor activity	.	.
XLOC_014652	TCONS_00029090	8.35847	9.87173239093666	3.48271812163522e-51	1.57532047436865e-47	.	.	.	.	.	.	.	.	.	.	.	.	.	.
XLOC_002480	TCONS_00004852	8.31458	12.219569202554	2.89771843973396e-50	7.48977424715808e-47	EXLA1_ORYSJ^EXLA1_ORYSJ^Q:236-985,H:33-279^44.05%ID^E:3e-67^RecName: Full=Expansin-like A1;^Eukaryota; Viridiplantae; Streptophyta; Embryophyta; Tracheophyta; Spermatophyta; Magnoliophyta; Liliopsida; Poales; Poaceae; BOP clade; Oryzoideae; Oryzeae; Oryzinae; Oryza; Oryza sativa	.	Gene.8115::TCONS_00004852::g.8115::m.8115	191-988[+]	EXLA1_ORYSJ^EXLA1_ORYSJ^Q:16-265,H:33-279^44.05%ID^E:1e-68^RecName: Full=Expansin-like A1;^Eukaryota; Viridiplantae; Streptophyta; Embryophyta; Tracheophyta; Spermatophyta; Magnoliophyta; Liliopsida; Poales; Poaceae; BOP clade; Oryzoideae; Oryzeae; Oryzinae; Oryza; Oryza sativa	PF03330.17^DPBB_1^Lytic transglycolase^59-119^E:6.6e-10`PF01357.20^Pollen_allerg_1^Pollen allergen^154-223^E:1.8e-10	sigP:1^18^0.915^YES	.	ENOG410YDTV^expansin-like	KEGG:osa:4331516	GO:0005576^cellular_component^extracellular region	.	.	.
XLOC_016169	TCONS_00032136	8.30541	13.2711287201022	5.85233435592205e-50	1.32357856877122e-46	EXLA1_ARATH^EXLA1_ARATH^Q:241-993,H:16-265^50.79%ID^E:8e-75^RecName: Full=Expansin-like A1;^Eukaryota; Viridiplantae; Streptophyta; Embryophyta; Tracheophyta; Spermatophyta; Magnoliophyta; eudicotyledons; Gunneridae; Pentapetalae; rosids; malvids; Brassicales; Brassicaceae; Camelineae; Arabidopsis	.	Gene.56574::TCONS_00032136::g.56574::m.56574	202-996[+]	EXLA1_ARATH^EXLA1_ARATH^Q:2-264,H:3-265^49.81%ID^E:7e-81^RecName: Full=Expansin-like A1;^Eukaryota; Viridiplantae; Streptophyta; Embryophyta; Tracheophyta; Spermatophyta; Magnoliophyta; eudicotyledons; Gunneridae; Pentapetalae; rosids; malvids; Brassicales; Brassicaceae; Camelineae; Arabidopsis	PF03330.17^DPBB_1^Lytic transglycolase^59-134^E:2.2e-09`PF01357.20^Pollen_allerg_1^Pollen allergen^153-216^E:9.4e-15	sigP:1^18^0.938^YES	.	ENOG410YDTV^expansin-like	KEGG:ath:AT3G45970	GO:0005618^cellular_component^cell wall`GO:0005576^cellular_component^extracellular region`GO:0005794^cellular_component^Golgi apparatus`GO:0016021^cellular_component^integral component of membrane`GO:0009505^cellular_component^plant-type cell wall`GO:0009506^cellular_component^plasmodesma	.	.	.
XLOC_009995	TCONS_00019743	8.27636	8.76424794419002	2.60380419644212e-50	7.48977424715808e-47	.	.	.	.	.	.	.	.	.	.	.	.	.	.
XLOC_016865	TCONS_00033448	8.2337	7.42171439062194	3.46850994864067e-43	3.69151473533856e-40	PP285_ARATH^PP285_ARATH^Q:1043-1234,H:725-788^43.75%ID^E:6e-16^RecName: Full=Pentatricopeptide repeat-containing protein At3g57430, chloroplastic;^Eukaryota; Viridiplantae; Streptophyta; Embryophyta; Tracheophyta; Spermatophyta; Magnoliophyta; eudicotyledons; Gunneridae; Pentapetalae; rosids; malvids; Brassicales; Brassicaceae; Camelineae; Arabidopsis`PP285_ARATH^PP285_ARATH^Q:1273-1398,H:802-843…	.	.	.	.	.	.	.	ENOG410Z7Z7^Pentatricopeptide repeat-containing protein	KEGG:ath:AT3G57430	GO:0009507^cellular_component^chloroplast`GO:0004519^molecular_function^endonuclease activity`GO:0003723^molecular_function^RNA binding`GO:0008270^molecular_function^zinc ion binding`GO:0031425^biological_process^chloroplast RNA processing`GO:0006397^biological_process^mRNA processing`GO:0009451^biological_process^RNA modification	.	.	.
XLOC_017661	TCONS_00035002	8.20932	9.80740293152907	1.44540099072942e-39	8.43601294363464e-37	PER5_VITVI^PER5_VITVI^Q:13-1014,H:2-328^50.75%ID^E:3e-108^RecName: Full=Peroxidase 5 {ECO:0000250|UniProtKB:P22195};^Eukaryota; Viridiplantae; Streptophyta; Embryophyta; Tracheophyta; Spermatophyta; Magnoliophyta; eudicotyledons; Gunneridae; Pentapetalae; rosids; Vitales; Vitaceae; Vitis	.	Gene.60668::TCONS_00035002::g.60668::m.60668	1-1017[+]	PER5_VITVI^PER5_VITVI^Q:5-338,H:2-328^50.75%ID^E:3e-108^RecName: Full=Peroxidase 5 {ECO:0000250|UniProtKB:P22195};^Eukaryota; Viridiplantae; Streptophyta; Embryophyta; Tracheophyta; Spermatophyta; Magnoliophyta; eudicotyledons; Gunneridae; Pentapetalae; rosids; Vitales; Vitaceae; Vitis	PF00141.22^peroxidase^Peroxidase^49-301^E:4.7e-71	.	ExpAA=20.87^PredHel=1^Topology=i9-31o	ENOG410YDTD^peroxidase	.	GO:0005576^cellular_component^extracellular region`GO:0020037^molecular_function^heme binding`GO:0046872^molecular_function^metal ion binding`GO:0004601^molecular_function^peroxidase activity`GO:0042744^biological_process^hydrogen peroxide catabolic process`GO:0006979^biological_process^response to oxidative stress	GO:0004601^molecular_function^peroxidase activity`GO:0020037^molecular_function^heme binding`GO:0006979^biological_process^response to oxidative stress`GO:0055114^biological_process^oxidation-reduction process	.	.
XLOC_002022	TCONS_00003923	8.19471	4.96206549588757	1.92768230066625e-40	1.20267434020533e-37	.	.	.	.	.	.	.	.	.	.	.	.	.	.
XLOC_018038	TCONS_00035654	8.19429	9.4216564538075	5.97094699436825e-51	2.1606468793821e-47	ADH3_SOLTU^ADH3_SOLTU^Q:33-674,H:75-288^88.32%ID^E:2e-110^RecName: Full=Alcohol dehydrogenase 3;^Eukaryota; Viridiplantae; Streptophyta; Embryophyta; Tracheophyta; Spermatophyta; Magnoliophyta; eudicotyledons; Gunneridae; Pentapetalae; asterids; lamiids; Solanales; Solanaceae; Solanoideae; Solaneae; Solanum	.	Gene.62438::TCONS_00035654::g.62438::m.62438	3-698[+]	ADH2_SOLTU^ADH2_SOLTU^Q:11-224,H:75-288^88.32%ID^E:4e-134^RecName: Full=Alcohol dehydrogenase 2;^Eukaryota; Viridiplantae; Streptophyta; Embryophyta; Tracheophyta; Spermatophyta; Magnoliophyta; eudicotyledons; Gunneridae; Pentapetalae; asterids; lamiids; Solanales; Solanaceae; Solanoideae; Solaneae; Solanum	PF08240.11^ADH_N^Alcohol dehydrogenase GroES-like domain^11-97^E:6.9e-11`PF00107.25^ADH_zinc_N^Zinc-binding dehydrogenase^142-223^E:4.2e-18	.	.	COG1062^alcohol dehydrogenase	.	GO:0005737^cellular_component^cytoplasm`GO:0004022^molecular_function^alcohol dehydrogenase (NAD) activity`GO:0008270^molecular_function^zinc ion binding	GO:0055114^biological_process^oxidation-reduction process	.	.
XLOC_007230	TCONS_00014253	8.16585	10.6682028297114	1.45979441478692e-48	2.93467337185997e-45	ERDL8_ARATH^ERDL8_ARATH^Q:1530-1856,H:359-467^64.22%ID^E:5e-121^RecName: Full=Sugar transporter ERD6-like 8;^Eukaryota; Viridiplantae; Streptophyta; Embryophyta; Tracheophyta; Spermatophyta; Magnoliophyta; eudicotyledons; Gunneridae; Pentapetalae; rosids; malvids; Brassicales; Brassicaceae; Camelineae; Arabidopsis`ERDL8_ARATH^ERDL8_ARATH^Q:741-1265,H:167-341^50%ID^E:5e-121^RecName: Full=Sugar tra…	.	Gene.20496::TCONS_00014253::g.20496::m.20496	756-1328[+]	EDL16_ARATH^EDL16_ARATH^Q:1-168,H:181-348^61.9%ID^E:1e-67^RecName: Full=Sugar transporter ERD6-like 16;^Eukaryota; Viridiplantae; Streptophyta; Embryophyta; Tracheophyta; Spermatophyta; Magnoliophyta; eudicotyledons; Gunneridae; Pentapetalae; rosids; malvids; Brassicales; Brassicaceae; Camelineae; Arabidopsis	PF00083.23^Sugar_tr^Sugar (and other) transporter^10-179^E:1.7e-29	.	ExpAA=83.89^PredHel=4^Topology=o15-37i100-122o137-156i163-182o	ENOG410XNQK^Transporter	KEGG:ath:AT5G18840	GO:0016021^cellular_component^integral component of membrane`GO:0005355^molecular_function^glucose transmembrane transporter activity`GO:0005351^molecular_function^sugar:proton symporter activity`GO:0046323^biological_process^glucose import`GO:0035428^biological_process^hexose transmembrane transport	GO:0022857^molecular_function^transmembrane transporter activity`GO:0055085^biological_process^transmembrane transport`GO:0016021^cellular_component^integral component of membrane	.	.
XLOC_015791	TCONS_00031429	8.11347	2.40832752586648	1.09507626594765e-12	4.30722062604147e-11	.	.	.	.	.	.	.	.	.	.	.	.	.	.
XLOC_017457	TCONS_00034579	8.10439	5.76271766838179	2.76055082496857e-42	2.37841171791221e-39	ADH_MALDO^ADH_MALDO^Q:4-225,H:1-74^87.84%ID^E:2e-42^RecName: Full=Alcohol dehydrogenase;^Eukaryota; Viridiplantae; Streptophyta; Embryophyta; Tracheophyta; Spermatophyta; Magnoliophyta; eudicotyledons; Gunneridae; Pentapetalae; rosids; fabids; Rosales; Rosaceae; Maloideae; Maleae; Malus	.	.	.	.	.	.	.	.	KEGG:mdm:103428551`KO:K18857	GO:0005737^cellular_component^cytoplasm`GO:0004022^molecular_function^alcohol dehydrogenase (NAD) activity`GO:0008270^molecular_function^zinc ion binding	.	.	.
XLOC_000411	TCONS_00000799	8.10165	7.26823397815072	1.63489477316141e-32	4.93002518846823e-30	STGL1_ARATH^STGL1_ARATH^Q:142-387,H:67-152^47.67%ID^E:2e-21^RecName: Full=Stigma-specific STIG1-like protein 1 {ECO:0000303|PubMed:19279211};^Eukaryota; Viridiplantae; Streptophyta; Embryophyta; Tracheophyta; Spermatophyta; Magnoliophyta; eudicotyledons; Gunneridae; Pentapetalae; rosids; malvids; Brassicales; Brassicaceae; Camelineae; Arabidopsis	.	Gene.3045::TCONS_00000799::g.3045::m.3045	1-390[+]	STGL1_ARATH^STGL1_ARATH^Q:48-129,H:67-152^47.67%ID^E:2e-21^RecName: Full=Stigma-specific STIG1-like protein 1 {ECO:0000303|PubMed:19279211};^Eukaryota; Viridiplantae; Streptophyta; Embryophyta; Tracheophyta; Spermatophyta; Magnoliophyta; eudicotyledons; Gunneridae; Pentapetalae; rosids; malvids; Brassicales; Brassicaceae; Camelineae; Arabidopsis	PF04885.12^Stig1^Stigma-specific protein, Stig1^20-129^E:1.4e-38	.	.	ENOG4111VQ8^Stigma-specific protein, Stig1	KEGG:ath:AT4G26880	.	.	.	.
XLOC_015627	TCONS_00031116	8.09799	10.7565522489873	1.84448099697639e-41	1.45096498601277e-38	CSD_STAAN^CSD_STAAN^Q:238-966,H:18-240^27.09%ID^E:2e-14^RecName: Full=Probable cysteine desulfurase;^Bacteria; Firmicutes; Bacilli; Bacillales; Staphylococcaceae; Staphylococcus	.	Gene.53032::TCONS_00031116::g.53032::m.53032	1-1125[+]	CSD_STAAN^CSD_STAAN^Q:80-349,H:18-265^26.62%ID^E:2e-17^RecName: Full=Probable cysteine desulfurase;^Bacteria; Firmicutes; Bacilli; Bacillales; Staphylococcaceae; Staphylococcus	PF00266.18^Aminotran_5^Aminotransferase class-V^115-347^E:8.1e-22	.	.	.	KEGG:sau:SA0776`KO:K11717	GO:0031071^molecular_function^cysteine desulfurase activity`GO:0030170^molecular_function^pyridoxal phosphate binding`GO:0006534^biological_process^cysteine metabolic process	.	.	.
XLOC_015642	TCONS_00031142	8.03514	6.68637135650813	2.06620542106618e-40	1.24612848944501e-37	WTR45_ARATH^WTR45_ARATH^Q:57-1133,H:1-356^43.68%ID^E:2e-85^RecName: Full=WAT1-related protein At5g64700;^Eukaryota; Viridiplantae; Streptophyta; Embryophyta; Tracheophyta; Spermatophyta; Magnoliophyta; eudicotyledons; Gunneridae; Pentapetalae; rosids; malvids; Brassicales; Brassicaceae; Camelineae; Arabidopsis	.	Gene.53115::TCONS_00031142::g.53115::m.53115	63-1151[+]	WTR45_ARATH^WTR45_ARATH^Q:1-357,H:3-356^43.92%ID^E:9e-91^RecName: Full=WAT1-related protein At5g64700;^Eukaryota; Viridiplantae; Streptophyta; Embryophyta; Tracheophyta; Spermatophyta; Magnoliophyta; eudicotyledons; Gunneridae; Pentapetalae; rosids; malvids; Brassicales; Brassicaceae; Camelineae; Arabidopsis	PF00892.19^EamA^EamA-like transporter family^5-131^E:8.8e-13`PF00892.19^EamA^EamA-like transporter family^182-320^E:2.5e-12	.	ExpAA=213.58^PredHel=10^Topology=i7-29o34-56i69-91o95-117i130-149o179-201i214-233o243-262i274-296o300-322i	ENOG410Y944^EamA-like transporter family	KEGG:ath:AT5G64700	GO:0016021^cellular_component^integral component of membrane`GO:0005886^cellular_component^plasma membrane`GO:0022857^molecular_function^transmembrane transporter activity`GO:0006810^biological_process^transport	GO:0016020^cellular_component^membrane`GO:0016021^cellular_component^integral component of membrane	.	.
XLOC_017458	TCONS_00034580	8.02828	12.4935257367203	3.36352965361299e-51	1.57532047436865e-47	ADH1_PETHY^ADH1_PETHY^Q:79-1212,H:4-382^86.54%ID^E:0^RecName: Full=Alcohol dehydrogenase 1 {ECO:0000303|PubMed:1678286};^Eukaryota; Viridiplantae; Streptophyta; Embryophyta; Tracheophyta; Spermatophyta; Magnoliophyta; eudicotyledons; Gunneridae; Pentapetalae; asterids; lamiids; Solanales; Solanaceae; Petunioideae; Petunia	.	Gene.59231::TCONS_00034580::g.59231::m.59231	76-1215[+]	ADH1_ARATH^ADH1_ARATH^Q:1-377,H:1-377^86.21%ID^E:0^RecName: Full=Alcohol dehydrogenase class-P {ECO:0000305};^Eukaryota; Viridiplantae; Streptophyta; Embryophyta; Tracheophyta; Spermatophyta; Magnoliophyta; eudicotyledons; Gunneridae; Pentapetalae; rosids; malvids; Brassicales; Brassicaceae; Camelineae; Arabidopsis	PF08240.11^ADH_N^Alcohol dehydrogenase GroES-like domain^35-160^E:1.4e-23`PF00107.25^ADH_zinc_N^Zinc-binding dehydrogenase^205-329^E:8.4e-25	.	.	COG1062^alcohol dehydrogenase	KEGG:ath:AT1G77120`KO:K18857	GO:0005829^cellular_component^cytosol`GO:0005886^cellular_component^plasma membrane`GO:0004022^molecular_function^alcohol dehydrogenase (NAD) activity`GO:0000166^molecular_function^nucleotide binding`GO:0042803^molecular_function^protein homodimerization activity`GO:0008270^molecular_function^zinc ion binding`GO:1900039^biological_process^positive regulation of cellular response to hypoxia`GO:000…	GO:0055114^biological_process^oxidation-reduction process	.	.
XLOC_002714	TCONS_00005381	7.95312	8.009921636031	3.1732533808869e-37	1.55172090325369e-34	P4H3_ARATH^P4H3_ARATH^Q:2-808,H:12-284^70.8%ID^E:4e-137^RecName: Full=Probable prolyl 4-hydroxylase 3 {ECO:0000305};^Eukaryota; Viridiplantae; Streptophyta; Embryophyta; Tracheophyta; Spermatophyta; Magnoliophyta; eudicotyledons; Gunneridae; Pentapetalae; rosids; malvids; Brassicales; Brassicaceae; Camelineae; Arabidopsis	.	Gene.9721::TCONS_00005381::g.9721::m.9721	2-817[+]	P4H3_ARATH^P4H3_ARATH^Q:1-269,H:12-284^70.8%ID^E:2e-138^RecName: Full=Probable prolyl 4-hydroxylase 3 {ECO:0000305};^Eukaryota; Viridiplantae; Streptophyta; Embryophyta; Tracheophyta; Spermatophyta; Magnoliophyta; eudicotyledons; Gunneridae; Pentapetalae; rosids; malvids; Brassicales; Brassicaceae; Camelineae; Arabidopsis	PF03171.19^2OG-FeII_Oxy^2OG-Fe(II) oxygenase superfamily^147-266^E:6.7e-12`PF13640.5^2OG-FeII_Oxy_3^2OG-Fe(II) oxygenase superfamily^148-266^E:1e-20	.	ExpAA=19.59^PredHel=1^Topology=i12-31o	ENOG410XS5J^prolyl 4-hydroxylase	KEGG:ath:AT1G20270`KO:K00472	GO:0005789^cellular_component^endoplasmic reticulum membrane`GO:0005768^cellular_component^endosome`GO:0005794^cellular_component^Golgi apparatus`GO:0016021^cellular_component^integral component of membrane`GO:0005802^cellular_component^trans-Golgi network`GO:0005506^molecular_function^iron ion binding`GO:0031418^molecular_function^L-ascorbic acid binding`GO:0004656^molecular_function^procollagen…	GO:0016491^molecular_function^oxidoreductase activity`GO:0055114^biological_process^oxidation-reduction process	.	.
XLOC_016228	TCONS_00032246	7.9108	6.97952882472233	2.54722882810326e-35	9.03666886017105e-33	.	.	Gene.56904::TCONS_00032246::g.56904::m.56904	56-472[+]	.	PF13499.5^EF-hand_7^EF-hand domain pair^25-96^E:8.9e-09`PF13833.5^EF-hand_8^EF-hand domain pair^76-96^E:0.0062`PF13202.5^EF-hand_5^EF hand^77-95^E:0.016	.	.	.	.	.	GO:0005509^molecular_function^calcium ion binding	.	.
XLOC_011933	TCONS_00023568	7.86292	10.3858766249228	1.09533547305132e-40	7.33996470885833e-38	PCR2_ARATH^PCR2_ARATH^Q:81-491,H:13-152^47.14%ID^E:2e-40^RecName: Full=Protein PLANT CADMIUM RESISTANCE 2;^Eukaryota; Viridiplantae; Streptophyta; Embryophyta; Tracheophyta; Spermatophyta; Magnoliophyta; eudicotyledons; Gunneridae; Pentapetalae; rosids; malvids; Brassicales; Brassicaceae; Camelineae; Arabidopsis	.	.	.	.	.	.	.	ENOG410XUTP^Protein PLANT CADMIUM RESISTANCE	KEGG:ath:AT1G14870	GO:0016021^cellular_component^integral component of membrane`GO:0005886^cellular_component^plasma membrane`GO:0006979^biological_process^response to oxidative stress	.	.	.
XLOC_005325	TCONS_00010495	7.83328	6.282034681386	1.53005706424121e-28	3.07592471814625e-26	.	.	.	.	.	.	.	.	.	.	.	.	.	.
XLOC_008130	TCONS_00015960	7.74037	9.93046132951307	2.91744949376266e-43	3.29908835566549e-40	.	.	Gene.26737::TCONS_00015960::g.26737::m.26737	2-403[+]	.	.	.	.	.	.	.	.	.	.
XLOC_007354	TCONS_00014501	7.613	-0.507292300484377	7.59255319791283e-06	7.3413661094507e-05	REMO_SOLTU^REMO_SOLTU^Q:105-419,H:93-197^50.48%ID^E:2e-20^RecName: Full=Remorin;^Eukaryota; Viridiplantae; Streptophyta; Embryophyta; Tracheophyta; Spermatophyta; Magnoliophyta; eudicotyledons; Gunneridae; Pentapetalae; asterids; lamiids; Solanales; Solanaceae; Solanoideae; Solaneae; Solanum	.	Gene.21390::TCONS_00014501::g.21390::m.21390	54-431[+]	REMO_SOLTU^REMO_SOLTU^Q:18-123,H:93-198^50%ID^E:6e-21^RecName: Full=Remorin;^Eukaryota; Viridiplantae; Streptophyta; Embryophyta; Tracheophyta; Spermatophyta; Magnoliophyta; eudicotyledons; Gunneridae; Pentapetalae; asterids; lamiids; Solanales; Solanaceae; Solanoideae; Solaneae; Solanum	PF03763.12^Remorin_C^Remorin, C-terminal region^13-118^E:8.8e-17	.	.	ENOG410YI71^Remorin family	KEGG:sot:102577743	GO:0005886^cellular_component^plasma membrane`GO:0048032^molecular_function^galacturonate binding`GO:0007267^biological_process^cell-cell signaling`GO:0006810^biological_process^transport	.	.	.
XLOC_010827	TCONS_00021370	7.56003	8.11521738031948	7.48460067343311e-37	3.38547199961063e-34	.	.	.	.	.	.	.	.	.	.	.	.	.	.
XLOC_002386	TCONS_00004656	7.54433	13.3156764694609	1.87164465136314e-43	2.25757777847422e-40	SUSY_SOYBN^SUSY_SOYBN^Q:139-2484,H:1-805^84.84%ID^E:0^RecName: Full=Sucrose synthase;^Eukaryota; Viridiplantae; Streptophyta; Embryophyta; Tracheophyta; Spermatophyta; Magnoliophyta; eudicotyledons; Gunneridae; Pentapetalae; rosids; fabids; Fabales; Fabaceae; Papilionoideae; Phaseoleae; Glycine; Soja	.	Gene.7468::TCONS_00004656::g.7468::m.7468	139-2490[+]	SUSY_SOYBN^SUSY_SOYBN^Q:1-782,H:1-805^84.84%ID^E:0^RecName: Full=Sucrose synthase;^Eukaryota; Viridiplantae; Streptophyta; Embryophyta; Tracheophyta; Spermatophyta; Magnoliophyta; eudicotyledons; Gunneridae; Pentapetalae; rosids; fabids; Fabales; Fabaceae; Papilionoideae; Phaseoleae; Glycine; Soja	PF00862.18^Sucrose_synth^Sucrose synthase^8-306^E:2.6e-120`PF00862.18^Sucrose_synth^Sucrose synthase^312-530^E:1.3e-137`PF00534.19^Glycos_transf_1^Glycosyl transferases group 1^542-717^E:2.5e-31`PF13692.5^Glyco_trans_1_4^Glycosyl transferases group 1^548-697^E:1.1e-08	.	.	COG0438^Glycosyl transferase (Group 1	KEGG:gmx:547508`KO:K00695	GO:0016157^molecular_function^sucrose synthase activity`GO:0009877^biological_process^nodulation`GO:0005985^biological_process^sucrose metabolic process	GO:0016157^molecular_function^sucrose synthase activity`GO:0005985^biological_process^sucrose metabolic process	.	.
XLOC_001041	TCONS_00002008	7.4798	0.97879304726969	4.73465832240987e-08	8.16627006933859e-07	.	.	.	.	.	.	.	.	.	.	.	.	.	.
XLOC_014644	TCONS_00029079	7.47908	6.39117463760639	1.68108509012804e-32	4.98620861240764e-30	PYL4_ARATH^PYL4_ARATH^Q:70-561,H:43-205^69.51%ID^E:1e-57^RecName: Full=Abscisic acid receptor PYL4;^Eukaryota; Viridiplantae; Streptophyta; Embryophyta; Tracheophyta; Spermatophyta; Magnoliophyta; eudicotyledons; Gunneridae; Pentapetalae; rosids; malvids; Brassicales; Brassicaceae; Camelineae; Arabidopsis	.	Gene.46269::TCONS_00029079::g.46269::m.46269	1-564[+]	PYL4_ARATH^PYL4_ARATH^Q:24-187,H:43-205^69.51%ID^E:3e-71^RecName: Full=Abscisic acid receptor PYL4;^Eukaryota; Viridiplantae; Streptophyta; Embryophyta; Tracheophyta; Spermatophyta; Magnoliophyta; eudicotyledons; Gunneridae; Pentapetalae; rosids; malvids; Brassicales; Brassicaceae; Camelineae; Arabidopsis	PF10604.8^Polyketide_cyc2^Polyketide cyclase / dehydrase and lipid transport^34-177^E:1.3e-21`PF03364.19^Polyketide_cyc^Polyketide cyclase / dehydrase and lipid transport^41-149^E:2.7e-05`PF00407.18^Bet_v_1^Pathogenesis-related protein Bet v I family^58-142^E:1.2e-09	.	.	ENOG4111MYF^abscisic acid receptor	KEGG:ath:AT2G38310`KO:K14496	GO:0005737^cellular_component^cytoplasm`GO:0005634^cellular_component^nucleus`GO:0005886^cellular_component^plasma membrane`GO:0010427^molecular_function^abscisic acid binding`GO:0042803^molecular_function^protein homodimerization activity`GO:0004864^molecular_function^protein phosphatase inhibitor activity`GO:0004872^molecular_function^receptor activity`GO:0009738^biological_process^abscisic aci…	GO:0006952^biological_process^defense response`GO:0009607^biological_process^response to biotic stimulus	.	.
XLOC_016250	TCONS_00032276	7.4632	-0.646840564034913	1.28339471997707e-05	0.000115467233558155	MYB65_ARATH^MYB65_ARATH^Q:100-435,H:45-156^87.5%ID^E:8e-65^RecName: Full=Transcription factor MYB65 {ECO:0000303|PubMed:9839469};^Eukaryota; Viridiplantae; Streptophyta; Embryophyta; Tracheophyta; Spermatophyta; Magnoliophyta; eudicotyledons; Gunneridae; Pentapetalae; rosids; malvids; Brassicales; Brassicaceae; Camelineae; Arabidopsis	.	Gene.56983::TCONS_00032276::g.56983::m.56983	1-1503[+]	MYB33_ARATH^MYB33_ARATH^Q:27-499,H:29-513^36.11%ID^E:6e-72^RecName: Full=Transcription factor MYB33 {ECO:0000303|PubMed:11597504};^Eukaryota; Viridiplantae; Streptophyta; Embryophyta; Tracheophyta; Spermatophyta; Magnoliophyta; eudicotyledons; Gunneridae; Pentapetalae; rosids; malvids; Brassicales; Brassicaceae; Camelineae; Arabidopsis	PF00249.30^Myb_DNA-binding^Myb-like DNA-binding domain^32-79^E:2.5e-15`PF13921.5^Myb_DNA-bind_6^Myb-like DNA-binding domain^35-93^E:5.5e-15`PF00249.30^Myb_DNA-binding^Myb-like DNA-binding domain^85-128^E:9.8e-15`PF13921.5^Myb_DNA-bind_6^Myb-like DNA-binding domain^88-131^E:1.9e-05	.	.	COG5147^Myblike DNAbinding domain containing protein	KEGG:ath:AT5G06100`KO:K09422	GO:0005634^cellular_component^nucleus`GO:0000981^molecular_function^RNA polymerase II transcription factor activity, sequence-specific DNA binding`GO:0043565^molecular_function^sequence-specific DNA binding`GO:0001135^molecular_function^transcription factor activity, RNA polymerase II transcription factor recruiting`GO:0003700^molecular_function^DNA binding transcription factor activity`GO:004421…	.	.	.
XLOC_014447	TCONS_00028694	7.45245	-0.664156310059213	6.43339172034808e-05	0.00046245274690607	.	.	.	.	.	.	.	.	.	.	.	.	.	.
XLOC_010034	TCONS_00019831	7.4468	6.97554075474408	3.40226281458472e-41	2.56488087934505e-38	PCO1_ARATH^PCO1_ARATH^Q:381-965,H:57-251^54.77%ID^E:2e-65^RecName: Full=Plant cysteine oxidase 1 {ECO:0000303|PubMed:24599061};^Eukaryota; Viridiplantae; Streptophyta; Embryophyta; Tracheophyta; Spermatophyta; Magnoliophyta; eudicotyledons; Gunneridae; Pentapetalae; rosids; malvids; Brassicales; Brassicaceae; Camelineae; Arabidopsis	.	Gene.32674::TCONS_00019831::g.32674::m.32674	252-998[+]	PCO1_ARATH^PCO1_ARATH^Q:44-244,H:57-257^53.66%ID^E:1e-69^RecName: Full=Plant cysteine oxidase 1 {ECO:0000303|PubMed:24599061};^Eukaryota; Viridiplantae; Streptophyta; Embryophyta; Tracheophyta; Spermatophyta; Magnoliophyta; eudicotyledons; Gunneridae; Pentapetalae; rosids; malvids; Brassicales; Brassicaceae; Camelineae; Arabidopsis	PF07847.11^PCO_ADO^PCO_ADO^74-236^E:6.7e-65	.	.	ENOG4111Y3H^2-aminoethanethiol	KEGG:ath:AT5G15120`KO:K10712	GO:0005829^cellular_component^cytosol`GO:0005634^cellular_component^nucleus`GO:0017172^molecular_function^cysteine dioxygenase activity`GO:0046872^molecular_function^metal ion binding`GO:0009061^biological_process^anaerobic respiration`GO:0070483^biological_process^detection of hypoxia`GO:0018171^biological_process^peptidyl-cysteine oxidation`GO:0001666^biological_process^response to hypoxia	GO:0016702^molecular_function^oxidoreductase activity, acting on single donors with incorporation of molecular oxygen, incorporation of two atoms of oxygen`GO:0055114^biological_process^oxidation-reduction process	.	.
XLOC_006820	TCONS_00013508	7.4421	9.750632753087	8.20291840957252e-48	1.48415402784396e-44	RH47_ARATH^RH47_ARATH^Q:1099-2760,H:1-547^61.55%ID^E:0^RecName: Full=DEAD-box ATP-dependent RNA helicase 47, mitochondrial;^Eukaryota; Viridiplantae; Streptophyta; Embryophyta; Tracheophyta; Spermatophyta; Magnoliophyta; eudicotyledons; Gunneridae; Pentapetalae; rosids; malvids; Brassicales; Brassicaceae; Camelineae; Arabidopsis	.	Gene.17651::TCONS_00013508::g.17651::m.17651	1099-2766[+]	RH47_ARATH^RH47_ARATH^Q:1-554,H:1-547^61.55%ID^E:0^RecName: Full=DEAD-box ATP-dependent RNA helicase 47, mitochondrial;^Eukaryota; Viridiplantae; Streptophyta; Embryophyta; Tracheophyta; Spermatophyta; Magnoliophyta; eudicotyledons; Gunneridae; Pentapetalae; rosids; malvids; Brassicales; Brassicaceae; Camelineae; Arabidopsis	PF00270.28^DEAD^DEAD/DEAH box helicase^135-330^E:8.5e-42`PF04851.14^ResIII^Type III restriction enzyme, res subunit^146-277^E:1.7e-05`PF00271.30^Helicase_C^Helicase conserved C-terminal domain^404-509^E:9.3e-21	.	.	COG0513^purine NTP-dependent helicase activity	KEGG:ath:AT1G12770	GO:0005739^cellular_component^mitochondrion`GO:0005730^cellular_component^nucleolus`GO:0005524^molecular_function^ATP binding`GO:0004004^molecular_function^ATP-dependent RNA helicase activity`GO:0003723^molecular_function^RNA binding`GO:0009663^biological_process^plasmodesma organization`GO:0010497^biological_process^plasmodesmata-mediated intercellular transport`GO:0010501^biological_process^RNA…	GO:0003676^molecular_function^nucleic acid binding`GO:0005524^molecular_function^ATP binding`GO:0003677^molecular_function^DNA binding`GO:0016787^molecular_function^hydrolase activity	.	.
XLOC_017359	TCONS_00034377	7.40952	0.912921356161859	1.42814785060032e-07	2.18423322577443e-06	.	.	Gene.58501::TCONS_00034377::g.58501::m.58501	105-470[+]	.	.	.	.	.	.	.	.	.	.
XLOC_007485	TCONS_00014755	7.40407	2.65082768220612	2.89939306367753e-13	1.24901711193137e-11	.	.	.	.	.	.	.	.	.	.	.	.	.	.
XLOC_017237	TCONS_00034125	7.34554	-0.72582720124314	2.79664710086181e-05	0.000226397029064397	WLIM1_ARATH^WLIM1_ARATH^Q:916-1461,H:5-190^76.34%ID^E:1e-93^RecName: Full=LIM domain-containing protein WLIM1 {ECO:0000305};^Eukaryota; Viridiplantae; Streptophyta; Embryophyta; Tracheophyta; Spermatophyta; Magnoliophyta; eudicotyledons; Gunneridae; Pentapetalae; rosids; malvids; Brassicales; Brassicaceae; Camelineae; Arabidopsis`WLIM1_ARATH^WLIM1_ARATH^Q:1204-1419,H:3-74^44.44%ID^E:3e-11^RecName…	.	Gene.57733::TCONS_00034125::g.57733::m.57733	934-1506[+]	WLIM1_ARATH^WLIM1_ARATH^Q:1-176,H:11-190^75.56%ID^E:6e-95^RecName: Full=LIM domain-containing protein WLIM1 {ECO:0000305};^Eukaryota; Viridiplantae; Streptophyta; Embryophyta; Tracheophyta; Spermatophyta; Magnoliophyta; eudicotyledons; Gunneridae; Pentapetalae; rosids; malvids; Brassicales; Brassicaceae; Camelineae; Arabidopsis`WLIM1_ARATH^WLIM1_ARATH^Q:91-162,H:3-74^44.44%ID^E:9e-13^RecName: Ful…	PF00412.21^LIM^LIM domain^2-54^E:1.6e-09`PF00412.21^LIM^LIM domain^98-153^E:2.4e-12	.	.	COG5069^Microtubule associated monoxygenase, calponin and LIM domain containing	KEGG:ath:AT1G10200	GO:0005737^cellular_component^cytoplasm`GO:0005856^cellular_component^cytoskeleton`GO:0005886^cellular_component^plasma membrane`GO:0051015^molecular_function^actin filament binding`GO:0046872^molecular_function^metal ion binding`GO:0003729^molecular_function^mRNA binding`GO:0051017^biological_process^actin filament bundle assembly	.	.	.
XLOC_009427	TCONS_00018563	7.32769	10.7870731930529	6.78161512544507e-41	4.71922163325683e-38	TSJT1_TOBAC^TSJT1_TOBAC^Q:60-509,H:1-148^40.67%ID^E:1e-29^RecName: Full=Stem-specific protein TSJT1;^Eukaryota; Viridiplantae; Streptophyta; Embryophyta; Tracheophyta; Spermatophyta; Magnoliophyta; eudicotyledons; Gunneridae; Pentapetalae; asterids; lamiids; Solanales; Solanaceae; Nicotianoideae; Nicotianeae; Nicotiana	.	Gene.35710::TCONS_00018563::g.35710::m.35710	60-824[+]	TSJT1_TOBAC^TSJT1_TOBAC^Q:1-150,H:1-148^40.67%ID^E:2e-30^RecName: Full=Stem-specific protein TSJT1;^Eukaryota; Viridiplantae; Streptophyta; Embryophyta; Tracheophyta; Spermatophyta; Magnoliophyta; eudicotyledons; Gunneridae; Pentapetalae; asterids; lamiids; Solanales; Solanaceae; Nicotianoideae; Nicotianeae; Nicotiana	PF12481.7^DUF3700^Aluminium induced protein^2-230^E:1.7e-110	.	.	.	.	.	.	.	.
XLOC_007781	TCONS_00015295	7.31478	5.8169196441994	5.44635645456226e-43	5.47449596291083e-40	PGLR_ACTDE^PGLR_ACTDE^Q:151-1068,H:32-345^59.18%ID^E:8e-122^RecName: Full=Polygalacturonase;^Eukaryota; Viridiplantae; Streptophyta; Embryophyta; Tracheophyta; Spermatophyta; Magnoliophyta; eudicotyledons; Gunneridae; Pentapetalae; asterids; Ericales; Actinidiaceae; Actinidia`PGLR_ACTDE^PGLR_ACTDE^Q:1080-1415,H:345-455^58.04%ID^E:8e-122^RecName: Full=Polygalacturonase;^Eukaryota; Viridiplantae; S…	.	Gene.24122::TCONS_00015295::g.24122::m.24122	58-1110[+]	PGLR_ACTDE^PGLR_ACTDE^Q:3-337,H:1-345^56.61%ID^E:1e-119^RecName: Full=Polygalacturonase;^Eukaryota; Viridiplantae; Streptophyta; Embryophyta; Tracheophyta; Spermatophyta; Magnoliophyta; eudicotyledons; Gunneridae; Pentapetalae; asterids; Ericales; Actinidiaceae; Actinidia	PF12708.6^Pectate_lyase_3^Pectate lyase superfamily protein^81-321^E:1.3e-07`PF00295.16^Glyco_hydro_28^Glycosyl hydrolases family 28^108-339^E:3.9e-69	sigP:1^24^0.882^YES	ExpAA=19.52^PredHel=1^Topology=i9-27o	.	.	GO:0005618^cellular_component^cell wall`GO:0005576^cellular_component^extracellular region`GO:0004650^molecular_function^polygalacturonase activity`GO:0005975^biological_process^carbohydrate metabolic process`GO:0071555^biological_process^cell wall organization`GO:0009835^biological_process^fruit ripening	GO:0004650^molecular_function^polygalacturonase activity`GO:0005975^biological_process^carbohydrate metabolic process	.	.
XLOC_014589	TCONS_00028964	7.20661	2.95484278409806	1.29643668146719e-15	7.66549963326334e-14	DTX34_ARATH^DTX34_ARATH^Q:115-1548,H:51-530^74.79%ID^E:0^RecName: Full=Protein DETOXIFICATION 34 {ECO:0000303|PubMed:11739388};^Eukaryota; Viridiplantae; Streptophyta; Embryophyta; Tracheophyta; Spermatophyta; Magnoliophyta; eudicotyledons; Gunneridae; Pentapetalae; rosids; malvids; Brassicales; Brassicaceae; Camelineae; Arabidopsis	.	Gene.45911::TCONS_00028964::g.45911::m.45911	112-1587[+]	DTX34_ARATH^DTX34_ARATH^Q:2-479,H:51-530^74.79%ID^E:0^RecName: Full=Protein DETOXIFICATION 34 {ECO:0000303|PubMed:11739388};^Eukaryota; Viridiplantae; Streptophyta; Embryophyta; Tracheophyta; Spermatophyta; Magnoliophyta; eudicotyledons; Gunneridae; Pentapetalae; rosids; malvids; Brassicales; Brassicaceae; Camelineae; Arabidopsis	PF01554.17^MatE^MatE^47-204^E:1.4e-28`PF01554.17^MatE^MatE^267-429^E:5.9e-29	.	ExpAA=249.18^PredHel=11^Topology=o48-70i77-99o122-144i187-209o219-241i261-283o293-315i338-360o380-402i409-431o441-460i	COG0534^Mate efflux family protein	KEGG:ath:AT4G00350`KO:K03327	GO:0016021^cellular_component^integral component of membrane`GO:0015297^molecular_function^antiporter activity`GO:0015238^molecular_function^drug transmembrane transporter activity`GO:0006855^biological_process^drug transmembrane transport	GO:0015238^molecular_function^drug transmembrane transporter activity`GO:0015297^molecular_function^antiporter activity`GO:0006855^biological_process^drug transmembrane transport`GO:0055085^biological_process^transmembrane transport`GO:0016020^cellular_component^membrane	.	.
XLOC_010727	TCONS_00021185	7.19981	0.81339135072186	2.21296018263396e-07	3.22895875680615e-06	.	.	.	.	.	.	.	.	.	.	.	.	.	.
XLOC_015674	TCONS_00031206	7.16522	7.1292974404468	4.62696322027653e-37	2.20304330380166e-34	.	.	.	.	.	.	.	.	.	.	.	.	.	.
XLOC_017765	TCONS_00035183	7.12765	4.57519481081357	1.79460099415974e-27	3.2797692714477e-25	.	.	Gene.61284::TCONS_00035183::g.61284::m.61284	1-306[+]	.	PF05553.10^DUF761^Cotton fibre expressed protein^65-98^E:3.6e-13	.	.	.	.	.	.	.	.
XLOC_012385	TCONS_00024417	7.11508	2.73728013851302	1.94488053406499e-14	9.87046754553523e-13	.	.	Gene.40058::TCONS_00024417::g.40058::m.40058	1-492[+]	.	.	.	ExpAA=28.28^PredHel=1^Topology=o44-66i	.	.	.	.	.	.
XLOC_002575	TCONS_00005061	7.1019	6.69333043972854	4.71868015942678e-32	1.35516000197633e-29	P2A09_ARATH^P2A09_ARATH^Q:22-546,H:6-180^40.66%ID^E:2e-34^RecName: Full=Protein PHLOEM PROTEIN 2-LIKE A9;^Eukaryota; Viridiplantae; Streptophyta; Embryophyta; Tracheophyta; Spermatophyta; Magnoliophyta; eudicotyledons; Gunneridae; Pentapetalae; rosids; malvids; Brassicales; Brassicaceae; Camelineae; Arabidopsis	.	Gene.8755::TCONS_00005061::g.8755::m.8755	1-555[+]	P2A09_ARATH^P2A09_ARATH^Q:8-182,H:6-180^40.66%ID^E:9e-35^RecName: Full=Protein PHLOEM PROTEIN 2-LIKE A9;^Eukaryota; Viridiplantae; Streptophyta; Embryophyta; Tracheophyta; Spermatophyta; Magnoliophyta; eudicotyledons; Gunneridae; Pentapetalae; rosids; malvids; Brassicales; Brassicaceae; Camelineae; Arabidopsis	PF14299.5^PP2^Phloem protein 2^25-177^E:2.1e-21	.	.	ENOG410YWN9^Protein PHLOEM PROTEIN 2-LIKE	KEGG:ath:AT1G31200	GO:0030246^molecular_function^carbohydrate binding	.	.	.
XLOC_006110	TCONS_00012041	7.03279	7.93527139582433	6.96425229131112e-35	2.37743805106966e-32	.	.	Gene.25439::TCONS_00012041::g.25439::m.25439	2-1555[+]	.	PF13837.5^Myb_DNA-bind_4^Myb/SANT-like DNA-binding domain^172-298^E:3e-21	.	ExpAA=44.59^PredHel=2^Topology=o13-35i55-77o	.	.	.	.	.	.
XLOC_018058	TCONS_00035675	7.02834	-1.03328532385601	0.000270084843394238	0.00158657307517271	EF1A_ORYSJ^EF1A_ORYSJ^Q:439-2,H:156-328^80.92%ID^E:1e-90^RecName: Full=Elongation factor 1-alpha;^Eukaryota; Viridiplantae; Streptophyta; Embryophyta; Tracheophyta; Spermatophyta; Magnoliophyta; Liliopsida; Poales; Poaceae; BOP clade; Oryzoideae; Oryzeae; Oryzinae; Oryza; Oryza sativa	.	Gene.62460::TCONS_00035675::g.62460::m.62460	2-439[-]	EF1A_ORYSJ^EF1A_ORYSJ^Q:1-146,H:156-328^80.92%ID^E:9e-91^RecName: Full=Elongation factor 1-alpha;^Eukaryota; Viridiplantae; Streptophyta; Embryophyta; Tracheophyta; Spermatophyta; Magnoliophyta; Liliopsida; Poales; Poaceae; BOP clade; Oryzoideae; Oryzeae; Oryzinae; Oryza; Oryza sativa	PF03144.24^GTP_EFTU_D2^Elongation factor Tu domain 2^66-131^E:6.1e-15	.	.	COG5256^This protein promotes the GTP-dependent binding of aminoacyl-tRNA to the A-site of ribosomes during protein biosynthesis (By similarity)	KEGG:osa:4331810`KEGG:osa:4331811`KEGG:osa:4331812`KEGG:osa:4331813`KO:K03231	GO:0005737^cellular_component^cytoplasm`GO:0005622^cellular_component^intracellular`GO:0005525^molecular_function^GTP binding`GO:0003924^molecular_function^GTPase activity`GO:0003746^molecular_function^translation elongation factor activity	GO:0005525^molecular_function^GTP binding	.	.
XLOC_011956	TCONS_00023613	7.01739	-0.998081147522765	8.77732691316125e-05	0.000604063049980321	.	.	.	.	.	.	.	.	.	.	.	.	.	.
XLOC_004719	TCONS_00009253	7.00802	4.65997320808221	1.51565378764485e-29	3.56139272465692e-27	PER55_ARATH^PER55_ARATH^Q:688-1449,H:75-330^65.76%ID^E:2e-97^RecName: Full=Peroxidase 55;^Eukaryota; Viridiplantae; Streptophyta; Embryophyta; Tracheophyta; Spermatophyta; Magnoliophyta; eudicotyledons; Gunneridae; Pentapetalae; rosids; malvids; Brassicales; Brassicaceae; Camelineae; Arabidopsis`PER55_ARATH^PER55_ARATH^Q:43-237,H:15-77^56.92%ID^E:2e-14^RecName: Full=Peroxidase 55;^Eukaryota; Viri…	.	Gene.15862::TCONS_00009253::g.15862::m.15862	715-1452[+]	PER55_ARATH^PER55_ARATH^Q:1-245,H:84-330^65.32%ID^E:4e-107^RecName: Full=Peroxidase 55;^Eukaryota; Viridiplantae; Streptophyta; Embryophyta; Tracheophyta; Spermatophyta; Magnoliophyta; eudicotyledons; Gunneridae; Pentapetalae; rosids; malvids; Brassicales; Brassicaceae; Camelineae; Arabidopsis	PF00141.22^peroxidase^Peroxidase^8-208^E:1e-59	.	.	ENOG410YDU7^peroxidase	KEGG:ath:AT5G14130`KO:K00430	GO:0005576^cellular_component^extracellular region`GO:0020037^molecular_function^heme binding`GO:0046872^molecular_function^metal ion binding`GO:0004601^molecular_function^peroxidase activity`GO:0042744^biological_process^hydrogen peroxide catabolic process`GO:0006979^biological_process^response to oxidative stress	GO:0004601^molecular_function^peroxidase activity`GO:0020037^molecular_function^heme binding`GO:0006979^biological_process^response to oxidative stress`GO:0055114^biological_process^oxidation-reduction process	.	.
XLOC_010701	TCONS_00021142	6.97898	10.1655166888976	1.70394892039593e-33	5.23827836876513e-31	ITH5_CUCMA^ITH5_CUCMA^Q:34-225,H:5-68^59.38%ID^E:1e-15^RecName: Full=Inhibitor of trypsin and hageman factor;^Eukaryota; Viridiplantae; Streptophyta; Embryophyta; Tracheophyta; Spermatophyta; Magnoliophyta; eudicotyledons; Gunneridae; Pentapetalae; rosids; fabids; Cucurbitales; Cucurbitaceae; Cucurbiteae; Cucurbita	.	.	.	.	.	.	.	.	.	GO:0004867^molecular_function^serine-type endopeptidase inhibitor activity`GO:0009611^biological_process^response to wounding	.	.	.
XLOC_016015	TCONS_00031858	6.97872	0.598714061316839	1.52639884041277e-07	2.31493161941225e-06	.	.	.	.	.	.	.	.	.	.	.	.	.	.
XLOC_000450	TCONS_00000865	6.94835	3.9223296428931	8.27521469919228e-20	8.4589525170896e-18	.	.	.	.	.	.	.	.	.	.	.	.	.	.
XLOC_010355	TCONS_00020479	6.89939	2.98595804857248	1.23778037482121e-14	6.49135081786671e-13	DOGL3_ARATH^DOGL3_ARATH^Q:31-765,H:18-255^27.91%ID^E:2e-26^RecName: Full=Protein DOG1-like 3 {ECO:0000303|PubMed:17065317};^Eukaryota; Viridiplantae; Streptophyta; Embryophyta; Tracheophyta; Spermatophyta; Magnoliophyta; eudicotyledons; Gunneridae; Pentapetalae; rosids; malvids; Brassicales; Brassicaceae; Camelineae; Arabidopsis	.	Gene.34757::TCONS_00020479::g.34757::m.34757	1-768[+]	DOGL3_ARATH^DOGL3_ARATH^Q:11-255,H:18-255^29.07%ID^E:7e-29^RecName: Full=Protein DOG1-like 3 {ECO:0000303|PubMed:17065317};^Eukaryota; Viridiplantae; Streptophyta; Embryophyta; Tracheophyta; Spermatophyta; Magnoliophyta; eudicotyledons; Gunneridae; Pentapetalae; rosids; malvids; Brassicales; Brassicaceae; Camelineae; Arabidopsis	PF14144.5^DOG1^Seed dormancy control^37-96^E:2.1e-23	.	.	ENOG410YM4K^Delay of germination 1	KEGG:ath:AT4G18690	GO:0043565^molecular_function^sequence-specific DNA binding`GO:0006351^biological_process^transcription, DNA-templated	GO:0043565^molecular_function^sequence-specific DNA binding`GO:0006351^biological_process^transcription, DNA-templated	.	.
XLOC_015002	TCONS_00029827	6.83132	3.80426572654061	4.23527704051896e-22	5.32144913153539e-20	ASY3_ARATH^ASY3_ARATH^Q:282-1532,H:1-478^28.23%ID^E:3e-20^RecName: Full=Meiosis-specific protein ASY3 {ECO:0000305};^Eukaryota; Viridiplantae; Streptophyta; Embryophyta; Tracheophyta; Spermatophyta; Magnoliophyta; eudicotyledons; Gunneridae; Pentapetalae; rosids; malvids; Brassicales; Brassicaceae; Camelineae; Arabidopsis	.	Gene.48745::TCONS_00029827::g.48745::m.48745	234-2318[+]	ASY3_ARATH^ASY3_ARATH^Q:17-694,H:1-791^27.7%ID^E:6e-43^RecName: Full=Meiosis-specific protein ASY3 {ECO:0000305};^Eukaryota; Viridiplantae; Streptophyta; Embryophyta; Tracheophyta; Spermatophyta; Magnoliophyta; eudicotyledons; Gunneridae; Pentapetalae; rosids; malvids; Brassicales; Brassicaceae; Camelineae; Arabidopsis	.	.	.	ENOG410YPP3^NA	KEGG:ath:AT2G46980	GO:0005694^cellular_component^chromosome`GO:0005730^cellular_component^nucleolus`GO:0051321^biological_process^meiotic cell cycle`GO:0090173^biological_process^regulation of synaptonemal complex assembly	.	.	.
XLOC_013141	TCONS_00026061	6.775	-1.22017927368274	0.000283239048820086	0.0016462075522974	SPH1_ARATH^SPH1_ARATH^Q:1-441,H:1-147^31.13%ID^E:6e-15^RecName: Full=S-protein homolog 1 {ECO:0000303|PubMed:10344198};^Eukaryota; Viridiplantae; Streptophyta; Embryophyta; Tracheophyta; Spermatophyta; Magnoliophyta; eudicotyledons; Gunneridae; Pentapetalae; rosids; malvids; Brassicales; Brassicaceae; Camelineae; Arabidopsis	.	Gene.46026::TCONS_00026061::g.46026::m.46026	1-450[+]	SPH1_ARATH^SPH1_ARATH^Q:1-147,H:1-147^31.13%ID^E:5e-15^RecName: Full=S-protein homolog 1 {ECO:0000303|PubMed:10344198};^Eukaryota; Viridiplantae; Streptophyta; Embryophyta; Tracheophyta; Spermatophyta; Magnoliophyta; eudicotyledons; Gunneridae; Pentapetalae; rosids; malvids; Brassicales; Brassicaceae; Camelineae; Arabidopsis	PF05938.10^Self-incomp_S1^Plant self-incompatibility protein S1^40-147^E:8.5e-23	sigP:1^22^0.796^YES	.	ENOG410ZGCR^Plant self-incompatibility protein S1	KEGG:ath:AT4G16295	GO:0005576^cellular_component^extracellular region`GO:0009875^biological_process^pollen-pistil interaction`GO:0060320^biological_process^rejection of self pollen	.	.	.
XLOC_017344	TCONS_00034345	6.76313	1.58905585770739	2.34448559191378e-09	5.17933795048792e-08	NIPL2_ARATH^NIPL2_ARATH^Q:343-627,H:126-219^42.27%ID^E:1e-18^RecName: Full=NEP1-interacting protein-like 2;^Eukaryota; Viridiplantae; Streptophyta; Embryophyta; Tracheophyta; Spermatophyta; Magnoliophyta; eudicotyledons; Gunneridae; Pentapetalae; rosids; malvids; Brassicales; Brassicaceae; Camelineae; Arabidopsis	.	Gene.58388::TCONS_00034345::g.58388::m.58388	1-639[+]	NIPL1_ARATH^NIPL1_ARATH^Q:47-209,H:34-219^31.38%ID^E:1e-23^RecName: Full=NEP1-interacting protein-like 1;^Eukaryota; Viridiplantae; Streptophyta; Embryophyta; Tracheophyta; Spermatophyta; Magnoliophyta; eudicotyledons; Gunneridae; Pentapetalae; rosids; malvids; Brassicales; Brassicaceae; Camelineae; Arabidopsis	PF13639.5^zf-RING_2^Ring finger domain^165-208^E:2.9e-13`PF17123.4^zf-RING_11^RING-like zinc finger^166-194^E:4.2e-09`PF13923.5^zf-C3HC4_2^Zinc finger, C3HC4 type (RING finger)^166-207^E:1.8e-08`PF00097.24^zf-C3HC4^Zinc finger, C3HC4 type (RING finger)^166-207^E:1.1e-05`PF13445.5^zf-RING_UBOX^RING-type zinc-finger^166-205^E:0.00048	.	ExpAA=41.90^PredHel=2^Topology=i44-66o76-98i	.	KEGG:ath:AT5G66070	GO:0016021^cellular_component^integral component of membrane`GO:0046872^molecular_function^metal ion binding`GO:0061630^molecular_function^ubiquitin protein ligase activity`GO:0006952^biological_process^defense response`GO:0043161^biological_process^proteasome-mediated ubiquitin-dependent protein catabolic process	GO:0046872^molecular_function^metal ion binding	.	.
XLOC_005220	TCONS_00010312	6.69067	11.4020999259529	2.71079080263177e-34	8.91751599854846e-32	PME2_CITSI^PME2_CITSI^Q:100-1557,H:23-510^64.65%ID^E:0^RecName: Full=Pectinesterase 2;^Eukaryota; Viridiplantae; Streptophyta; Embryophyta; Tracheophyta; Spermatophyta; Magnoliophyta; eudicotyledons; Gunneridae; Pentapetalae; rosids; malvids; Sapindales; Rutaceae; Aurantioideae; Citrus	.	Gene.19401::TCONS_00010312::g.19401::m.19401	31-1560[+]	PME2_CITSI^PME2_CITSI^Q:6-509,H:5-510^63.55%ID^E:0^RecName: Full=Pectinesterase 2;^Eukaryota; Viridiplantae; Streptophyta; Embryophyta; Tracheophyta; Spermatophyta; Magnoliophyta; eudicotyledons; Gunneridae; Pentapetalae; rosids; malvids; Sapindales; Rutaceae; Aurantioideae; Citrus	PF04043.14^PMEI^Plant invertase/pectin methylesterase inhibitor^28-165^E:8.4e-24`PF01095.18^Pectinesterase^Pectinesterase^207-494^E:1.5e-136	sigP:1^23^0.849^YES	ExpAA=16.16^PredHel=1^Topology=i5-22o	.	KEGG:cit:102577945`KO:K01051	GO:0005618^cellular_component^cell wall`GO:0005576^cellular_component^extracellular region`GO:0045330^molecular_function^aspartyl esterase activity`GO:0004857^molecular_function^enzyme inhibitor activity`GO:0030599^molecular_function^pectinesterase activity`GO:0042545^biological_process^cell wall modification`GO:0045490^biological_process^pectin catabolic process	GO:0004857^molecular_function^enzyme inhibitor activity`GO:0030599^molecular_function^pectinesterase activity`GO:0042545^biological_process^cell wall modification`GO:0005618^cellular_component^cell wall	.	.
XLOC_017662	TCONS_00035003	6.65737	5.72250718401685	7.13687589564705e-15	3.88938239698621e-13	PER5_VITVI^PER5_VITVI^Q:197-979,H:72-328^50%ID^E:3e-72^RecName: Full=Peroxidase 5 {ECO:0000250|UniProtKB:P22195};^Eukaryota; Viridiplantae; Streptophyta; Embryophyta; Tracheophyta; Spermatophyta; Magnoliophyta; eudicotyledons; Gunneridae; Pentapetalae; rosids; Vitales; Vitaceae; Vitis	.	Gene.60669::TCONS_00035003::g.60669::m.60669	542-982[+]	PER5_VITVI^PER5_VITVI^Q:1-146,H:188-328^47.26%ID^E:7e-33^RecName: Full=Peroxidase 5 {ECO:0000250|UniProtKB:P22195};^Eukaryota; Viridiplantae; Streptophyta; Embryophyta; Tracheophyta; Spermatophyta; Magnoliophyta; eudicotyledons; Gunneridae; Pentapetalae; rosids; Vitales; Vitaceae; Vitis	PF00141.22^peroxidase^Peroxidase^1-108^E:3e-20	.	.	ENOG410YDTD^peroxidase	.	GO:0005576^cellular_component^extracellular region`GO:0020037^molecular_function^heme binding`GO:0046872^molecular_function^metal ion binding`GO:0004601^molecular_function^peroxidase activity`GO:0042744^biological_process^hydrogen peroxide catabolic process`GO:0006979^biological_process^response to oxidative stress	GO:0004601^molecular_function^peroxidase activity`GO:0020037^molecular_function^heme binding`GO:0006979^biological_process^response to oxidative stress`GO:0055114^biological_process^oxidation-reduction process	.	.
XLOC_017097	TCONS_00033869	6.64092	4.14216116350482	1.921017566651e-19	1.88896580616394e-17	.	.	Gene.56903::TCONS_00033869::g.56903::m.56903	2-316[+]	.	PF05498.10^RALF^Rapid ALkalinization Factor (RALF)^42-102^E:2.5e-05	.	ExpAA=20.51^PredHel=1^Topology=o23-45i	.	.	.	.	.	.
XLOC_007850	TCONS_00015419	6.63358	12.803099539001	1.44574086630662e-40	9.34206767645917e-38	PDC1_ARATH^PDC1_ARATH^Q:71-1885,H:1-607^85.83%ID^E:0^RecName: Full=Pyruvate decarboxylase 1;^Eukaryota; Viridiplantae; Streptophyta; Embryophyta; Tracheophyta; Spermatophyta; Magnoliophyta; eudicotyledons; Gunneridae; Pentapetalae; rosids; malvids; Brassicales; Brassicaceae; Camelineae; Arabidopsis	.	Gene.24579::TCONS_00015419::g.24579::m.24579	71-1888[+]	PDC1_ARATH^PDC1_ARATH^Q:1-605,H:1-607^85.83%ID^E:0^RecName: Full=Pyruvate decarboxylase 1;^Eukaryota; Viridiplantae; Streptophyta; Embryophyta; Tracheophyta; Spermatophyta; Magnoliophyta; eudicotyledons; Gunneridae; Pentapetalae; rosids; malvids; Brassicales; Brassicaceae; Camelineae; Arabidopsis	PF02776.17^TPP_enzyme_N^Thiamine pyrophosphate enzyme, N-terminal TPP binding domain^44-211^E:5e-34`PF00205.21^TPP_enzyme_M^Thiamine pyrophosphate enzyme, central domain^241-358^E:8.5e-20`PF02775.20^TPP_enzyme_C^Thiamine pyrophosphate enzyme, C-terminal TPP binding domain^451-576^E:2.6e-15	.	.	COG3961^Pyruvate decarboxylase	KEGG:ath:AT4G33070`KO:K01568	GO:0005829^cellular_component^cytosol`GO:0016020^cellular_component^membrane`GO:0016831^molecular_function^carboxy-lyase activity`GO:0000287^molecular_function^magnesium ion binding`GO:0004737^molecular_function^pyruvate decarboxylase activity`GO:0030976^molecular_function^thiamine pyrophosphate binding`GO:0034059^biological_process^response to anoxia	GO:0030976^molecular_function^thiamine pyrophosphate binding`GO:0000287^molecular_function^magnesium ion binding`GO:0003824^molecular_function^catalytic activity	.	.
XLOC_010601	TCONS_00020965	6.61691	5.06445891856848	1.10085360193623e-35	4.23781791911324e-33	SYTM2_ARATH^SYTM2_ARATH^Q:337-672,H:86-194^70.54%ID^E:3e-42^RecName: Full=Threonine--tRNA ligase, chloroplastic/mitochondrial 2 {ECO:0000305};^Eukaryota; Viridiplantae; Streptophyta; Embryophyta; Tracheophyta; Spermatophyta; Magnoliophyta; eudicotyledons; Gunneridae; Pentapetalae; rosids; malvids; Brassicales; Brassicaceae; Camelineae; Arabidopsis	.	.	.	.	.	.	.	COG0441^threonine-tRNA ligase activity	KEGG:ath:AT2G04842`KO:K01868	GO:0009507^cellular_component^chloroplast`GO:0009570^cellular_component^chloroplast stroma`GO:0005739^cellular_component^mitochondrion`GO:0005524^molecular_function^ATP binding`GO:0046872^molecular_function^metal ion binding`GO:0004829^molecular_function^threonine-tRNA ligase activity`GO:0009793^biological_process^embryo development ending in seed dormancy`GO:0006435^biological_process^threonyl-t…	.	.	.
XLOC_008501	TCONS_00016660	6.6113	6.70301422769186	7.87763798590772e-30	1.92608248755444e-27	EXLB1_ORYSJ^EXLB1_ORYSJ^Q:46-762,H:12-253^53.31%ID^E:2e-92^RecName: Full=Expansin-like B1;^Eukaryota; Viridiplantae; Streptophyta; Embryophyta; Tracheophyta; Spermatophyta; Magnoliophyta; Liliopsida; Poales; Poaceae; BOP clade; Oryzoideae; Oryzeae; Oryzinae; Oryza; Oryza sativa	.	Gene.29302::TCONS_00016660::g.29302::m.29302	1-768[+]	EXLB1_ORYSJ^EXLB1_ORYSJ^Q:13-254,H:12-253^53.06%ID^E:8e-93^RecName: Full=Expansin-like B1;^Eukaryota; Viridiplantae; Streptophyta; Embryophyta; Tracheophyta; Spermatophyta; Magnoliophyta; Liliopsida; Poales; Poaceae; BOP clade; Oryzoideae; Oryzeae; Oryzinae; Oryza; Oryza sativa	PF03330.17^DPBB_1^Lytic transglycolase^69-143^E:1.3e-08`PF01357.20^Pollen_allerg_1^Pollen allergen^155-236^E:2.8e-13	sigP:1^25^0.743^YES	.	ENOG410Y95B^expansin-like	KEGG:osa:9269361	GO:0005576^cellular_component^extracellular region	.	.	.
XLOC_010987	TCONS_00021672	6.56614	3.01613196149939	1.72053541291975e-13	7.59259688437975e-12	FLS2_ARATH^FLS2_ARATH^Q:111-2687,H:23-813^30.29%ID^E:1e-57^RecName: Full=LRR receptor-like serine/threonine-protein kinase FLS2;^Eukaryota; Viridiplantae; Streptophyta; Embryophyta; Tracheophyta; Spermatophyta; Magnoliophyta; eudicotyledons; Gunneridae; Pentapetalae; rosids; malvids; Brassicales; Brassicaceae; Camelineae; Arabidopsis	.	Gene.38761::TCONS_00021672::g.38761::m.38761	24-2876[+]	FLS2_ARATH^FLS2_ARATH^Q:24-888,H:16-813^31.13%ID^E:2e-72^RecName: Full=LRR receptor-like serine/threonine-protein kinase FLS2;^Eukaryota; Viridiplantae; Streptophyta; Embryophyta; Tracheophyta; Spermatophyta; Magnoliophyta; eudicotyledons; Gunneridae; Pentapetalae; rosids; malvids; Brassicales; Brassicaceae; Camelineae; Arabidopsis	PF08263.11^LRRNT_2^Leucine rich repeat N-terminal domain^36-74^E:4e-15`PF00560.32^LRR_1^Leucine Rich Repeat^244-264^E:1.8`PF00560.32^LRR_1^Leucine Rich Repeat^375-397^E:0.23`PF00560.32^LRR_1^Leucine Rich Repeat^400-422^E:0.68`PF13516.5^LRR_6^Leucine Rich repeat^500-511^E:0.84`PF13855.5^LRR_8^Leucine rich repeat^621-680^E:9.4e-08`PF00560.32^LRR_1^Leucine Rich Repeat^670-691^E:1.6`PF08263.11^LRRNT_…	sigP:1^31^0.843^YES	ExpAA=45.56^PredHel=2^Topology=i12-34o880-902i	COG0515^Serine Threonine protein kinase`COG4886^leucine Rich Repeat	KEGG:ath:AT5G46330`KO:K13420	GO:0005768^cellular_component^endosome`GO:0010008^cellular_component^endosome membrane`GO:0016021^cellular_component^integral component of membrane`GO:0016020^cellular_component^membrane`GO:0005886^cellular_component^plasma membrane`GO:0005524^molecular_function^ATP binding`GO:0004675^molecular_function^transmembrane receptor protein serine/threonine kinase activity`GO:0052544^biological_process^…	GO:0005515^molecular_function^protein binding	.	.
XLOC_001080	TCONS_00002081	6.52052	5.44952699083353	2.52322610446234e-37	1.26813138633436e-34	MSL10_ARATH^MSL10_ARATH^Q:133-2253,H:28-730^51.25%ID^E:0^RecName: Full=Mechanosensitive ion channel protein 10;^Eukaryota; Viridiplantae; Streptophyta; Embryophyta; Tracheophyta; Spermatophyta; Magnoliophyta; eudicotyledons; Gunneridae; Pentapetalae; rosids; malvids; Brassicales; Brassicaceae; Camelineae; Arabidopsis	.	Gene.7365::TCONS_00002081::g.7365::m.7365	1-2289[+]	MSL10_ARATH^MSL10_ARATH^Q:45-751,H:28-730^51.67%ID^E:0^RecName: Full=Mechanosensitive ion channel protein 10;^Eukaryota; Viridiplantae; Streptophyta; Embryophyta; Tracheophyta; Spermatophyta; Magnoliophyta; eudicotyledons; Gunneridae; Pentapetalae; rosids; malvids; Brassicales; Brassicaceae; Camelineae; Arabidopsis	PF00924.17^MS_channel^Mechanosensitive ion channel^536-741^E:2.1e-23	.	ExpAA=131.11^PredHel=6^Topology=i188-210o225-247i268-286o306-328i537-559o569-591i	COG0668^Mechanosensitive ion channel	KEGG:ath:AT5G12080`KO:K22048	GO:0016021^cellular_component^integral component of membrane`GO:0005886^cellular_component^plasma membrane`GO:0008381^molecular_function^mechanically-gated ion channel activity`GO:0006820^biological_process^anion transport`GO:0050982^biological_process^detection of mechanical stimulus`GO:0010150^biological_process^leaf senescence`GO:0097468^biological_process^programmed cell death in response to …	GO:0055085^biological_process^transmembrane transport`GO:0016020^cellular_component^membrane	.	.
XLOC_002032	TCONS_00003943	6.50978	1.43287342358874	1.06440912951554e-07	1.6878487625175e-06	.	.	.	.	.	.	.	.	.	.	.	.	.	.
XLOC_014635	TCONS_00029064	6.50582	0.15056294912398	3.3235552443628e-06	3.56661239835446e-05	.	.	.	.	.	.	.	.	.	.	.	.	.	.
XLOC_016797	TCONS_00033293	6.49702	7.80434942959014	2.47933084932528e-28	4.87592750617851e-26	MYB78_ARATH^MYB78_ARATH^Q:55-291,H:24-102^81.01%ID^E:2e-48^RecName: Full=Transcription factor MYB78 {ECO:0000303|PubMed:9839469};^Eukaryota; Viridiplantae; Streptophyta; Embryophyta; Tracheophyta; Spermatophyta; Magnoliophyta; eudicotyledons; Gunneridae; Pentapetalae; rosids; malvids; Brassicales; Brassicaceae; Camelineae; Arabidopsis`MYB78_ARATH^MYB78_ARATH^Q:281-613,H:112-219^44.44%ID^E:2e-48^R…	.	Gene.60636::TCONS_00033293::g.60636::m.60636	383-793[+]	.	.	.	.	.	.	.	.	.	.
XLOC_004410	TCONS_00008615	6.48486	7.23081325484536	1.55207715394759e-36	6.68612665389849e-34	.	.	.	.	.	.	.	.	.	.	.	.	.	.
XLOC_016001	TCONS_00031838	6.43316	-1.46601540805884	0.000491892756155877	0.0026060953549424	.	.	.	.	.	.	.	.	.	.	.	.	.	.
XLOC_003107	TCONS_00006143	6.40838	5.95763627162264	6.56065769931799e-37	3.04364050650668e-34	PRP4_ARATH^PRP4_ARATH^Q:172-588,H:24-155^55%ID^E:2e-34^RecName: Full=Proline-rich protein 4;^Eukaryota; Viridiplantae; Streptophyta; Embryophyta; Tracheophyta; Spermatophyta; Magnoliophyta; eudicotyledons; Gunneridae; Pentapetalae; rosids; malvids; Brassicales; Brassicaceae; Camelineae; Arabidopsis	.	Gene.12332::TCONS_00006143::g.12332::m.12332	103-1686[+]	PRP2_ARATH^PRP2_ARATH^Q:1-307,H:1-281^39.13%ID^E:1e-40^RecName: Full=Proline-rich protein 2;^Eukaryota; Viridiplantae; Streptophyta; Embryophyta; Tracheophyta; Spermatophyta; Magnoliophyta; eudicotyledons; Gunneridae; Pentapetalae; rosids; malvids; Brassicales; Brassicaceae; Camelineae; Arabidopsis	PF01190.16^Pollen_Ole_e_I^Pollen proteins Ole e I like^36-123^E:6.8e-11	sigP:1^23^0.875^YES	.	ENOG410YNJG^Proline-rich protein	KEGG:ath:AT2G21140	GO:0005618^cellular_component^cell wall`GO:0005576^cellular_component^extracellular region`GO:0009664^biological_process^plant-type cell wall organization	.	.	.
XLOC_014716	TCONS_00029197	6.37567	0.767949118055783	3.08920786675606e-07	4.36457956000937e-06	.	.	.	.	.	.	.	.	.	.	.	.	.	.
XLOC_017965	TCONS_00035562	6.35272	-1.53791030102917	0.00127802158969794	0.0057793663140227	.	.	.	.	.	.	.	.	.	.	.	.	.	.
XLOC_011974	TCONS_00023658	6.34975	8.18445521705502	6.89193150358788e-30	1.75627769992134e-27	DCE3_ARATH^DCE3_ARATH^Q:3-485,H:332-488^66.46%ID^E:3e-62^RecName: Full=Glutamate decarboxylase 3;^Eukaryota; Viridiplantae; Streptophyta; Embryophyta; Tracheophyta; Spermatophyta; Magnoliophyta; eudicotyledons; Gunneridae; Pentapetalae; rosids; malvids; Brassicales; Brassicaceae; Camelineae; Arabidopsis	.	Gene.37339::TCONS_00023658::g.37339::m.37339	3-533[+]	DCE3_ARATH^DCE3_ARATH^Q:1-161,H:332-488^66.46%ID^E:1e-66^RecName: Full=Glutamate decarboxylase 3;^Eukaryota; Viridiplantae; Streptophyta; Embryophyta; Tracheophyta; Spermatophyta; Magnoliophyta; eudicotyledons; Gunneridae; Pentapetalae; rosids; malvids; Brassicales; Brassicaceae; Camelineae; Arabidopsis	PF00282.18^Pyridoxal_deC^Pyridoxal-dependent decarboxylase conserved domain^2-50^E:1.9e-07	.	.	COG0076^decarboxylase	KEGG:ath:AT2G02000`KO:K01580	GO:0005516^molecular_function^calmodulin binding`GO:0004351^molecular_function^glutamate decarboxylase activity`GO:0030170^molecular_function^pyridoxal phosphate binding`GO:0006536^biological_process^glutamate metabolic process	GO:0016831^molecular_function^carboxy-lyase activity`GO:0030170^molecular_function^pyridoxal phosphate binding`GO:0019752^biological_process^carboxylic acid metabolic process	.	.
XLOC_009744	TCONS_00019207	6.33955	6.6734859270988	6.16729963125884e-36	2.53602164155378e-33	.	.	.	.	.	.	.	.	.	.	.	.	.	.
XLOC_015415	TCONS_00030660	6.33866	2.26605543513861	7.61945703101216e-10	1.82352957754104e-08	PRE6_ARATH^PRE6_ARATH^Q:143-367,H:19-92^78.67%ID^E:2e-31^RecName: Full=Transcription factor PRE6;^Eukaryota; Viridiplantae; Streptophyta; Embryophyta; Tracheophyta; Spermatophyta; Magnoliophyta; eudicotyledons; Gunneridae; Pentapetalae; rosids; malvids; Brassicales; Brassicaceae; Camelineae; Arabidopsis	.	.	.	.	.	.	.	ENOG410Z0M7^transcription factor bHLH135-like	KEGG:ath:AT1G26945	GO:0005737^cellular_component^cytoplasm`GO:0005634^cellular_component^nucleus`GO:0046983^molecular_function^protein dimerization activity`GO:0040008^biological_process^regulation of growth`GO:0006355^biological_process^regulation of transcription, DNA-templated`GO:0009416^biological_process^response to light stimulus`GO:0006351^biological_process^transcription, DNA-templated	.	.	.
XLOC_007482	TCONS_00014750	6.33013	4.42556683434355	8.29536759163169e-21	9.26469665650569e-19	GDL75_ARATH^GDL75_ARATH^Q:215-655,H:49-195^42.86%ID^E:2e-28^RecName: Full=GDSL esterase/lipase At5g08460;^Eukaryota; Viridiplantae; Streptophyta; Embryophyta; Tracheophyta; Spermatophyta; Magnoliophyta; eudicotyledons; Gunneridae; Pentapetalae; rosids; malvids; Brassicales; Brassicaceae; Camelineae; Arabidopsis`GDL75_ARATH^GDL75_ARATH^Q:1338-1559,H:310-382^43.24%ID^E:2e-18^RecName: Full=GDSL este…	.	Gene.22198::TCONS_00014750::g.22198::m.22198	2-928[+]	GDL75_ARATH^GDL75_ARATH^Q:55-218,H:32-195^39.63%ID^E:3e-37^RecName: Full=GDSL esterase/lipase At5g08460;^Eukaryota; Viridiplantae; Streptophyta; Embryophyta; Tracheophyta; Spermatophyta; Magnoliophyta; eudicotyledons; Gunneridae; Pentapetalae; rosids; malvids; Brassicales; Brassicaceae; Camelineae; Arabidopsis	.	sigP:1^20^0.856^YES	ExpAA=68.71^PredHel=2^Topology=o4-23i265-287o	COG3240^GDSL esterase lipase	KEGG:ath:AT5G08460	GO:0005576^cellular_component^extracellular region`GO:0016788^molecular_function^hydrolase activity, acting on ester bonds`GO:0016042^biological_process^lipid catabolic process	.	.	.
XLOC_001683	TCONS_00003289	6.3294	4.27514367141188	2.03086606877548e-22	2.60599005548616e-20	SAU32_ARATH^SAU32_ARATH^Q:175-414,H:9-91^43.37%ID^E:5e-14^RecName: Full=Auxin-responsive protein SAUR32 {ECO:0000305};^Eukaryota; Viridiplantae; Streptophyta; Embryophyta; Tracheophyta; Spermatophyta; Magnoliophyta; eudicotyledons; Gunneridae; Pentapetalae; rosids; malvids; Brassicales; Brassicaceae; Camelineae; Arabidopsis	.	Gene.2910::TCONS_00003289::g.2910::m.2910	1-570[+]	SAU32_ARATH^SAU32_ARATH^Q:59-138,H:9-91^43.37%ID^E:3e-14^RecName: Full=Auxin-responsive protein SAUR32 {ECO:0000305};^Eukaryota; Viridiplantae; Streptophyta; Embryophyta; Tracheophyta; Spermatophyta; Magnoliophyta; eudicotyledons; Gunneridae; Pentapetalae; rosids; malvids; Brassicales; Brassicaceae; Camelineae; Arabidopsis	PF02519.13^Auxin_inducible^Auxin responsive protein^62-135^E:8.4e-24	.	ExpAA=19.24^PredHel=1^Topology=i7-26o	ENOG410YXA2^Auxin-induced protein	KEGG:ath:AT2G46690`KO:K14488	GO:0005737^cellular_component^cytoplasm`GO:0005634^cellular_component^nucleus`GO:0009734^biological_process^auxin-activated signaling pathway`GO:0007275^biological_process^multicellular organism development`GO:0040008^biological_process^regulation of growth`GO:1900140^biological_process^regulation of seedling development	GO:0009733^biological_process^response to auxin	.	.
XLOC_000738	TCONS_00001446	6.31229	10.2114334894896	4.42076298256231e-19	4.16587836684895e-17	XTH23_ARATH^XTH23_ARATH^Q:31-873,H:3-285^63.29%ID^E:6e-138^RecName: Full=Probable xyloglucan endotransglucosylase/hydrolase protein 23;^Eukaryota; Viridiplantae; Streptophyta; Embryophyta; Tracheophyta; Spermatophyta; Magnoliophyta; eudicotyledons; Gunneridae; Pentapetalae; rosids; malvids; Brassicales; Brassicaceae; Camelineae; Arabidopsis	.	Gene.5192::TCONS_00001446::g.5192::m.5192	1-894[+]	XTH23_ARATH^XTH23_ARATH^Q:11-291,H:3-285^63.29%ID^E:5e-138^RecName: Full=Probable xyloglucan endotransglucosylase/hydrolase protein 23;^Eukaryota; Viridiplantae; Streptophyta; Embryophyta; Tracheophyta; Spermatophyta; Magnoliophyta; eudicotyledons; Gunneridae; Pentapetalae; rosids; malvids; Brassicales; Brassicaceae; Camelineae; Arabidopsis	PF00722.20^Glyco_hydro_16^Glycosyl hydrolases family 16^39-217^E:7.5e-61`PF06955.11^XET_C^Xyloglucan endo-transglycosylase (XET) C-terminus^245-289^E:8.5e-20	sigP:1^29^0.505^YES	ExpAA=19.34^PredHel=1^Topology=i13-30o	COG2273^hydrolase family 16	KEGG:ath:AT4G25810`KO:K08235	GO:0048046^cellular_component^apoplast`GO:0005618^cellular_component^cell wall`GO:0005794^cellular_component^Golgi apparatus`GO:0004553^molecular_function^hydrolase activity, hydrolyzing O-glycosyl compounds`GO:0016762^molecular_function^xyloglucan:xyloglucosyl transferase activity`GO:0042546^biological_process^cell wall biogenesis`GO:0071555^biological_process^cell wall organization`GO:0010411^b…	GO:0004553^molecular_function^hydrolase activity, hydrolyzing O-glycosyl compounds`GO:0005975^biological_process^carbohydrate metabolic process`GO:0016762^molecular_function^xyloglucan:xyloglucosyl transferase activity`GO:0006073^biological_process^cellular glucan metabolic process`GO:0005618^cellular_component^cell wall`GO:0048046^cellular_component^apoplast	.	.
XLOC_005889	TCONS_00011621	6.30215	-0.0312450393464604	7.54706886997814e-06	7.30209182163179e-05	.	.	Gene.23774::TCONS_00011621::g.23774::m.23774	161-997[+]	.	.	.	.	.	.	.	.	.	.
XLOC_014217	TCONS_00028235	6.29642	5.31857872479894	3.18082920412241e-21	3.737061220142e-19	1A12_CUCMA^1A12_CUCMA^Q:198-1640,H:1-475^90.44%ID^E:0^RecName: Full=1-aminocyclopropane-1-carboxylate synthase CMA101;^Eukaryota; Viridiplantae; Streptophyta; Embryophyta; Tracheophyta; Spermatophyta; Magnoliophyta; eudicotyledons; Gunneridae; Pentapetalae; rosids; fabids; Cucurbitales; Cucurbitaceae; Cucurbiteae; Cucurbita	.	Gene.53805::TCONS_00028235::g.53805::m.53805	198-1643[+]	1A12_CUCMA^1A12_CUCMA^Q:1-481,H:1-475^90.44%ID^E:0^RecName: Full=1-aminocyclopropane-1-carboxylate synthase CMA101;^Eukaryota; Viridiplantae; Streptophyta; Embryophyta; Tracheophyta; Spermatophyta; Magnoliophyta; eudicotyledons; Gunneridae; Pentapetalae; rosids; fabids; Cucurbitales; Cucurbitaceae; Cucurbiteae; Cucurbita	PF00155.20^Aminotran_1_2^Aminotransferase class I and II^41-424^E:1.1e-105	.	.	.	.	GO:0016847^molecular_function^1-aminocyclopropane-1-carboxylate synthase activity`GO:0030170^molecular_function^pyridoxal phosphate binding`GO:0009693^biological_process^ethylene biosynthetic process`GO:0009835^biological_process^fruit ripening	GO:0030170^molecular_function^pyridoxal phosphate binding`GO:0009058^biological_process^biosynthetic process	.	.
XLOC_010298	TCONS_00020356	6.25517	7.78967118535239	6.21591621768289e-20	6.50084231945298e-18	NIA_CUCMA^NIA_CUCMA^Q:1-2622,H:1-918^73.31%ID^E:0^RecName: Full=Nitrate reductase [NADH];^Eukaryota; Viridiplantae; Streptophyta; Embryophyta; Tracheophyta; Spermatophyta; Magnoliophyta; eudicotyledons; Gunneridae; Pentapetalae; rosids; fabids; Cucurbitales; Cucurbitaceae; Cucurbiteae; Cucurbita	.	Gene.34474::TCONS_00020356::g.34474::m.34474	1-2625[+]	NIA_CUCMA^NIA_CUCMA^Q:1-874,H:1-918^73.35%ID^E:0^RecName: Full=Nitrate reductase [NADH];^Eukaryota; Viridiplantae; Streptophyta; Embryophyta; Tracheophyta; Spermatophyta; Magnoliophyta; eudicotyledons; Gunneridae; Pentapetalae; rosids; fabids; Cucurbitales; Cucurbitaceae; Cucurbiteae; Cucurbita	PF00174.18^Oxidored_molyb^Oxidoreductase molybdopterin binding domain^130-309^E:4.6e-56`PF03404.15^Mo-co_dimer^Mo-co oxidoreductase dimerisation domain^338-467^E:1.2e-52`PF00173.27^Cyt-b5^Cytochrome b5-like Heme/Steroid binding domain^529-597^E:4.3e-24`PF00970.23^FAD_binding_6^Oxidoreductase FAD-binding domain^642-748^E:1e-32`PF00175.20^NAD_binding_1^Oxidoreductase NAD-binding domain^768-856^E:3.…	.	.	.	.	GO:0020037^molecular_function^heme binding`GO:0030151^molecular_function^molybdenum ion binding`GO:0043546^molecular_function^molybdopterin cofactor binding`GO:0009703^molecular_function^nitrate reductase (NADH) activity`GO:0050464^molecular_function^nitrate reductase (NADPH) activity`GO:0042128^biological_process^nitrate assimilation`GO:0006809^biological_process^nitric oxide biosynthetic process	GO:0042128^biological_process^nitrate assimilation`GO:0016491^molecular_function^oxidoreductase activity`GO:0030151^molecular_function^molybdenum ion binding`GO:0055114^biological_process^oxidation-reduction process	.	.
XLOC_007924	TCONS_00015564	6.2237	4.67041134222928	9.60210380954598e-30	2.28593242402783e-27	IQD1_ARATH^IQD1_ARATH^Q:604-1302,H:1-236^44.21%ID^E:5e-42^RecName: Full=Protein IQ-DOMAIN 1 {ECO:0000303|PubMed:15960618};^Eukaryota; Viridiplantae; Streptophyta; Embryophyta; Tracheophyta; Spermatophyta; Magnoliophyta; eudicotyledons; Gunneridae; Pentapetalae; rosids; malvids; Brassicales; Brassicaceae; Camelineae; Arabidopsis`IQD1_ARATH^IQD1_ARATH^Q:1440-1607,H:217-272^50%ID^E:3e-11^RecName: Fu…	.	Gene.25134::TCONS_00015564::g.25134::m.25134	604-1404[+]	IQD1_ARATH^IQD1_ARATH^Q:1-233,H:1-236^46.06%ID^E:3e-45^RecName: Full=Protein IQ-DOMAIN 1 {ECO:0000303|PubMed:15960618};^Eukaryota; Viridiplantae; Streptophyta; Embryophyta; Tracheophyta; Spermatophyta; Magnoliophyta; eudicotyledons; Gunneridae; Pentapetalae; rosids; malvids; Brassicales; Brassicaceae; Camelineae; Arabidopsis	PF00612.26^IQ^IQ calmodulin-binding motif^106-124^E:2.4e-06	.	.	ENOG411040N^NA	KEGG:ath:AT3G09710	GO:0005737^cellular_component^cytoplasm`GO:0005874^cellular_component^microtubule`GO:0005634^cellular_component^nucleus`GO:0005516^molecular_function^calmodulin binding`GO:0008017^molecular_function^microtubule binding	GO:0005515^molecular_function^protein binding	.	.
XLOC_017047	TCONS_00033778	6.19612	8.52264874848464	3.85834236895674e-14	1.87155465097947e-12	EXLA2_ARATH^EXLA2_ARATH^Q:542-54,H:141-264^52.15%ID^E:6e-45^RecName: Full=Expansin-like A2;^Eukaryota; Viridiplantae; Streptophyta; Embryophyta; Tracheophyta; Spermatophyta; Magnoliophyta; eudicotyledons; Gunneridae; Pentapetalae; rosids; malvids; Brassicales; Brassicaceae; Camelineae; Arabidopsis	.	Gene.56573::TCONS_00033778::g.56573::m.56573	177-542[-]	EXLA2_ARATH^EXLA2_ARATH^Q:1-119,H:141-257^61.34%ID^E:8e-44^RecName: Full=Expansin-like A2;^Eukaryota; Viridiplantae; Streptophyta; Embryophyta; Tracheophyta; Spermatophyta; Magnoliophyta; eudicotyledons; Gunneridae; Pentapetalae; rosids; malvids; Brassicales; Brassicaceae; Camelineae; Arabidopsis	PF01357.20^Pollen_allerg_1^Pollen allergen^12-93^E:1.3e-18	.	.	ENOG410YDTV^expansin-like	KEGG:ath:AT4G38400	GO:0005576^cellular_component^extracellular region`GO:0019953^biological_process^sexual reproduction	.	.	.
XLOC_005052	TCONS_00009955	6.18814	8.24764498327256	2.97835834846222e-26	5.03620912137635e-24	.	.	.	.	.	.	.	.	.	.	.	.	.	.
XLOC_013790	TCONS_00027359	6.16592	-1.66274020610205	0.00246857585238487	0.00987266642289996	GAOX2_ARATH^GAOX2_ARATH^Q:31-1119,H:19-374^49.45%ID^E:2e-126^RecName: Full=Gibberellin 20 oxidase 2;^Eukaryota; Viridiplantae; Streptophyta; Embryophyta; Tracheophyta; Spermatophyta; Magnoliophyta; eudicotyledons; Gunneridae; Pentapetalae; rosids; malvids; Brassicales; Brassicaceae; Camelineae; Arabidopsis	.	Gene.50731::TCONS_00027359::g.50731::m.50731	1-1137[+]	GAOX2_ARATH^GAOX2_ARATH^Q:11-373,H:19-374^49.45%ID^E:3e-126^RecName: Full=Gibberellin 20 oxidase 2;^Eukaryota; Viridiplantae; Streptophyta; Embryophyta; Tracheophyta; Spermatophyta; Magnoliophyta; eudicotyledons; Gunneridae; Pentapetalae; rosids; malvids; Brassicales; Brassicaceae; Camelineae; Arabidopsis	PF14226.5^DIOX_N^non-haem dioxygenase in morphine synthesis N-terminal^55-155^E:1.7e-18`PF03171.19^2OG-FeII_Oxy^2OG-Fe(II) oxygenase superfamily^222-319^E:2.4e-23	.	.	COG3491^2OGFe(II) oxygenase	KEGG:ath:AT5G51810`KO:K05282	GO:0045544^molecular_function^gibberellin 20-oxidase activity`GO:0046872^molecular_function^metal ion binding`GO:0009908^biological_process^flower development`GO:0009740^biological_process^gibberellic acid mediated signaling pathway`GO:0009686^biological_process^gibberellin biosynthetic process`GO:0009739^biological_process^response to gibberellin`GO:0080167^biological_process^response to karriki…	GO:0016491^molecular_function^oxidoreductase activity`GO:0055114^biological_process^oxidation-reduction process	.	.
XLOC_015817	TCONS_00031483	6.14466	-1.66624126519876	0.00113299386760221	0.0052414364731595	C7A12_PANGI^C7A12_PANGI^Q:205-1563,H:46-500^52.61%ID^E:4e-158^RecName: Full=Cytochrome P450 CYP736A12;^Eukaryota; Viridiplantae; Streptophyta; Embryophyta; Tracheophyta; Spermatophyta; Magnoliophyta; eudicotyledons; Gunneridae; Pentapetalae; asterids; campanulids; Apiales; Araliaceae; Panax	.	Gene.54249::TCONS_00031483::g.54249::m.54249	67-1572[+]	C7A12_PANGI^C7A12_PANGI^Q:33-499,H:32-500^53.38%ID^E:7e-177^RecName: Full=Cytochrome P450 CYP736A12;^Eukaryota; Viridiplantae; Streptophyta; Embryophyta; Tracheophyta; Spermatophyta; Magnoliophyta; eudicotyledons; Gunneridae; Pentapetalae; asterids; campanulids; Apiales; Araliaceae; Panax	PF00067.21^p450^Cytochrome P450^35-486^E:1.2e-104	.	ExpAA=26.66^PredHel=1^Topology=i2-24o	.	.	GO:0016021^cellular_component^integral component of membrane`GO:0020037^molecular_function^heme binding`GO:0005506^molecular_function^iron ion binding`GO:0004497^molecular_function^monooxygenase activity`GO:0016705^molecular_function^oxidoreductase activity, acting on paired donors, with incorporation or reduction of molecular oxygen	GO:0005506^molecular_function^iron ion binding`GO:0016705^molecular_function^oxidoreductase activity, acting on paired donors, with incorporation or reduction of molecular oxygen`GO:0020037^molecular_function^heme binding`GO:0055114^biological_process^oxidation-reduction process	.	.
XLOC_005689	TCONS_00011202	6.13572	6.42842953030172	3.83976633603983e-21	4.42502498840565e-19	.	.	.	.	.	.	.	.	.	.	.	.	.	.
XLOC_015641	TCONS_00031141	6.09835	8.53710497236133	4.31648113054836e-29	9.64173988827301e-27	WTR45_ARATH^WTR45_ARATH^Q:35-1081,H:2-351^45.63%ID^E:4e-93^RecName: Full=WAT1-related protein At5g64700;^Eukaryota; Viridiplantae; Streptophyta; Embryophyta; Tracheophyta; Spermatophyta; Magnoliophyta; eudicotyledons; Gunneridae; Pentapetalae; rosids; malvids; Brassicales; Brassicaceae; Camelineae; Arabidopsis	.	Gene.53114::TCONS_00031141::g.53114::m.53114	131-1111[+]	WTR45_ARATH^WTR45_ARATH^Q:1-317,H:34-351^45.17%ID^E:6e-84^RecName: Full=WAT1-related protein At5g64700;^Eukaryota; Viridiplantae; Streptophyta; Embryophyta; Tracheophyta; Spermatophyta; Magnoliophyta; eudicotyledons; Gunneridae; Pentapetalae; rosids; malvids; Brassicales; Brassicaceae; Camelineae; Arabidopsis	PF00892.19^EamA^EamA-like transporter family^1-105^E:1.1e-11`PF00892.19^EamA^EamA-like transporter family^150-289^E:4.4e-09	.	ExpAA=188.86^PredHel=9^Topology=o6-25i38-60o64-86i99-118o149-171i183-202o212-231i243-265o269-291i	ENOG410Y944^EamA-like transporter family	KEGG:ath:AT5G64700	GO:0016021^cellular_component^integral component of membrane`GO:0005886^cellular_component^plasma membrane`GO:0022857^molecular_function^transmembrane transporter activity`GO:0006810^biological_process^transport	GO:0016020^cellular_component^membrane`GO:0016021^cellular_component^integral component of membrane	.	.
XLOC_006027	TCONS_00011896	6.0805	2.6673620495978	5.12666531605121e-11	1.52811788407438e-09	P5CS_SOLLC^P5CS_SOLLC^Q:148-2277,H:4-713^76.2%ID^E:0^RecName: Full=Delta-1-pyrroline-5-carboxylate synthase;^Eukaryota; Viridiplantae; Streptophyta; Embryophyta; Tracheophyta; Spermatophyta; Magnoliophyta; eudicotyledons; Gunneridae; Pentapetalae; asterids; lamiids; Solanales; Solanaceae; Solanoideae; Solaneae; Solanum; Lycopersicon	.	Gene.24850::TCONS_00011896::g.24850::m.24850	148-2292[+]	P5CS1_ORYSJ^P5CS1_ORYSJ^Q:1-713,H:4-716^74.47%ID^E:0^RecName: Full=Delta-1-pyrroline-5-carboxylate synthase 1 {ECO:0000305};^Eukaryota; Viridiplantae; Streptophyta; Embryophyta; Tracheophyta; Spermatophyta; Magnoliophyta; Liliopsida; Poales; Poaceae; BOP clade; Oryzoideae; Oryzeae; Oryzinae; Oryza; Oryza sativa	PF00696.27^AA_kinase^Amino acid kinase family^13-257^E:5e-35`PF00171.21^Aldedh^Aldehyde dehydrogenase family^292-555^E:7.3e-06	.	.	COG0014^Catalyzes the NADPH dependent reduction of L-gamma- glutamyl 5-phosphate into L-glutamate 5-semialdehyde and phosphate. The product spontaneously undergoes cyclization to form 1-pyrroline-5-carboxylate (By similarity)`COG0263^Catalyzes the transfer of a phosphate group to glutamate to form glutamate 5-phosphate which rapidly cyclizes to 5- oxoproline (By similarity)	KEGG:osa:4338979`KO:K12657	GO:0005737^cellular_component^cytoplasm`GO:0005524^molecular_function^ATP binding`GO:0004349^molecular_function^glutamate 5-kinase activity`GO:0004350^molecular_function^glutamate-5-semialdehyde dehydrogenase activity`GO:0055129^biological_process^L-proline biosynthetic process`GO:0006561^biological_process^proline biosynthetic process	GO:0016491^molecular_function^oxidoreductase activity`GO:0008152^biological_process^metabolic process`GO:0055114^biological_process^oxidation-reduction process	.	.
XLOC_004635	TCONS_00009081	6.07927	0.992104716853136	2.77489919310419e-06	3.06322459431569e-05	Y3720_ARATH^Y3720_ARATH^Q:189-1556,H:46-457^27.37%ID^E:2e-35^RecName: Full=UPF0481 protein At3g47200;^Eukaryota; Viridiplantae; Streptophyta; Embryophyta; Tracheophyta; Spermatophyta; Magnoliophyta; eudicotyledons; Gunneridae; Pentapetalae; rosids; malvids; Brassicales; Brassicaceae; Camelineae; Arabidopsis	.	Gene.15255::TCONS_00009081::g.15255::m.15255	3-1568[+]	Y3720_ARATH^Y3720_ARATH^Q:63-518,H:46-457^27.74%ID^E:4e-38^RecName: Full=UPF0481 protein At3g47200;^Eukaryota; Viridiplantae; Streptophyta; Embryophyta; Tracheophyta; Spermatophyta; Magnoliophyta; eudicotyledons; Gunneridae; Pentapetalae; rosids; malvids; Brassicales; Brassicaceae; Camelineae; Arabidopsis	PF03140.14^DUF247^Plant protein of unknown function^65-507^E:3.6e-99	.	ExpAA=45.14^PredHel=1^Topology=o493-515i	.	KEGG:ath:AT3G47200	GO:0016021^cellular_component^integral component of membrane`GO:0005886^cellular_component^plasma membrane	.	.	.
XLOC_006521	TCONS_00012899	6.06349	2.84516684516084	9.50233938309698e-14	4.33062535159632e-12	SPX1_ARATH^SPX1_ARATH^Q:282-1064,H:1-232^49.43%ID^E:2e-68^RecName: Full=SPX domain-containing protein 1 {ECO:0000303|PubMed:18315545};^Eukaryota; Viridiplantae; Streptophyta; Embryophyta; Tracheophyta; Spermatophyta; Magnoliophyta; eudicotyledons; Gunneridae; Pentapetalae; rosids; malvids; Brassicales; Brassicaceae; Camelineae; Arabidopsis	.	Gene.28396::TCONS_00012899::g.28396::m.28396	282-1073[+]	SPX2_ARATH^SPX2_ARATH^Q:1-261,H:1-261^51.3%ID^E:1e-79^RecName: Full=SPX domain-containing protein 2 {ECO:0000303|PubMed:18315545};^Eukaryota; Viridiplantae; Streptophyta; Embryophyta; Tracheophyta; Spermatophyta; Magnoliophyta; eudicotyledons; Gunneridae; Pentapetalae; rosids; malvids; Brassicales; Brassicaceae; Camelineae; Arabidopsis	PF03105.18^SPX^SPX domain^1-47^E:2.3e-06`PF03105.18^SPX^SPX domain^112-157^E:1.9e-08	.	.	COG5036^Vacuolar transporter chaperone	KEGG:ath:AT2G26660	GO:0005783^cellular_component^endoplasmic reticulum`GO:0005634^cellular_component^nucleus`GO:0016036^biological_process^cellular response to phosphate starvation	.	.	.
XLOC_010741	TCONS_00021205	6.05885	8.44094043732694	1.05305163853765e-25	1.73207848146016e-23	DCE1_ARATH^DCE1_ARATH^Q:409-1308,H:146-445^85.33%ID^E:0^RecName: Full=Glutamate decarboxylase 1;^Eukaryota; Viridiplantae; Streptophyta; Embryophyta; Tracheophyta; Spermatophyta; Magnoliophyta; eudicotyledons; Gunneridae; Pentapetalae; rosids; malvids; Brassicales; Brassicaceae; Camelineae; Arabidopsis`DCE1_ARATH^DCE1_ARATH^Q:430-2,H:145-287^92.31%ID^E:6e-85^RecName: Full=Glutamate decarboxylase …	.	Gene.37343::TCONS_00021205::g.37343::m.37343	448-1512[+]	DCE4_ARATH^DCE4_ARATH^Q:2-338,H:160-486^74.78%ID^E:0^RecName: Full=Glutamate decarboxylase 4;^Eukaryota; Viridiplantae; Streptophyta; Embryophyta; Tracheophyta; Spermatophyta; Magnoliophyta; eudicotyledons; Gunneridae; Pentapetalae; rosids; malvids; Brassicales; Brassicaceae; Camelineae; Arabidopsis	PF00282.18^Pyridoxal_deC^Pyridoxal-dependent decarboxylase conserved domain^2-223^E:4.7e-65	.	.	COG0076^decarboxylase	KEGG:ath:AT2G02010`KO:K01580	GO:0005829^cellular_component^cytosol`GO:0005634^cellular_component^nucleus`GO:0005516^molecular_function^calmodulin binding`GO:0004351^molecular_function^glutamate decarboxylase activity`GO:0030170^molecular_function^pyridoxal phosphate binding`GO:0006536^biological_process^glutamate metabolic process	GO:0016831^molecular_function^carboxy-lyase activity`GO:0030170^molecular_function^pyridoxal phosphate binding`GO:0019752^biological_process^carboxylic acid metabolic process	.	.
XLOC_000901	TCONS_00001752	6.0563	-1.71328995064777	0.00197817520603583	0.00824490301838431	.	.	.	.	.	.	.	.	.	.	.	.	.	.
XLOC_006867	TCONS_00013595	6.0517	7.35054592888119	7.02083707300591e-17	4.94272393626054e-15	LGUL_ORYSJ^LGUL_ORYSJ^Q:112-954,H:7-288^41.2%ID^E:7e-71^RecName: Full=Lactoylglutathione lyase;^Eukaryota; Viridiplantae; Streptophyta; Embryophyta; Tracheophyta; Spermatophyta; Magnoliophyta; Liliopsida; Poales; Poaceae; BOP clade; Oryzoideae; Oryzeae; Oryzinae; Oryza; Oryza sativa	.	Gene.18064::TCONS_00013595::g.18064::m.18064	31-966[+]	LGUL_ORYSJ^LGUL_ORYSJ^Q:28-308,H:7-288^41.2%ID^E:4e-71^RecName: Full=Lactoylglutathione lyase;^Eukaryota; Viridiplantae; Streptophyta; Embryophyta; Tracheophyta; Spermatophyta; Magnoliophyta; Liliopsida; Poales; Poaceae; BOP clade; Oryzoideae; Oryzeae; Oryzinae; Oryza; Oryza sativa	PF00903.24^Glyoxalase^Glyoxalase/Bleomycin resistance protein/Dioxygenase superfamily^49-164^E:2.1e-06`PF00903.24^Glyoxalase^Glyoxalase/Bleomycin resistance protein/Dioxygenase superfamily^176-255^E:1.4e-05	sigP:1^27^0.88^YES	ExpAA=19.08^PredHel=1^Topology=i5-22o	COG0346^glyoxalase bleomycin resistance protein dioxygenase	KEGG:osa:4344858`KO:K01759	GO:0009941^cellular_component^chloroplast envelope`GO:0005829^cellular_component^cytosol`GO:0005777^cellular_component^peroxisome`GO:0005886^cellular_component^plasma membrane`GO:0005773^cellular_component^vacuole`GO:0019863^molecular_function^IgE binding`GO:0004462^molecular_function^lactoylglutathione lyase activity`GO:0016151^molecular_function^nickel cation binding`GO:0019243^biological_proce…	.	.	.
XLOC_016157	TCONS_00032112	6.04767	-0.330353504445998	4.87128875819678e-05	0.000367540565062779	.	.	.	.	.	.	.	.	.	.	.	.	.	.
XLOC_001637	TCONS_00003186	6.0198	9.50125165096328	2.29525172589185e-31	6.38892145793251e-29	SRO5_ARATH^SRO5_ARATH^Q:336-1145,H:41-302^48.72%ID^E:2e-77^RecName: Full=Probable inactive poly [ADP-ribose] polymerase SRO5;^Eukaryota; Viridiplantae; Streptophyta; Embryophyta; Tracheophyta; Spermatophyta; Magnoliophyta; eudicotyledons; Gunneridae; Pentapetalae; rosids; malvids; Brassicales; Brassicaceae; Camelineae; Arabidopsis	.	Gene.2506::TCONS_00003186::g.2506::m.2506	96-1262[+]	SRO5_ARATH^SRO5_ARATH^Q:81-350,H:41-302^48.72%ID^E:7e-80^RecName: Full=Probable inactive poly [ADP-ribose] polymerase SRO5;^Eukaryota; Viridiplantae; Streptophyta; Embryophyta; Tracheophyta; Spermatophyta; Magnoliophyta; eudicotyledons; Gunneridae; Pentapetalae; rosids; malvids; Brassicales; Brassicaceae; Camelineae; Arabidopsis	PF00644.19^PARP^Poly(ADP-ribose) polymerase catalytic domain^140-224^E:6.7e-07`PF12174.7^RST^RCD1-SRO-TAF4 (RST) plant domain^288-352^E:1.9e-24	.	.	ENOG4111KQX^RCD1-SRO-TAF4 (RST) plant domain	KEGG:ath:AT5G62520	GO:0005739^cellular_component^mitochondrion`GO:0016363^cellular_component^nuclear matrix`GO:0003950^molecular_function^NAD+ ADP-ribosyltransferase activity`GO:0007275^biological_process^multicellular organism development`GO:0072593^biological_process^reactive oxygen species metabolic process`GO:0009651^biological_process^response to salt stress	GO:0003950^molecular_function^NAD+ ADP-ribosyltransferase activity	.	.
XLOC_007217	TCONS_00014226	5.98929	9.86480518093135	4.72887723401047e-27	8.47124512821302e-25	7SB1_SOYBN^7SB1_SOYBN^Q:166-1335,H:47-426^36.34%ID^E:6e-72^RecName: Full=Basic 7S globulin;^Eukaryota; Viridiplantae; Streptophyta; Embryophyta; Tracheophyta; Spermatophyta; Magnoliophyta; eudicotyledons; Gunneridae; Pentapetalae; rosids; fabids; Fabales; Fabaceae; Papilionoideae; Phaseoleae; Glycine; Soja	.	Gene.20404::TCONS_00014226::g.20404::m.20404	37-1344[+]	7SB1_SOYBN^7SB1_SOYBN^Q:17-433,H:18-426^36.21%ID^E:1e-75^RecName: Full=Basic 7S globulin;^Eukaryota; Viridiplantae; Streptophyta; Embryophyta; Tracheophyta; Spermatophyta; Magnoliophyta; eudicotyledons; Gunneridae; Pentapetalae; rosids; fabids; Fabales; Fabaceae; Papilionoideae; Phaseoleae; Glycine; Soja	PF14543.5^TAXi_N^Xylanase inhibitor N-terminal^44-218^E:1.1e-42`PF14541.5^TAXi_C^Xylanase inhibitor C-terminal^258-416^E:3.1e-56	sigP:1^23^0.818^YES	ExpAA=21.37^PredHel=1^Topology=i7-26o	ENOG410XNV7^aspartic	KEGG:gmx:547908	GO:0004190^molecular_function^aspartic-type endopeptidase activity`GO:0042802^molecular_function^identical protein binding`GO:0045735^molecular_function^nutrient reservoir activity`GO:0030163^biological_process^protein catabolic process`GO:0006508^biological_process^proteolysis	.	.	.
XLOC_002789	TCONS_00005532	5.98134	8.91786388702381	8.98824491421183e-30	2.16832420310446e-27	P2B15_ARATH^P2B15_ARATH^Q:349-984,H:83-280^40.83%ID^E:2e-55^RecName: Full=F-box protein PP2-B15;^Eukaryota; Viridiplantae; Streptophyta; Embryophyta; Tracheophyta; Spermatophyta; Magnoliophyta; eudicotyledons; Gunneridae; Pentapetalae; rosids; malvids; Brassicales; Brassicaceae; Camelineae; Arabidopsis`P2B15_ARATH^P2B15_ARATH^Q:105-356,H:2-84^44.83%ID^E:2e-55^RecName: Full=F-box protein PP2-B15;^…	.	Gene.10192::TCONS_00005532::g.10192::m.10192	391-990[+]	P2B13_ARATH^P2B13_ARATH^Q:1-197,H:98-280^40.91%ID^E:1e-44^RecName: Full=F-box protein PP2-B13;^Eukaryota; Viridiplantae; Streptophyta; Embryophyta; Tracheophyta; Spermatophyta; Magnoliophyta; eudicotyledons; Gunneridae; Pentapetalae; rosids; malvids; Brassicales; Brassicaceae; Camelineae; Arabidopsis	PF14299.5^PP2^Phloem protein 2^1-197^E:2.7e-45	.	.	ENOG4111AE6^F-box protein	KEGG:ath:AT1G56240	GO:0030246^molecular_function^carbohydrate binding	.	.	.
XLOC_010052	TCONS_00019862	5.97297	9.06443615957678	8.81118608439005e-23	1.18089473944348e-20	PUB22_ARATH^PUB22_ARATH^Q:53-1312,H:1-434^50.46%ID^E:3e-129^RecName: Full=E3 ubiquitin-protein ligase PUB22 {ECO:0000303|PubMed:11495788};^Eukaryota; Viridiplantae; Streptophyta; Embryophyta; Tracheophyta; Spermatophyta; Magnoliophyta; eudicotyledons; Gunneridae; Pentapetalae; rosids; malvids; Brassicales; Brassicaceae; Camelineae; Arabidopsis	.	Gene.32778::TCONS_00019862::g.32778::m.32778	44-1318[+]	PUB22_ARATH^PUB22_ARATH^Q:4-423,H:1-434^50.46%ID^E:6e-145^RecName: Full=E3 ubiquitin-protein ligase PUB22 {ECO:0000303|PubMed:11495788};^Eukaryota; Viridiplantae; Streptophyta; Embryophyta; Tracheophyta; Spermatophyta; Magnoliophyta; eudicotyledons; Gunneridae; Pentapetalae; rosids; malvids; Brassicales; Brassicaceae; Camelineae; Arabidopsis	PF04564.14^U-box^U-box domain^11-79^E:3.6e-21	.	.	ENOG410YC1Z^e3 ubiquitin-protein ligase	KEGG:ath:AT3G52450	GO:0005829^cellular_component^cytosol`GO:0004842^molecular_function^ubiquitin-protein transferase activity`GO:0006952^biological_process^defense response`GO:0051865^biological_process^protein autoubiquitination`GO:0016567^biological_process^protein ubiquitination`GO:0010200^biological_process^response to chitin`GO:0009414^biological_process^response to water deprivation	GO:0004842^molecular_function^ubiquitin-protein transferase activity`GO:0016567^biological_process^protein ubiquitination	.	.
XLOC_002797	TCONS_00005548	5.94828	9.66278000615513	9.50339787974765e-37	4.19377994727498e-34	USPAL_ARATH^USPAL_ARATH^Q:202-642,H:30-161^29.25%ID^E:1e-10^RecName: Full=Universal stress protein A-like protein;^Eukaryota; Viridiplantae; Streptophyta; Embryophyta; Tracheophyta; Spermatophyta; Magnoliophyta; eudicotyledons; Gunneridae; Pentapetalae; rosids; malvids; Brassicales; Brassicaceae; Camelineae; Arabidopsis	.	Gene.10235::TCONS_00005548::g.10235::m.10235	133-687[+]	USPAL_ARATH^USPAL_ARATH^Q:24-178,H:30-169^29.03%ID^E:4e-13^RecName: Full=Universal stress protein A-like protein;^Eukaryota; Viridiplantae; Streptophyta; Embryophyta; Tracheophyta; Spermatophyta; Magnoliophyta; eudicotyledons; Gunneridae; Pentapetalae; rosids; malvids; Brassicales; Brassicaceae; Camelineae; Arabidopsis	PF00582.25^Usp^Universal stress protein family^9-171^E:3.2e-28	.	.	ENOG41119AN^Universal stress protein	KEGG:ath:AT3G01520	GO:0005886^cellular_component^plasma membrane`GO:0016208^molecular_function^AMP binding`GO:0006950^biological_process^response to stress	GO:0006950^biological_process^response to stress	.	.
XLOC_003744	TCONS_00007377	5.93966	6.72692654705156	1.33557130912481e-37	7.32257324121067e-35	ACCO1_ARATH^ACCO1_ARATH^Q:71-988,H:9-304^62.75%ID^E:3e-140^RecName: Full=1-aminocyclopropane-1-carboxylate oxidase 1;^Eukaryota; Viridiplantae; Streptophyta; Embryophyta; Tracheophyta; Spermatophyta; Magnoliophyta; eudicotyledons; Gunneridae; Pentapetalae; rosids; malvids; Brassicales; Brassicaceae; Camelineae; Arabidopsis	.	Gene.9014::TCONS_00007377::g.9014::m.9014	2-991[+]	ACCO1_ARATH^ACCO1_ARATH^Q:24-329,H:9-304^62.75%ID^E:3e-141^RecName: Full=1-aminocyclopropane-1-carboxylate oxidase 1;^Eukaryota; Viridiplantae; Streptophyta; Embryophyta; Tracheophyta; Spermatophyta; Magnoliophyta; eudicotyledons; Gunneridae; Pentapetalae; rosids; malvids; Brassicales; Brassicaceae; Camelineae; Arabidopsis	PF14226.5^DIOX_N^non-haem dioxygenase in morphine synthesis N-terminal^26-118^E:8.8e-14`PF03171.19^2OG-FeII_Oxy^2OG-Fe(II) oxygenase superfamily^187-281^E:8.4e-24	.	.	COG3491^2OGFe(II) oxygenase	KEGG:ath:AT2G19590`KO:K05933	GO:0009815^molecular_function^1-aminocyclopropane-1-carboxylate oxidase activity`GO:0031418^molecular_function^L-ascorbic acid binding`GO:0046872^molecular_function^metal ion binding`GO:0071398^biological_process^cellular response to fatty acid`GO:0071281^biological_process^cellular response to iron ion`GO:0071732^biological_process^cellular response to nitric oxide`GO:0051365^biological_process^…	GO:0016491^molecular_function^oxidoreductase activity`GO:0055114^biological_process^oxidation-reduction process	.	.
XLOC_010796	TCONS_00021326	5.92379	4.23427179252649	4.55903788054282e-20	4.88086818773144e-18	TRY_ARATH^TRY_ARATH^Q:240-464,H:3-77^66.67%ID^E:6e-27^RecName: Full=Transcription factor TRY;^Eukaryota; Viridiplantae; Streptophyta; Embryophyta; Tracheophyta; Spermatophyta; Magnoliophyta; eudicotyledons; Gunneridae; Pentapetalae; rosids; malvids; Brassicales; Brassicaceae; Camelineae; Arabidopsis	.	.	.	.	.	.	.	ENOG410YUWZ^Transcription factor	KEGG:ath:AT5G53200`KO:K09422	GO:0005634^cellular_component^nucleus`GO:0000981^molecular_function^RNA polymerase II transcription factor activity, sequence-specific DNA binding`GO:0043565^molecular_function^sequence-specific DNA binding`GO:0001135^molecular_function^transcription factor activity, RNA polymerase II transcription factor recruiting`GO:0003700^molecular_function^DNA binding transcription factor activity`GO:004421…	.	.	.
XLOC_000451	TCONS_00000866	5.90347	3.03451686588372	1.59206634439862e-13	7.11240898005042e-12	.	.	.	.	.	.	.	.	.	.	.	.	.	.
XLOC_017043	TCONS_00033774	5.87621	-1.84598344405385	0.00286184707227031	0.0111786267440818	SAU66_ARATH^SAU66_ARATH^Q:1-360,H:1-118^45.83%ID^E:2e-32^RecName: Full=Auxin-responsive protein SAUR66 {ECO:0000305};^Eukaryota; Viridiplantae; Streptophyta; Embryophyta; Tracheophyta; Spermatophyta; Magnoliophyta; eudicotyledons; Gunneridae; Pentapetalae; rosids; malvids; Brassicales; Brassicaceae; Camelineae; Arabidopsis	.	Gene.56562::TCONS_00033774::g.56562::m.56562	1-447[+]	SAU66_ARATH^SAU66_ARATH^Q:1-120,H:1-118^45.83%ID^E:3e-32^RecName: Full=Auxin-responsive protein SAUR66 {ECO:0000305};^Eukaryota; Viridiplantae; Streptophyta; Embryophyta; Tracheophyta; Spermatophyta; Magnoliophyta; eudicotyledons; Gunneridae; Pentapetalae; rosids; malvids; Brassicales; Brassicaceae; Camelineae; Arabidopsis	PF02519.13^Auxin_inducible^Auxin responsive protein^13-100^E:1.6e-26	.	.	ENOG410YP87^Auxin-induced protein	KEGG:ath:AT1G29500	GO:0005730^cellular_component^nucleolus`GO:0005634^cellular_component^nucleus`GO:0005886^cellular_component^plasma membrane`GO:0009926^biological_process^auxin polar transport`GO:0009734^biological_process^auxin-activated signaling pathway`GO:0007275^biological_process^multicellular organism development`GO:0046620^biological_process^regulation of organ growth	GO:0009733^biological_process^response to auxin	.	.
XLOC_004982	TCONS_00009811	5.86063	6.90332990947248	2.07735665071514e-29	4.81866844633192e-27	.	.	Gene.17785::TCONS_00009811::g.17785::m.17785	152-487[+]	.	.	.	.	.	.	.	.	.	.
XLOC_009980	TCONS_00019718	5.85709	4.9209113852155	1.39776040139165e-18	1.24579699223543e-16	GDU5_ARATH^GDU5_ARATH^Q:107-382,H:28-121^41.49%ID^E:2e-10^RecName: Full=Protein GLUTAMINE DUMPER 5;^Eukaryota; Viridiplantae; Streptophyta; Embryophyta; Tracheophyta; Spermatophyta; Magnoliophyta; eudicotyledons; Gunneridae; Pentapetalae; rosids; malvids; Brassicales; Brassicaceae; Camelineae; Arabidopsis	.	Gene.32318::TCONS_00019718::g.32318::m.32318	47-394[+]	GDU1_ARATH^GDU1_ARATH^Q:21-106,H:30-121^41.49%ID^E:1e-17^RecName: Full=Protein GLUTAMINE DUMPER 1;^Eukaryota; Viridiplantae; Streptophyta; Embryophyta; Tracheophyta; Spermatophyta; Magnoliophyta; eudicotyledons; Gunneridae; Pentapetalae; rosids; malvids; Brassicales; Brassicaceae; Camelineae; Arabidopsis	.	.	ExpAA=24.12^PredHel=1^Topology=o28-50i	ENOG410YP3Q^glutamine dumper	KEGG:ath:AT4G31730	GO:0016021^cellular_component^integral component of membrane`GO:0016020^cellular_component^membrane`GO:0005634^cellular_component^nucleus`GO:0005886^cellular_component^plasma membrane`GO:0010585^biological_process^glutamine secretion`GO:0080143^biological_process^regulation of amino acid export`GO:0006521^biological_process^regulation of cellular amino acid metabolic process	.	.	.
XLOC_001247	TCONS_00002408	5.8301	1.77389187452597	1.69138898122333e-08	3.12268375890547e-07	POLX_TOBAC^POLX_TOBAC^Q:2239-2838,H:1111-1309^38.31%ID^E:7e-35^RecName: Full=Retrovirus-related Pol polyprotein from transposon TNT 1-94;^Eukaryota; Viridiplantae; Streptophyta; Embryophyta; Tracheophyta; Spermatophyta; Magnoliophyta; eudicotyledons; Gunneridae; Pentapetalae; asterids; lamiids; Solanales; Solanaceae; Nicotianoideae; Nicotianeae; Nicotiana`POLX_TOBAC^POLX_TOBAC^Q:1976-2140,H:1015-…	.	.	.	.	.	.	.	.	.	GO:0004190^molecular_function^aspartic-type endopeptidase activity`GO:0004519^molecular_function^endonuclease activity`GO:0003676^molecular_function^nucleic acid binding`GO:0003964^molecular_function^RNA-directed DNA polymerase activity`GO:0008270^molecular_function^zinc ion binding`GO:0015074^biological_process^DNA integration	.	.	.
XLOC_016596	TCONS_00032908	5.80202	10.2480393373588	1.01211930021192e-35	4.06939433305207e-33	ADH1_TRIRP^ADH1_TRIRP^Q:269-1408,H:1-380^88.68%ID^E:0^RecName: Full=Alcohol dehydrogenase 1;^Eukaryota; Viridiplantae; Streptophyta; Embryophyta; Tracheophyta; Spermatophyta; Magnoliophyta; eudicotyledons; Gunneridae; Pentapetalae; rosids; fabids; Fabales; Fabaceae; Papilionoideae; Trifolieae; Trifolium	.	Gene.59229::TCONS_00032908::g.59229::m.59229	269-1411[+]	ADH1_TRIRP^ADH1_TRIRP^Q:1-380,H:1-380^88.68%ID^E:0^RecName: Full=Alcohol dehydrogenase 1;^Eukaryota; Viridiplantae; Streptophyta; Embryophyta; Tracheophyta; Spermatophyta; Magnoliophyta; eudicotyledons; Gunneridae; Pentapetalae; rosids; fabids; Fabales; Fabaceae; Papilionoideae; Trifolieae; Trifolium	PF08240.11^ADH_N^Alcohol dehydrogenase GroES-like domain^36-160^E:1.2e-23`PF00107.25^ADH_zinc_N^Zinc-binding dehydrogenase^206-330^E:4.7e-25	.	.	.	.	GO:0005737^cellular_component^cytoplasm`GO:0004022^molecular_function^alcohol dehydrogenase (NAD) activity`GO:0008270^molecular_function^zinc ion binding	GO:0055114^biological_process^oxidation-reduction process	.	.
XLOC_017021	TCONS_00033727	5.74808	2.75626408994001	4.79047327831209e-08	8.2389765232415e-07	BGA13_ARATH^BGA13_ARATH^Q:258-2639,H:44-842^60.6%ID^E:0^RecName: Full=Beta-galactosidase 13;^Eukaryota; Viridiplantae; Streptophyta; Embryophyta; Tracheophyta; Spermatophyta; Magnoliophyta; eudicotyledons; Gunneridae; Pentapetalae; rosids; malvids; Brassicales; Brassicaceae; Camelineae; Arabidopsis	.	Gene.56390::TCONS_00033727::g.56390::m.56390	162-2648[+]	BGA13_ARATH^BGA13_ARATH^Q:33-826,H:44-842^60.6%ID^E:0^RecName: Full=Beta-galactosidase 13;^Eukaryota; Viridiplantae; Streptophyta; Embryophyta; Tracheophyta; Spermatophyta; Magnoliophyta; eudicotyledons; Gunneridae; Pentapetalae; rosids; malvids; Brassicales; Brassicaceae; Camelineae; Arabidopsis	PF01301.18^Glyco_hydro_35^Glycosyl hydrolases family 35^39-345^E:8.3e-112`PF02449.14^Glyco_hydro_42^Beta-galactosidase^60-209^E:6.6e-11`PF13364.5^BetaGal_dom4_5^Beta-galactosidase jelly roll domain^620-695^E:4.8e-05`PF02140.17^Gal_Lectin^Galactose binding lectin domain^750-826^E:2.1e-14	sigP:1^25^0.757^YES	.	COG1874^beta-galactosidase	KEGG:ath:AT2G16730	GO:0048046^cellular_component^apoplast`GO:0005618^cellular_component^cell wall`GO:0005773^cellular_component^vacuole`GO:0004565^molecular_function^beta-galactosidase activity`GO:0030246^molecular_function^carbohydrate binding`GO:0005975^biological_process^carbohydrate metabolic process	GO:0004565^molecular_function^beta-galactosidase activity`GO:0005975^biological_process^carbohydrate metabolic process`GO:0009341^cellular_component^beta-galactosidase complex`GO:0030246^molecular_function^carbohydrate binding	.	.
XLOC_016826	TCONS_00033357	5.7355	2.35933932818338	9.27076264876879e-11	2.64151037171927e-09	.	.	.	.	.	.	.	.	.	.	.	.	.	.
XLOC_014398	TCONS_00028603	5.70556	1.11881363792556	2.25976533443758e-07	3.28929478648263e-06	DSK2_YEAST^DSK2_YEAST^Q:616-437,H:12-71^41.67%ID^E:8e-06^RecName: Full=Ubiquitin domain-containing protein DSK2;^Eukaryota; Fungi; Dikarya; Ascomycota; Saccharomycotina; Saccharomycetes; Saccharomycetales; Saccharomycetaceae; Saccharomyces	.	Gene.55163::TCONS_00028603::g.55163::m.55163	299-646[-]	NEDD8_CAEEL^NEDD8_CAEEL^Q:21-72,H:21-72^44.23%ID^E:3e-06^RecName: Full=NEDD8;^Eukaryota; Metazoa; Ecdysozoa; Nematoda; Chromadorea; Rhabditida; Rhabditoidea; Rhabditidae; Peloderinae; Caenorhabditis	PF11976.7^Rad60-SLD^Ubiquitin-2 like Rad60 SUMO-like^1-71^E:1.6e-05`PF00240.22^ubiquitin^Ubiquitin family^6-72^E:2.3e-17`PF14560.5^Ubiquitin_2^Ubiquitin-like domain^20-61^E:0.085	.	.	COG5272^ubiquitin	KEGG:cel:CELE_F45H11.2`KO:K12158	GO:0005737^cellular_component^cytoplasm`GO:0005634^cellular_component^nucleus`GO:0007275^biological_process^multicellular organism development`GO:0043066^biological_process^negative regulation of apoptotic process`GO:0043518^biological_process^negative regulation of DNA damage response, signal transduction by p53 class mediator`GO:0010629^biological_process^negative regulation of gene expression`…	GO:0005515^molecular_function^protein binding	.	.
XLOC_004577	TCONS_00008964	5.70066	-0.550855144266371	6.23334847468627e-05	0.000450759288379292	OLEO1_ORYSJ^OLEO1_ORYSJ^Q:67-387,H:32-138^48.6%ID^E:3e-22^RecName: Full=Oleosin 16 kDa;^Eukaryota; Viridiplantae; Streptophyta; Embryophyta; Tracheophyta; Spermatophyta; Magnoliophyta; Liliopsida; Poales; Poaceae; BOP clade; Oryzoideae; Oryzeae; Oryzinae; Oryza; Oryza sativa	.	Gene.14854::TCONS_00008964::g.14854::m.14854	1-408[+]	OLEO1_ORYSJ^OLEO1_ORYSJ^Q:23-129,H:32-138^48.6%ID^E:7e-25^RecName: Full=Oleosin 16 kDa;^Eukaryota; Viridiplantae; Streptophyta; Embryophyta; Tracheophyta; Spermatophyta; Magnoliophyta; Liliopsida; Poales; Poaceae; BOP clade; Oryzoideae; Oryzeae; Oryzinae; Oryza; Oryza sativa	PF01277.16^Oleosin^Oleosin^21-130^E:3e-36	.	ExpAA=59.23^PredHel=3^Topology=o20-42i49-71o76-98i	ENOG410YP7Y^May have a structural role to stabilize the lipid body during desiccation of the seed by preventing coalescence of the oil. Probably interacts with both lipid and phospholipid moieties of lipid bodies. May also provide recognition signals for specific lipase anchorage in lipolysis during seedling growth	KEGG:osa:4336570	GO:0016021^cellular_component^integral component of membrane`GO:0012511^cellular_component^monolayer-surrounded lipid storage body`GO:0019915^biological_process^lipid storage	GO:0012511^cellular_component^monolayer-surrounded lipid storage body`GO:0016021^cellular_component^integral component of membrane	.	.
XLOC_007883	TCONS_00015470	5.67843	7.75124946215619	2.32611665160536e-35	8.76800595364495e-33	.	.	Gene.24813::TCONS_00015470::g.24813::m.24813	59-493[+]	.	.	.	.	.	.	.	.	.	.
XLOC_003509	TCONS_00006936	5.66861	2.56166041230092	4.52889444139553e-11	1.36115094897291e-09	PUB34_ARATH^PUB34_ARATH^Q:1175-2077,H:417-716^55.48%ID^E:4e-103^RecName: Full=U-box domain-containing protein 34;^Eukaryota; Viridiplantae; Streptophyta; Embryophyta; Tracheophyta; Spermatophyta; Magnoliophyta; eudicotyledons; Gunneridae; Pentapetalae; rosids; malvids; Brassicales; Brassicaceae; Camelineae; Arabidopsis	.	Gene.15016::TCONS_00006936::g.15016::m.15016	869-2209[+]	PUB34_ARATH^PUB34_ARATH^Q:3-403,H:317-716^49.63%ID^E:5e-123^RecName: Full=U-box domain-containing protein 34;^Eukaryota; Viridiplantae; Streptophyta; Embryophyta; Tracheophyta; Spermatophyta; Magnoliophyta; eudicotyledons; Gunneridae; Pentapetalae; rosids; malvids; Brassicales; Brassicaceae; Camelineae; Arabidopsis	PF00069.24^Pkinase^Protein kinase domain^130-383^E:1.4e-39`PF07714.16^Pkinase_Tyr^Protein tyrosine kinase^133-387^E:1.6e-37	.	.	COG0515^Serine Threonine protein kinase	KEGG:ath:AT2G19410	GO:0005524^molecular_function^ATP binding`GO:0004674^molecular_function^protein serine/threonine kinase activity`GO:0004842^molecular_function^ubiquitin-protein transferase activity	GO:0004672^molecular_function^protein kinase activity`GO:0005524^molecular_function^ATP binding`GO:0006468^biological_process^protein phosphorylation	.	.
XLOC_001848	TCONS_00003606	5.6572	2.22831820302638	9.83890363003219e-10	2.3104054978589e-08	.	.	.	.	.	.	.	.	.	.	.	.	.	.
XLOC_009914	TCONS_00019545	5.64053	11.1429526448151	3.102039497788e-31	8.50381827779975e-29	EP1L3_ARATH^EP1L3_ARATH^Q:70-1317,H:24-434^49.76%ID^E:6e-144^RecName: Full=EP1-like glycoprotein 3 {ECO:0000303|PubMed:15276441};^Eukaryota; Viridiplantae; Streptophyta; Embryophyta; Tracheophyta; Spermatophyta; Magnoliophyta; eudicotyledons; Gunneridae; Pentapetalae; rosids; malvids; Brassicales; Brassicaceae; Camelineae; Arabidopsis	.	Gene.31727::TCONS_00019545::g.31727::m.31727	1-1323[+]	EP1L3_ARATH^EP1L3_ARATH^Q:1-439,H:1-434^48.31%ID^E:8e-147^RecName: Full=EP1-like glycoprotein 3 {ECO:0000303|PubMed:15276441};^Eukaryota; Viridiplantae; Streptophyta; Embryophyta; Tracheophyta; Spermatophyta; Magnoliophyta; eudicotyledons; Gunneridae; Pentapetalae; rosids; malvids; Brassicales; Brassicaceae; Camelineae; Arabidopsis	PF01453.23^B_lectin^D-mannose binding lectin^88-181^E:5.7e-26	sigP:1^22^0.911^YES	ExpAA=19.13^PredHel=1^Topology=i5-24o	ENOG410YGSV^Curculin-like mannose-binding lectin family protein	KEGG:ath:AT1G78850	GO:0048046^cellular_component^apoplast`GO:0005618^cellular_component^cell wall`GO:0005829^cellular_component^cytosol`GO:0005794^cellular_component^Golgi apparatus`GO:0009505^cellular_component^plant-type cell wall`GO:0005774^cellular_component^vacuolar membrane`GO:0030246^molecular_function^carbohydrate binding	.	.	.
XLOC_017450	TCONS_00034560	5.63946	10.2751304169827	1.81383945566321e-27	3.28177972713144e-25	.	.	Gene.59174::TCONS_00034560::g.59174::m.59174	404-1339[+]	EXTN3_ARATH^EXTN3_ARATH^Q:9-311,H:5-431^46.15%ID^E:5e-20^RecName: Full=Extensin-3 {ECO:0000303|PubMed:11475326};^Eukaryota; Viridiplantae; Streptophyta; Embryophyta; Tracheophyta; Spermatophyta; Magnoliophyta; eudicotyledons; Gunneridae; Pentapetalae; rosids; malvids; Brassicales; Brassicaceae; Camelineae; Arabidopsis	PF04554.12^Extensin_2^Extensin-like region^30-69^E:1.1e-06`PF04554.12^Extensin_2^Extensin-like region^191-247^E:9.5e-08`PF04554.12^Extensin_2^Extensin-like region^239-307^E:2.6e-05	sigP:1^28^0.905^YES	ExpAA=22.06^PredHel=1^Topology=i7-29o	ENOG41104BK^Extensin-like region	KEGG:ath:AT1G21310	GO:0005576^cellular_component^extracellular region`GO:0009530^cellular_component^primary cell wall`GO:0005199^molecular_function^structural constituent of cell wall`GO:0009664^biological_process^plant-type cell wall organization	GO:0005199^molecular_function^structural constituent of cell wall`GO:0009664^biological_process^plant-type cell wall organization	.	.
XLOC_005917	TCONS_00011677	5.63506	3.61274853391023	7.09746503613334e-13	2.87924741925472e-11	PGLR4_ARATH^PGLR4_ARATH^Q:345-1505,H:80-462^58.97%ID^E:3e-161^RecName: Full=Polygalacturonase At1g48100;^Eukaryota; Viridiplantae; Streptophyta; Embryophyta; Tracheophyta; Spermatophyta; Magnoliophyta; eudicotyledons; Gunneridae; Pentapetalae; rosids; malvids; Brassicales; Brassicaceae; Camelineae; Arabidopsis	.	Gene.24008::TCONS_00011677::g.24008::m.24008	93-1544[+]	PGLR4_ARATH^PGLR4_ARATH^Q:6-471,H:3-462^52.13%ID^E:5e-174^RecName: Full=Polygalacturonase At1g48100;^Eukaryota; Viridiplantae; Streptophyta; Embryophyta; Tracheophyta; Spermatophyta; Magnoliophyta; eudicotyledons; Gunneridae; Pentapetalae; rosids; malvids; Brassicales; Brassicaceae; Camelineae; Arabidopsis	PF00295.16^Glyco_hydro_28^Glycosyl hydrolases family 28^126-436^E:7e-89	.	ExpAA=25.75^PredHel=1^Topology=i7-29o	COG5434^Glycoside hydrolase family 28	KEGG:ath:AT1G48100	GO:0005618^cellular_component^cell wall`GO:0005576^cellular_component^extracellular region`GO:0004650^molecular_function^polygalacturonase activity`GO:0005975^biological_process^carbohydrate metabolic process`GO:0071555^biological_process^cell wall organization	GO:0004650^molecular_function^polygalacturonase activity`GO:0005975^biological_process^carbohydrate metabolic process	.	.
XLOC_006121	TCONS_00012062	5.63382	13.2204262827922	2.42352122388753e-35	8.82270951543441e-33	ALFC6_ARATH^ALFC6_ARATH^Q:118-1191,H:1-358^88.27%ID^E:0^RecName: Full=Fructose-bisphosphate aldolase 6, cytosolic {ECO:0000305};^Eukaryota; Viridiplantae; Streptophyta; Embryophyta; Tracheophyta; Spermatophyta; Magnoliophyta; eudicotyledons; Gunneridae; Pentapetalae; rosids; malvids; Brassicales; Brassicaceae; Camelineae; Arabidopsis	.	Gene.25494::TCONS_00012062::g.25494::m.25494	118-1194[+]	ALFC6_ARATH^ALFC6_ARATH^Q:1-358,H:1-358^88.27%ID^E:0^RecName: Full=Fructose-bisphosphate aldolase 6, cytosolic {ECO:0000305};^Eukaryota; Viridiplantae; Streptophyta; Embryophyta; Tracheophyta; Spermatophyta; Magnoliophyta; eudicotyledons; Gunneridae; Pentapetalae; rosids; malvids; Brassicales; Brassicaceae; Camelineae; Arabidopsis	PF00274.18^Glycolytic^Fructose-bisphosphate aldolase class-I^11-358^E:5.9e-172	.	.	COG3588^fructose-bisphosphate aldolase	KEGG:ath:AT2G36460`KO:K01623	GO:0005829^cellular_component^cytosol`GO:0016020^cellular_component^membrane`GO:0005739^cellular_component^mitochondrion`GO:0005634^cellular_component^nucleus`GO:0005886^cellular_component^plasma membrane`GO:0009506^cellular_component^plasmodesma`GO:0005507^molecular_function^copper ion binding`GO:0004332^molecular_function^fructose-bisphosphate aldolase activity`GO:0006094^biological_process^glu…	GO:0004332^molecular_function^fructose-bisphosphate aldolase activity`GO:0006096^biological_process^glycolytic process	.	.
XLOC_017044	TCONS_00033775	5.62049	3.52990704029096	9.44521815800896e-13	3.74763886256263e-11	EXLA1_ARATH^EXLA1_ARATH^Q:430-215,H:188-258^55.56%ID^E:3e-18^RecName: Full=Expansin-like A1;^Eukaryota; Viridiplantae; Streptophyta; Embryophyta; Tracheophyta; Spermatophyta; Magnoliophyta; eudicotyledons; Gunneridae; Pentapetalae; rosids; malvids; Brassicales; Brassicaceae; Camelineae; Arabidopsis	.	.	.	.	.	.	.	ENOG410YDTV^expansin-like	KEGG:ath:AT3G45970	GO:0005618^cellular_component^cell wall`GO:0005576^cellular_component^extracellular region`GO:0005794^cellular_component^Golgi apparatus`GO:0016021^cellular_component^integral component of membrane`GO:0009505^cellular_component^plant-type cell wall`GO:0009506^cellular_component^plasmodesma	.	.	.
XLOC_014620	TCONS_00029032	5.58856	10.2677505526853	3.18255713134441e-28	6.19161356746391e-26	P5CS_ACTDE^P5CS_ACTDE^Q:1047-2165,H:341-713^84.99%ID^E:0^RecName: Full=Delta-1-pyrroline-5-carboxylate synthase;^Eukaryota; Viridiplantae; Streptophyta; Embryophyta; Tracheophyta; Spermatophyta; Magnoliophyta; eudicotyledons; Gunneridae; Pentapetalae; asterids; Ericales; Actinidiaceae; Actinidia`P5CS_ACTDE^P5CS_ACTDE^Q:118-1053,H:1-312^83.65%ID^E:0^RecName: Full=Delta-1-pyrroline-5-carboxylate sy…	.	Gene.46102::TCONS_00029032::g.46102::m.46102	1107-2180[+]	P5CS_ACTDE^P5CS_ACTDE^Q:1-353,H:361-713^85.55%ID^E:0^RecName: Full=Delta-1-pyrroline-5-carboxylate synthase;^Eukaryota; Viridiplantae; Streptophyta; Embryophyta; Tracheophyta; Spermatophyta; Magnoliophyta; eudicotyledons; Gunneridae; Pentapetalae; asterids; Ericales; Actinidiaceae; Actinidia	.	.	.	.	.	GO:0005737^cellular_component^cytoplasm`GO:0005524^molecular_function^ATP binding`GO:0004349^molecular_function^glutamate 5-kinase activity`GO:0004350^molecular_function^glutamate-5-semialdehyde dehydrogenase activity`GO:0055129^biological_process^L-proline biosynthetic process	.	.	.
XLOC_011246	TCONS_00022220	5.57885	-2.04632309839346	0.00654420635547413	0.0220821196549037	.	.	.	.	.	.	.	.	.	.	.	.	.	.
XLOC_013823	TCONS_00027446	5.56945	-0.115876601573315	2.32554289995187e-05	0.000193186628507021	.	.	Gene.50938::TCONS_00027446::g.50938::m.50938	1-333[+]	.	PF13962.5^PGG^Domain of unknown function^35-76^E:1.2e-09	.	.	.	.	.	.	.	.
XLOC_017453	TCONS_00034570	5.48487	3.52133838517536	5.59192687847963e-14	2.65550480347328e-12	SCP42_ARATH^SCP42_ARATH^Q:501-1841,H:24-470^78.3%ID^E:0^RecName: Full=Serine carboxypeptidase-like 42;^Eukaryota; Viridiplantae; Streptophyta; Embryophyta; Tracheophyta; Spermatophyta; Magnoliophyta; eudicotyledons; Gunneridae; Pentapetalae; rosids; malvids; Brassicales; Brassicaceae; Camelineae; Arabidopsis	.	Gene.59216::TCONS_00034570::g.59216::m.59216	435-1853[+]	SCP42_ARATH^SCP42_ARATH^Q:23-472,H:24-473^77.78%ID^E:0^RecName: Full=Serine carboxypeptidase-like 42;^Eukaryota; Viridiplantae; Streptophyta; Embryophyta; Tracheophyta; Spermatophyta; Magnoliophyta; eudicotyledons; Gunneridae; Pentapetalae; rosids; malvids; Brassicales; Brassicaceae; Camelineae; Arabidopsis	PF00450.21^Peptidase_S10^Serine carboxypeptidase^36-458^E:1.1e-128	sigP:1^25^0.854^YES	.	COG2939^carboxy-peptidase	KEGG:ath:AT5G42240`KO:K16297	GO:0005618^cellular_component^cell wall`GO:0005576^cellular_component^extracellular region`GO:0004185^molecular_function^serine-type carboxypeptidase activity`GO:0051603^biological_process^proteolysis involved in cellular protein catabolic process	GO:0004185^molecular_function^serine-type carboxypeptidase activity`GO:0006508^biological_process^proteolysis	.	.
XLOC_013761	TCONS_00027308	5.47413	1.48760061917704	7.17473930691152e-07	9.24590870939816e-06	DTX55_ARATH^DTX55_ARATH^Q:2-1438,H:1-484^63.17%ID^E:0^RecName: Full=Protein DETOXIFICATION 55 {ECO:0000303|PubMed:11739388};^Eukaryota; Viridiplantae; Streptophyta; Embryophyta; Tracheophyta; Spermatophyta; Magnoliophyta; eudicotyledons; Gunneridae; Pentapetalae; rosids; malvids; Brassicales; Brassicaceae; Camelineae; Arabidopsis	.	Gene.50545::TCONS_00027308::g.50545::m.50545	2-1534[+]	DTX55_ARATH^DTX55_ARATH^Q:1-479,H:1-484^63.52%ID^E:0^RecName: Full=Protein DETOXIFICATION 55 {ECO:0000303|PubMed:11739388};^Eukaryota; Viridiplantae; Streptophyta; Embryophyta; Tracheophyta; Spermatophyta; Magnoliophyta; eudicotyledons; Gunneridae; Pentapetalae; rosids; malvids; Brassicales; Brassicaceae; Camelineae; Arabidopsis	PF01554.17^MatE^MatE^29-187^E:2.2e-27`PF01554.17^MatE^MatE^266-428^E:9.5e-35	.	ExpAA=221.24^PredHel=9^Topology=o27-49i56-78o98-120i170-192o202-224i337-359o374-391i412-434o439-461i	COG0534^Mate efflux family protein	KEGG:ath:AT5G49130`KO:K03327	GO:0016021^cellular_component^integral component of membrane`GO:0015297^molecular_function^antiporter activity`GO:0015238^molecular_function^drug transmembrane transporter activity`GO:0006855^biological_process^drug transmembrane transport	GO:0015238^molecular_function^drug transmembrane transporter activity`GO:0015297^molecular_function^antiporter activity`GO:0006855^biological_process^drug transmembrane transport`GO:0055085^biological_process^transmembrane transport`GO:0016020^cellular_component^membrane	.	.
XLOC_011201	TCONS_00022131	5.45803	5.51697694883297	5.88915164302534e-25	9.02986615908962e-23	YG31B_YEAST^YG31B_YEAST^Q:2164-2373,H:664-733^50%ID^E:2e-21^RecName: Full=Transposon Ty3-G Gag-Pol polyprotein;^Eukaryota; Fungi; Dikarya; Ascomycota; Saccharomycotina; Saccharomycetes; Saccharomycetales; Saccharomycetaceae; Saccharomyces`YG31B_YEAST^YG31B_YEAST^Q:2048-2158,H:625-661^48.65%ID^E:2e-21^RecName: Full=Transposon Ty3-G Gag-Pol polyprotein;^Eukaryota; Fungi; Dikarya; Ascomycota; Saccha…	.	Gene.40387::TCONS_00022131::g.40387::m.40387	763-1218[+]	.	PF03732.16^Retrotrans_gag^Retrotransposon gag protein^1-64^E:1.6e-10	.	.	.	.	.	.	.	.
XLOC_008789	TCONS_00017291	5.44962	-2.1060963166043	0.0056337770566286	0.0195646695365799	.	.	.	.	.	.	.	.	.	.	.	.	.	.
XLOC_014406	TCONS_00028618	5.41652	4.78831726662096	3.45369866470222e-20	3.7417826311651e-18	BBX32_ARATH^BBX32_ARATH^Q:15-203,H:1-63^42.86%ID^E:2e-10^RecName: Full=B-box zinc finger protein 32 {ECO:0000303|PubMed:19920209};^Eukaryota; Viridiplantae; Streptophyta; Embryophyta; Tracheophyta; Spermatophyta; Magnoliophyta; eudicotyledons; Gunneridae; Pentapetalae; rosids; malvids; Brassicales; Brassicaceae; Camelineae; Arabidopsis	.	Gene.55228::TCONS_00028618::g.55228::m.55228	3-386[+]	BBX32_ARATH^BBX32_ARATH^Q:5-67,H:1-63^42.86%ID^E:4e-11^RecName: Full=B-box zinc finger protein 32 {ECO:0000303|PubMed:19920209};^Eukaryota; Viridiplantae; Streptophyta; Embryophyta; Tracheophyta; Spermatophyta; Magnoliophyta; eudicotyledons; Gunneridae; Pentapetalae; rosids; malvids; Brassicales; Brassicaceae; Camelineae; Arabidopsis	.	sigP:1^20^0.454^YES	.	ENOG410YSB4^zinc finger	KEGG:ath:AT3G21150	GO:0005737^cellular_component^cytoplasm`GO:0005634^cellular_component^nucleus`GO:0003700^molecular_function^DNA binding transcription factor activity`GO:0008270^molecular_function^zinc ion binding`GO:0009785^biological_process^blue light signaling pathway`GO:0045892^biological_process^negative regulation of transcription, DNA-templated`GO:0009640^biological_process^photomorphogenesis`GO:0010017^b…	.	.	.
XLOC_000639	TCONS_00001264	5.4106	-0.224428952179266	7.35151742903148e-06	7.12813530779564e-05	.	.	.	.	.	.	.	.	.	.	.	.	.	.
XLOC_001666	TCONS_00003263	5.3898	6.28645946368783	1.9356786497456e-18	1.68376124085804e-16	.	.	.	.	.	.	.	.	.	.	.	.	.	.
XLOC_004067	TCONS_00008001	5.37938	2.62021634758909	6.99497651714923e-09	1.38468391821423e-07	.	.	.	.	.	.	.	.	.	.	.	.	.	.
XLOC_012371	TCONS_00024396	5.3744	1.68147408862439	6.64297565190435e-07	8.63443667168861e-06	.	.	Gene.39874::TCONS_00024396::g.39874::m.39874	1-441[+]	.	.	.	.	.	.	.	.	.	.
XLOC_005918	TCONS_00011679	5.37277	2.169185934227	4.62669146907499e-09	9.48026373159386e-08	.	.	Gene.24014::TCONS_00011679::g.24014::m.24014	86-499[+]	.	.	.	.	.	.	.	.	.	.
XLOC_009485	TCONS_00018668	5.36111	6.53306745532238	2.20612432064723e-21	2.64340445917022e-19	C3H20_ARATH^C3H20_ARATH^Q:379-693,H:240-359^45.83%ID^E:2e-18^RecName: Full=Zinc finger CCCH domain-containing protein 20;^Eukaryota; Viridiplantae; Streptophyta; Embryophyta; Tracheophyta; Spermatophyta; Magnoliophyta; eudicotyledons; Gunneridae; Pentapetalae; rosids; malvids; Brassicales; Brassicaceae; Camelineae; Arabidopsis	.	Gene.36118::TCONS_00018668::g.36118::m.36118	1-696[+]	C3H49_ARATH^C3H49_ARATH^Q:44-231,H:162-356^38.39%ID^E:1e-18^RecName: Full=Zinc finger CCCH domain-containing protein 49;^Eukaryota; Viridiplantae; Streptophyta; Embryophyta; Tracheophyta; Spermatophyta; Magnoliophyta; eudicotyledons; Gunneridae; Pentapetalae; rosids; malvids; Brassicales; Brassicaceae; Camelineae; Arabidopsis	.	.	.	ENOG410XR0Z^zinc finger CCCH domain-containing protein	KEGG:ath:AT4G29190	GO:0005886^cellular_component^plasma membrane`GO:0003677^molecular_function^DNA binding`GO:0046872^molecular_function^metal ion binding`GO:0003700^molecular_function^DNA binding transcription factor activity`GO:0006355^biological_process^regulation of transcription, DNA-templated	.	.	.
XLOC_015710	TCONS_00031276	5.34196	4.43003581599442	3.05839225751225e-23	4.22408329123428e-21	.	.	Gene.53551::TCONS_00031276::g.53551::m.53551	1-303[+]	.	.	.	ExpAA=21.95^PredHel=1^Topology=i7-29o	.	.	.	.	.	.
XLOC_010400	TCONS_00020581	5.32991	5.70523672308308	6.80651185461536e-21	7.64908192456868e-19	PNS1_GIBZE^PNS1_GIBZE^Q:1236-1871,H:287-511^22.67%ID^E:6e-07^RecName: Full=Protein PNS1;^Eukaryota; Fungi; Dikarya; Ascomycota; Pezizomycotina; Sordariomycetes; Hypocreomycetidae; Hypocreales; Nectriaceae; Fusarium	.	Gene.35103::TCONS_00020581::g.35103::m.35103	480-2012[+]	PNS1_ASPFU^PNS1_ASPFU^Q:156-488,H:169-535^20.94%ID^E:6e-09^RecName: Full=Protein pns1;^Eukaryota; Fungi; Dikarya; Ascomycota; Pezizomycotina; Eurotiomycetes; Eurotiomycetidae; Eurotiales; Aspergillaceae; Aspergillus	PF04515.11^Choline_transpo^Plasma-membrane choline transporter^178-463^E:1.1e-30	.	ExpAA=178.99^PredHel=8^Topology=i83-105o120-142i149-168o173-195i216-238o248-267i397-419o429-446i	.	KEGG:afm:AFUA_3G12970	GO:0016021^cellular_component^integral component of membrane`GO:0005886^cellular_component^plasma membrane`GO:0006810^biological_process^transport	.	.	.
XLOC_017754	TCONS_00035161	5.32803	-2.1660993614056	0.00966942571296329	0.0301740116289487	BCB1_ARATH^BCB1_ARATH^Q:164-505,H:28-145^50.42%ID^E:1e-26^RecName: Full=Blue copper protein;^Eukaryota; Viridiplantae; Streptophyta; Embryophyta; Tracheophyta; Spermatophyta; Magnoliophyta; eudicotyledons; Gunneridae; Pentapetalae; rosids; malvids; Brassicales; Brassicaceae; Camelineae; Arabidopsis	.	Gene.61249::TCONS_00035161::g.61249::m.61249	80-754[+]	CPC_CUCSA^CPC_CUCSA^Q:25-125,H:4-105^49.02%ID^E:2e-29^RecName: Full=Cucumber peeling cupredoxin;^Eukaryota; Viridiplantae; Streptophyta; Embryophyta; Tracheophyta; Spermatophyta; Magnoliophyta; eudicotyledons; Gunneridae; Pentapetalae; rosids; fabids; Cucurbitales; Cucurbitaceae; Benincaseae; Cucumis	PF02298.16^Cu_bind_like^Plastocyanin-like domain^34-119^E:3.3e-23	sigP:1^22^0.895^YES	.	.	.	GO:0009055^molecular_function^electron transfer activity`GO:0046872^molecular_function^metal ion binding`GO:0055114^biological_process^oxidation-reduction process	GO:0009055^molecular_function^electron transfer activity	.	.
XLOC_000954	TCONS_00001836	5.32161	-0.93738668093266	0.000317456116362514	0.00180646418755193	E13B_PRUPE^E13B_PRUPE^Q:175-1119,H:37-350^62.78%ID^E:2e-125^RecName: Full=Glucan endo-1,3-beta-glucosidase, basic isoform;^Eukaryota; Viridiplantae; Streptophyta; Embryophyta; Tracheophyta; Spermatophyta; Magnoliophyta; eudicotyledons; Gunneridae; Pentapetalae; rosids; fabids; Rosales; Rosaceae; Maloideae; Amygdaleae; Prunus	.	Gene.6530::TCONS_00001836::g.6530::m.6530	82-1122[+]	E13B_PRUPE^E13B_PRUPE^Q:25-346,H:30-350^62.35%ID^E:3e-143^RecName: Full=Glucan endo-1,3-beta-glucosidase, basic isoform;^Eukaryota; Viridiplantae; Streptophyta; Embryophyta; Tracheophyta; Spermatophyta; Magnoliophyta; eudicotyledons; Gunneridae; Pentapetalae; rosids; fabids; Rosales; Rosaceae; Maloideae; Amygdaleae; Prunus	PF00332.17^Glyco_hydro_17^Glycosyl hydrolases family 17^35-345^E:1.1e-122	sigP:1^33^0.772^YES	.	.	KEGG:pper:18771149	GO:0042973^molecular_function^glucan endo-1,3-beta-D-glucosidase activity`GO:0005975^biological_process^carbohydrate metabolic process`GO:0006952^biological_process^defense response`GO:0009607^biological_process^response to biotic stimulus	GO:0004553^molecular_function^hydrolase activity, hydrolyzing O-glycosyl compounds`GO:0005975^biological_process^carbohydrate metabolic process	.	.
XLOC_012053	TCONS_00023808	5.3131	3.08908284910075	2.28450190880047e-12	8.46997808113257e-11	ATL79_ARATH^ATL79_ARATH^Q:133-579,H:17-153^48.32%ID^E:2e-27^RecName: Full=RING-H2 finger protein ATL79;^Eukaryota; Viridiplantae; Streptophyta; Embryophyta; Tracheophyta; Spermatophyta; Magnoliophyta; eudicotyledons; Gunneridae; Pentapetalae; rosids; malvids; Brassicales; Brassicaceae; Camelineae; Arabidopsis	.	.	.	.	.	.	.	ENOG41121N2^zinc ion binding	KEGG:ath:AT5G47610	GO:0016021^cellular_component^integral component of membrane`GO:0046872^molecular_function^metal ion binding`GO:0061630^molecular_function^ubiquitin protein ligase activity`GO:0043161^biological_process^proteasome-mediated ubiquitin-dependent protein catabolic process	.	.	.
XLOC_014317	TCONS_00028437	5.29208	8.20229908119361	4.9574057818273e-34	1.60168469304645e-31	STR18_ARATH^STR18_ARATH^Q:443-799,H:14-132^50.42%ID^E:3e-37^RecName: Full=Thiosulfate sulfurtransferase 18;^Eukaryota; Viridiplantae; Streptophyta; Embryophyta; Tracheophyta; Spermatophyta; Magnoliophyta; eudicotyledons; Gunneridae; Pentapetalae; rosids; malvids; Brassicales; Brassicaceae; Camelineae; Arabidopsis	.	Gene.54607::TCONS_00028437::g.54607::m.54607	134-850[+]	STR18_ARATH^STR18_ARATH^Q:104-216,H:14-126^52.21%ID^E:2e-38^RecName: Full=Thiosulfate sulfurtransferase 18;^Eukaryota; Viridiplantae; Streptophyta; Embryophyta; Tracheophyta; Spermatophyta; Magnoliophyta; eudicotyledons; Gunneridae; Pentapetalae; rosids; malvids; Brassicales; Brassicaceae; Camelineae; Arabidopsis	PF00581.19^Rhodanese^Rhodanese-like domain^112-210^E:3.4e-06	.	.	COG0607^Rhodanese domain protein	KEGG:ath:AT5G66170	GO:0005737^cellular_component^cytoplasm`GO:0004792^molecular_function^thiosulfate sulfurtransferase activity	.	.	.
XLOC_017048	TCONS_00033779	5.28613	5.47880937645885	2.58934606833691e-12	9.52216227935361e-11	EXLA1_ARATH^EXLA1_ARATH^Q:846-631,H:190-260^48.61%ID^E:1e-15^RecName: Full=Expansin-like A1;^Eukaryota; Viridiplantae; Streptophyta; Embryophyta; Tracheophyta; Spermatophyta; Magnoliophyta; eudicotyledons; Gunneridae; Pentapetalae; rosids; malvids; Brassicales; Brassicaceae; Camelineae; Arabidopsis	.	.	.	.	.	.	.	ENOG410YDTV^expansin-like	KEGG:ath:AT3G45970	GO:0005618^cellular_component^cell wall`GO:0005576^cellular_component^extracellular region`GO:0005794^cellular_component^Golgi apparatus`GO:0016021^cellular_component^integral component of membrane`GO:0009505^cellular_component^plant-type cell wall`GO:0009506^cellular_component^plasmodesma	.	.	.
XLOC_016430	TCONS_00032580	5.28174	8.06759101795573	1.0538869086512e-07	1.67262945949352e-06	JGB_ARATH^JGB_ARATH^Q:1653-343,H:10-421^57.37%ID^E:2e-172^RecName: Full=Protein JINGUBANG {ECO:0000303|PubMed:27468890};^Eukaryota; Viridiplantae; Streptophyta; Embryophyta; Tracheophyta; Spermatophyta; Magnoliophyta; eudicotyledons; Gunneridae; Pentapetalae; rosids; malvids; Brassicales; Brassicaceae; Camelineae; Arabidopsis	.	Gene.58050::TCONS_00032580::g.58050::m.58050	208-1689[-]	JGB_ARATH^JGB_ARATH^Q:13-449,H:10-421^58.05%ID^E:1e-178^RecName: Full=Protein JINGUBANG {ECO:0000303|PubMed:27468890};^Eukaryota; Viridiplantae; Streptophyta; Embryophyta; Tracheophyta; Spermatophyta; Magnoliophyta; eudicotyledons; Gunneridae; Pentapetalae; rosids; malvids; Brassicales; Brassicaceae; Camelineae; Arabidopsis	PF00400.31^WD40^WD domain, G-beta repeat^107-133^E:0.19`PF00400.31^WD40^WD domain, G-beta repeat^132-171^E:0.024`PF00400.31^WD40^WD domain, G-beta repeat^216-244^E:0.29`PF00400.31^WD40^WD domain, G-beta repeat^250-285^E:0.00083`PF00400.31^WD40^WD domain, G-beta repeat^343-374^E:0.012`PF00400.31^WD40^WD domain, G-beta repeat^384-444^E:0.00069	.	.	COG2319^wd repeat	KEGG:ath:AT2G26490	GO:0005737^cellular_component^cytoplasm`GO:0005634^cellular_component^nucleus`GO:0009846^biological_process^pollen germination	GO:0005515^molecular_function^protein binding	.	.
XLOC_003208	TCONS_00006325	5.26765	3.01879800437265	1.92170438756165e-11	6.24203245214386e-10	ATESY_VITVI^ATESY_VITVI^Q:327-1208,H:73-364^57.82%ID^E:4e-113^RecName: Full=(-)-alpha-terpineol synthase;^Eukaryota; Viridiplantae; Streptophyta; Embryophyta; Tracheophyta; Spermatophyta; Magnoliophyta; eudicotyledons; Gunneridae; Pentapetalae; rosids; Vitales; Vitaceae; Vitis`ATESY_VITVI^ATESY_VITVI^Q:1767-2534,H:360-585^54.47%ID^E:6e-89^RecName: Full=(-)-alpha-terpineol synthase;^Eukaryota; Vir…	.	Gene.12848::TCONS_00006325::g.12848::m.12848	309-1199[+]	ATESY_VITVI^ATESY_VITVI^Q:7-296,H:73-360^57.93%ID^E:1e-120^RecName: Full=(-)-alpha-terpineol synthase;^Eukaryota; Viridiplantae; Streptophyta; Embryophyta; Tracheophyta; Spermatophyta; Magnoliophyta; eudicotyledons; Gunneridae; Pentapetalae; rosids; Vitales; Vitaceae; Vitis	PF01397.20^Terpene_synth^Terpene synthase, N-terminal domain^10-169^E:3.3e-47`PF03936.15^Terpene_synth_C^Terpene synthase family, metal binding domain^200-296^E:2.4e-39	.	.	.	KEGG:vvi:100232956`KO:K18108	GO:0000287^molecular_function^magnesium ion binding`GO:0010333^molecular_function^terpene synthase activity`GO:0016114^biological_process^terpenoid biosynthetic process	GO:0010333^molecular_function^terpene synthase activity`GO:0016829^molecular_function^lyase activity`GO:0008152^biological_process^metabolic process`GO:0000287^molecular_function^magnesium ion binding	.	.
XLOC_013159	TCONS_00026096	5.25136	-2.22258845571942	0.0127946423786028	0.0376902417056433	HSP11_SOYBN^HSP11_SOYBN^Q:1-456,H:1-153^68.63%ID^E:2e-69^RecName: Full=17.3 kDa class I heat shock protein;^Eukaryota; Viridiplantae; Streptophyta; Embryophyta; Tracheophyta; Spermatophyta; Magnoliophyta; eudicotyledons; Gunneridae; Pentapetalae; rosids; fabids; Fabales; Fabaceae; Papilionoideae; Phaseoleae; Glycine; Soja	.	Gene.46153::TCONS_00026096::g.46153::m.46153	1-459[+]	HSP11_SOYBN^HSP11_SOYBN^Q:1-152,H:1-153^68.63%ID^E:6e-77^RecName: Full=17.3 kDa class I heat shock protein;^Eukaryota; Viridiplantae; Streptophyta; Embryophyta; Tracheophyta; Spermatophyta; Magnoliophyta; eudicotyledons; Gunneridae; Pentapetalae; rosids; fabids; Fabales; Fabaceae; Papilionoideae; Phaseoleae; Glycine; Soja	PF00011.20^HSP20^Hsp20/alpha crystallin family^48-150^E:1.1e-30	.	.	COG0071^response to heat	KEGG:gmx:100526870`KO:K13993	GO:0005737^cellular_component^cytoplasm	.	.	.
XLOC_011976	TCONS_00023662	5.24222	1.45517843478035	4.7546942068417e-07	6.36763007286357e-06	.	.	.	.	.	.	.	.	.	.	.	.	.	.
XLOC_010472	TCONS_00020708	5.24089	-2.22367875503126	0.0115521695561241	0.0347371453845693	.	.	.	.	.	.	.	.	.	.	.	.	.	.
XLOC_013491	TCONS_00026767	5.2318	5.09420990467679	1.04709385656978e-21	1.28007223965656e-19	GH35_ARATH^GH35_ARATH^Q:1011-2489,H:106-600^54.85%ID^E:0^RecName: Full=Indole-3-acetic acid-amido synthetase GH3.5;^Eukaryota; Viridiplantae; Streptophyta; Embryophyta; Tracheophyta; Spermatophyta; Magnoliophyta; eudicotyledons; Gunneridae; Pentapetalae; rosids; malvids; Brassicales; Brassicaceae; Camelineae; Arabidopsis`GH35_ARATH^GH35_ARATH^Q:140-412,H:17-107^53.85%ID^E:1e-21^RecName: Full=Indo…	.	Gene.48657::TCONS_00026767::g.48657::m.48657	1059-2513[+]	GH35_ARATH^GH35_ARATH^Q:3-477,H:124-600^54.41%ID^E:2e-178^RecName: Full=Indole-3-acetic acid-amido synthetase GH3.5;^Eukaryota; Viridiplantae; Streptophyta; Embryophyta; Tracheophyta; Spermatophyta; Magnoliophyta; eudicotyledons; Gunneridae; Pentapetalae; rosids; malvids; Brassicales; Brassicaceae; Camelineae; Arabidopsis	PF03321.12^GH3^GH3 auxin-responsive promoter^4-455^E:6.3e-148	.	.	ENOG410XT6V^Indole-3-acetic acid-amido synthetase	KEGG:ath:AT4G27260`KO:K14487	GO:0010279^molecular_function^indole-3-acetic acid amido synthetase activity`GO:0010252^biological_process^auxin homeostasis`GO:0010120^biological_process^camalexin biosynthetic process`GO:1901183^biological_process^positive regulation of camalexin biosynthetic process`GO:0009733^biological_process^response to auxin	.	.	.
XLOC_017870	TCONS_00035376	5.22972	5.17403262955075	1.51857119181623e-24	2.27070318789512e-22	IOS1_ARATH^IOS1_ARATH^Q:4-2472,H:57-894^48.35%ID^E:0^RecName: Full=LRR receptor-like serine/threonine-protein kinase IOS1 {ECO:0000303|PubMed:21711359};^Eukaryota; Viridiplantae; Streptophyta; Embryophyta; Tracheophyta; Spermatophyta; Magnoliophyta; eudicotyledons; Gunneridae; Pentapetalae; rosids; malvids; Brassicales; Brassicaceae; Camelineae; Arabidopsis	.	Gene.62032::TCONS_00035376::g.62032::m.62032	1-2475[+]	IOS1_ARATH^IOS1_ARATH^Q:2-824,H:57-894^48.35%ID^E:0^RecName: Full=LRR receptor-like serine/threonine-protein kinase IOS1 {ECO:0000303|PubMed:21711359};^Eukaryota; Viridiplantae; Streptophyta; Embryophyta; Tracheophyta; Spermatophyta; Magnoliophyta; eudicotyledons; Gunneridae; Pentapetalae; rosids; malvids; Brassicales; Brassicaceae; Camelineae; Arabidopsis	PF12819.6^Malectin_like^Carbohydrate-binding protein of the ER^2-301^E:1.5e-97`PF07714.16^Pkinase_Tyr^Protein tyrosine kinase^517-783^E:5.9e-48`PF00069.24^Pkinase^Protein kinase domain^518-781^E:7.9e-44	.	ExpAA=31.56^PredHel=1^Topology=o461-483i	COG0515^Serine Threonine protein kinase	KEGG:ath:AT1G51800	GO:0016021^cellular_component^integral component of membrane`GO:0005886^cellular_component^plasma membrane`GO:0090406^cellular_component^pollen tube`GO:0005524^molecular_function^ATP binding`GO:0042803^molecular_function^protein homodimerization activity`GO:0004674^molecular_function^protein serine/threonine kinase activity`GO:0009738^biological_process^abscisic acid-activated signaling pathway`G…	GO:0004672^molecular_function^protein kinase activity`GO:0006468^biological_process^protein phosphorylation`GO:0005524^molecular_function^ATP binding	.	.
XLOC_011093	TCONS_00021873	5.22887	-2.22497801558871	0.011390329960647	0.0343761868186798	.	.	.	.	.	.	.	.	.	.	.	.	.	.
XLOC_001186	TCONS_00002286	5.22851	3.00074461588264	3.91969135497508e-09	8.17761198885177e-08	EXLA3_ORYSJ^EXLA3_ORYSJ^Q:306-148,H:98-150^41.51%ID^E:1e-07^RecName: Full=Expansin-like A3;^Eukaryota; Viridiplantae; Streptophyta; Embryophyta; Tracheophyta; Spermatophyta; Magnoliophyta; Liliopsida; Poales; Poaceae; BOP clade; Oryzoideae; Oryzeae; Oryzinae; Oryza; Oryza sativa	.	.	.	.	.	.	.	ENOG41107YX^Pollen allergen	KEGG:osa:4343213	GO:0005576^cellular_component^extracellular region	.	.	.
XLOC_007121	TCONS_00014080	5.20421	1.41608879271398	8.32412776721502e-07	1.05246990700364e-05	MYO6_ARATH^MYO6_ARATH^Q:96-425,H:1396-1505^74.55%ID^E:7e-35^RecName: Full=Myosin-6;^Eukaryota; Viridiplantae; Streptophyta; Embryophyta; Tracheophyta; Spermatophyta; Magnoliophyta; eudicotyledons; Gunneridae; Pentapetalae; rosids; malvids; Brassicales; Brassicaceae; Camelineae; Arabidopsis	.	.	.	.	.	.	.	COG5022^myosin heavy chain	KEGG:ath:AT5G43900	GO:0005737^cellular_component^cytoplasm`GO:0016459^cellular_component^myosin complex`GO:0003779^molecular_function^actin binding`GO:0005524^molecular_function^ATP binding`GO:0005516^molecular_function^calmodulin binding`GO:0003774^molecular_function^motor activity	.	.	.
XLOC_010529	TCONS_00020822	5.17948	1.90655774716049	9.44583806382763e-08	1.51914264967852e-06	LIP_THELA^LIP_THELA^Q:594-1094,H:99-237^31.14%ID^E:9e-12^RecName: Full=Lipase;^Eukaryota; Fungi; Dikarya; Ascomycota; Pezizomycotina; Eurotiomycetes; Eurotiomycetidae; Eurotiales; Trichocomaceae; Thermomyces	.	Gene.35913::TCONS_00020822::g.35913::m.35913	1-579[+]	.	.	.	ExpAA=42.12^PredHel=2^Topology=i61-80o85-107i	.	.	.	.	.	.
XLOC_013975	TCONS_00027766	5.15999	6.96388283387911	2.92181111283271e-18	2.47029572263935e-16	FAF3_ARATH^FAF3_ARATH^Q:323-661,H:107-219^42.11%ID^E:6e-20^RecName: Full=Protein FANTASTIC FOUR 3;^Eukaryota; Viridiplantae; Streptophyta; Embryophyta; Tracheophyta; Spermatophyta; Magnoliophyta; eudicotyledons; Gunneridae; Pentapetalae; rosids; malvids; Brassicales; Brassicaceae; Camelineae; Arabidopsis	.	Gene.52060::TCONS_00027766::g.52060::m.52060	26-799[+]	FAF3_ARATH^FAF3_ARATH^Q:100-212,H:107-219^45.61%ID^E:2e-21^RecName: Full=Protein FANTASTIC FOUR 3;^Eukaryota; Viridiplantae; Streptophyta; Embryophyta; Tracheophyta; Spermatophyta; Magnoliophyta; eudicotyledons; Gunneridae; Pentapetalae; rosids; malvids; Brassicales; Brassicaceae; Camelineae; Arabidopsis	PF11250.7^FAF^Fantastic Four meristem regulator^158-210^E:2.9e-18	.	.	ENOG41114KZ^Protein of unknown function (DUF3049)	KEGG:ath:AT5G19260	.	.	.	.
XLOC_013353	TCONS_00026519	5.15403	11.1848841506612	1.25881882423425e-28	2.6179090789506e-26	SCRK4_ARATH^SCRK4_ARATH^Q:154-1143,H:1-326^78.79%ID^E:0^RecName: Full=Probable fructokinase-4;^Eukaryota; Viridiplantae; Streptophyta; Embryophyta; Tracheophyta; Spermatophyta; Magnoliophyta; eudicotyledons; Gunneridae; Pentapetalae; rosids; malvids; Brassicales; Brassicaceae; Camelineae; Arabidopsis	.	Gene.47669::TCONS_00026519::g.47669::m.47669	154-1149[+]	SCRK4_ARATH^SCRK4_ARATH^Q:1-330,H:1-326^78.79%ID^E:0^RecName: Full=Probable fructokinase-4;^Eukaryota; Viridiplantae; Streptophyta; Embryophyta; Tracheophyta; Spermatophyta; Magnoliophyta; eudicotyledons; Gunneridae; Pentapetalae; rosids; malvids; Brassicales; Brassicaceae; Camelineae; Arabidopsis	PF00294.23^PfkB^pfkB family carbohydrate kinase^14-318^E:3.9e-83	.	.	COG0524^pfkb domain protein	KEGG:ath:AT3G59480`KO:K00847	GO:0005524^molecular_function^ATP binding`GO:0008865^molecular_function^fructokinase activity`GO:0019252^biological_process^starch biosynthetic process	.	.	.
XLOC_014262	TCONS_00028321	5.14568	3.4011168186633	3.96328567345959e-13	1.67541419836225e-11	C7A12_PANGI^C7A12_PANGI^Q:866-2230,H:45-500^50.98%ID^E:2e-146^RecName: Full=Cytochrome P450 CYP736A12;^Eukaryota; Viridiplantae; Streptophyta; Embryophyta; Tracheophyta; Spermatophyta; Magnoliophyta; eudicotyledons; Gunneridae; Pentapetalae; asterids; campanulids; Apiales; Araliaceae; Panax`C7A12_PANGI^C7A12_PANGI^Q:3224-2628,H:301-500^62.5%ID^E:4e-72^RecName: Full=Cytochrome P450 CYP736A12;^Euka…	.	Gene.54247::TCONS_00028321::g.54247::m.54247	716-2239[+]	C7A12_PANGI^C7A12_PANGI^Q:12-505,H:8-500^50.4%ID^E:8e-171^RecName: Full=Cytochrome P450 CYP736A12;^Eukaryota; Viridiplantae; Streptophyta; Embryophyta; Tracheophyta; Spermatophyta; Magnoliophyta; eudicotyledons; Gunneridae; Pentapetalae; asterids; campanulids; Apiales; Araliaceae; Panax	PF00067.21^p450^Cytochrome P450^40-490^E:3.8e-103	.	ExpAA=23.86^PredHel=1^Topology=i7-29o	.	.	GO:0016021^cellular_component^integral component of membrane`GO:0020037^molecular_function^heme binding`GO:0005506^molecular_function^iron ion binding`GO:0004497^molecular_function^monooxygenase activity`GO:0016705^molecular_function^oxidoreductase activity, acting on paired donors, with incorporation or reduction of molecular oxygen	GO:0005506^molecular_function^iron ion binding`GO:0016705^molecular_function^oxidoreductase activity, acting on paired donors, with incorporation or reduction of molecular oxygen`GO:0020037^molecular_function^heme binding`GO:0055114^biological_process^oxidation-reduction process	.	.
XLOC_015294	TCONS_00030433	5.12397	7.61398409547934	5.68087123914885e-27	1.00768630715608e-24	STAD6_ARATH^STAD6_ARATH^Q:167-1243,H:30-391^77.69%ID^E:0^RecName: Full=Stearoyl-[acyl-carrier-protein] 9-desaturase 6, chloroplastic;^Eukaryota; Viridiplantae; Streptophyta; Embryophyta; Tracheophyta; Spermatophyta; Magnoliophyta; eudicotyledons; Gunneridae; Pentapetalae; rosids; malvids; Brassicales; Brassicaceae; Camelineae; Arabidopsis	.	Gene.50659::TCONS_00030433::g.50659::m.50659	86-1252[+]	STAD6_ARATH^STAD6_ARATH^Q:28-386,H:30-391^77.69%ID^E:0^RecName: Full=Stearoyl-[acyl-carrier-protein] 9-desaturase 6, chloroplastic;^Eukaryota; Viridiplantae; Streptophyta; Embryophyta; Tracheophyta; Spermatophyta; Magnoliophyta; eudicotyledons; Gunneridae; Pentapetalae; rosids; malvids; Brassicales; Brassicaceae; Camelineae; Arabidopsis	PF03405.13^FA_desaturase_2^Fatty acid desaturase^53-380^E:3.6e-155	.	.	ENOG410XPNS^Converts stearoyl-ACP to oleoyl-ACP by introduction of a cis double bond between carbons Delta(9) and Delta(10) of the acyl chain	KEGG:ath:AT1G43800`KO:K03921	GO:0009507^cellular_component^chloroplast`GO:0016020^cellular_component^membrane`GO:0045300^molecular_function^acyl-[acyl-carrier-protein] desaturase activity`GO:0046872^molecular_function^metal ion binding`GO:0102786^molecular_function^stearoyl-[acp] desaturase activity`GO:0006633^biological_process^fatty acid biosynthetic process	GO:0045300^molecular_function^acyl-[acyl-carrier-protein] desaturase activity`GO:0006631^biological_process^fatty acid metabolic process`GO:0055114^biological_process^oxidation-reduction process	.	.
XLOC_000229	TCONS_00000403	5.11807	10.9671415412084	4.44112522101813e-31	1.19930266602808e-28	NC100_ARATH^NC100_ARATH^Q:1189-2154,H:10-336^57.4%ID^E:6e-113^RecName: Full=NAC domain-containing protein 100;^Eukaryota; Viridiplantae; Streptophyta; Embryophyta; Tracheophyta; Spermatophyta; Magnoliophyta; eudicotyledons; Gunneridae; Pentapetalae; rosids; malvids; Brassicales; Brassicaceae; Camelineae; Arabidopsis	.	Gene.1721::TCONS_00000403::g.1721::m.1721	1159-2157[+]	NC100_ARATH^NC100_ARATH^Q:11-332,H:10-336^57.89%ID^E:7e-124^RecName: Full=NAC domain-containing protein 100;^Eukaryota; Viridiplantae; Streptophyta; Embryophyta; Tracheophyta; Spermatophyta; Magnoliophyta; eudicotyledons; Gunneridae; Pentapetalae; rosids; malvids; Brassicales; Brassicaceae; Camelineae; Arabidopsis	PF02365.14^NAM^No apical meristem (NAM) protein^18-142^E:3.6e-36	.	.	ENOG410Y9QZ^NAC domain-containing protein	KEGG:ath:AT5G61430	GO:0005634^cellular_component^nucleus`GO:0003677^molecular_function^DNA binding`GO:0003700^molecular_function^DNA binding transcription factor activity`GO:0006351^biological_process^transcription, DNA-templated	GO:0003677^molecular_function^DNA binding`GO:0006355^biological_process^regulation of transcription, DNA-templated	.	.
XLOC_000120	TCONS_00000218	5.11744	7.98655240743123	2.99999559798093e-32	8.75466457326919e-30	UGDH1_SOYBN^UGDH1_SOYBN^Q:121-1560,H:1-480^89.17%ID^E:0^RecName: Full=UDP-glucose 6-dehydrogenase 1;^Eukaryota; Viridiplantae; Streptophyta; Embryophyta; Tracheophyta; Spermatophyta; Magnoliophyta; eudicotyledons; Gunneridae; Pentapetalae; rosids; fabids; Fabales; Fabaceae; Papilionoideae; Phaseoleae; Glycine; Soja	.	Gene.968::TCONS_00000218::g.968::m.968	121-1563[+]	UGDH1_SOYBN^UGDH1_SOYBN^Q:1-480,H:1-480^89.17%ID^E:0^RecName: Full=UDP-glucose 6-dehydrogenase 1;^Eukaryota; Viridiplantae; Streptophyta; Embryophyta; Tracheophyta; Spermatophyta; Magnoliophyta; eudicotyledons; Gunneridae; Pentapetalae; rosids; fabids; Fabales; Fabaceae; Papilionoideae; Phaseoleae; Glycine; Soja	PF03721.13^UDPG_MGDP_dh_N^UDP-glucose/GDP-mannose dehydrogenase family, NAD binding domain^3-184^E:5.9e-67`PF00984.18^UDPG_MGDP_dh^UDP-glucose/GDP-mannose dehydrogenase family, central domain^210-304^E:3.9e-32`PF03720.14^UDPG_MGDP_dh_C^UDP-glucose/GDP-mannose dehydrogenase family, UDP binding domain^328-451^E:2.8e-35	.	.	COG1004^UDP-glucose 6-dehydrogenase	KEGG:gmx:548074`KO:K00012	GO:0005829^cellular_component^cytosol`GO:0005634^cellular_component^nucleus`GO:0051287^molecular_function^NAD binding`GO:0003979^molecular_function^UDP-glucose 6-dehydrogenase activity`GO:0006024^biological_process^glycosaminoglycan biosynthetic process`GO:0006065^biological_process^UDP-glucuronate biosynthetic process	GO:0016616^molecular_function^oxidoreductase activity, acting on the CH-OH group of donors, NAD or NADP as acceptor`GO:0051287^molecular_function^NAD binding`GO:0055114^biological_process^oxidation-reduction process	.	.
XLOC_015082	TCONS_00029978	5.09585	3.12328008717867	2.43521928805876e-07	3.52201619335308e-06	PDR2_NICPL^PDR2_NICPL^Q:361-4119,H:196-1461^79.54%ID^E:0^RecName: Full=Pleiotropic drug resistance protein 2;^Eukaryota; Viridiplantae; Streptophyta; Embryophyta; Tracheophyta; Spermatophyta; Magnoliophyta; eudicotyledons; Gunneridae; Pentapetalae; asterids; lamiids; Solanales; Solanaceae; Nicotianoideae; Nicotianeae; Nicotiana`PDR2_NICPL^PDR2_NICPL^Q:2380-4107,H:182-795^23.48%ID^E:1e-28^RecName:…	.	Gene.49322::TCONS_00029978::g.49322::m.49322	1-4122[+]	PDR2_NICPL^PDR2_NICPL^Q:121-1373,H:196-1461^79.54%ID^E:0^RecName: Full=Pleiotropic drug resistance protein 2;^Eukaryota; Viridiplantae; Streptophyta; Embryophyta; Tracheophyta; Spermatophyta; Magnoliophyta; eudicotyledons; Gunneridae; Pentapetalae; asterids; lamiids; Solanales; Solanaceae; Nicotianoideae; Nicotianeae; Nicotiana`PDR2_NICPL^PDR2_NICPL^Q:794-1369,H:182-795^24.29%ID^E:1e-31^RecName: …	PF00005.26^ABC_tran^ABC transporter^123-295^E:7.5e-11`PF01061.23^ABC2_membrane^ABC-2 type transporter^449-661^E:8.3e-40`PF08370.10^PDR_assoc^Plant PDR ABC transporter associated^672-727^E:4.4e-25`PF00005.26^ABC_tran^ABC transporter^800-952^E:2.6e-19`PF01061.23^ABC2_membrane^ABC-2 type transporter^1097-1310^E:2.4e-50	.	ExpAA=290.67^PredHel=13^Topology=o465-487i500-522o542-564i585-604o610-632i690-712o1118-1137i1150-1172o1197-1219i1232-1254o1259-1281i1288-1307o1342-1364i	.	.	GO:0016021^cellular_component^integral component of membrane`GO:0005524^molecular_function^ATP binding`GO:0016887^molecular_function^ATPase activity`GO:0006810^biological_process^transport	GO:0005524^molecular_function^ATP binding`GO:0016887^molecular_function^ATPase activity`GO:0016020^cellular_component^membrane	.	.
XLOC_003457	TCONS_00006797	5.07987	6.34381002938533	5.13969201296019e-30	1.32846353700698e-27	RHIE_DICD3^RHIE_DICD3^Q:353-1225,H:28-290^23.36%ID^E:1e-21^RecName: Full=Rhamnogalacturonate lyase;^Bacteria; Proteobacteria; Gammaproteobacteria; Enterobacterales; Pectobacteriaceae; Dickeya`RHIE_DICD3^RHIE_DICD3^Q:1641-2228,H:411-577^27.09%ID^E:1e-21^RecName: Full=Rhamnogalacturonate lyase;^Bacteria; Proteobacteria; Gammaproteobacteria; Enterobacterales; Pectobacteriaceae; Dickeya`RHIE_DICD3^RH…	.	Gene.14508::TCONS_00006797::g.14508::m.14508	341-1270[+]	RHIE_DICD3^RHIE_DICD3^Q:5-295,H:28-290^22.77%ID^E:5e-09^RecName: Full=Rhamnogalacturonate lyase;^Bacteria; Proteobacteria; Gammaproteobacteria; Enterobacterales; Pectobacteriaceae; Dickeya	PF06045.10^Rhamnogal_lyase^Rhamnogalacturonate lyase family^10-201^E:1.1e-90	.	.	ENOG410YE12^Rhamnogalacturonate lyase	KEGG:ddd:Dda3937_01465`KO:K18195	GO:0005576^cellular_component^extracellular region`GO:0030246^molecular_function^carbohydrate binding`GO:0102210^molecular_function^rhamnogalacturonan endolyase activity`GO:0005975^biological_process^carbohydrate metabolic process`GO:0009405^biological_process^pathogenesis	.	.	.
XLOC_003953	TCONS_00007753	5.06492	3.63228019943257	2.48989729958177e-11	7.9034582177777e-10	MDL1_PRUSE^MDL1_PRUSE^Q:96-1643,H:30-546^51.64%ID^E:0^RecName: Full=(R)-mandelonitrile lyase 1;^Eukaryota; Viridiplantae; Streptophyta; Embryophyta; Tracheophyta; Spermatophyta; Magnoliophyta; eudicotyledons; Gunneridae; Pentapetalae; rosids; fabids; Rosales; Rosaceae; Maloideae; Amygdaleae; Prunus	.	Gene.10513::TCONS_00007753::g.10513::m.10513	3-1646[+]	MDL1_PRUSE^MDL1_PRUSE^Q:32-547,H:30-546^52.31%ID^E:0^RecName: Full=(R)-mandelonitrile lyase 1;^Eukaryota; Viridiplantae; Streptophyta; Embryophyta; Tracheophyta; Spermatophyta; Magnoliophyta; eudicotyledons; Gunneridae; Pentapetalae; rosids; fabids; Rosales; Rosaceae; Maloideae; Amygdaleae; Prunus	PF00732.18^GMC_oxred_N^GMC oxidoreductase^56-324^E:4.8e-32`PF05199.12^GMC_oxred_C^GMC oxidoreductase^394-535^E:3.5e-29	sigP:1^30^0.705^YES	ExpAA=23.49^PredHel=1^Topology=i13-35o	.	.	GO:0033095^cellular_component^aleurone grain`GO:0005773^cellular_component^vacuole`GO:0050660^molecular_function^flavin adenine dinucleotide binding`GO:0046593^molecular_function^mandelonitrile lyase activity`GO:0016614^molecular_function^oxidoreductase activity, acting on CH-OH group of donors	GO:0016614^molecular_function^oxidoreductase activity, acting on CH-OH group of donors`GO:0050660^molecular_function^flavin adenine dinucleotide binding`GO:0055114^biological_process^oxidation-reduction process	.	.
XLOC_013531	TCONS_00026851	5.06386	5.10890359518601	6.02582593028085e-20	6.33867840445182e-18	.	.	Gene.48990::TCONS_00026851::g.48990::m.48990	25-771[+]	.	.	.	.	.	.	.	.	.	.
XLOC_003016	TCONS_00005976	5.04693	7.26513182454469	3.99775823233633e-18	3.30280546564663e-16	.	.	Gene.11757::TCONS_00005976::g.11757::m.11757	25-381[+]	Y4445_ARATH^Y4445_ARATH^Q:15-118,H:38-125^41.67%ID^E:1e-10^RecName: Full=Uncharacterized protein At4g14450, chloroplastic;^Eukaryota; Viridiplantae; Streptophyta; Embryophyta; Tracheophyta; Spermatophyta; Magnoliophyta; eudicotyledons; Gunneridae; Pentapetalae; rosids; malvids; Brassicales; Brassicaceae; Camelineae; Arabidopsis	.	.	.	ENOG411154Q^NA	KEGG:ath:AT4G14450	GO:0009507^cellular_component^chloroplast	.	.	.
XLOC_004710	TCONS_00009226	5.04514	8.64593096286152	1.54610995615348e-17	1.18783771991874e-15	Y2859_MYCTU^Y2859_MYCTU^Q:59-784,H:61-280^29.73%ID^E:5e-18^RecName: Full=Putative glutamine amidotransferase Rv2859c;^Bacteria; Actinobacteria; Corynebacteriales; Mycobacteriaceae; Mycobacterium; Mycobacterium tuberculosis complex	.	Gene.15791::TCONS_00009226::g.15791::m.15791	2-1294[+]	Y2859_MYCTU^Y2859_MYCTU^Q:20-261,H:61-280^29.73%ID^E:1e-18^RecName: Full=Putative glutamine amidotransferase Rv2859c;^Bacteria; Actinobacteria; Corynebacteriales; Mycobacteriaceae; Mycobacterium; Mycobacterium tuberculosis complex	PF07722.12^Peptidase_C26^Peptidase C26^37-260^E:2e-40`PF00117.27^GATase^Glutamine amidotransferase class-I^119-266^E:1.2e-11	.	.	COG2071^Glutamine amidotransferase	KEGG:mtu:Rv2859c`KO:K07010	GO:0016787^molecular_function^hydrolase activity`GO:0016740^molecular_function^transferase activity`GO:0006541^biological_process^glutamine metabolic process	GO:0016787^molecular_function^hydrolase activity	.	.
XLOC_014497	TCONS_00028783	5.03597	5.81390435683668	5.53895771109938e-24	8.08196466668718e-22	G2OX_PHACN^G2OX_PHACN^Q:100-1059,H:1-329^61.49%ID^E:1e-139^RecName: Full=Gibberellin 2-beta-dioxygenase;^Eukaryota; Viridiplantae; Streptophyta; Embryophyta; Tracheophyta; Spermatophyta; Magnoliophyta; eudicotyledons; Gunneridae; Pentapetalae; rosids; fabids; Fabales; Fabaceae; Papilionoideae; Phaseoleae; Phaseolus	.	Gene.55756::TCONS_00028783::g.55756::m.55756	100-1071[+]	G2OX_PHACN^G2OX_PHACN^Q:1-320,H:1-329^61.49%ID^E:1e-140^RecName: Full=Gibberellin 2-beta-dioxygenase;^Eukaryota; Viridiplantae; Streptophyta; Embryophyta; Tracheophyta; Spermatophyta; Magnoliophyta; eudicotyledons; Gunneridae; Pentapetalae; rosids; fabids; Fabales; Fabaceae; Papilionoideae; Phaseoleae; Phaseolus	PF14226.5^DIOX_N^non-haem dioxygenase in morphine synthesis N-terminal^31-100^E:8.3e-13`PF03171.19^2OG-FeII_Oxy^2OG-Fe(II) oxygenase superfamily^166-269^E:1.3e-25	.	.	.	.	GO:0045543^molecular_function^gibberellin 2-beta-dioxygenase activity`GO:0046872^molecular_function^metal ion binding`GO:0009686^biological_process^gibberellin biosynthetic process	GO:0016491^molecular_function^oxidoreductase activity`GO:0055114^biological_process^oxidation-reduction process	.	.
XLOC_006468	TCONS_00012799	5.00766	6.19304792810855	4.93977584257929e-28	9.50801748082841e-26	JAL3_ARATH^JAL3_ARATH^Q:2301-2675,H:26-150^46.09%ID^E:2e-21^RecName: Full=Jacalin-related lectin 3;^Eukaryota; Viridiplantae; Streptophyta; Embryophyta; Tracheophyta; Spermatophyta; Magnoliophyta; eudicotyledons; Gunneridae; Pentapetalae; rosids; malvids; Brassicales; Brassicaceae; Camelineae; Arabidopsis`JAL3_ARATH^JAL3_ARATH^Q:2301-2675,H:451-578^42.64%ID^E:5e-16^RecName: Full=Jacalin-related l…	.	Gene.28078::TCONS_00012799::g.28078::m.28078	225-2714[+]	JAL19_ARATH^JAL19_ARATH^Q:669-817,H:1-149^39.07%ID^E:1e-29^RecName: Full=Jacalin-related lectin 19;^Eukaryota; Viridiplantae; Streptophyta; Embryophyta; Tracheophyta; Spermatophyta; Magnoliophyta; eudicotyledons; Gunneridae; Pentapetalae; rosids; malvids; Brassicales; Brassicaceae; Camelineae; Arabidopsis	PF03107.15^C1_2^C1 domain^10-56^E:2.1e-06`PF03107.15^C1_2^C1 domain^188-230^E:2.5e-08`PF03107.15^C1_2^C1 domain^235-277^E:1.6e-06`PF03107.15^C1_2^C1 domain^287-341^E:3.9e-06`PF03107.15^C1_2^C1 domain^376-421^E:1.9e-08`PF03107.15^C1_2^C1 domain^484-528^E:6.9e-08`PF03107.15^C1_2^C1 domain^540-586^E:7.8e-08`PF01419.16^Jacalin^Jacalin-like lectin domain^691-819^E:1.8e-25	.	.	ENOG410Y7QC^jacalin lectin family protein	KEGG:ath:AT1G73040	GO:0030246^molecular_function^carbohydrate binding	.	.	.
XLOC_005707	TCONS_00011233	5.0015	0.465696171398861	0.000123251273685095	0.000806796416347478	.	.	.	.	.	.	.	.	.	.	.	.	.	.
XLOC_008821	TCONS_00017347	4.99489	9.58921600929958	1.28487904477216e-27	2.37217515888395e-25	HEM6_SOYBN^HEM6_SOYBN^Q:255-1274,H:51-385^86.47%ID^E:0^RecName: Full=Oxygen-dependent coproporphyrinogen-III oxidase, chloroplastic;^Eukaryota; Viridiplantae; Streptophyta; Embryophyta; Tracheophyta; Spermatophyta; Magnoliophyta; eudicotyledons; Gunneridae; Pentapetalae; rosids; fabids; Fabales; Fabaceae; Papilionoideae; Phaseoleae; Glycine; Soja	.	Gene.31468::TCONS_00017347::g.31468::m.31468	81-1277[+]	HEM6_SOYBN^HEM6_SOYBN^Q:59-398,H:51-385^86.47%ID^E:0^RecName: Full=Oxygen-dependent coproporphyrinogen-III oxidase, chloroplastic;^Eukaryota; Viridiplantae; Streptophyta; Embryophyta; Tracheophyta; Spermatophyta; Magnoliophyta; eudicotyledons; Gunneridae; Pentapetalae; rosids; fabids; Fabales; Fabaceae; Papilionoideae; Phaseoleae; Glycine; Soja	PF01218.17^Coprogen_oxidas^Coproporphyrinogen III oxidase^96-398^E:1.3e-137	.	.	COG0408^Key enzyme in heme biosynthesis. Catalyzes the oxidative decarboxylation of propionic acid side chains of rings A and B of coproporphyrinogen III (By similarity)	.	GO:0009507^cellular_component^chloroplast`GO:0004109^molecular_function^coproporphyrinogen oxidase activity`GO:0042803^molecular_function^protein homodimerization activity`GO:0015995^biological_process^chlorophyll biosynthetic process`GO:0006782^biological_process^protoporphyrinogen IX biosynthetic process	GO:0004109^molecular_function^coproporphyrinogen oxidase activity`GO:0006779^biological_process^porphyrin-containing compound biosynthetic process`GO:0055114^biological_process^oxidation-reduction process	.	.
XLOC_000300	TCONS_00000562	4.97432	6.90787759803997	1.15318625843946e-07	1.81589199076982e-06	MIRA_SYNDU^MIRA_SYNDU^Q:745-206,H:31-217^48.66%ID^E:4e-40^RecName: Full=Miraculin;^Eukaryota; Viridiplantae; Streptophyta; Embryophyta; Tracheophyta; Spermatophyta; Magnoliophyta; eudicotyledons; Gunneridae; Pentapetalae; asterids; Ericales; Sapotaceae; Chrysophylloideae; Synsepalum	.	Gene.2304::TCONS_00000562::g.2304::m.2304	203-787[-]	MIRA_SYNDU^MIRA_SYNDU^Q:15-194,H:31-217^49.2%ID^E:5e-52^RecName: Full=Miraculin;^Eukaryota; Viridiplantae; Streptophyta; Embryophyta; Tracheophyta; Spermatophyta; Magnoliophyta; eudicotyledons; Gunneridae; Pentapetalae; asterids; Ericales; Sapotaceae; Chrysophylloideae; Synsepalum	PF00197.17^Kunitz_legume^Trypsin and protease inhibitor^20-193^E:9.7e-52	sigP:1^19^0.756^YES	.	.	.	GO:0004866^molecular_function^endopeptidase inhibitor activity	GO:0004866^molecular_function^endopeptidase inhibitor activity	.	.
XLOC_017086	TCONS_00033850	4.97413	6.16293228574314	4.79068675016098e-22	5.97778588763191e-20	ACA12_ARATH^ACA12_ARATH^Q:3219-883,H:157-934^30.98%ID^E:2e-74^RecName: Full=Calcium-transporting ATPase 12, plasma membrane-type;^Eukaryota; Viridiplantae; Streptophyta; Embryophyta; Tracheophyta; Spermatophyta; Magnoliophyta; eudicotyledons; Gunneridae; Pentapetalae; rosids; malvids; Brassicales; Brassicaceae; Camelineae; Arabidopsis	.	Gene.56839::TCONS_00033850::g.56839::m.56839	829-2778[-]	ACA12_ARATH^ACA12_ARATH^Q:117-632,H:411-934^31.78%ID^E:4e-59^RecName: Full=Calcium-transporting ATPase 12, plasma membrane-type;^Eukaryota; Viridiplantae; Streptophyta; Embryophyta; Tracheophyta; Spermatophyta; Magnoliophyta; eudicotyledons; Gunneridae; Pentapetalae; rosids; malvids; Brassicales; Brassicaceae; Camelineae; Arabidopsis	PF00689.20^Cation_ATPase_C^Cation transporting ATPase, C-terminus^530-634^E:5.4e-10	.	ExpAA=134.30^PredHel=6^Topology=i39-61o107-129i506-528o532-554i583-605o625-647i	ENOG410XNNC^ATPase, Ca transporting, plasma membrane	KEGG:ath:AT3G63380`KO:K01537	GO:0005887^cellular_component^integral component of plasma membrane`GO:0043231^cellular_component^intracellular membrane-bounded organelle`GO:0005524^molecular_function^ATP binding`GO:0005388^molecular_function^calcium-transporting ATPase activity`GO:0005516^molecular_function^calmodulin binding`GO:0046872^molecular_function^metal ion binding	.	.	.
XLOC_010861	TCONS_00021432	4.95385	0.987773529199658	9.67956044115237e-05	0.000656171926046346	AGP16_ARATH^AGP16_ARATH^Q:326-490,H:15-65^65.45%ID^E:4e-11^RecName: Full=Arabinogalactan peptide 16;^Eukaryota; Viridiplantae; Streptophyta; Embryophyta; Tracheophyta; Spermatophyta; Magnoliophyta; eudicotyledons; Gunneridae; Pentapetalae; rosids; malvids; Brassicales; Brassicaceae; Camelineae; Arabidopsis	.	.	.	.	.	.	.	ENOG410Z4BH^Arabinogalactan peptide	KEGG:ath:AT2G46330	GO:0031225^cellular_component^anchored component of membrane`GO:0005886^cellular_component^plasma membrane	.	.	.
XLOC_005073	TCONS_00009984	4.94766	8.46308472468994	3.02610436936351e-29	6.84391329436175e-27	PUR2_ARATH^PUR2_ARATH^Q:376-1884,H:8-531^73.28%ID^E:0^RecName: Full=Phosphoribosylamine--glycine ligase, chloroplastic;^Eukaryota; Viridiplantae; Streptophyta; Embryophyta; Tracheophyta; Spermatophyta; Magnoliophyta; eudicotyledons; Gunneridae; Pentapetalae; rosids; malvids; Brassicales; Brassicaceae; Camelineae; Arabidopsis	.	Gene.18312::TCONS_00009984::g.18312::m.18312	283-1887[+]	PUR2_ARATH^PUR2_ARATH^Q:32-534,H:8-531^73.28%ID^E:0^RecName: Full=Phosphoribosylamine--glycine ligase, chloroplastic;^Eukaryota; Viridiplantae; Streptophyta; Embryophyta; Tracheophyta; Spermatophyta; Magnoliophyta; eudicotyledons; Gunneridae; Pentapetalae; rosids; malvids; Brassicales; Brassicaceae; Camelineae; Arabidopsis	PF02844.14^GARS_N^Phosphoribosylglycinamide synthetase, N domain^101-201^E:4.4e-30`PF01071.18^GARS_A^Phosphoribosylglycinamide synthetase, ATP-grasp (A) domain^202-396^E:3.8e-83`PF02222.21^ATP-grasp^ATP-grasp domain^213-290^E:2.5e-05`PF02843.15^GARS_C^Phosphoribosylglycinamide synthetase, C domain^432-524^E:1.3e-27	.	.	COG0151^Phosphoribosylglycinamide synthetase	KEGG:ath:AT1G09830`KO:K01945	GO:0009507^cellular_component^chloroplast`GO:0009570^cellular_component^chloroplast stroma`GO:0005524^molecular_function^ATP binding`GO:0046872^molecular_function^metal ion binding`GO:0004637^molecular_function^phosphoribosylamine-glycine ligase activity`GO:0006189^biological_process^'de novo' IMP biosynthetic process`GO:0009113^biological_process^purine nucleobase biosynthetic process	GO:0004637^molecular_function^phosphoribosylamine-glycine ligase activity`GO:0009113^biological_process^purine nucleobase biosynthetic process	.	.
XLOC_016775	TCONS_00033237	4.94169	8.55240949040478	9.7571742787249e-23	1.29806289871301e-20	PME7_ARATH^PME7_ARATH^Q:128-1720,H:26-577^62.57%ID^E:0^RecName: Full=Probable pectinesterase/pectinesterase inhibitor 7;^Eukaryota; Viridiplantae; Streptophyta; Embryophyta; Tracheophyta; Spermatophyta; Magnoliophyta; eudicotyledons; Gunneridae; Pentapetalae; rosids; malvids; Brassicales; Brassicaceae; Camelineae; Arabidopsis	.	Gene.60418::TCONS_00033237::g.60418::m.60418	1-492[+]	.	.	.	.	.	.	.	.	.	.
XLOC_011436	TCONS_00022575	4.91237	3.89046893974355	1.10952517314827e-15	6.64723144297074e-14	GEML4_ARATH^GEML4_ARATH^Q:121-621,H:50-211^59.28%ID^E:1e-66^RecName: Full=GEM-like protein 4;^Eukaryota; Viridiplantae; Streptophyta; Embryophyta; Tracheophyta; Spermatophyta; Magnoliophyta; eudicotyledons; Gunneridae; Pentapetalae; rosids; malvids; Brassicales; Brassicaceae; Camelineae; Arabidopsis	.	Gene.42080::TCONS_00022575::g.42080::m.42080	1-630[+]	GEML4_ARATH^GEML4_ARATH^Q:6-207,H:16-211^51.69%ID^E:7e-68^RecName: Full=GEM-like protein 4;^Eukaryota; Viridiplantae; Streptophyta; Embryophyta; Tracheophyta; Spermatophyta; Magnoliophyta; eudicotyledons; Gunneridae; Pentapetalae; rosids; malvids; Brassicales; Brassicaceae; Camelineae; Arabidopsis	PF02893.19^GRAM^GRAM domain^92-207^E:6e-22	.	.	ENOG410YH6H^GEM-like protein	KEGG:ath:AT5G08350	.	.	.	.
XLOC_005323	TCONS_00010490	4.91083	7.44645836620546	2.72479145852966e-14	1.35438604008728e-12	ITH5_CUCMA^ITH5_CUCMA^Q:224-388,H:2-56^49.09%ID^E:4e-08^RecName: Full=Inhibitor of trypsin and hageman factor;^Eukaryota; Viridiplantae; Streptophyta; Embryophyta; Tracheophyta; Spermatophyta; Magnoliophyta; eudicotyledons; Gunneridae; Pentapetalae; rosids; fabids; Cucurbitales; Cucurbitaceae; Cucurbiteae; Cucurbita	.	.	.	.	.	.	.	.	.	GO:0004867^molecular_function^serine-type endopeptidase inhibitor activity`GO:0009611^biological_process^response to wounding	.	.	.
XLOC_005078	TCONS_00010004	4.88312	8.81488806556595	4.94673702927318e-23	6.72942203538643e-21	PTR16_ARATH^PTR16_ARATH^Q:69-1721,H:5-550^69.98%ID^E:0^RecName: Full=Protein NRT1/ PTR FAMILY 4.3;^Eukaryota; Viridiplantae; Streptophyta; Embryophyta; Tracheophyta; Spermatophyta; Magnoliophyta; eudicotyledons; Gunneridae; Pentapetalae; rosids; malvids; Brassicales; Brassicaceae; Camelineae; Arabidopsis	.	Gene.18370::TCONS_00010004::g.18370::m.18370	72-1913[+]	PTR16_ARATH^PTR16_ARATH^Q:2-573,H:7-573^70.56%ID^E:0^RecName: Full=Protein NRT1/ PTR FAMILY 4.3;^Eukaryota; Viridiplantae; Streptophyta; Embryophyta; Tracheophyta; Spermatophyta; Magnoliophyta; eudicotyledons; Gunneridae; Pentapetalae; rosids; malvids; Brassicales; Brassicaceae; Camelineae; Arabidopsis	PF00854.20^PTR2^POT family^109-538^E:5.6e-90	.	ExpAA=258.50^PredHel=11^Topology=i45-67o82-101i106-128o162-184i205-227o237-258i347-369o394-416i467-489o504-526i552-574o	COG3104^transporter	KEGG:ath:AT1G59740	GO:0016021^cellular_component^integral component of membrane`GO:0005886^cellular_component^plasma membrane`GO:0005215^molecular_function^transporter activity`GO:0006857^biological_process^oligopeptide transport`GO:0009624^biological_process^response to nematode	GO:0005215^molecular_function^transporter activity`GO:0006810^biological_process^transport`GO:0016020^cellular_component^membrane	.	.
XLOC_002790	TCONS_00005535	4.87671	2.0434301091135	6.06616433739859e-09	1.21276366139837e-07	.	.	Gene.10198::TCONS_00005535::g.10198::m.10198	67-486[+]	.	.	.	.	.	.	.	.	.	.
XLOC_014691	TCONS_00029151	4.86859	3.71122511366894	1.45586308579553e-08	2.72117053835728e-07	CPC_CUCSA^CPC_CUCSA^Q:115-411,H:5-106^34.95%ID^E:1e-12^RecName: Full=Cucumber peeling cupredoxin;^Eukaryota; Viridiplantae; Streptophyta; Embryophyta; Tracheophyta; Spermatophyta; Magnoliophyta; eudicotyledons; Gunneridae; Pentapetalae; rosids; fabids; Cucurbitales; Cucurbitaceae; Benincaseae; Cucumis	.	Gene.46478::TCONS_00029151::g.46478::m.46478	1-504[+]	CPC_CUCSA^CPC_CUCSA^Q:39-137,H:5-106^34.95%ID^E:8e-13^RecName: Full=Cucumber peeling cupredoxin;^Eukaryota; Viridiplantae; Streptophyta; Embryophyta; Tracheophyta; Spermatophyta; Magnoliophyta; eudicotyledons; Gunneridae; Pentapetalae; rosids; fabids; Cucurbitales; Cucurbitaceae; Benincaseae; Cucumis	PF02298.16^Cu_bind_like^Plastocyanin-like domain^47-130^E:1.3e-09	.	ExpAA=41.22^PredHel=2^Topology=o15-37i147-166o	.	.	GO:0009055^molecular_function^electron transfer activity`GO:0046872^molecular_function^metal ion binding`GO:0055114^biological_process^oxidation-reduction process	GO:0009055^molecular_function^electron transfer activity	.	.
XLOC_015669	TCONS_00031194	4.85615	5.95962712705195	3.62983115640515e-18	3.01259335379992e-16	.	.	Gene.53323::TCONS_00031194::g.53323::m.53323	67-531[+]	.	PF14009.5^DUF4228^Domain of unknown function (DUF4228)^1-125^E:1.7e-26	.	.	.	.	.	.	.	.
XLOC_002355	TCONS_00004590	4.84088	4.6081376107596	8.09332596134518e-12	2.81060550131705e-10	CKX3_ARATH^CKX3_ARATH^Q:163-1020,H:55-333^55.24%ID^E:2e-104^RecName: Full=Cytokinin dehydrogenase 3;^Eukaryota; Viridiplantae; Streptophyta; Embryophyta; Tracheophyta; Spermatophyta; Magnoliophyta; eudicotyledons; Gunneridae; Pentapetalae; rosids; malvids; Brassicales; Brassicaceae; Camelineae; Arabidopsis`CKX3_ARATH^CKX3_ARATH^Q:1019-1294,H:423-514^55.43%ID^E:9e-31^RecName: Full=Cytokinin dehydr…	.	Gene.7254::TCONS_00004590::g.7254::m.7254	31-1029[+]	CKX3_ARATH^CKX3_ARATH^Q:45-330,H:55-333^55.24%ID^E:6e-108^RecName: Full=Cytokinin dehydrogenase 3;^Eukaryota; Viridiplantae; Streptophyta; Embryophyta; Tracheophyta; Spermatophyta; Magnoliophyta; eudicotyledons; Gunneridae; Pentapetalae; rosids; malvids; Brassicales; Brassicaceae; Camelineae; Arabidopsis	PF01565.22^FAD_binding_4^FAD binding domain^60-205^E:2e-21`PF09265.9^Cytokin-bind^Cytokinin dehydrogenase 1, FAD and cytokinin binding^237-330^E:9.7e-24	.	.	COG0277^FAD linked oxidase domain protein	KEGG:ath:AT5G56970`KO:K00279	GO:0005783^cellular_component^endoplasmic reticulum`GO:0005773^cellular_component^vacuole`GO:0019139^molecular_function^cytokinin dehydrogenase activity`GO:0050660^molecular_function^flavin adenine dinucleotide binding`GO:0016614^molecular_function^oxidoreductase activity, acting on CH-OH group of donors`GO:0008131^molecular_function^primary amine oxidase activity`GO:0009823^biological_process^cy…	GO:0016491^molecular_function^oxidoreductase activity`GO:0050660^molecular_function^flavin adenine dinucleotide binding`GO:0055114^biological_process^oxidation-reduction process`GO:0019139^molecular_function^cytokinin dehydrogenase activity`GO:0009690^biological_process^cytokinin metabolic process	.	.
XLOC_002623	TCONS_00005177	4.82499	3.11147776657848	4.0223789915237e-10	1.01501956894893e-08	PROF4_CORAV^PROF4_CORAV^Q:106-372,H:1-89^89.89%ID^E:5e-49^RecName: Full=Profilin-4;^Eukaryota; Viridiplantae; Streptophyta; Embryophyta; Tracheophyta; Spermatophyta; Magnoliophyta; eudicotyledons; Gunneridae; Pentapetalae; rosids; fabids; Fagales; Betulaceae; Corylus`PROF4_CORAV^PROF4_CORAV^Q:1036-1170,H:89-133^95.56%ID^E:1e-20^RecName: Full=Profilin-4;^Eukaryota; Viridiplantae; Streptophyta; Emb…	.	.	.	.	.	.	.	.	.	GO:0005737^cellular_component^cytoplasm`GO:0005856^cellular_component^cytoskeleton`GO:0003779^molecular_function^actin binding	.	.	.
XLOC_017911	TCONS_00035464	4.81478	5.62552398532534	3.08367848226476e-20	3.3610237819046e-18	Y1648_ARATH^Y1648_ARATH^Q:1-480,H:15-177^45.29%ID^E:2e-39^RecName: Full=Uncharacterized protein At1g66480;^Eukaryota; Viridiplantae; Streptophyta; Embryophyta; Tracheophyta; Spermatophyta; Magnoliophyta; eudicotyledons; Gunneridae; Pentapetalae; rosids; malvids; Brassicales; Brassicaceae; Camelineae; Arabidopsis	.	Gene.62203::TCONS_00035464::g.62203::m.62203	1-609[+]	Y1648_ARATH^Y1648_ARATH^Q:1-200,H:15-218^42.52%ID^E:4e-43^RecName: Full=Uncharacterized protein At1g66480;^Eukaryota; Viridiplantae; Streptophyta; Embryophyta; Tracheophyta; Spermatophyta; Magnoliophyta; eudicotyledons; Gunneridae; Pentapetalae; rosids; malvids; Brassicales; Brassicaceae; Camelineae; Arabidopsis	PF14009.5^DUF4228^Domain of unknown function (DUF4228)^2-146^E:2.2e-15	.	.	ENOG41117UA^NA	KEGG:ath:AT1G66480	GO:0005886^cellular_component^plasma membrane	.	.	.
XLOC_017663	TCONS_00035006	4.80678	6.02956084400346	6.80170134668358e-13	2.77169329877356e-11	PER5_VITVI^PER5_VITVI^Q:10-786,H:74-328^50.38%ID^E:1e-73^RecName: Full=Peroxidase 5 {ECO:0000250|UniProtKB:P22195};^Eukaryota; Viridiplantae; Streptophyta; Embryophyta; Tracheophyta; Spermatophyta; Magnoliophyta; eudicotyledons; Gunneridae; Pentapetalae; rosids; Vitales; Vitaceae; Vitis	.	Gene.60675::TCONS_00035006::g.60675::m.60675	1-789[+]	PER5_VITVI^PER5_VITVI^Q:4-262,H:74-328^51.54%ID^E:4e-78^RecName: Full=Peroxidase 5 {ECO:0000250|UniProtKB:P22195};^Eukaryota; Viridiplantae; Streptophyta; Embryophyta; Tracheophyta; Spermatophyta; Magnoliophyta; eudicotyledons; Gunneridae; Pentapetalae; rosids; Vitales; Vitaceae; Vitis	PF00141.22^peroxidase^Peroxidase^4-224^E:1e-54	.	.	ENOG410YDTD^peroxidase	.	GO:0005576^cellular_component^extracellular region`GO:0020037^molecular_function^heme binding`GO:0046872^molecular_function^metal ion binding`GO:0004601^molecular_function^peroxidase activity`GO:0042744^biological_process^hydrogen peroxide catabolic process`GO:0006979^biological_process^response to oxidative stress	GO:0004601^molecular_function^peroxidase activity`GO:0020037^molecular_function^heme binding`GO:0006979^biological_process^response to oxidative stress`GO:0055114^biological_process^oxidation-reduction process	.	.
XLOC_016283	TCONS_00032329	4.78944	5.90328858600349	1.17412092584068e-27	2.19003813517891e-25	.	.	.	.	.	.	.	.	.	.	.	.	.	.
XLOC_007206	TCONS_00014210	4.78712	2.51501870205532	3.78860853594039e-06	3.98994727827529e-05	STP13_ARATH^STP13_ARATH^Q:1-1506,H:1-501^76.29%ID^E:0^RecName: Full=Sugar transport protein 13;^Eukaryota; Viridiplantae; Streptophyta; Embryophyta; Tracheophyta; Spermatophyta; Magnoliophyta; eudicotyledons; Gunneridae; Pentapetalae; rosids; malvids; Brassicales; Brassicaceae; Camelineae; Arabidopsis	.	Gene.20362::TCONS_00014210::g.20362::m.20362	1-1536[+]	STP13_ARATH^STP13_ARATH^Q:1-502,H:1-501^76.29%ID^E:0^RecName: Full=Sugar transport protein 13;^Eukaryota; Viridiplantae; Streptophyta; Embryophyta; Tracheophyta; Spermatophyta; Magnoliophyta; eudicotyledons; Gunneridae; Pentapetalae; rosids; malvids; Brassicales; Brassicaceae; Camelineae; Arabidopsis	PF00083.23^Sugar_tr^Sugar (and other) transporter^28-486^E:1.5e-120`PF07690.15^MFS_1^Major Facilitator Superfamily^69-438^E:2.7e-25	.	ExpAA=246.68^PredHel=11^Topology=o20-42i84-106o116-138i170-192o202-224i285-307o322-344i351-373o388-410i423-445o455-474i	ENOG410XNQK^Transporter	KEGG:ath:AT5G26340	GO:0016021^cellular_component^integral component of membrane`GO:0005886^cellular_component^plasma membrane`GO:0009506^cellular_component^plasmodesma`GO:0009679^molecular_function^hexose:proton symporter activity`GO:0005358^molecular_function^high-affinity hydrogen:glucose symporter activity`GO:0015145^molecular_function^monosaccharide transmembrane transporter activity`GO:0046323^biological_proce…	GO:0022857^molecular_function^transmembrane transporter activity`GO:0055085^biological_process^transmembrane transport`GO:0016021^cellular_component^integral component of membrane	.	.
XLOC_003810	TCONS_00007501	4.77195	5.19764052468136	1.75463045938238e-22	2.28392294256154e-20	TIL_ARATH^TIL_ARATH^Q:157-705,H:4-186^70.49%ID^E:8e-89^RecName: Full=Temperature-induced lipocalin-1 {ECO:0000303|PubMed:18671872};^Eukaryota; Viridiplantae; Streptophyta; Embryophyta; Tracheophyta; Spermatophyta; Magnoliophyta; eudicotyledons; Gunneridae; Pentapetalae; rosids; malvids; Brassicales; Brassicaceae; Camelineae; Arabidopsis	.	Gene.9593::TCONS_00007501::g.9593::m.9593	1-708[+]	TIL_ARATH^TIL_ARATH^Q:53-235,H:4-186^70.49%ID^E:4e-96^RecName: Full=Temperature-induced lipocalin-1 {ECO:0000303|PubMed:18671872};^Eukaryota; Viridiplantae; Streptophyta; Embryophyta; Tracheophyta; Spermatophyta; Magnoliophyta; eudicotyledons; Gunneridae; Pentapetalae; rosids; malvids; Brassicales; Brassicaceae; Camelineae; Arabidopsis	PF08212.11^Lipocalin_2^Lipocalin-like domain^62-208^E:6.7e-53`PF00061.22^Lipocalin^Lipocalin / cytosolic fatty-acid binding protein family^68-211^E:1.9e-06	.	.	COG3040^Outer membrane lipoprotein	KEGG:ath:AT5G58070`KO:K03098	GO:0009941^cellular_component^chloroplast envelope`GO:0031969^cellular_component^chloroplast membrane`GO:0005737^cellular_component^cytoplasm`GO:0009898^cellular_component^cytoplasmic side of plasma membrane`GO:0005783^cellular_component^endoplasmic reticulum`GO:0005794^cellular_component^Golgi apparatus`GO:0005739^cellular_component^mitochondrion`GO:0005886^cellular_component^plasma membrane`GO:…	.	.	.
XLOC_001434	TCONS_00002810	4.75281	8.95101074249534	6.65662850529796e-22	8.24920407851753e-20	LBD41_ARATH^LBD41_ARATH^Q:50-754,H:1-226^53.36%ID^E:9e-80^RecName: Full=LOB domain-containing protein 41;^Eukaryota; Viridiplantae; Streptophyta; Embryophyta; Tracheophyta; Spermatophyta; Magnoliophyta; eudicotyledons; Gunneridae; Pentapetalae; rosids; malvids; Brassicales; Brassicaceae; Camelineae; Arabidopsis	.	Gene.1199::TCONS_00002810::g.1199::m.1199	2-784[+]	LBD41_ARATH^LBD41_ARATH^Q:17-251,H:1-226^54.81%ID^E:1e-81^RecName: Full=LOB domain-containing protein 41;^Eukaryota; Viridiplantae; Streptophyta; Embryophyta; Tracheophyta; Spermatophyta; Magnoliophyta; eudicotyledons; Gunneridae; Pentapetalae; rosids; malvids; Brassicales; Brassicaceae; Camelineae; Arabidopsis	PF03195.13^LOB^Lateral organ boundaries (LOB) domain^20-118^E:1.1e-21	.	.	ENOG410YBK4^lob domain-containing protein	KEGG:ath:AT3G02550	GO:0006355^biological_process^regulation of transcription, DNA-templated	.	.	.
XLOC_004578	TCONS_00008965	4.74894	5.31463569672245	8.22442642045825e-12	2.85066182424044e-10	HSL1_ARATH^HSL1_ARATH^Q:349-3192,H:15-961^42%ID^E:0^RecName: Full=Receptor-like protein kinase HSL1;^Eukaryota; Viridiplantae; Streptophyta; Embryophyta; Tracheophyta; Spermatophyta; Magnoliophyta; eudicotyledons; Gunneridae; Pentapetalae; rosids; malvids; Brassicales; Brassicaceae; Camelineae; Arabidopsis	.	Gene.14872::TCONS_00008965::g.14872::m.14872	1-3273[+]	HSL1_ARATH^HSL1_ARATH^Q:117-1064,H:15-961^42%ID^E:0^RecName: Full=Receptor-like protein kinase HSL1;^Eukaryota; Viridiplantae; Streptophyta; Embryophyta; Tracheophyta; Spermatophyta; Magnoliophyta; eudicotyledons; Gunneridae; Pentapetalae; rosids; malvids; Brassicales; Brassicaceae; Camelineae; Arabidopsis	PF00560.32^LRR_1^Leucine Rich Repeat^183-202^E:1.6`PF00560.32^LRR_1^Leucine Rich Repeat^329-345^E:0.52`PF13516.5^LRR_6^Leucine Rich repeat^329-342^E:1.8`PF13516.5^LRR_6^Leucine Rich repeat^493-510^E:1.2`PF13516.5^LRR_6^Leucine Rich repeat^588-603^E:0.69`PF13855.5^LRR_8^Leucine rich repeat^614-672^E:4.3e-09`PF13516.5^LRR_6^Leucine Rich repeat^637-652^E:0.35`PF00560.32^LRR_1^Leucine Rich Repeat^638…	.	ExpAA=64.38^PredHel=3^Topology=o50-69i90-109o721-743i	COG4886^leucine Rich Repeat	KEGG:ath:AT1G28440`KO:K00924	GO:0016021^cellular_component^integral component of membrane`GO:0005886^cellular_component^plasma membrane`GO:0005524^molecular_function^ATP binding`GO:0004674^molecular_function^protein serine/threonine kinase activity	GO:0005515^molecular_function^protein binding`GO:0004672^molecular_function^protein kinase activity`GO:0005524^molecular_function^ATP binding`GO:0006468^biological_process^protein phosphorylation	.	.
XLOC_007670	TCONS_00015118	4.74447	0.659343130719521	2.84485009101229e-05	0.000229785145967346	.	.	Gene.23448::TCONS_00015118::g.23448::m.23448	2-484[+]	.	.	.	.	.	.	.	.	.	.
XLOC_017535	TCONS_00034760	4.72044	4.70519274645636	1.7514392960502e-12	6.64335244935769e-11	ERF92_ARATH^ERF92_ARATH^Q:280-573,H:75-172^72.45%ID^E:7e-34^RecName: Full=Ethylene-responsive transcription factor 1B;^Eukaryota; Viridiplantae; Streptophyta; Embryophyta; Tracheophyta; Spermatophyta; Magnoliophyta; eudicotyledons; Gunneridae; Pentapetalae; rosids; malvids; Brassicales; Brassicaceae; Camelineae; Arabidopsis	.	Gene.59842::TCONS_00034760::g.59842::m.59842	1-696[+]	ERF92_ARATH^ERF92_ARATH^Q:86-227,H:67-209^61.11%ID^E:2e-51^RecName: Full=Ethylene-responsive transcription factor 1B;^Eukaryota; Viridiplantae; Streptophyta; Embryophyta; Tracheophyta; Spermatophyta; Magnoliophyta; eudicotyledons; Gunneridae; Pentapetalae; rosids; malvids; Brassicales; Brassicaceae; Camelineae; Arabidopsis	PF00847.19^AP2^AP2 domain^100-150^E:9e-14	.	.	ENOG410YJNR^Transcription factor	KEGG:ath:AT3G23240`KO:K14516	GO:0005634^cellular_component^nucleus`GO:0003677^molecular_function^DNA binding`GO:0003700^molecular_function^DNA binding transcription factor activity`GO:0006952^biological_process^defense response`GO:0009873^biological_process^ethylene-activated signaling pathway`GO:0009867^biological_process^jasmonic acid mediated signaling pathway`GO:0006351^biological_process^transcription, DNA-templated	GO:0003700^molecular_function^DNA binding transcription factor activity`GO:0006355^biological_process^regulation of transcription, DNA-templated	.	.
XLOC_015880	TCONS_00031602	4.6922	6.19970220810482	1.39691083295722e-19	1.41197249724553e-17	CHIT_PHAVU^CHIT_PHAVU^Q:4-960,H:1-315^63.32%ID^E:1e-142^RecName: Full=Endochitinase;^Eukaryota; Viridiplantae; Streptophyta; Embryophyta; Tracheophyta; Spermatophyta; Magnoliophyta; eudicotyledons; Gunneridae; Pentapetalae; rosids; fabids; Fabales; Fabaceae; Papilionoideae; Phaseoleae; Phaseolus	.	Gene.54752::TCONS_00031602::g.54752::m.54752	1-963[+]	CHIA_SECCE^CHIA_SECCE^Q:9-320,H:1-320^66.36%ID^E:5e-151^RecName: Full=Basic endochitinase A;^Eukaryota; Viridiplantae; Streptophyta; Embryophyta; Tracheophyta; Spermatophyta; Magnoliophyta; Liliopsida; Poales; Poaceae; BOP clade; Pooideae; Triticodae; Triticeae; Hordeinae; Secale	PF00187.18^Chitin_bind_1^Chitin recognition protein^30-67^E:2.1e-15`PF00182.18^Glyco_hydro_19^Chitinase class I^84-314^E:1.1e-124	sigP:1^28^0.891^YES	ExpAA=18.62^PredHel=1^Topology=i12-29o	.	.	GO:0005576^cellular_component^extracellular region`GO:0008061^molecular_function^chitin binding`GO:0004568^molecular_function^chitinase activity`GO:0016998^biological_process^cell wall macromolecule catabolic process`GO:0006032^biological_process^chitin catabolic process`GO:0050832^biological_process^defense response to fungus`GO:0031640^biological_process^killing of cells of other organism`GO:00…	GO:0008061^molecular_function^chitin binding`GO:0004568^molecular_function^chitinase activity`GO:0006032^biological_process^chitin catabolic process`GO:0016998^biological_process^cell wall macromolecule catabolic process	.	.
XLOC_000473	TCONS_00000904	4.68211	5.37049123642487	1.14355086468721e-23	1.629154786991e-21	.	.	.	.	.	.	.	.	.	.	.	.	.	.
XLOC_017358	TCONS_00034376	4.67745	-0.163293517783399	0.000253637114591613	0.00150214609306254	.	.	.	.	.	.	.	.	.	.	.	.	.	.
XLOC_008025	TCONS_00015754	4.66812	3.931444368438	3.07472135224643e-15	1.74940042220738e-13	ALMT8_ARATH^ALMT8_ARATH^Q:24-797,H:11-264^62.02%ID^E:2e-87^RecName: Full=Aluminum-activated malate transporter 8;^Eukaryota; Viridiplantae; Streptophyta; Embryophyta; Tracheophyta; Spermatophyta; Magnoliophyta; eudicotyledons; Gunneridae; Pentapetalae; rosids; malvids; Brassicales; Brassicaceae; Camelineae; Arabidopsis	.	Gene.25849::TCONS_00015754::g.25849::m.25849	48-821[+]	ALMT8_ARATH^ALMT8_ARATH^Q:4-252,H:22-266^63.05%ID^E:3e-99^RecName: Full=Aluminum-activated malate transporter 8;^Eukaryota; Viridiplantae; Streptophyta; Embryophyta; Tracheophyta; Spermatophyta; Magnoliophyta; eudicotyledons; Gunneridae; Pentapetalae; rosids; malvids; Brassicales; Brassicaceae; Camelineae; Arabidopsis	PF11744.7^ALMT^Aluminium activated malate transporter^18-251^E:3.5e-111`PF13515.5^FUSC_2^Fusaric acid resistance protein-like^42-181^E:6.4e-12	.	ExpAA=121.41^PredHel=6^Topology=i27-46o56-73i80-99o109-131i138-157o167-189i	ENOG410XR8V^aluminum-activated malate transporter	KEGG:ath:AT3G11680	GO:0016021^cellular_component^integral component of membrane`GO:0009705^cellular_component^plant-type vacuole membrane`GO:0015140^molecular_function^malate transmembrane transporter activity	GO:0015743^biological_process^malate transport	.	.
XLOC_015815	TCONS_00031478	4.66808	5.98874481659875	2.5174891577231e-25	3.99552029216528e-23	GAGT1_ARATH^GAGT1_ARATH^Q:171-1235,H:3-358^61.9%ID^E:8e-178^RecName: Full=Glutathione hydrolase 1;^Eukaryota; Viridiplantae; Streptophyta; Embryophyta; Tracheophyta; Spermatophyta; Magnoliophyta; eudicotyledons; Gunneridae; Pentapetalae; rosids; malvids; Brassicales; Brassicaceae; Camelineae; Arabidopsis`GAGT1_ARATH^GAGT1_ARATH^Q:1292-1699,H:359-496^73.19%ID^E:8e-178^RecName: Full=Glutathione hyd…	.	Gene.54237::TCONS_00031478::g.54237::m.54237	168-1337[+]	GAGT1_ARATH^GAGT1_ARATH^Q:2-356,H:3-358^61.9%ID^E:2e-148^RecName: Full=Glutathione hydrolase 1;^Eukaryota; Viridiplantae; Streptophyta; Embryophyta; Tracheophyta; Spermatophyta; Magnoliophyta; eudicotyledons; Gunneridae; Pentapetalae; rosids; malvids; Brassicales; Brassicaceae; Camelineae; Arabidopsis	PF01019.20^G_glu_transpept^Gamma-glutamyltranspeptidase^47-357^E:4.1e-102	sigP:1^22^0.838^YES	.	COG0405^gamma-glutamyltransferase activity	KEGG:ath:AT4G39640`KO:K18592	GO:0048046^cellular_component^apoplast`GO:0009505^cellular_component^plant-type cell wall`GO:0009506^cellular_component^plasmodesma`GO:0016756^molecular_function^glutathione gamma-glutamylcysteinyltransferase activity`GO:0036374^molecular_function^glutathione hydrolase activity`GO:0102953^molecular_function^hypoglycin A gamma-glutamyl transpeptidase activity`GO:0006751^biological_process^glutathi…	GO:0036374^molecular_function^glutathione hydrolase activity`GO:0006751^biological_process^glutathione catabolic process	.	.
XLOC_001606	TCONS_00003140	4.65823	8.07540964418194	1.10502958125551e-23	1.58676985822666e-21	KTI2_ARATH^KTI2_ARATH^Q:113-664,H:18-194^55.98%ID^E:5e-61^RecName: Full=Kunitz trypsin inhibitor 2 {ECO:0000305};^Eukaryota; Viridiplantae; Streptophyta; Embryophyta; Tracheophyta; Spermatophyta; Magnoliophyta; eudicotyledons; Gunneridae; Pentapetalae; rosids; malvids; Brassicales; Brassicaceae; Camelineae; Arabidopsis	.	Gene.2303::TCONS_00003140::g.2303::m.2303	2-670[+]	KTI2_ARATH^KTI2_ARATH^Q:26-221,H:6-194^54.59%ID^E:1e-72^RecName: Full=Kunitz trypsin inhibitor 2 {ECO:0000305};^Eukaryota; Viridiplantae; Streptophyta; Embryophyta; Tracheophyta; Spermatophyta; Magnoliophyta; eudicotyledons; Gunneridae; Pentapetalae; rosids; malvids; Brassicales; Brassicaceae; Camelineae; Arabidopsis	PF00197.17^Kunitz_legume^Trypsin and protease inhibitor^49-221^E:2.3e-60	.	ExpAA=20.49^PredHel=1^Topology=i20-42o	ENOG410YHN1^trypsin and protease inhibitor family protein Kunitz family protein	KEGG:ath:AT1G17860	GO:0048046^cellular_component^apoplast`GO:0005618^cellular_component^cell wall`GO:0004866^molecular_function^endopeptidase inhibitor activity	GO:0004866^molecular_function^endopeptidase inhibitor activity	.	.
XLOC_017293	TCONS_00034238	4.64554	1.21395071203631	5.88075144933418e-05	0.000430596665207621	.	.	.	.	.	.	.	.	.	.	.	.	.	.
XLOC_004178	TCONS_00008189	4.63155	7.17387633380558	2.53613083845252e-26	4.32888823208693e-24	.	.	Gene.11991::TCONS_00008189::g.11991::m.11991	182-598[-]	.	.	.	.	.	.	.	.	.	.
XLOC_003472	TCONS_00006831	4.62598	5.44452763001597	1.79436365208999e-19	1.77406675176307e-17	AHL17_ARATH^AHL17_ARATH^Q:139-867,H:32-275^58.23%ID^E:7e-61^RecName: Full=AT-hook motif nuclear-localized protein 17 {ECO:0000312|EMBL:FAA00288.1};^Eukaryota; Viridiplantae; Streptophyta; Embryophyta; Tracheophyta; Spermatophyta; Magnoliophyta; eudicotyledons; Gunneridae; Pentapetalae; rosids; malvids; Brassicales; Brassicaceae; Camelineae; Arabidopsis	.	Gene.14643::TCONS_00006831::g.14643::m.14643	1-876[+]	AHL17_ARATH^AHL17_ARATH^Q:47-289,H:32-275^63.45%ID^E:1e-98^RecName: Full=AT-hook motif nuclear-localized protein 17 {ECO:0000312|EMBL:FAA00288.1};^Eukaryota; Viridiplantae; Streptophyta; Embryophyta; Tracheophyta; Spermatophyta; Magnoliophyta; eudicotyledons; Gunneridae; Pentapetalae; rosids; malvids; Brassicales; Brassicaceae; Camelineae; Arabidopsis	PF03479.14^DUF296^Domain of unknown function (DUF296)^99-213^E:2.4e-25	.	ExpAA=22.54^PredHel=1^Topology=o190-212i	ENOG410YGVK^Domain of unknown function (DUF296)	KEGG:ath:AT5G49700	GO:0005634^cellular_component^nucleus`GO:0003680^molecular_function^AT DNA binding`GO:0003700^molecular_function^DNA binding transcription factor activity`GO:0006351^biological_process^transcription, DNA-templated	.	.	.
XLOC_006453	TCONS_00012755	4.61801	2.02547758514009	1.96422131303924e-07	2.90111479320971e-06	.	.	Gene.27952::TCONS_00012755::g.27952::m.27952	80-1147[+]	.	PF04788.11^DUF620^Protein of unknown function (DUF620)^99-337^E:3.5e-114	.	.	.	.	.	.	.	.
XLOC_001834	TCONS_00003568	4.60204	7.55844753084954	3.28979833831932e-17	2.41960655834193e-15	.	.	.	.	.	.	.	.	.	.	.	.	.	.
XLOC_007071	TCONS_00013972	4.59657	8.35858567017687	1.16001369214295e-26	2.03768230407208e-24	AB9C_ARATH^AB9C_ARATH^Q:109-4566,H:19-1498^64.63%ID^E:0^RecName: Full=ABC transporter C family member 9;^Eukaryota; Viridiplantae; Streptophyta; Embryophyta; Tracheophyta; Spermatophyta; Magnoliophyta; eudicotyledons; Gunneridae; Pentapetalae; rosids; malvids; Brassicales; Brassicaceae; Camelineae; Arabidopsis	.	Gene.19535::TCONS_00013972::g.19535::m.19535	1-4596[+]	AB9C_ARATH^AB9C_ARATH^Q:37-1522,H:19-1498^64.63%ID^E:0^RecName: Full=ABC transporter C family member 9;^Eukaryota; Viridiplantae; Streptophyta; Embryophyta; Tracheophyta; Spermatophyta; Magnoliophyta; eudicotyledons; Gunneridae; Pentapetalae; rosids; malvids; Brassicales; Brassicaceae; Camelineae; Arabidopsis	PF00664.22^ABC_membrane^ABC transporter transmembrane region^337-601^E:6.1e-25`PF00005.26^ABC_tran^ABC transporter^666-800^E:4.3e-19`PF00664.22^ABC_membrane^ABC transporter transmembrane region^971-1206^E:1.2e-30`PF00005.26^ABC_tran^ABC transporter^1296-1444^E:3.7e-29	.	ExpAA=298.82^PredHel=12^Topology=o47-69i102-124o144-161i170-189o204-223i332-354o369-388i445-466o470-492i553-575o1000-1022i1076-1098o	COG1132^(ABC) transporter	KEGG:ath:AT3G60160	GO:0016021^cellular_component^integral component of membrane`GO:0000325^cellular_component^plant-type vacuole`GO:0009506^cellular_component^plasmodesma`GO:0005774^cellular_component^vacuolar membrane`GO:0005524^molecular_function^ATP binding`GO:0042626^molecular_function^ATPase activity, coupled to transmembrane movement of substances`GO:0008559^molecular_function^xenobiotic transmembrane transpo…	GO:0005524^molecular_function^ATP binding`GO:0042626^molecular_function^ATPase activity, coupled to transmembrane movement of substances`GO:0006810^biological_process^transport`GO:0055085^biological_process^transmembrane transport`GO:0016021^cellular_component^integral component of membrane`GO:0016887^molecular_function^ATPase activity	.	.
XLOC_002356	TCONS_00004593	4.56498	0.545636012860176	1.18873634451136e-05	0.000108242610373649	CKX4_ARATH^CKX4_ARATH^Q:104-1567,H:32-524^50.7%ID^E:6e-167^RecName: Full=Cytokinin dehydrogenase 4;^Eukaryota; Viridiplantae; Streptophyta; Embryophyta; Tracheophyta; Spermatophyta; Magnoliophyta; eudicotyledons; Gunneridae; Pentapetalae; rosids; malvids; Brassicales; Brassicaceae; Camelineae; Arabidopsis	.	Gene.7258::TCONS_00004593::g.7258::m.7258	17-1573[+]	CKX4_ARATH^CKX4_ARATH^Q:27-517,H:29-524^51%ID^E:3e-172^RecName: Full=Cytokinin dehydrogenase 4;^Eukaryota; Viridiplantae; Streptophyta; Embryophyta; Tracheophyta; Spermatophyta; Magnoliophyta; eudicotyledons; Gunneridae; Pentapetalae; rosids; malvids; Brassicales; Brassicaceae; Camelineae; Arabidopsis	PF01565.22^FAD_binding_4^FAD binding domain^62-211^E:4.9e-12`PF09265.9^Cytokin-bind^Cytokinin dehydrogenase 1, FAD and cytokinin binding^243-516^E:8.2e-104	.	ExpAA=28.20^PredHel=1^Topology=i7-29o	COG0277^FAD linked oxidase domain protein	KEGG:ath:AT4G29740`KO:K00279	GO:0005615^cellular_component^extracellular space`GO:0019139^molecular_function^cytokinin dehydrogenase activity`GO:0050660^molecular_function^flavin adenine dinucleotide binding`GO:0016614^molecular_function^oxidoreductase activity, acting on CH-OH group of donors`GO:0008131^molecular_function^primary amine oxidase activity`GO:0009823^biological_process^cytokinin catabolic process	GO:0016491^molecular_function^oxidoreductase activity`GO:0050660^molecular_function^flavin adenine dinucleotide binding`GO:0055114^biological_process^oxidation-reduction process`GO:0019139^molecular_function^cytokinin dehydrogenase activity`GO:0009690^biological_process^cytokinin metabolic process	.	.
XLOC_009031	TCONS_00017793	4.56253	6.60240395876703	1.66390300810833e-17	1.26491584561782e-15	UGT9_GARJA^UGT9_GARJA^Q:501-1784,H:1-435^43.99%ID^E:2e-97^RecName: Full=Beta-D-glucosyl crocetin beta-1,6-glucosyltransferase;^Eukaryota; Viridiplantae; Streptophyta; Embryophyta; Tracheophyta; Spermatophyta; Magnoliophyta; eudicotyledons; Gunneridae; Pentapetalae; asterids; lamiids; Gentianales; Rubiaceae; Ixoroideae; Gardenieae complex; Gardenieae - Pavetteae clade; Gardenieae; Gardenia	.	Gene.33090::TCONS_00017793::g.33090::m.33090	450-1808[+]	UGT9_GARJA^UGT9_GARJA^Q:18-445,H:1-435^43.99%ID^E:4e-117^RecName: Full=Beta-D-glucosyl crocetin beta-1,6-glucosyltransferase;^Eukaryota; Viridiplantae; Streptophyta; Embryophyta; Tracheophyta; Spermatophyta; Magnoliophyta; eudicotyledons; Gunneridae; Pentapetalae; asterids; lamiids; Gentianales; Rubiaceae; Ixoroideae; Gardenieae complex; Gardenieae - Pavetteae clade; Gardenieae; Gardenia	PF00201.17^UDPGT^UDP-glucoronosyl and UDP-glucosyl transferase^266-422^E:4.4e-23	.	.	.	KEGG:ag:BAK55744`KO:K21354	GO:0016758^molecular_function^transferase activity, transferring hexosyl groups`GO:0008152^biological_process^metabolic process	GO:0016758^molecular_function^transferase activity, transferring hexosyl groups`GO:0008152^biological_process^metabolic process	.	.
XLOC_003116	TCONS_00006158	4.55433	5.68165879709896	3.76006199102118e-14	1.83867031360936e-12	DNJ11_ARATH^DNJ11_ARATH^Q:136-435,H:64-161^50%ID^E:2e-25^RecName: Full=Chaperone protein dnaJ 11, chloroplastic;^Eukaryota; Viridiplantae; Streptophyta; Embryophyta; Tracheophyta; Spermatophyta; Magnoliophyta; eudicotyledons; Gunneridae; Pentapetalae; rosids; malvids; Brassicales; Brassicaceae; Camelineae; Arabidopsis	.	.	.	.	.	.	.	COG2214^DNAj domain protein	KEGG:ath:AT4G36040	GO:0009507^cellular_component^chloroplast`GO:0009570^cellular_component^chloroplast stroma`GO:0005634^cellular_component^nucleus`GO:0009536^cellular_component^plastid	.	.	.
XLOC_012452	TCONS_00024578	4.54977	10.6510122965788	2.21673455688178e-14	1.11409384271284e-12	NIA_CUCMA^NIA_CUCMA^Q:110-2854,H:1-918^90.1%ID^E:0^RecName: Full=Nitrate reductase [NADH];^Eukaryota; Viridiplantae; Streptophyta; Embryophyta; Tracheophyta; Spermatophyta; Magnoliophyta; eudicotyledons; Gunneridae; Pentapetalae; rosids; fabids; Cucurbitales; Cucurbitaceae; Cucurbiteae; Cucurbita	.	Gene.40588::TCONS_00024578::g.40588::m.40588	110-2857[+]	NIA_CUCMA^NIA_CUCMA^Q:1-915,H:1-918^90.98%ID^E:0^RecName: Full=Nitrate reductase [NADH];^Eukaryota; Viridiplantae; Streptophyta; Embryophyta; Tracheophyta; Spermatophyta; Magnoliophyta; eudicotyledons; Gunneridae; Pentapetalae; rosids; fabids; Cucurbitales; Cucurbitaceae; Cucurbiteae; Cucurbita	PF00174.18^Oxidored_molyb^Oxidoreductase molybdopterin binding domain^146-325^E:6.9e-57`PF03404.15^Mo-co_dimer^Mo-co oxidoreductase dimerisation domain^353-483^E:1.3e-52`PF00173.27^Cyt-b5^Cytochrome b5-like Heme/Steroid binding domain^543-613^E:6.5e-25`PF00970.23^FAD_binding_6^Oxidoreductase FAD-binding domain^663-770^E:6e-33`PF00175.20^NAD_binding_1^Oxidoreductase NAD-binding domain^790-896^E:2.…	.	.	.	.	GO:0020037^molecular_function^heme binding`GO:0030151^molecular_function^molybdenum ion binding`GO:0043546^molecular_function^molybdopterin cofactor binding`GO:0009703^molecular_function^nitrate reductase (NADH) activity`GO:0050464^molecular_function^nitrate reductase (NADPH) activity`GO:0042128^biological_process^nitrate assimilation`GO:0006809^biological_process^nitric oxide biosynthetic process	GO:0042128^biological_process^nitrate assimilation`GO:0016491^molecular_function^oxidoreductase activity`GO:0030151^molecular_function^molybdenum ion binding`GO:0055114^biological_process^oxidation-reduction process	.	.
XLOC_000021	TCONS_00000040	4.53774	7.31890676321374	1.66521148446652e-16	1.10767174222252e-14	FB76_ARATH^FB76_ARATH^Q:325-1152,H:85-363^69.89%ID^E:3e-133^RecName: Full=F-box protein At1g67340;^Eukaryota; Viridiplantae; Streptophyta; Embryophyta; Tracheophyta; Spermatophyta; Magnoliophyta; eudicotyledons; Gunneridae; Pentapetalae; rosids; malvids; Brassicales; Brassicaceae; Camelineae; Arabidopsis	.	Gene.160::TCONS_00000040::g.160::m.160	145-1209[+]	FB76_ARATH^FB76_ARATH^Q:14-336,H:38-363^66.56%ID^E:8e-154^RecName: Full=F-box protein At1g67340;^Eukaryota; Viridiplantae; Streptophyta; Embryophyta; Tracheophyta; Spermatophyta; Magnoliophyta; eudicotyledons; Gunneridae; Pentapetalae; rosids; malvids; Brassicales; Brassicaceae; Camelineae; Arabidopsis	PF00646.32^F-box^F-box domain^20-67^E:0.0086`PF12937.6^F-box-like^F-box-like^22-62^E:1.5e-05`PF08238.11^Sel1^Sel1 repeat^97-111^E:1600`PF08238.11^Sel1^Sel1 repeat^131-167^E:4.6`PF08238.11^Sel1^Sel1 repeat^170-199^E:0.42`PF01753.17^zf-MYND^MYND finger^280-319^E:1.2e-07	.	.	ENOG410YZID^F-box protein	KEGG:ath:AT1G67340	GO:0005634^cellular_component^nucleus`GO:0016567^biological_process^protein ubiquitination	GO:0005515^molecular_function^protein binding	.	.
XLOC_006105	TCONS_00012033	4.53604	4.44043981194769	7.71954200373838e-18	6.14818118459359e-16	DLO2_ARATH^DLO2_ARATH^Q:97-1065,H:15-327^41.54%ID^E:7e-86^RecName: Full=Protein DMR6-LIKE OXYGENASE 2 {ECO:0000303|PubMed:25376907};^Eukaryota; Viridiplantae; Streptophyta; Embryophyta; Tracheophyta; Spermatophyta; Magnoliophyta; eudicotyledons; Gunneridae; Pentapetalae; rosids; malvids; Brassicales; Brassicaceae; Camelineae; Arabidopsis	.	Gene.25384::TCONS_00012033::g.25384::m.25384	1-1128[+]	DLO2_ARATH^DLO2_ARATH^Q:33-355,H:15-327^41.85%ID^E:5e-87^RecName: Full=Protein DMR6-LIKE OXYGENASE 2 {ECO:0000303|PubMed:25376907};^Eukaryota; Viridiplantae; Streptophyta; Embryophyta; Tracheophyta; Spermatophyta; Magnoliophyta; eudicotyledons; Gunneridae; Pentapetalae; rosids; malvids; Brassicales; Brassicaceae; Camelineae; Arabidopsis	PF14226.5^DIOX_N^non-haem dioxygenase in morphine synthesis N-terminal^65-165^E:8e-27`PF03171.19^2OG-FeII_Oxy^2OG-Fe(II) oxygenase superfamily^228-322^E:6.3e-29	.	.	COG3491^2OGFe(II) oxygenase	KEGG:ath:AT4G10490	GO:0051213^molecular_function^dioxygenase activity`GO:0046872^molecular_function^metal ion binding`GO:0002229^biological_process^defense response to oomycetes`GO:0046244^biological_process^salicylic acid catabolic process	GO:0016491^molecular_function^oxidoreductase activity`GO:0055114^biological_process^oxidation-reduction process	.	.
XLOC_001706	TCONS_00003336	4.5321	2.52838531099531	2.37684553734261e-06	2.66941442005833e-05	STGL1_ARATH^STGL1_ARATH^Q:362-117,H:67-152^47.67%ID^E:7e-21^RecName: Full=Stigma-specific STIG1-like protein 1 {ECO:0000303|PubMed:19279211};^Eukaryota; Viridiplantae; Streptophyta; Embryophyta; Tracheophyta; Spermatophyta; Magnoliophyta; eudicotyledons; Gunneridae; Pentapetalae; rosids; malvids; Brassicales; Brassicaceae; Camelineae; Arabidopsis	.	Gene.3043::TCONS_00003336::g.3043::m.3043	114-584[-]	STGL1_ARATH^STGL1_ARATH^Q:75-156,H:67-152^47.67%ID^E:1e-21^RecName: Full=Stigma-specific STIG1-like protein 1 {ECO:0000303|PubMed:19279211};^Eukaryota; Viridiplantae; Streptophyta; Embryophyta; Tracheophyta; Spermatophyta; Magnoliophyta; eudicotyledons; Gunneridae; Pentapetalae; rosids; malvids; Brassicales; Brassicaceae; Camelineae; Arabidopsis	PF04885.12^Stig1^Stigma-specific protein, Stig1^30-156^E:1.8e-40	sigP:1^23^0.859^YES	ExpAA=17.46^PredHel=1^Topology=i7-26o	ENOG4111VQ8^Stigma-specific protein, Stig1	KEGG:ath:AT4G26880	.	.	.	.
XLOC_009397	TCONS_00018521	4.5247	1.7492112146793	9.68342045598618e-06	9.05905513496164e-05	EP1L2_ARATH^EP1L2_ARATH^Q:106-1392,H:10-455^62.78%ID^E:0^RecName: Full=EP1-like glycoprotein 2 {ECO:0000305};^Eukaryota; Viridiplantae; Streptophyta; Embryophyta; Tracheophyta; Spermatophyta; Magnoliophyta; eudicotyledons; Gunneridae; Pentapetalae; rosids; malvids; Brassicales; Brassicaceae; Camelineae; Arabidopsis	.	Gene.35531::TCONS_00018521::g.35531::m.35531	1-1401[+]	EP1L2_ARATH^EP1L2_ARATH^Q:30-464,H:4-455^62.17%ID^E:0^RecName: Full=EP1-like glycoprotein 2 {ECO:0000305};^Eukaryota; Viridiplantae; Streptophyta; Embryophyta; Tracheophyta; Spermatophyta; Magnoliophyta; eudicotyledons; Gunneridae; Pentapetalae; rosids; malvids; Brassicales; Brassicaceae; Camelineae; Arabidopsis	PF01453.23^B_lectin^D-mannose binding lectin^115-210^E:9.2e-27`PF14295.5^PAN_4^PAN domain^417-436^E:0.72	.	ExpAA=20.44^PredHel=1^Topology=i20-42o	ENOG410YGSV^Curculin-like mannose-binding lectin family protein	KEGG:ath:AT1G78830	GO:0048046^cellular_component^apoplast`GO:0005618^cellular_component^cell wall`GO:0005794^cellular_component^Golgi apparatus`GO:0009505^cellular_component^plant-type cell wall`GO:0005886^cellular_component^plasma membrane`GO:0009506^cellular_component^plasmodesma`GO:0030246^molecular_function^carbohydrate binding`GO:0009735^biological_process^response to cytokinin	.	.	.
XLOC_001658	TCONS_00003248	4.51824	7.68495667382595	7.06912838941866e-16	4.35039931801877e-14	BT1_ARATH^BT1_ARATH^Q:183-1130,H:18-335^62.54%ID^E:2e-130^RecName: Full=BTB/POZ and TAZ domain-containing protein 1;^Eukaryota; Viridiplantae; Streptophyta; Embryophyta; Tracheophyta; Spermatophyta; Magnoliophyta; eudicotyledons; Gunneridae; Pentapetalae; rosids; malvids; Brassicales; Brassicaceae; Camelineae; Arabidopsis	.	Gene.2731::TCONS_00003248::g.2731::m.2731	63-1244[+]	BT1_ARATH^BT1_ARATH^Q:41-356,H:18-335^62.54%ID^E:5e-134^RecName: Full=BTB/POZ and TAZ domain-containing protein 1;^Eukaryota; Viridiplantae; Streptophyta; Embryophyta; Tracheophyta; Spermatophyta; Magnoliophyta; eudicotyledons; Gunneridae; Pentapetalae; rosids; malvids; Brassicales; Brassicaceae; Camelineae; Arabidopsis	PF00651.30^BTB^BTB/POZ domain^48-148^E:4.5e-10`PF02135.15^zf-TAZ^TAZ zinc finger^232-319^E:3.6e-10	.	.	COG5076^bromodomain	KEGG:ath:AT5G63160	GO:0005737^cellular_component^cytoplasm`GO:0005634^cellular_component^nucleus`GO:0019005^cellular_component^SCF ubiquitin ligase complex`GO:0005516^molecular_function^calmodulin binding`GO:0004402^molecular_function^histone acetyltransferase activity`GO:0003712^molecular_function^transcription cofactor activity`GO:0031625^molecular_function^ubiquitin protein ligase binding`GO:0008270^molecular_fu…	GO:0005515^molecular_function^protein binding`GO:0003712^molecular_function^transcription cofactor activity`GO:0004402^molecular_function^histone acetyltransferase activity`GO:0008270^molecular_function^zinc ion binding`GO:0006355^biological_process^regulation of transcription, DNA-templated`GO:0005634^cellular_component^nucleus	.	.
XLOC_008133	TCONS_00015964	4.51166	8.9588670940848	3.54142762616652e-21	4.1073750025789e-19	.	.	.	.	.	.	.	.	.	.	.	.	.	.
XLOC_011961	TCONS_00023635	4.50798	-0.904374058538043	0.00111798933562918	0.00518129637539415	.	.	Gene.37277::TCONS_00023635::g.37277::m.37277	1-540[+]	.	PF04504.13^DUF573^Protein of unknown function, DUF573^26-118^E:9e-10	.	.	.	.	.	GO:0006355^biological_process^regulation of transcription, DNA-templated	.	.
XLOC_008685	TCONS_00017075	4.49724	4.04844018361189	1.52958403405679e-13	6.85018909113602e-12	.	.	.	.	.	.	.	.	.	.	.	.	.	.
[truncated: 5,735 more rows]

## Sheet: Supplementary Materials Data S3
Geneid	transcript_id	logFC	logCPM	PValue	FDR	sprot_Top_BLASTX_hit	RNAMMER	prot_id	prot_coords	sprot_Top_BLASTP_hit	Pfam	SignalP	TmHMM	eggnog	Kegg	gene_ontology_blast	gene_ontology_pfam	transcript	peptide
XLOC_010472	TCONS_00020708	8.09141	0.160927	1.16379e-06	0.000140376	.	.	.	.	.	.	.	.	.	.	.	.	.	.
[truncated: 653 more rows]

## Sheet: Supplementary Materials Data S4
Geneid	transcript_id	logFC	logCPM	PValue	FDR	sprot_Top_BLASTX_hit	RNAMMER	prot_id	prot_coords	sprot_Top_BLASTP_hit	Pfam	SignalP	TmHMM	eggnog	Kegg	gene_ontology_blast	gene_ontology_pfam	transcript	peptide
[truncated: 5,007 more rows]

## Sheet: Supplementary Materials Data S5
Geneid	transcript_id	logFC	logCPM	PValue	FDR	sprot_Top_BLASTX_hit	RNAMMER	prot_id	prot_coords	sprot_Top_BLASTP_hit	Pfam	SignalP	TmHMM	eggnog	Kegg	gene_ontology_blast	gene_ontology_pfam	transcript	peptide
[truncated: 426 more rows]

## Sheet: Supplementary Materials Data S6
Geneid	transcript_id	logFC	logCPM	PValue	FDR	sprot_Top_BLASTX_hit	RNAMMER	prot_id	prot_coords	sprot_Top_BLASTP_hit	Pfam	SignalP	TmHMM	eggnog	Kegg	gene_ontology_blast	gene_ontology_pfam	transcript	peptide
[truncated: 8,927 more rows]

[truncated: 4 more sheets: Supplementary Materials Data S7, Supplementary Materials Data S8, Supplementary MaterialS Data S9, Supplementary Materials DataS10]
